# Supplementary material for: Catalytic asymmetric C–Si bond activation via torsional strain-promoted Rh-catalyzed aryl-Narasaka acylation
Source: PubMed Central journal article supplement (PMC7477585; doi:10.1038/s41467-020-18273-3), 2020-09-07
Supplement: 41467_2020_18273_MOESM1_ESM.pdf [file 41467_2020_18273_MOESM1_ESM.pdf]

## **Supplementary Information**

### **Catalytic Asymmetric C-Si Bond Activation via Torsional Strain-Promoted Rh-Catalyzed Aryl-Narasaka Acylation**

Feng *et al.*

## Supplementary Methods

### General Information

Nuclear magnetic resonances were recorded on Bruker-400 MHz and Bruker-500 MHz instruments. Reference values for residual solvents were taken as  $\delta = 7.26$  ppm ( $\text{CDCl}_3$ ), 2.50 ppm ( $\text{DMSO-d}_6$ ) for  $^1\text{H}$  NMR;  $\delta = 77.00$  ppm ( $\text{CDCl}_3$ ),  $\delta = 39.00$  ppm ( $\text{DMSO-d}_6$ ) for  $^{13}\text{C}$  NMR. All reactions were performed under an inert atmosphere of dry nitrogen in flame-dried glassware, unless otherwise stated. 1,4-Dioxane and tetrahydrofuran were distilled over sodium in the presence of benzophenone under an atmosphere of nitrogen. Toluene and dichloromethane were distilled over calcium hydride under an atmosphere of nitrogen.

### Typical procedure for the preparation of the L7 (Typical Procedure A)

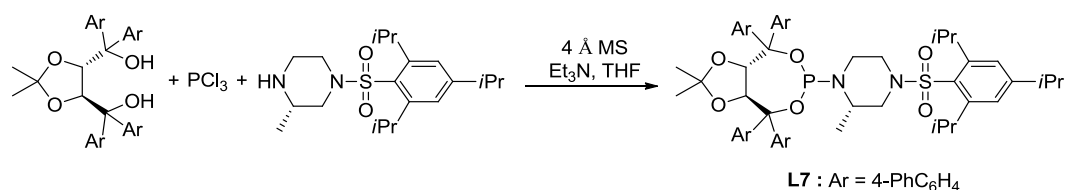

The 4-PhC<sub>6</sub>H<sub>4</sub>-TADDOL (2.313 g, 3.00 mmol, 1.0 equiv) was added to a flame-dried round bottom flask charged with 4 Å molecular sieves, followed by the addition of Et<sub>3</sub>N (4.50 mL, 32.37 mmol, 11.0 equiv) and THF (30 mL). After the mixture being cooled to 0 °C, phosphorus trichloride (0.31 mL, 3.60 mmol, 1.2 equiv) was added dropwise and the mixture was stirred at room temperature for 45 minutes. A mixture of (*S*)-3-methyl-1-((2,4,6-triisopropylphenyl)sulfonyl)piperazine (3.300 g, 9.00 mmol, 3.0 equiv) and Et<sub>3</sub>N (1.80 mL, 12.95 mmol, 4.3 equiv) in THF (10 mL) was added slowly at 0 °C and the mixture was allowed to warm to room temperature and stirred overnight. Ethyl ether (10 mL) was added to the reaction flask and the mixture was filtered through a pad of Celite. The filtrate was concentrated in vacuum and the residue was purified by flash column chromatography (PE/EtOAc = 95:5) on silica gel which was pre-treated with Et<sub>3</sub>N to afford **L7** (2.640 g, 76%).  $[\alpha]_D^{20} + 54.19$  (c 1.13, CH<sub>2</sub>Cl<sub>2</sub>).  $^1\text{H}$  NMR (500 MHz, CDCl<sub>3</sub>)  $\delta$  7.89 (d,  $J = 8.5$  Hz, 2H), 7.74 (d,  $J = 8.4$  Hz, 2H), 7.67 – 7.62 (m, 4H), 7.62 – 7.61 (m, 4H), 7.61 – 7.59 (m, 4H), 7.59 – 7.56 (m, 4H), 7.56 – 7.49 (m, 4H), 7.48 – 7.45 (m, 4H), 7.45 – 7.41 (m, 4H), 7.39 – 7.32 (m, 4H), 7.23 – 7.18 (m, 2H), 5.29 (dd,  $J = 8.6, 3.4$  Hz, 1H), 4.89 (d,  $J = 8.4$  Hz, 1H), 4.23 (hept,  $J = 6.7$  Hz, 2H), 4.04 – 3.89 (m, 1H), 3.63 – 3.53 (m, 1H), 3.53 – 3.44 (m, 1H), 3.40 (dd,  $J = 11.3, 3.1$  Hz, 1H), 3.37 – 3.30 (m, 1H), 3.18 (dd,  $J = 11.5, 3.4$  Hz, 1H), 3.14 – 3.06 (m, 1H), 2.93 (hept,  $J = 7.0$  Hz, 1H), 1.42 (s, 3H), 1.41 (d,  $J = 4.7$ , 3H), 1.32 – 1.27 (m, 18H), 0.44 (s, 3H).  $^{13}\text{C}$  NMR (126 MHz, CDCl<sub>3</sub>)  $\delta$  153.4, 151.9, 145.8, 145.28, 145.27, 141.0, 140.7, 140.63, 140.62, 140.5, 140.4, 140.3, 140.04, 140.00, 139.9, 129.5, 129.3, 129.14, 129.10, 128.73, 128.71, 128.70, 127.5, 127.4, 127.3, 127.2, 127.04, 127.00, 126.9, 126.5, 126.3, 125.9, 123.9, 111.9,

82.5 (d,  $J = 2.8$  Hz), 82.3 (d,  $J = 16.8$  Hz), 82.0, 81.4 (d,  $J = 7.3$  Hz), 49.7 (d,  $J = 3.7$  Hz), 48.1 (d,  $J = 19.4$  Hz), 46.1 (d,  $J = 1.6$  Hz), 38.9 (d,  $J = 10.3$  Hz), 34.2, 29.5, 27.6, 25.5, 25.1, 24.8, 23.54, 23.53, 17.6 (d,  $J = 7.7$  Hz).  $^{31}\text{P}$  NMR (202 MHz,  $\text{CDCl}_3$ )  $\delta$  137.5. HRMS (ESI) calcd for  $\text{C}_{75}\text{H}_{78}\text{N}_2\text{O}_6\text{PS}$   $[\text{M}+\text{H}]^+$  1165.5318, found 1165.5313.

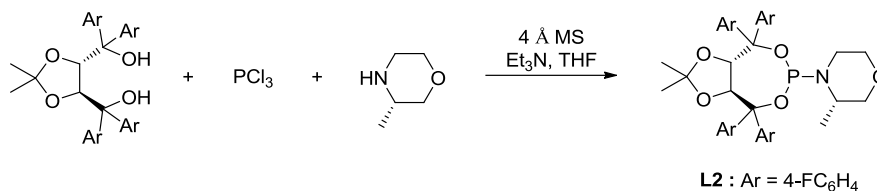

### **L2** was prepared following the **Typical Procedure A**

The reaction of 4- $\text{FC}_6\text{H}_4$ -TADDOL (0.538 g, 1.00 mmol), phosphorus trichloride (0.10 mL, 1.20 mmol), (*S*)-3-methylmorpholine (0.304 g, 3.00 mmol) and 4 Å molecular sieves afforded **L2** (0.374 g, 56%).  $[\alpha]_D^{20} + 97.56$  (c 1.18,  $\text{CH}_2\text{Cl}_2$ ).  $^1\text{H}$  NMR (400 MHz,  $\text{CDCl}_3$ )  $\delta$  7.72 – 7.64 (m, 2H), 7.58 – 7.51 (m, 2H), 7.41 – 7.35 (m, 2H), 7.34 – 7.28 (m, 2H), 7.06 – 7.01 (m, 2H), 7.01 – 6.99 (m, 2H), 6.99 – 6.97 (m, 2H), 6.97 – 6.91 (m, 2H), 5.01 (dd,  $J = 8.6, 3.4$  Hz, 1H), 4.60 (d,  $J = 8.4$  Hz, 1H), 3.81 (dt,  $J = 10.8, 3.2$  Hz, 1H), 3.68 – 3.58 (m, 2H), 3.58 – 3.49 (m, 2H), 3.49 – 3.38 (m, 1H), 3.32 – 3.22 (m, 1H), 1.33 (d,  $J = 6.4$  Hz, 3H), 1.29 (s, 3H), 0.37 (s, 3H).  $^{13}\text{C}$  NMR (100 MHz,  $\text{CDCl}_3$ )  $\delta$  162.1 (d,  $J = 245.4$  Hz), 162.0 (d,  $J = 245.6$  Hz), 161.9 (d,  $J = 245.4$  Hz), 142.5 (d,  $J = 3.4$  Hz), 142.0, 137.64, 137.63, 137.61, 137.60, 137.04, 137.03, 130.53, 130.51, 130.47, 130.45, 130.43, 130.39, 128.8, 128.7, 128.6, 115.1 (d,  $J = 21.2$  Hz), 114.7 (d,  $J = 21.1$  Hz), 114.5 (d,  $J = 20.8$  Hz), 114.1 (d,  $J = 21.2$  Hz), 111.9, 82.2 (d,  $J = 3.7$  Hz), 82.0 (d,  $J = 21.1$  Hz), 81.5, 80.6 (d,  $J = 9.2$  Hz), 72.6 (d,  $J = 4.8$  Hz), 68.2 (d,  $J = 3.3$  Hz), 48.5 (d,  $J = 21.9$  Hz), 39.5 (d,  $J = 12.0$  Hz), 27.50, 25.48, 16.7 (d,  $J = 9.5$  Hz).  $^{31}\text{P}$  NMR (162 MHz,  $\text{CDCl}_3$ )  $\delta$  137.1.  $^{19}\text{F}$  NMR (376 MHz,  $\text{CDCl}_3$ )  $\delta$  -114.4, -114.7, -115.2, -115.3. HRMS (ESI) calcd for  $\text{C}_{36}\text{H}_{35}\text{F}_4\text{NO}_5\text{P}$   $[\text{M}+\text{H}]^+$  668.2189, found 668.2190.

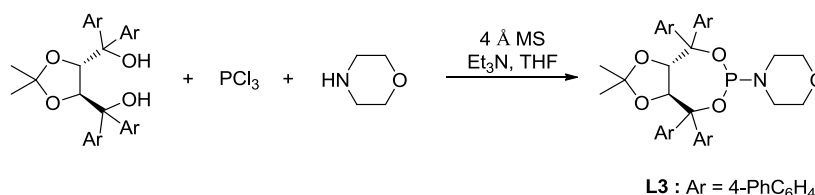

### **L3** was prepared following the **Typical Procedure A**

The reaction of 4- $\text{PhC}_6\text{H}_4$ -TADDOL (0.280 g, 0.60 mmol), phosphorus trichloride (63  $\mu\text{L}$ , 0.72 mmol), morpholine (0.375 g, 3.00 mmol) and 4 Å molecular sieves afforded **L3** (0.194 g, 52%).  $[\alpha]_D^{20} + 91.18$  (c 0.99,  $\text{CH}_2\text{Cl}_2$ ).  $^1\text{H}$  NMR (400 MHz,  $\text{CDCl}_3$ )  $\delta$  7.90 (d,  $J = 8.4$  Hz, 2H), 7.76 (d,  $J = 8.0$  Hz, 2H), 7.65 – 7.61 (m, 4H), 7.61 – 7.59 (m, 8H), 7.59 – 7.56 (m, 4H), 7.56 – 7.51 (m, 4H), 7.47 – 7.44 (m, 2H), 7.44 – 7.42 (m, 4H), 7.42 – 7.40 (m, 2H), 7.34 (t,  $J = 7.2$  Hz, 4H), 5.29 (dd,  $J = 8.6, 3.4$  Hz, 1H), 4.90 (d,  $J = 8.4$  Hz, 1H), 3.90 – 3.67 (m, 4H), 3.52 – 3.39 (m, 2H), 3.39 – 3.26 (m, 2H), 1.41 (s, 3H), 0.42 (s, 3H).  $^{13}\text{C}$  NMR (100 MHz,  $\text{CDCl}_3$ )  $\delta$  145.7, 145.2, 140.9, 140.69, 140.67, 140.63, 140.55, 140.4, 140.02, 139.96, 129.4, 129.14, 129.09, 128.7, 127.5, 127.4, 127.3, 127.08, 127.05, 127.01, 126.96, 126.6, 126.3, 125.9, 111.9, 82.6 (d,  $J = 2.8$  Hz), 82.4 (d,  $J = 19.9$  Hz), 81.9, 81.3 (d,  $J = 8.0$  Hz), 67.9 (d,  $J = 5.8$  Hz), 44.2 (d,  $J = 17.1$  Hz), 27.7, 25.5.  $^{31}\text{P}$  NMR (162 MHz,  $\text{CDCl}_3$ )  $\delta$  138.0. HRMS (ESI) calcd for  $\text{C}_{59}\text{H}_{53}\text{NO}_5\text{P}$   $[\text{M}+\text{H}]^+$  886.3661, found 886.3671.

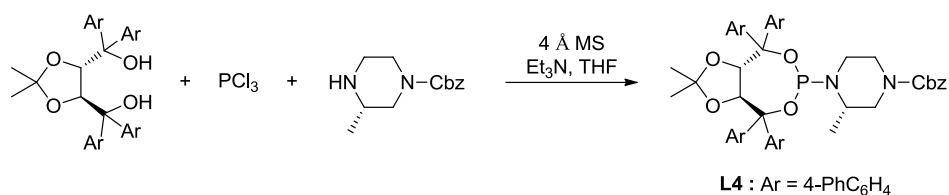

**L4** was prepared following the **Typical Procedure A**

The reaction of 4-PhC<sub>6</sub>H<sub>4</sub>-TADDOL (0.771 g, 1.00 mmol), phosphorus trichloride (0.10 mL, 1.20 mmol), benzyl (*S*)-3-methylpiperazine-1-carboxylate (0.70 mL, 3.00 mmol) and 4 Å molecular sieves afforded **L4** (0.671 g, 65%).  $[\alpha]_D^{20} + 70.31$  (c 1.03, CH<sub>2</sub>Cl<sub>2</sub>). **<sup>1</sup>H NMR** (500 MHz, CDCl<sub>3</sub>)  $\delta$  7.92 (d, *J* = 8.0 Hz, 2H), 7.75 (d, *J* = 8.0 Hz, 2H), 7.66 – 7.65 (m, 1H), 7.65 – 7.63 (m, 2H), 7.63 – 7.61 (m, 4H), 7.61 – 7.60 (m, 4H), 7.60 – 7.58 (m, 4H), 7.58 – 7.56 (m, 2H), 7.56 – 7.54 (m, 2H), 7.48 – 7.45 (m, 4H), 7.45 – 7.42 (m, 4H), 7.42 – 7.40 (m, 2H), 7.40 – 7.38 (m, 2H), 7.38 – 7.36 (m, 2H), 7.36 – 7.35 (m, 2H), 7.35 – 7.32 (m, 2H), 5.31 (dd, *J* = 8.5, 3.0 Hz, 1H), 5.26 – 5.09 (m, 2H), 4.89 (d, *J* = 8.5 Hz, 1H), 4.21 – 3.86 (m, 2H), 3.80 (d, *J* = 13.0 Hz, 1H), 3.64 – 3.40 (m, 2H), 3.38 – 3.13 (m, 2H), 1.45 (s, 3H), 1.36 (s, 3H), 0.43 (s, 3H). **<sup>13</sup>C NMR** (126 MHz, CDCl<sub>3</sub>)  $\delta$  155.8, 145.9, 145.4, 145.3, 141.0, 140.68, 140.65, 140.6, 140.5, 140.3, 140.02, 140.00, 139.9, 136.7, 129.4, 129.14, 129.10, 128.73, 128.70, 128.5, 128.0, 127.9, 127.5, 127.4, 127.28, 127.26, 127.2, 127.1, 127.04, 127.00, 126.99, 126.9, 126.5, 126.3, 125.9, 111.8, 82.7 (d, *J* = 3.0 Hz), 82.4 (d, *J* = 21.4 Hz), 81.8, 81.3 (d, *J* = 8.8 Hz), 67.2, 50.2, 49.8, 48.3, 47.8, 45.5, 45.2, 38.8 (d, *J* = 22.2 Hz), 27.7, 25.4, 17.0. **<sup>31</sup>P NMR** (202 MHz, CDCl<sub>3</sub>)  $\delta$  138.15. **HRMS (ESI)** calcd for C<sub>68</sub>H<sub>62</sub>N<sub>2</sub>O<sub>6</sub>P [M+H]<sup>+</sup> 1033.4345, found 1033.4331.

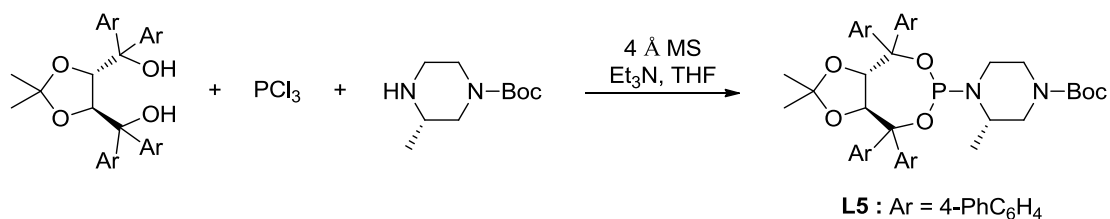

**L5** was prepared following the **Typical Procedure A**

The reaction of 4-PhC<sub>6</sub>H<sub>4</sub>-TADDOL (0.771 g, 1.00 mmol), phosphorus trichloride (0.10 mL, 1.20 mmol), benzyl *tert*-butyl (*S*)-3-methylpiperazine-1-carboxylate (0.601 g, 3.00 mmol) and 4 Å molecular sieves afforded **L5** (0.383 g, 38%).  $[\alpha]_D^{20} + 68.81$  (c 0.89, CH<sub>2</sub>Cl<sub>2</sub>). **<sup>1</sup>H NMR** (500 MHz, CDCl<sub>3</sub>)  $\delta$  8.00 (d, *J* = 8.0 Hz, 2H), 7.82 (d, *J* = 8.0 Hz, 2H), 7.71 – 7.68 (m, 4H), 7.68 – 7.67 (m, 4H), 7.67 – 7.66 (m, 2H), 7.66 – 7.65 (m, 4H), 7.65 – 7.63 (m, 2H), 7.63 – 7.61 (m, 4H), 7.52 – 7.49 (m, 4H), 7.48 – 7.45 (m, 4H), 7.42 – 7.39 (m, 2H), 7.39 – 7.36 (m, 2H), 5.39 (d, *J* = 8.0 Hz, 1H), 4.95 (d, *J* = 8.0 Hz, 1H), 4.21 – 3.89 (m, 2H), 3.80 (d, *J* = 12.5 Hz, 1H), 3.67 – 3.45 (m, 2H), 3.34 – 3.11 (m, 2H), 1.57 (s, 9H), 1.52 (s, 3H), 1.42 (d, *J* = 7.0 Hz, 3H), 0.49 (s, 3H). **<sup>13</sup>C NMR** (126 MHz, CDCl<sub>3</sub>)  $\delta$  155.2, 145.9, 145.41, 145.39, 141.1, 140.7, 140.64, 140.59, 140.54, 140.49, 140.3, 140.0, 139.9, 129.4, 129.12, 129.08, 128.70, 128.68, 127.5, 127.4, 127.3, 127.23, 127.19, 127.03, 127.01, 126.97, 126.96, 126.9, 126.5, 126.3, 125.9, 111.7, 82.7 (d, *J* = 3.3 Hz), 82.4 (d, *J* = 21.4 Hz), 81.7, 81.3 (d, *J* = 8.7 Hz), 79.6, 50.4, 49.2, 48.2, 45.7, 44.5, 39.0, 28.4, 27.7, 25.4, 17.0. **<sup>31</sup>P NMR** (202 MHz, CDCl<sub>3</sub>)  $\delta$  138.19. **HRMS (ESI)** calcd for C<sub>65</sub>H<sub>64</sub>N<sub>2</sub>O<sub>6</sub>P [M+H]<sup>+</sup> 999.4502, found 999.4504.



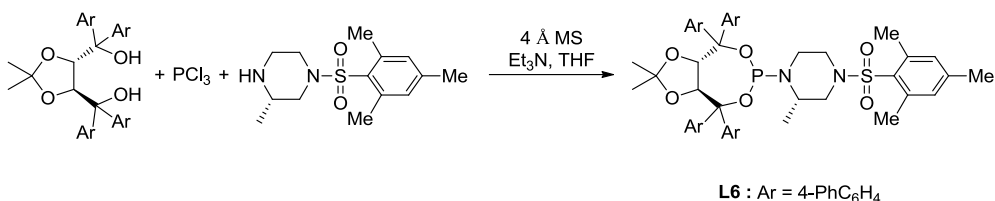

**L6** was prepared following the **Typical Procedure A**

The reaction of 4-PhC<sub>6</sub>H<sub>4</sub>-TADDOL (0.385 g, 0.50 mmol), phosphorus trichloride (50  $\mu$ L, 0.60 mmol), (*S*)-1-(mesitylsulfonyl)-3-methylpiperazine (0.424 g, 1.50 mmol) and 4 Å molecular sieves afforded **L6** (0.336 g, 62%).  $[\alpha]_D^{20} + 97.70$  (c 1.00, CH<sub>2</sub>Cl<sub>2</sub>). **<sup>1</sup>H NMR** (400 MHz, CDCl<sub>3</sub>)  $\delta$  7.87 (d, *J* = 8.4 Hz, 2H), 7.71 (d, *J* = 8.4 Hz, 2H), 7.65 – 7.63 (m, 2H), 7.63 – 7.62 (m, 2H), 7.62 – 7.61 (m, 2H), 7.61 – 7.60 (m, 2H), 7.60 – 7.59 (m, 2H), 7.59 – 7.57 (m, 4H), 7.56 – 7.53 (m, 2H), 7.53 – 7.50 (m, 2H), 7.50 – 7.46 (m, 2H), 7.46 – 7.44 (m, 4H), 7.44 – 7.43 (m, 2H), 7.43 – 7.40 (m, 2H), 7.39 – 7.36 (m, 2H), 7.36 – 7.31 (m, 2H), 6.96 (s, 2H), 5.27 (dd, *J* = 8.4, 3.6 Hz, 1H), 4.87 (d, *J* = 8.4 Hz, 1H), 3.99 – 3.84 (m, 1H), 3.65 – 3.54 (m, 1H), 3.53 – 3.41 (m, 2H), 3.25 – 3.16 (m, 1H), 3.16 – 3.00 (m, 2H), 2.67 (s, 6H), 2.29 (s, 3H), 1.41 (s, 3H), 1.31 (d, *J* = 6.8 Hz, 3H), 0.43 (s, 3H). **<sup>13</sup>C NMR** (100 MHz, CDCl<sub>3</sub>)  $\delta$  145.8, 145.28, 145.26, 142.7, 140.96, 140.95, 140.7, 140.63, 140.60, 140.51, 140.49, 140.40, 140.38, 140.3, 140.03, 140.00, 139.94, 131.93, 131.0, 129.3, 129.14, 129.09, 128.73, 128.70, 127.5, 127.4, 127.3, 127.2, 127.1, 127.0, 126.9, 126.6, 126.3, 125.9, 111.9, 82.5 (d, *J* = 3.9 Hz), 82.3 (d, *J* = 21.3 Hz), 82.0, 81.3 (d, *J* = 8.8 Hz), 50.4 (d, *J* = 4.1 Hz), 47.8 (d, *J* = 23.2 Hz), 45.4 (d, *J* = 2.9 Hz), 38.8 (d, *J* = 14.3 Hz), 27.6, 25.5, 23.0, 20.9, 17.4 (d, *J* = 8.4 Hz). **<sup>31</sup>P NMR** (162 MHz, CDCl<sub>3</sub>)  $\delta$  137.7. **HRMS (ESI)** calcd for C<sub>69</sub>H<sub>66</sub>N<sub>2</sub>O<sub>6</sub>PS [M+H]<sup>+</sup> 1081.4379, found 1081.4391.

### Typical procedure for the preparation of diiodides <sup>1</sup>(Typical Procedure B)

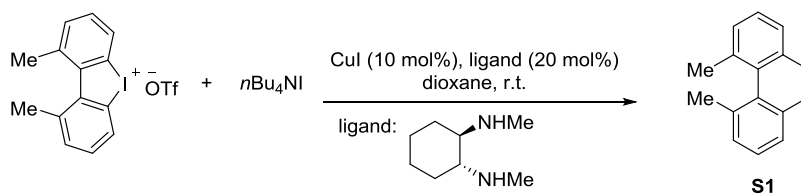

A mixture of dimethyl cyclic diaryliodonium<sup>2</sup> (2.980 g, 6.50 mmol, 1.0 equiv), tetrabutylammonium iodide (4.800 g, 13.00 mmol, 2.0 equiv), CuI (0.124 g, 0.65 mmol, 10 mol%), *trans*-N,N'-dimethylcyclohexane-1,2-diamine (0.185 g, 1.30 mmol, 20 mol%) in dioxane (15 mL) was stirred at room temperature for 24 hours. After complete consumption of starting material, the mixture was filtered through Celite and the filtrate was concentrated in vacuum and purified by flash column chromatography (PE/EtOAc = 95:5) on silica gel to afford **S1** (2.590 g, 92%). **<sup>1</sup>H NMR** (500 MHz, CDCl<sub>3</sub>)  $\delta$  7.81 (d, *J* = 7.9 Hz, 2H), 7.28 (d, *J* = 7.6 Hz, 2H), 7.00 (t, *J* = 7.8 Hz, 2H), 2.01 (s, 6H). **<sup>13</sup>C NMR** (126 MHz, CDCl<sub>3</sub>)  $\delta$  147.4, 137.5, 136.7, 130.0, 129.4, 100.6, 21.4. **HRMS (ESI)** calcd for C<sub>14</sub>H<sub>12</sub>I<sub>2</sub>Na [M+Na]<sup>+</sup> 456.8926, found 456.8897.

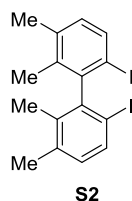

**S2** was prepared following the **Typical Procedure B**

The reaction of tetramethyl cyclic diaryliodonium<sup>2</sup> (4.380 g, 9.05 mmol, 1.0 equiv) and tetrabutylammonium iodide (6.690 g, 18.10 mmol, 2.0 equiv) afforded **S2** (3.747 g, 90%). <sup>1</sup>H NMR (400 MHz, CDCl<sub>3</sub>) δ 7.69 (d, *J* = 8.0 Hz, 2H), 6.91 (d, *J* = 8.0 Hz, 2H), 2.29 (s, 6H), 1.92 (s, 6H). <sup>13</sup>C NMR (100 MHz, CDCl<sub>3</sub>) δ 147.8, 137.1, 136.3, 136.0, 130.8, 97.5, 20.3, 17.8. HRMS (ESI) calcd for C<sub>16</sub>H<sub>16</sub>I<sub>2</sub>Na [M+Na]<sup>+</sup> 484.9239, found 484.9247.

### Typical procedure for the preparation of anhydrides<sup>3</sup> (Typical Procedure C)

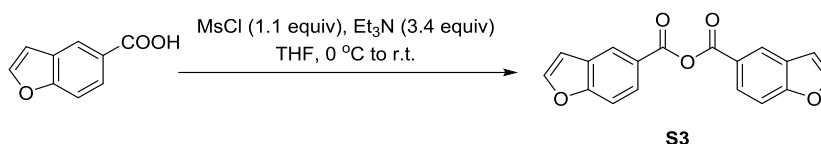

To a flask charged with benzofuran-5-carboxylic acid (0.972 g, 6.00 mmol, 2.0 equiv) and MsCl (0.26 mL, 3.30 mmol, 1.1 equiv) in THF (18 mL) at 0 °C was added a solution of Et<sub>3</sub>N (1.40 mL, 10.26 mmol, 3.4 equiv) in THF (36 mL) dropwise. The mixture was warmed to room temperature and stirred for 1 hour. Then the mixture was concentrated under vacuum, diluted with ethyl acetate and NaHCO<sub>3</sub>(aq.) and extracted with ethyl acetate for three times, and the combined organic layer was washed with brine, dried over Na<sub>2</sub>SO<sub>4</sub>, filtered and concentrated to afford the crude **S3** (0.933 g, 61%) without further purification. <sup>1</sup>H NMR (400 MHz, CDCl<sub>3</sub>) δ 8.49 (s, 2H), 8.16 (d, *J* = 8.4 Hz, 2H), 7.80 – 7.71 (m, 2H), 7.62 (d, *J* = 8.8 Hz, 2H), 6.94 – 6.84 (m, 2H). <sup>13</sup>C NMR (100 MHz, CDCl<sub>3</sub>) δ 162.7, 158.2, 146.8, 127.9, 127.0, 125.0, 123.8, 111.9, 107.2. HRMS (ESI) calcd for C<sub>18</sub>H<sub>10</sub>O<sub>5</sub>Na [M+Na]<sup>+</sup> 329.0426, found 329.0422.

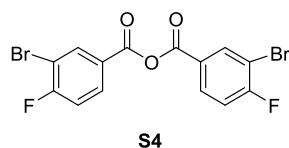

**S4** was prepared following the **Typical Procedure C**

The reaction of 3-bromo-4-fluorobenzoic acid (2.190 g, 10.00 mmol, 2.0 equiv) with MsCl (0.43 mL, 5.50 mmol, 1.1 equiv) afforded **S4** (0.735 g, 35%). <sup>1</sup>H NMR (400 MHz, CDCl<sub>3</sub>) δ 8.38 – 8.32 (m, 2H), 8.14 – 8.07 (m, 2H), 7.29 (d, *J* = 8.0 Hz, 2H). <sup>13</sup>C NMR (100 MHz, CDCl<sub>3</sub>) δ 163.2 (<sup>1</sup>*J*<sub>C-F</sub> = 259 Hz), 159.9, 136.4 (<sup>4</sup>*J*<sub>C-F</sub> = 2.1 Hz), 131.9 (<sup>3</sup>*J*<sub>C-F</sub> = 9.0 Hz), 126.0 (<sup>3</sup>*J*<sub>C-F</sub> = 3.5 Hz), 117.3 (<sup>2</sup>*J*<sub>C-F</sub> = 23.3 Hz), 110.2 (<sup>2</sup>*J*<sub>C-F</sub> = 22.1 Hz). <sup>19</sup>F NMR (376 MHz, CDCl<sub>3</sub>) δ -95.9. HRMS (ESI) calcd for C<sub>14</sub>H<sub>6</sub>Br<sub>2</sub>F<sub>2</sub>O<sub>3</sub>Na [M+Na]<sup>+</sup> 440.8549, found 440.8555.

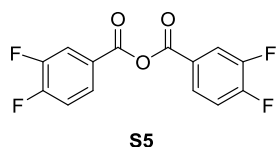

**S5** was prepared following the **Typical Procedure C**

The reaction of 3,4-difluorobenzoic acid (1.580 g, 10.00 mmol, 2.0 equiv) with MsCl (0.43 mL, 5.50 mmol, 1.1 equiv) afforded **S5** (0.960 g, 64%). <sup>1</sup>H NMR (400 MHz, CDCl<sub>3</sub>) δ 8.01 – 7.95 (m, 2H), 7.95 – 7.85 (m, 2H), 7.40 – 7.29 (m, 2H). <sup>13</sup>C NMR (100 MHz, CDCl<sub>3</sub>) δ 159.9, 154.8 (dd, *J*<sub>C-F</sub> = 261, 12.7 Hz), 150.4 (dd, *J*<sub>C-F</sub> = 253, 13.2 Hz), 127.8 (dd, *J*<sub>C-F</sub> = 7.8, 3.7 Hz), 125.4 (dd, *J*<sub>C-F</sub> = 5.6, 3.6 Hz), 119.9 (dd, *J*<sub>C-F</sub> = 19.0, 2.0 Hz), 118.2 (d, <sup>2</sup>*J*<sub>C-F</sub> = 18.3 Hz). <sup>19</sup>F NMR (376 MHz, CDCl<sub>3</sub>) δ -126.0, -134.7. **HRMS (ESI)** calcd for C<sub>14</sub>H<sub>6</sub>F<sub>4</sub>O<sub>3</sub>Na [M+Na]<sup>+</sup> 321.0151, found 321.0150.

### Typical procedure for the preparation of silafluorene (Typical Procedure D)

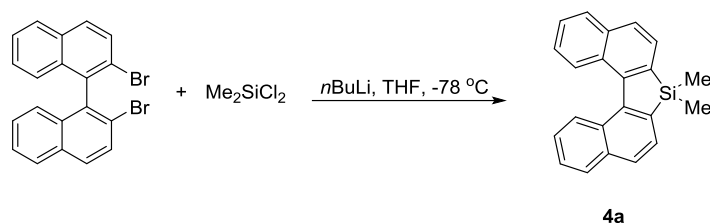

Under nitrogen atmosphere, to a mixture of 2,2'-dibromo-1,1'-binaphthalene (2.060 g, 5.00 mmol, 1.0 equiv) in THF (50 mL) was added *n*BuLi (2.4 M in hexanes, 4.8 mL, 11.50 mmol, 2.3 equiv) dropwise at -78 °C. After the mixture was stirred under the same temperature for 2 hours, a solution of dichlorodimethylsilane (0.73 mL, 7.50 mmol, 1.50 equiv) in THF (5 mL) was added dropwise. The resulting mixture was stirred for additional 12 hours at -78 °C before it was allowed to warm to room temperature. The mixture was quenched with water (10 mL) and extracted with ethyl acetate (15 mL\*3). The combined organic layer was washed with brine and dried with Na<sub>2</sub>SO<sub>4</sub>, concentrated and purified by flash column chromatography (PE/EtOAc = 99:1) on silica gel which was pretreated by Et<sub>3</sub>N to give the desired product **4a** (1.301 g, 84%). <sup>1</sup>H NMR (400 MHz, CDCl<sub>3</sub>) δ 8.01 (d, *J* = 8.8 Hz, 2H), 7.95 (d, *J* = 8.0 Hz, 2H), 7.90 (d, *J* = 7.6 Hz, 2H), 7.82 (d, *J* = 8.0 Hz, 2H), 7.52 (t, *J* = 7.4 Hz, 2H), 7.43 – 7.34 (m, 2H), 0.48 (s, 6H). <sup>13</sup>C NMR (100 MHz, CDCl<sub>3</sub>) δ 147.1, 139.9, 135.7, 129.7, 128.5, 128.3, 127.9, 127.8, 125.7, 124.3, -3.32. **HRMS (ESI)** calcd for C<sub>22</sub>H<sub>19</sub>Si [M+H]<sup>+</sup> 311.1256, found 311.1256.

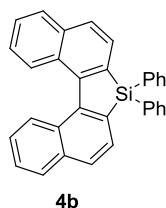

**4b** was prepared following the **Typical Procedure D**

The reaction of 2,2'-dibromo-1,1'-binaphthalene (4.121 g, 10.00 mmol, 1.0 equiv), *n*BuLi (2.4

M in hexanes, 9.6 mL, 23.00 mmol, 2.3 equiv) and dichlorodiphenylsilane (3.15 mL, 15.00 mmol, 1.5 equiv) afforded **4b** (3.201 g, 73%).  $^1\text{H NMR}$  (400 MHz,  $\text{CDCl}_3$ )  $\delta$  8.04 (d,  $J = 8.8$  Hz, 2H), 7.99 – 7.89 (m, 6H), 7.68 (d,  $J = 7.2$  Hz, 4H), 7.54 (t,  $J = 7.4$  Hz, 2H), 7.45 – 7.38 (m, 4H), 7.34 (t,  $J = 7.4$  Hz, 4H).  $^{13}\text{C NMR}$  (100 MHz,  $\text{CDCl}_3$ )  $\delta$  148.5, 136.8, 136.0, 135.6, 132.4, 130.2, 129.8, 129.3, 128.32, 128.26, 128.2, 128.0, 126.1, 124.4. **HRMS (ESI)** calcd for  $\text{C}_{32}\text{H}_{23}\text{Si}$   $[\text{M}+\text{H}]^+$  435.1569, found 435.1563.

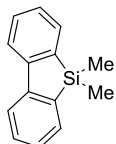

**4c**

**4c (known compound)**<sup>4</sup> was prepared following the **Typical Procedure D**

The reaction of 2,2'-dibromo-1,1'-biphenyl (1.560 g, 5.00 mmol, 1.0 equiv), *n*BuLi (2.4 M in hexanes, 4.4 mL, 10.50 mmol, 2.1 equiv) and dichlorodimethylsilane (0.97 mL, 10.00 mmol, 2.0 equiv) afforded **4c** (0.879 g, 84%).  $^1\text{H NMR}$  (500 MHz,  $\text{CDCl}_3$ )  $\delta$  7.83 (d,  $J = 7.5$  Hz, 2H), 7.64 (d,  $J = 7.0$  Hz, 2H), 7.44 (t,  $J = 7.5$  Hz, 2H), 7.31 – 7.27 (m, 2H), 0.43 (s, 6H).  $^{13}\text{C NMR}$  (126 MHz,  $\text{CDCl}_3$ )  $\delta$  148.4, 137.4, 134.6, 134.4, 133.3, 130.5, 129.8, 128.0, 127.6, 120.9, -5.1.

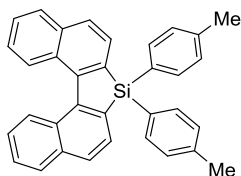

**4d**

**4d** was prepared following the **Typical Procedure D**

The reaction of 2,2'-dibromo-1,1'-binaphthalene (0.680 g, 1.65 mmol, 1.1 equiv), *n*BuLi (2.4 M in hexanes, 1.6 mL, 3.75 mmol, 2.5 equiv) and dimethoxydi-*p*-tolylsilane (0.408 g, 1.50 mmol, 1.0 equiv) afforded **4d** (0.434 g, 63%).  $^1\text{H NMR}$  (400 MHz,  $\text{CDCl}_3$ )  $\delta$  8.03 (d,  $J = 8.4$  Hz, 2H), 7.93 (t,  $J = 7.2$  Hz, 4H), 7.90 (d,  $J = 7.6$  Hz, 2H), 7.57 (d,  $J = 8.0$  Hz, 4H), 7.53 (t,  $J = 7.6$  Hz, 2H), 7.40 (t,  $J = 7.6$  Hz, 2H), 7.17 (d,  $J = 7.6$  Hz, 4H), 2.34 (s, 6H).  $^{13}\text{C NMR}$  (100 MHz,  $\text{CDCl}_3$ )  $\delta$  148.4, 140.3, 137.3, 136.0, 135.6, 129.8, 129.4, 129.0, 128.8, 128.3, 128.2, 128.0, 126.0, 124.3, 21.6. **HRMS (ESI)** calcd for  $\text{C}_{34}\text{H}_{27}\text{Si}$   $[\text{M}+\text{H}]^+$  463.1882, found 463.1880.

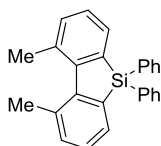

**4e**

**4e** was prepared following the **Typical Procedure D**

The reaction of 2,2'-diiodo-6,6'-dimethyl-1,1'-biphenyl (0.651 g, 1.50 mmol, 1.0 equiv), *n*BuLi (2.4 M in hexanes, 1.40 mL, 3.45 mmol, 2.3 equiv) and dichlorodiphenylsilane (0.48 mL, 2.25 mmol, 1.5 equiv) afforded **4e** (0.163 g, 30%).  $^1\text{H NMR}$  (500 MHz,  $\text{CDCl}_3$ )  $\delta$  7.62 (d,  $J = 7.0$  Hz,

2H), 7.59 (d,  $J = 7.0$  Hz, 4H), 7.38 (t,  $J = 7.3$  Hz, 2H), 7.31 (t,  $J = 7.0$  Hz, 6H), 7.25 – 7.23 (m, 2H), 2.40 (s, 6H).  $^{13}\text{C}$  NMR (126 MHz,  $\text{CDCl}_3$ )  $\delta$  149.7, 138.2, 135.4, 134.0, 133.8, 133.5, 131.1, 129.9, 128.0, 126.9, 22.7. **HRMS (ESI)** calcd for  $\text{C}_{26}\text{H}_{23}\text{Si}$   $[\text{M}+\text{H}]^+$  363.1569, found 363.1570.

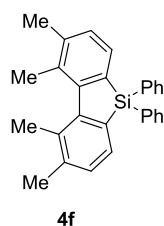

**4f** was prepared following the **Typical Procedure D**

The reaction of 6,6'-diiodo-2,2',3,3'-tetramethyl-1,1'-biphenyl (1.620 g, 3.50 mmol, 1.0 equiv),  $n\text{BuLi}$  (2.4 M in hexanes, 3.40 mL, 8.05 mmol, 2.3 equiv) and dichlorodiphenylsilane (1.10 mL, 5.25 mmol, 1.5 equiv) afforded **4f** (0.167 g, 12%).  $^1\text{H}$  NMR (500 MHz,  $\text{CDCl}_3$ )  $\delta$  7.64 – 7.58 (m, 4H), 7.54 (d,  $J = 7.0$  Hz, 2H), 7.37 (t,  $J = 7.3$  Hz, 2H), 7.31 (t,  $J = 7.3$  Hz, 4H), 7.14 (d,  $J = 7.0$  Hz, 2H), 2.36 (s, 6H), 2.26 (s, 6H).  $^{13}\text{C}$  NMR (126 MHz,  $\text{CDCl}_3$ )  $\delta$  150.6, 140.4, 135.6, 135.4, 134.1, 133.3, 130.8, 129.8, 128.6, 127.9, 20.6, 20.0. **HRMS (ESI)** calcd for  $\text{C}_{28}\text{H}_{27}\text{Si}$   $[\text{M}+\text{H}]^+$  391.1882, found 391.1877.

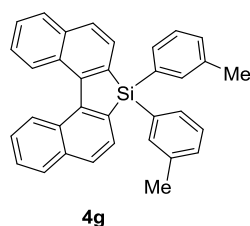

**4g** was prepared following the **Typical Procedure D**

The reaction of 2,2'-dibromo-1,1'-binaphthalene (0.618 g, 1.50 mmol, 1.0 equiv),  $n\text{BuLi}$  (2.4 M in hexanes, 1.40 mL, 3.45 mmol, 2.3 equiv) and dichlorodi(*m*-tolyl)silane (0.506 g, 1.80 mmol, 1.2 equiv) afforded **4g** (0.208 g, 30%).  $^1\text{H}$  NMR (400 MHz,  $\text{CDCl}_3$ )  $\delta$  8.02 (d,  $J = 8.8$  Hz, 2H), 7.94 (d,  $J = 8.0$  Hz, 4H), 7.90 (d,  $J = 7.6$  Hz, 2H), 7.56 – 7.50 (m, 2H), 7.50 – 7.44 (m, 4H), 7.43 – 7.35 (m, 2H), 7.26 – 7.18 (m, 4H), 2.28 (s, 6H).  $^{13}\text{C}$  NMR (100 MHz,  $\text{CDCl}_3$ )  $\delta$  148.4, 137.6, 137.0, 136.02, 135.98, 132.7, 132.3, 131.1, 129.8, 129.4, 128.3, 128.2, 128.0, 126.0, 124.3, 21.5. **HRMS (ESI)** calcd for  $\text{C}_{34}\text{H}_{27}\text{Si}$   $[\text{M}+\text{H}]^+$  463.1882, found 463.1886.

### Typical procedure for the preparation of silafluorene (Typical Procedure E)

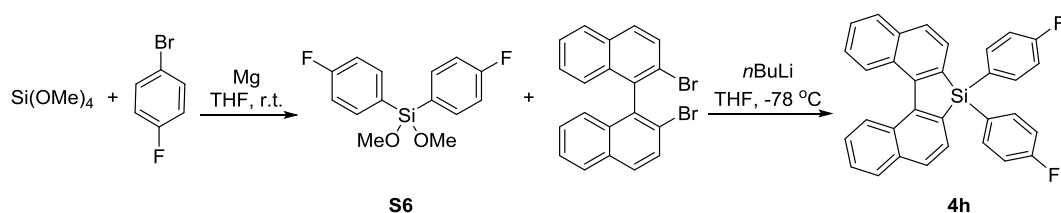

To an oven-dried flask charged with magnesium powder (0.225 g, 9.38 mmol, 2.5 equiv) and a

piece of iodine was added 1/3 amount of solution of 1-bromo-4-fluorobenzene (1.320 g, 7.50 mmol, 2.0 equiv) in THF (5 mL) to initiate the reaction. After initiation, the rest of the solution was added dropwise. After stirring at room temperature for 30 minutes, a solution of tetramethyl silicate (0.571 g, 3.75 mmol, 1.0 equiv) in THF (2 mL) was added dropwise and stirred for additional 30 minutes. The mixture was filtered via syringe and the filtrate was used directly without further purification.

To the mixture of 2,2'-dibromo-1,1'-binaphthalene (1.030 g, 2.50 mmol, 0.7 equiv) in THF (50 mL) was added *n*BuLi (2.4 M in hexanes, 2.20 mL, 5.25 mmol, 1.4 equiv) dropwise at -78 °C. After stirring at the same temperature for 2 hours, a solution of bis(4-fluorophenyl)dimethoxysilane (**S6**) in THF was added dropwise. The mixture was stirred for additional 12 hours at -78 °C before it was allowed to warm to room temperature. The reaction was quenched with water (10 mL), the resulting mixture was extracted with ethyl acetate (15 mL\*3). The combined organic layer was washed with brine and dried with Na<sub>2</sub>SO<sub>4</sub>, concentrated and purified by flash column chromatography (PE/EtOAc = 99:1) on silica gel which was pretreated by Et<sub>3</sub>N to give the desired product **4h** (0.599 g, 51%). **<sup>1</sup>H NMR** (400 MHz, CDCl<sub>3</sub>) δ 8.02 (d, *J* = 8.4 Hz, 2H), 7.94 (t, *J* = 9.2 Hz, 4H), 7.88 (d, *J* = 7.6 Hz, 2H), 7.62 (t, *J* = 7.2 Hz, 4H), 7.55 (t, *J* = 7.4 Hz, 2H), 7.41 (t, *J* = 7.6 Hz, 2H), 7.05 (t, *J* = 8.8 Hz, 4H). **<sup>13</sup>C NMR** (100 MHz, CDCl<sub>3</sub>) δ 164.5 (d, <sup>1</sup>*J*<sub>C-F</sub> = 249 Hz), 148.6, 137.6 (d, <sup>3</sup>*J*<sub>C-F</sub> = 5.7 Hz), 136.2, 136.1, 129.8, 129.0, 128.5, 128.4, 128.0, 127.7 (d, <sup>4</sup>*J*<sub>C-F</sub> = 3.8 Hz), 126.3, 124.6, 115.6 (d, <sup>2</sup>*J*<sub>C-F</sub> = 19.9 Hz). **<sup>19</sup>F NMR** (376 MHz, CDCl<sub>3</sub>) δ -109.4. **HRMS (ESI)** calcd for C<sub>32</sub>H<sub>21</sub>F<sub>2</sub>Si [M+H]<sup>+</sup> 471.1381, found 471.1376.

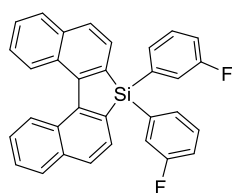

**4i**

**4i** was prepared following the **Typical Procedure E**

The reaction of 2,2'-dibromo-1,1'-binaphthalene (1.030 g, 2.50 mmol, 0.7 equiv), tetramethyl silicate (0.571 g, 3.75 mmol, 1.0 equiv) and 1-bromo-3-fluorobenzene (1.320 g, 7.50 mmol, 2.0 equiv) afforded **4i** (0.448 g, 38%). **<sup>1</sup>H NMR** (500 MHz, CDCl<sub>3</sub>) δ 8.05 (d, *J* = 8.5 Hz, 2H), 7.98 (d, *J* = 5.0 Hz, 2H), 7.97 – 7.92 (m, 4H), 7.59 – 7.55 (m, 2H), 7.47 – 7.42 (m, 4H), 7.38 (dd, *J* = 8.5, 3.0 Hz, 2H), 7.34 (dd, *J* = 7.5, 5.5 Hz, 2H), 7.15 – 7.10 (m, 2H). **<sup>13</sup>C NMR** (126 MHz, CDCl<sub>3</sub>) δ 162.6 (d, <sup>1</sup>*J*<sub>C-F</sub> = 250.0 Hz), 148.8, 136.1, 135.3, 134.9 (d, <sup>3</sup>*J*<sub>C-F</sub> = 4.3 Hz), 131.1 (d, <sup>4</sup>*J*<sub>C-F</sub> = 3.2 Hz), 130.2 (d, <sup>3</sup>*J*<sub>C-F</sub> = 7.1 Hz), 129.8, 129.0, 128.6, 128.4, 128.0, 126.4, 124.7, 121.8 (d, <sup>2</sup>*J*<sub>C-F</sub> = 19.3 Hz), 117.5 (d, <sup>2</sup>*J*<sub>C-F</sub> = 21.0 Hz). **<sup>19</sup>F NMR** (471 MHz, CDCl<sub>3</sub>) δ -112.4. **HRMS (ESI)** calcd for C<sub>32</sub>H<sub>21</sub>F<sub>2</sub>Si [M+H]<sup>+</sup> 471.1381, found 471.1380.

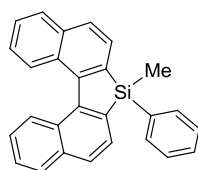

**4j**

#### **4j** was prepared following the **Typical Procedure D**

The reaction of 2,2'-dibromo-1,1'-binaphthalene (0.618 g, 1.50 mmol, 1.0 equiv), *n*BuLi (2.4 M in hexanes, 1.40 mL, 3.45 mmol, 2.3 equiv) and dichloro(methyl)(phenyl)silane (0.344 g, 1.80 mmol, 1.2 equiv) afforded **4j** (0.415 g, 74%). <sup>1</sup>H NMR (500 MHz, CDCl<sub>3</sub>) δ 8.02 (d, *J* = 8.5 Hz, 2H), 7.94 (t, *J* = 8.5 Hz, 2H), 7.89 (d, *J* = 7.5 Hz, 1H), 7.87 (d, *J* = 7.5 Hz, 1H), 7.82 (d, *J* = 7.5 Hz, 1H), 7.79 (d, *J* = 7.5 Hz, 1H), 7.55 – 7.52 (m, 1H), 7.52– 7.51 (m, 1H), 7.51 – 7.49 (m, 2H), 7.42 – 7.37 (m, 2H), 7.35 (d, *J* = 7.5 Hz, 1H), 7.32 – 7.27 (m, 2H), 0.79 (s, 3H). <sup>13</sup>C NMR (126 MHz, CDCl<sub>3</sub>) δ 148.1, 147.9, 138.6, 138.2, 135.91, 135.86, 134.5, 134.3, 130.0, 129.8, 129.7, 129.0, 128.8, 128.3, 128.08, 128.05, 128.0, 127.9, 125.94, 125.92, 124.4, 124.3, -5.3. HRMS (ESI) calcd for C<sub>27</sub>H<sub>21</sub>Si [M+H]<sup>+</sup> 373.1413, found 373.1411.

### **Typical procedure for Rh-catalyzed ring-opening/acylation reaction (Typical**

#### **Procedure F)**

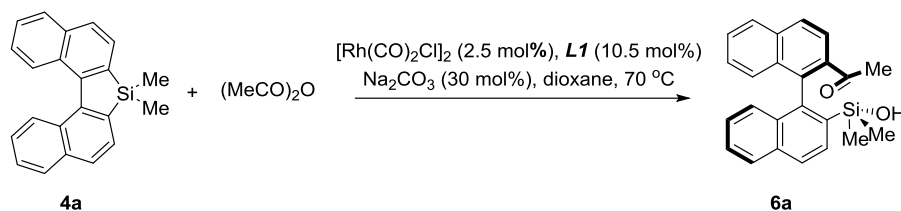

Under nitrogen atmosphere, to a Schleck tube was added [Rh(CO)<sub>2</sub>Cl]<sub>2</sub> (2.0 mg, 0.005 mmol, 2.5 mol%), **L1** (24.5 mg, 0.021 mmol, 10.5 mol%) and dioxane (2 mL) at room temperature and was stirred for 30 minutes. The solution was transfer via cannula carefully to another Schlenk tube charged with **4a** (62 mg, 0.200 mmol, 1.0 equiv), acetic anhydride (28 μL, 0.300 mmol, 1.5 equiv), Na<sub>2</sub>CO<sub>3</sub> (6.4 mg, 0.060 mmol, 30 mol%) and dioxane (2 mL). The tube was capped with a screw cap and stirred at 70 °C for 24 h. After being cooled to room temperature, the mixture was filtered through Celite and the filtrate was concentrated in vacuum and purified by flash column chromatography (PE/EtOAc = 90:10) on silica gel to afford **6a** (73 mg, 98%, 90% ee). [α]<sub>D</sub><sup>20</sup> – 2.25 (c 1.13, CH<sub>2</sub>Cl<sub>2</sub>). HPLC conditions: Chiralcel AD-H, isopropanol/hexane = 10:90, flow: 1.0 mL/min, λ = 254 nm. <sup>1</sup>H NMR (500 MHz, CDCl<sub>3</sub>) δ 8.04 (d, *J* = 9.0 Hz, 1H), 7.99 (d, *J* = 8.0 Hz, 1H), 7.94 (d, *J* = 8.5 Hz, 1H), 7.92 (d, *J* = 8.5 Hz, 1H), 7.87 (d, *J* = 8.0 Hz, 1H), 7.80 (d, *J* = 9.0 Hz, 1H), 7.55 – 7.50 (m, 1H), 7.49 – 7.44 (m, 1H), 7.31 – 7.26 (m, 1H), 7.26 – 7.22 (m, 1H), 7.17 (d, *J* = 8.5 Hz, 1H), 7.13 (d, *J* = 8.5 Hz, 1H), 2.70 (s, 1H), 1.94 (s, 3H), 0.13 (s, 3H), -0.47 (s, 3H). <sup>13</sup>C NMR (126 MHz, CDCl<sub>3</sub>) δ 205.2, 141.5, 138.3, 137.9, 137.4, 134.2, 133.7, 133.5, 132.7, 130.4, 128.7, 128.2, 128.0, 127.6, 127.5, 127.0, 126.6, 126.5, 126.2, 123.9, 30.5, 0.6. HRMS (ESI) calcd for C<sub>24</sub>H<sub>22</sub>O<sub>2</sub>SiNa [M+Na]<sup>+</sup> 393.1287, found 393.1288.

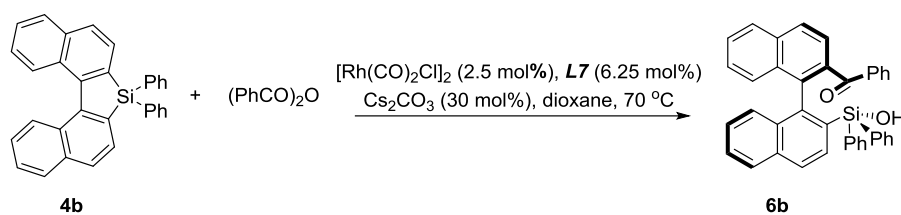

Compound **6b** was prepared following the **Typical Procedure F**

The reaction of **4b** (87 mg, 0.20 mmol) and benzoic anhydride (68 mg, 0.30 mmol) with  $[\text{Rh}(\text{CO})_2\text{Cl}]_2$  (2.0 mg, 0.005 mmol, 2.5 mol%), **L7** (14.6 mg, 0.013 mmol, 6.25 mol%) afforded **6b** (100 mg, 90%, 91% ee).  $[\alpha]_D^{20} - 45.31$  (c 1.05,  $\text{CH}_2\text{Cl}_2$ ). HPLC conditions: Chiralcel AD-H, isopropanol/hexane = 20:80, flow: 1.0 mL/min,  $\lambda = 254$  nm.  $^1\text{H NMR}$  (400 MHz,  $\text{CDCl}_3$ )  $\delta$  7.88 (d,  $J = 8.4$  Hz, 1H), 7.82 – 7.77 (m, 2H), 7.74 (d,  $J = 4.8$  Hz, 1H), 7.73 – 7.69 (m, 2H), 7.66 – 7.60 (m, 3H), 7.52 (d,  $J = 8.4$  Hz, 1H), 7.45 – 7.40 (m, 2H), 7.40 – 7.34 (m, 2H), 7.34 – 7.27 (m, 2H), 7.20 (t,  $J = 7.8$  Hz, 2H), 7.11 – 7.06 (m, 2H), 7.05 – 7.01 (m, 2H), 7.01 – 6.95 (m, 1H), 6.93 – 6.86 (m, 1H), 6.85 – 6.78 (m, 3H), 5.33 (bs, 1H).  $^{13}\text{C NMR}$  (100 MHz,  $\text{CDCl}_3$ )  $\delta$  200.8, 142.0, 137.4, 136.73, 136.66, 136.3, 136.0, 135.2, 134.5, 133.7, 133.6, 133.5, 133.4, 132.9, 132.5, 132.0, 130.5, 129.5, 128.5, 127.9, 127.84, 127.82, 127.7, 127.5, 127.0, 126.9, 126.8, 126.6, 126.5, 126.3, 125.7, 124.0. **HRMS (ESI)** calcd for  $\text{C}_{39}\text{H}_{28}\text{O}_2\text{SiNa}$   $[\text{M}+\text{Na}]^+$  579.1756, found 579.1752.

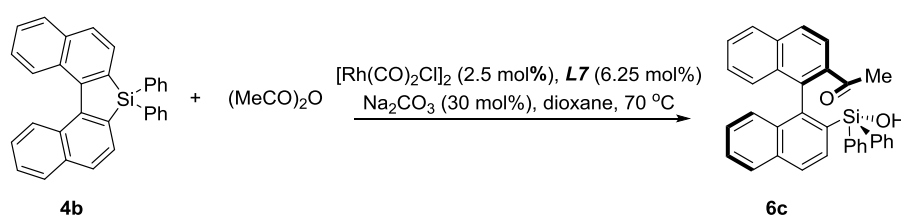

Compound **6c** was prepared following the **Typical Procedure F**

The reaction of **4b** (87 mg, 0.20 mmol) and acetic anhydride (28  $\mu\text{L}$ , 0.30 mmol) with  $[\text{Rh}(\text{CO})_2\text{Cl}]_2$  (2.0 mg, 0.005 mmol, 2.5 mol%), **L7** (14.6 mg, 0.013 mmol, 6.25 mol%) afforded **6c** (97 mg, 98%, 92% ee).  $[\alpha]_D^{20} + 17.60$  (c 0.98,  $\text{CH}_2\text{Cl}_2$ ). HPLC conditions: Chiralcel AD-H, isopropanol/hexane = 15:85, flow: 1.0 mL/min,  $\lambda = 254$  nm.  $^1\text{H NMR}$  (400 MHz,  $\text{CDCl}_3$ )  $\delta$  7.92 – 7.88 (m, 2H), 7.86 (d,  $J = 8.4$  Hz, 1H), 7.71 (d,  $J = 8.4$  Hz, 1H), 7.68 (d,  $J = 8.4$  Hz, 1H), 7.65 (d,  $J = 8.4$  Hz, 1H), 7.61 (t,  $J = 1.4$  Hz, 1H), 7.61 – 7.59 (m, 1H), 7.49 – 7.44 (m, 1H), 7.42 – 7.37 (m, 1H), 7.36 – 7.33 (m, 2H), 7.33 – 7.30 (m, 1H), 7.25 – 7.19 (m, 1H), 7.09 – 7.06 (m, 2H), 7.06 – 7.01 (m, 2H), 6.99 – 6.93 (m, 1H), 6.92 – 6.89 (m, 2H), 6.89 – 6.85 (m, 1H), 3.43 (s, 1H), 1.99 (s, 3H).  $^{13}\text{C NMR}$  (100 MHz,  $\text{CDCl}_3$ )  $\delta$  205.8, 143.2, 138.0, 136.5, 135.8, 134.9, 134.7, 134.4, 133.9, 133.8, 133.7, 132.9, 132.8, 132.2, 129.6, 128.9, 128.8, 128.1, 128.0, 127.7, 127.6, 127.2, 127.1, 127.0, 126.8, 126.6, 126.5, 126.2, 123.2, 30.4. **HRMS (ESI)** calcd for  $\text{C}_{34}\text{H}_{26}\text{O}_2\text{SiNa}$   $[\text{M}+\text{Na}]^+$  517.1600, found 517.1600.

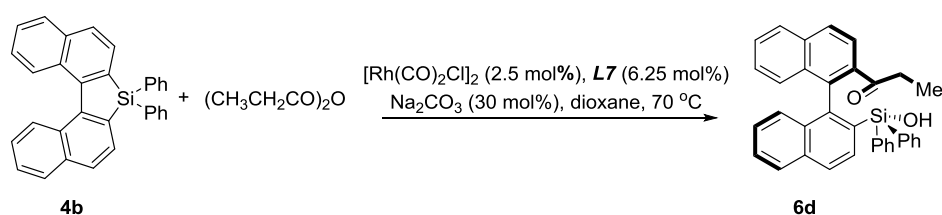



Compound **6d** was prepared following the **Typical Procedure F**

The reaction of **4b** (87 mg, 0.20 mmol) and propionic anhydride (28  $\mu$ L, 0.30 mmol) with  $[\text{Rh}(\text{CO})_2\text{Cl}]_2$  (2.0 mg, 0.005 mmol, 2.5 mol%), **L7** (14.6 mg, 0.013 mmol, 6.25 mol%) afforded **6d** (97 mg, 98%, 92% ee).  $[\alpha]_D^{20} + 19.33$  (c 0.97,  $\text{CH}_2\text{Cl}_2$ ). HPLC conditions: Chiralcel AD-H, isopropanol/hexane = 15:85, flow: 1.0 mL/min,  $\lambda = 254$  nm.  $^1\text{H NMR}$  (400 MHz,  $\text{CDCl}_3$ )  $\delta$  7.92 – 7.87 (m, 2H), 7.86 (d,  $J = 8.4$  Hz, 1H), 7.73 – 7.68 (m, 2H), 7.68 – 7.64 (m, 2H), 7.59 (d,  $J = 8.8$  Hz, 1H), 7.46 (t,  $J = 7.4$  Hz, 1H), 7.42 – 7.37 (m, 2H), 7.37 – 7.34 (m, 1H), 7.31 (t,  $J = 7.6$  Hz, 1H), 7.22 (t,  $J = 7.8$  Hz, 1H), 7.08 (d,  $J = 8.8$  Hz, 2H), 7.05 – 6.98 (m, 2H), 6.94 (t,  $J = 7.8$  Hz, 1H), 6.87 (t,  $J = 7.8$  Hz, 3H), 4.07 (s, 1H), 2.55 – 2.41 (m, 1H), 2.39 – 2.22 (m, 1H), 0.76 (t,  $J = 7.0$  Hz, 3H).  $^{13}\text{C NMR}$  (100 MHz,  $\text{CDCl}_3$ )  $\delta$  209.7, 143.0, 138.4, 136.1, 135.8, 135.0, 134.9, 134.4, 133.9, 133.6, 133.5, 132.81, 132.78, 132.2, 129.6, 128.73, 128.71, 128.2, 127.8, 127.7, 127.5, 127.1, 126.9, 126.7, 126.5, 126.3, 126.2, 122.7, 36.1, 7.9. **HRMS (ESI)** calcd for  $\text{C}_{35}\text{H}_{28}\text{O}_2\text{SiNa}$   $[\text{M}+\text{Na}]^+$  531.1756, found 531.1757.

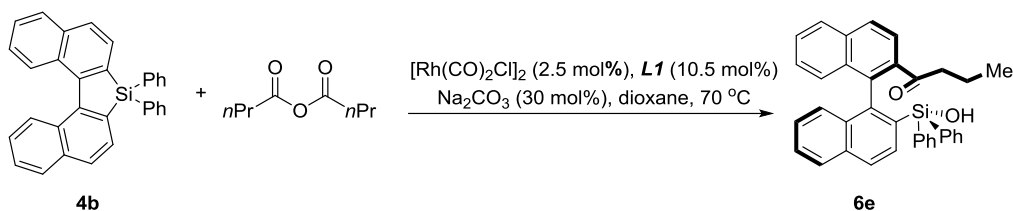

Compound **6e** was prepared following the **Typical Procedure F**

The reaction of **4b** (87 mg, 0.20 mmol) and butyric anhydride (49  $\mu$ L, 0.30 mmol) with  $[\text{Rh}(\text{CO})_2\text{Cl}]_2$  (2.0 mg, 0.005 mmol, 2.5 mol%), **L1** (18.9 mg, 0.021 mmol, 10.5 mol%) afforded **6e** (61 mg, 59%, 85% ee).  $[\alpha]_D^{20} + 14.26$  (c 1.00,  $\text{CH}_2\text{Cl}_2$ ). HPLC conditions: Chiralcel AD-H, isopropanol/hexane = 10:90, flow: 1.0 mL/min,  $\lambda = 254$  nm.  $^1\text{H NMR}$  (400 MHz,  $\text{CDCl}_3$ )  $\delta$  7.88 (d,  $J = 7.6$  Hz, 1H), 7.85 (d,  $J = 7.2$  Hz, 2H), 7.72 – 7.68 (m, 2H), 7.68 – 7.64 (m, 2H), 7.54 (d,  $J = 8.4$  Hz, 1H), 7.45 (t,  $J = 7.6$  Hz, 1H), 7.42 – 7.36 (m, 2H), 7.36 – 7.33 (m, 1H), 7.29 (t,  $J = 7.6$  Hz, 1H), 7.22 (t,  $J = 7.6$  Hz, 1H), 7.07 (d,  $J = 8.8$  Hz, 1H), 7.02 (d,  $J = 7.6$  Hz, 2H), 6.98 (d,  $J = 7.6$  Hz, 1H), 6.92 (t,  $J = 7.6$  Hz, 1H), 6.84 (d,  $J = 8.0$  Hz, 2H), 6.83 – 6.71 (m, 1H), 4.27 (s, 1H), 2.41 (dt,  $J = 17.6, 7.0$  Hz, 1H), 2.26 (dt,  $J = 17.6, 7.0$  Hz, 1H), 1.36 – 1.20 (m, 2H), 0.44 (t,  $J = 7.4$  Hz, 3H).  $^{13}\text{C NMR}$  (100 MHz,  $\text{CDCl}_3$ )  $\delta$  210.0, 142.8, 138.9, 136.2, 135.5, 135.40, 135.0, 134.4, 133.9, 133.6, 133.4, 132.8, 132.7, 132.2, 129.6, 128.72, 128.68, 128.1, 127.8, 127.7, 127.5, 127.1, 126.84, 126.82, 126.7, 126.5, 126.33, 126.27, 122.5, 44.8, 16.9, 13.1. **HRMS (ESI)** calcd for  $\text{C}_{36}\text{H}_{30}\text{O}_2\text{SiNa}$   $[\text{M}+\text{Na}]^+$  545.1913, found 545.1906.

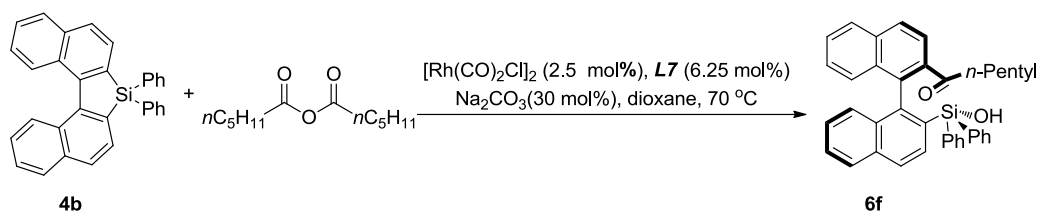

Compound **6f** was prepared following the **Typical Procedure F**

The reaction of **4b** (87 mg, 0.20 mmol) and hexanoic anhydride (69  $\mu$ L, 0.30 mmol) with  $[\text{Rh}(\text{CO})_2\text{Cl}]_2$  (2.0 mg, 0.005 mmol, 2.5 mol%), **L7** (14.6 mg, 0.013 mmol, 6.25 mol%) afforded

**6f** (49 mg, 45%, 86% ee).  $[\alpha]_D^{20} + 8.33$  (c 0.93, CH<sub>2</sub>Cl<sub>2</sub>). HPLC conditions: Chiralcel AD-H, isopropanol/hexane = 10:90, flow: 1.0 mL/min,  $\lambda = 254$  nm. <sup>1</sup>H NMR (400 MHz, CDCl<sub>3</sub>)  $\delta$  7.88 (d,  $J = 7.6$  Hz, 1H), 7.85 (d,  $J = 7.2$  Hz, 1H), 7.71 – 7.67 (m, 2H), 7.67 – 7.63 (m, 2H), 7.53 (d,  $J = 8.8$  Hz, 1H), 7.45 (t,  $J = 7.2$  Hz, 1H), 7.43 – 7.37 (m, 2H), 7.35 (d,  $J = 6.8$  Hz, 2H), 7.29 (t,  $J = 7.6$  Hz, 1H), 7.21 (t,  $J = 7.6$  Hz, 1H), 7.07 (d,  $J = 8.4$  Hz, 1H), 7.02 (d,  $J = 7.2$  Hz, 2H), 6.97 (d,  $J = 7.6$  Hz, 1H), 6.92 (t,  $J = 8.0$  Hz, 1H), 6.84 (d,  $J = 8.0$  Hz, 2H), 6.83 – 6.80 (m, 1H), 4.27 (s, 1H), 2.48 – 2.34 (m, 1H), 2.34 – 2.22 (m, 1H), 1.28 – 1.14 (m, 2H), 1.00 – 0.88 (m, 2H), 0.81 – 0.70 (m, 2H), 0.68 (t,  $J = 7.2$  Hz, 3H). <sup>13</sup>C NMR (100 MHz, CDCl<sub>3</sub>)  $\delta$  210.2, 142.8, 139.0, 136.2, 135.5, 135.0, 134.4, 133.9, 133.6, 133.4, 132.8, 132.7, 132.2, 129.6, 128.73, 128.68, 128.1, 127.8, 127.7, 127.5, 127.1, 126.9, 126.8, 126.7, 126.5, 126.4, 126.3, 122.5, 42.9, 34.8, 23.1, 22.1, 13.8. HRMS (ESI) calcd for C<sub>38</sub>H<sub>34</sub>O<sub>2</sub>SiNa [M+Na]<sup>+</sup> 573.2226, found 573.2219.

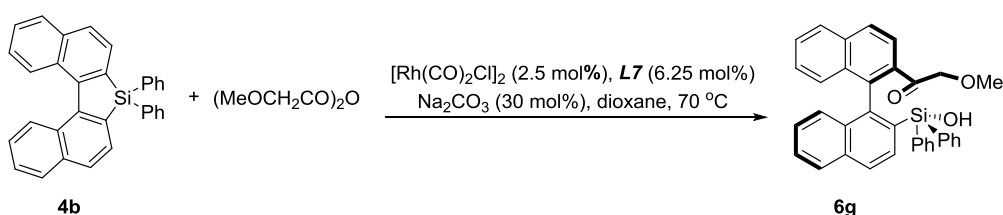

Compound **6g** was prepared following the **Typical Procedure F**

The reaction of **4b** (87 mg, 0.20 mmol) and 2-methoxyacetic anhydride (49 mg, 0.30 mmol) with [Rh(CO)<sub>2</sub>Cl]<sub>2</sub> (2.0 mg, 0.005 mmol, 2.5 mol%), **L7** (14.6 mg, 0.013 mmol, 6.25 mol%) afforded **6g** (97 mg, 93%, 88% ee).  $[\alpha]_D^{20} + 16.34$  (c 0.98, CH<sub>2</sub>Cl<sub>2</sub>). HPLC conditions: Chiralcel AD-H, isopropanol/hexane = 20:80, flow: 1.0 mL/min,  $\lambda = 254$  nm. <sup>1</sup>H NMR (400 MHz, CDCl<sub>3</sub>)  $\delta$  7.89 (d,  $J = 8.4$  Hz, 2H), 7.88 (d,  $J = 8.4$  Hz, 1H), 7.73 (d,  $J = 8.0$  Hz, 1H), 7.68 (d,  $J = 8.0$  Hz, 1H), 7.66 – 7.61 (m, 2H), 7.60 (d,  $J = 8.4$  Hz, 1H), 7.49 – 7.43 (m, 1H), 7.43 – 7.38 (m, 1H), 7.38 – 7.34 (m, 2H), 7.34 – 7.30 (m, 1H), 7.25 – 7.20 (m, 1H), 7.09 – 7.05 (m, 2H), 7.05 – 7.00 (m, 2H), 6.97 – 6.91 (m, 1H), 6.91 – 6.88 (m, 2H), 6.88 – 6.84 (m, 1H), 4.01 (d,  $J = 17.6$  Hz, 1H), 3.78 (d,  $J = 17.6$  Hz, 1H), 3.72 (bs, 1H), 2.95 (s, 3H). <sup>13</sup>C NMR (126 MHz, DMSO-d<sub>6</sub>)  $\delta$  198.2, 143.2, 137.2, 136.3, 135.4, 133.7, 133.6, 133.5, 133.3, 133.2, 132.8, 132.34, 132.33, 131.4, 128.6, 128.2, 127.7, 127.4, 127.2, 127.0, 126.7, 126.6, 126.3, 126.2, 125.9, 125.8, 125.6, 125.5, 123.4, 75.4, 57.5. HRMS (ESI) calcd for C<sub>35</sub>H<sub>28</sub>O<sub>3</sub>SiNa [M+Na]<sup>+</sup> 547.1705, found 547.1699.

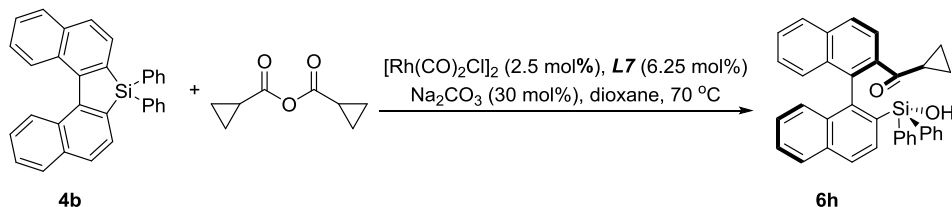

Compound **6h** was prepared following the **Typical Procedure F**

The reaction of **4b** (87 mg, 0.20 mmol) and cyclopropanecarboxylic anhydride (46 mg, 0.30 mmol) with [Rh(CO)<sub>2</sub>Cl]<sub>2</sub> (2.0 mg, 0.005 mmol, 2.5 mol%), **L7** (14.6 mg, 0.013 mmol, 6.25 mol%) afforded **6h** (84 mg, 81%, 85% ee).  $[\alpha]_D^{20} + 40.51$  (c 0.98, CH<sub>2</sub>Cl<sub>2</sub>). HPLC conditions: Chiralcel AD-H, isopropanol/hexane = 20:80, flow: 1.0 mL/min,  $\lambda = 254$  nm. <sup>1</sup>H NMR (500 MHz, CDCl<sub>3</sub>)  $\delta$  7.88 (d,  $J = 8.5$  Hz, 1H), 7.84 (d,  $J = 8.5$  Hz, 2H), 7.72 – 7.68 (m, 2H), 7.68 – 7.64 (m,

2H), 7.63 (d,  $J = 8.5$  Hz, 1H), 7.45 (t,  $J = 7.3$  Hz, 1H), 7.40 – 7.38 (m, 1H), 7.38 – 7.33 (m, 2H), 7.29 (t,  $J = 7.5$  Hz, 1H), 7.24 – 7.20 (m, 1H), 7.16 (d,  $J = 8.5$  Hz, 1H), 7.02 – 6.97 (m, 2H), 6.94 (t,  $J = 7.5$  Hz, 2H), 6.89 (d,  $J = 8.5$  Hz, 1H), 6.79 (t,  $J = 7.5$  Hz, 2H), 4.38 (s, 1H), 1.96 – 1.79 (m, 1H), 1.15 – 1.03 (m, 1H), 0.76 – 0.60 (m, 1H), 0.48 – 0.32 (m, 1H), 0.21 – 0.12 (m, 1H).  $^{13}\text{C}$  NMR (126 MHz,  $\text{CDCl}_3$ )  $\delta$  210.5, 143.2, 139.9, 136.3, 135.6, 135.5, 135.0, 134.3, 133.8, 133.5, 133.4, 133.1, 132.6, 132.4, 129.5, 128.8, 128.6, 128.0, 127.8, 127.7, 127.6, 127.1, 126.8, 126.6, 126.50, 126.46, 126.2, 122.7, 22.4, 13.5, 12.5. HRMS (ESI) calcd for  $\text{C}_{36}\text{H}_{28}\text{O}_2\text{SiNa}$   $[\text{M}+\text{Na}]^+$  543.1756, found 543.1759.

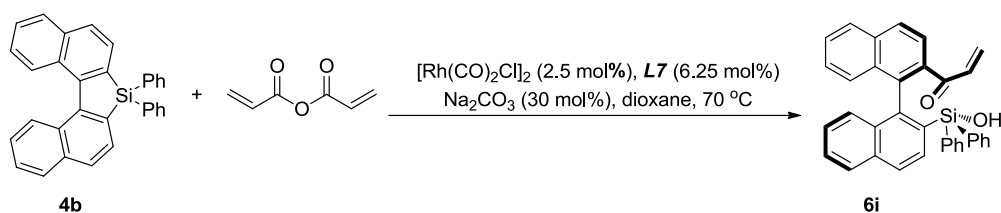

Compound **6i** was prepared following the **Typical Procedure F**

The reaction of **4b** (87 mg, 0.20 mmol) and acrylic anhydride (36  $\mu\text{L}$ , 0.30 mmol) with  $[\text{Rh}(\text{CO})_2\text{Cl}]_2$  (2.0 mg, 0.005 mmol, 2.5 mol%), **L7** (14.6 mg, 0.013 mmol, 6.25 mol%) afforded **6i** (83 mg, 82%, 93% ee).  $[\alpha]_D^{20} + 12.12$  (c 0.96,  $\text{CH}_2\text{Cl}_2$ ). HPLC conditions: Chiralcel AD-H, isopropanol/hexane = 15:85, flow: 1.0 mL/min,  $\lambda = 254$  nm.  $^1\text{H}$  NMR (500 MHz,  $\text{CDCl}_3$ )  $\delta$  7.89 – 7.85 (m, 1H), 7.84 (d,  $J = 4.5$  Hz, 2H), 7.73 – 7.71 (m, 1H), 7.71 – 7.69 (m, 2H), 7.66 (d,  $J = 8.0$  Hz, 1H), 7.56 (d,  $J = 8.5$  Hz, 1H), 7.45 – 7.39 (m, 2H), 7.39 – 7.37 (m, 1H), 7.37 – 7.34 (m, 1H), 7.34 – 7.29 (m, 1H), 7.21 – 7.14 (m, 1H), 7.08 – 7.03 (m, 2H), 7.03 – 6.97 (m, 2H), 6.95 – 6.88 (m, 1H), 6.87 – 6.85 (m, 1H), 6.85 – 6.84 (m, 1H), 6.84 – 6.82 (m, 1H), 6.27 (dd,  $J = 17.5, 10.5$  Hz, 1H), 5.99 (dd,  $J = 17.5, 1.0$  Hz, 1H), 5.68 (dd,  $J = 10.5, 1.0$  Hz, 1H), 4.52 (s, 1H).  $^{13}\text{C}$  NMR (126 MHz,  $\text{CDCl}_3$ )  $\delta$  199.5, 142.3, 137.1, 136.7, 136.4, 135.72, 135.69, 135.0, 134.4, 133.9, 133.6, 132.8, 132.72, 132.69, 132.1, 129.5, 128.7, 128.3, 128.1, 127.8, 127.7, 127.6, 127.1, 127.0, 126.9, 126.6, 126.50, 126.45, 126.1, 123.5. HRMS (ESI) calcd for  $\text{C}_{35}\text{H}_{26}\text{O}_2\text{SiNa}$   $[\text{M}+\text{Na}]^+$  529.1600, found 529.1597.

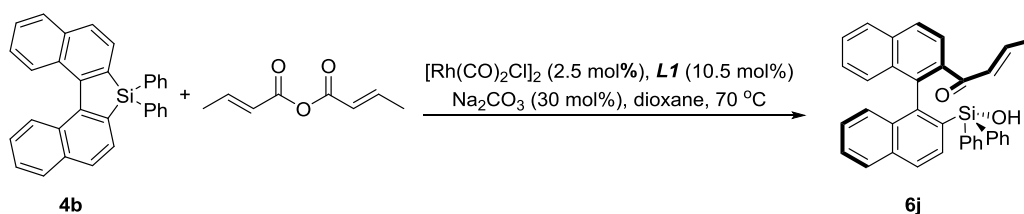

Compound **6j** was prepared following the **Typical Procedure F**

The reaction of **4b** (87 mg, 0.20 mmol) and (*E*)-but-2-enoic anhydride (45  $\mu\text{L}$ , 0.30 mmol) with  $[\text{Rh}(\text{CO})_2\text{Cl}]_2$  (2.0 mg, 0.005 mmol, 2.5 mol%), **L1** (18.9 mg, 0.021 mmol, 10.5 mol%) afforded **6j** (104 mg, 99%, 85% ee).  $[\alpha]_D^{20} - 0.41$  (c 1.00,  $\text{CH}_2\text{Cl}_2$ ). HPLC conditions: Chiralcel AD-H, isopropanol/hexane = 20:80, flow: 1.0 mL/min,  $\lambda = 254$  nm.  $^1\text{H}$  NMR (400 MHz,  $\text{CDCl}_3$ )  $\delta$  7.89 – 7.85 (m, 1H), 7.85 – 7.80 (m, 2H), 7.76 – 7.72 (m, 2H), 7.70 (d,  $J = 8.4$  Hz, 1H), 7.63 (d,  $J = 8.0$  Hz, 1H), 7.50 (d,  $J = 8.4$  Hz, 1H), 7.45 – 7.41 (m, 1H), 7.41 – 7.38 (m, 2H), 7.38 – 7.34 (m, 1H), 7.29 (d,  $J = 7.6$  Hz, 1H), 7.16 (t,  $J = 7.6$  Hz, 1H), 7.07 – 7.03 (m, 1H), 7.03 – 6.99 (m, 2H), 6.99 – 6.93 (m, 1H),

6.91 – 6.84 (m, 1H), 6.84 – 6.81 (m, 2H), 6.81 – 6.77 (m, 1H), 6.63 – 6.51 (m, 1H), 5.99 (d,  $J = 15.6$  Hz, 1H), 5.18 (s, 1H), 1.56 (d,  $J = 6.8$  Hz, 3H).  $^{13}\text{C NMR}$  (100 MHz,  $\text{CDCl}_3$ )  $\delta$  200.3, 149.8, 142.3, 137.5, 136.6, 136.3, 135.9, 135.1, 134.4, 133.9, 133.6, 133.3, 132.68, 132.65, 132.3, 131.8, 129.5, 128.5, 128.2, 128.1, 127.7, 127.6, 127.5, 127.0, 126.8, 126.7, 126.64, 126.62, 126.43, 126.38, 125.8, 123.3, 18.3. **HRMS (ESI)** calcd for  $\text{C}_{36}\text{H}_{28}\text{O}_2\text{SiNa}$   $[\text{M}+\text{Na}]^+$  543.1756, found 543.1754.

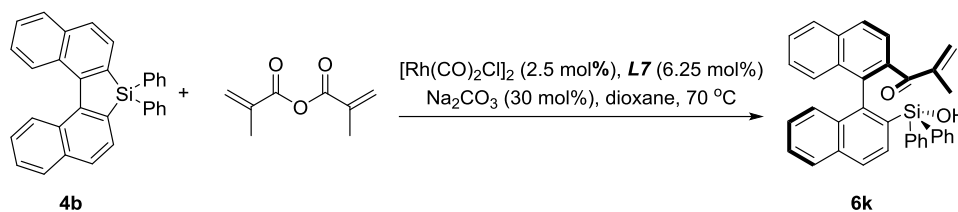

Compound **6k** was prepared following the **Typical Procedure F**

The reaction of **4b** (87 mg, 0.20 mmol) and methacrylic anhydride (45  $\mu\text{L}$ , 0.30 mmol) with  $[\text{Rh}(\text{CO})_2\text{Cl}]_2$  (2.0 mg, 0.005 mmol, 2.5 mol%), **L7** (14.6 mg, 0.013 mmol, 6.25 mol%) afforded **6k** (69 mg, 66%, 92% ee).  $[\alpha]_D^{20} + 10.04$  (c 1.00,  $\text{CH}_2\text{Cl}_2$ ). HPLC conditions: Chiralcel AD-H, isopropanol/hexane = 20:80, flow: 1.0 mL/min,  $\lambda = 230$  nm.  $^1\text{H NMR}$  (400 MHz,  $\text{CDCl}_3$ )  $\delta$  7.88 – 7.84 (m, 1H), 7.84 – 7.80 (m, 2H), 7.80 – 7.75 (m, 2H), 7.71 (d,  $J = 8.4$  Hz, 1H), 7.64 (d,  $J = 8.4$  Hz, 1H), 7.47 (d,  $J = 8.4$  Hz, 1H), 7.44 – 7.41 (m, 2H), 7.41 – 7.35 (m, 2H), 7.32 – 7.27 (m, 1H), 7.14 (t,  $J = 7.8$  Hz, 1H), 7.05 – 7.00 (m, 2H), 7.00 – 6.95 (m, 2H), 6.88 – 6.84 (m, 1H), 6.84 – 6.79 (m, 2H), 6.76 (d,  $J = 8.8$  Hz, 1H), 5.70 (s, 1H), 5.61 (s, 1H), 5.37 (s, 1H), 1.59 (s, 3H).  $^{13}\text{C NMR}$  (100 MHz,  $\text{CDCl}_3$ )  $\delta$  203.3, 143.9, 142.1, 137.1, 136.8, 136.4, 136.1, 135.1, 134.4, 133.8, 133.6, 133.2, 132.65, 132.55, 132.1, 132.0, 129.5, 128.5, 128.0, 127.74, 127.70, 127.6, 127.4, 127.0, 126.9, 126.8, 126.6, 126.4, 126.3, 125.8, 123.7, 16.8. **HRMS (ESI)** calcd for  $\text{C}_{36}\text{H}_{28}\text{O}_2\text{SiNa}$   $[\text{M}+\text{Na}]^+$  543.1756, found 543.1758.

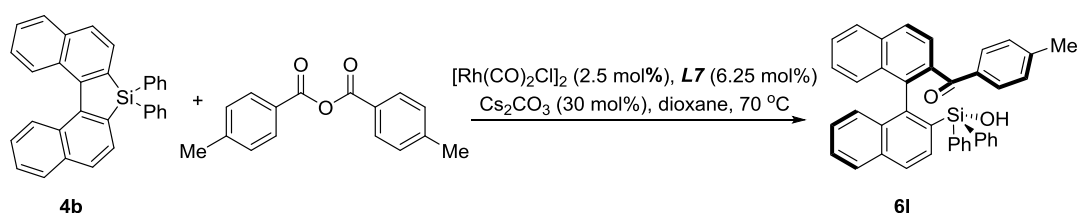

Compound **6l** was prepared following the **Typical Procedure F**

The reaction of **4b** (87 mg, 0.20 mmol) and 4-methylbenzoic anhydride (76 mg, 0.30 mmol) with  $[\text{Rh}(\text{CO})_2\text{Cl}]_2$  (2.0 mg, 0.005 mmol, 2.5 mol%), **L7** (14.6 mg, 0.013 mmol, 6.25 mol%) afforded **6l** (63 mg, 55%, 88% ee).  $[\alpha]_D^{20} - 88.03$  (c 1.04,  $\text{CH}_2\text{Cl}_2$ ). HPLC conditions: Chiralcel AD-H, isopropanol/hexane = 20:80, flow: 1.0 mL/min,  $\lambda = 254$  nm.  $^1\text{H NMR}$  (400 MHz,  $\text{CDCl}_3$ )  $\delta$  7.86 (d,  $J = 8.4$  Hz, 1H), 7.82 – 7.79 (m, 1H), 7.79 – 7.76 (m, 1H), 7.74 (d,  $J = 8.4$  Hz, 1H), 7.71 (d,  $J = 8.0$  Hz, 2H), 7.62 (d,  $J = 8.0$  Hz, 1H), 7.57 – 7.52 (m, 2H), 7.50 (d,  $J = 8.4$  Hz, 1H), 7.45 – 7.40 (m, 2H), 7.40 – 7.35 (m, 1H), 7.31 – 7.26 (m, 2H), 7.10 – 7.05 (m, 2H), 7.05 – 7.02 (m, 2H), 7.02 – 6.99 (m, 2H), 6.99 – 6.93 (m, 1H), 6.89 – 6.84 (m, 1H), 6.83 – 6.78 (m, 2H), 6.78 – 6.75 (m, 1H), 5.59 (s, 1H), 2.28 (s, 3H).  $^{13}\text{C NMR}$  (100 MHz,  $\text{CDCl}_3$ )  $\delta$  200.3, 144.6, 142.0, 137.3, 136.82, 136.77, 136.0, 135.2, 134.5, 133.8, 133.7, 133.5, 133.4, 133.0, 132.5, 132.0, 130.8, 129.5, 128.7, 128.5, 127.84, 127.81, 127.7, 127.5, 126.9, 126.8, 126.6, 126.4, 126.3, 125.7, 124.1, 21.7. **HRMS**

(ESI) calcd for  $C_{40}H_{30}O_2SiNa$   $[M+Na]^+$  593.1914, found 593.1913.

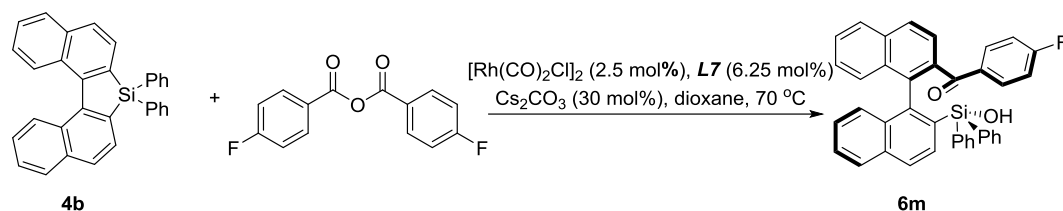

Compound **6m** was prepared following the **Typical Procedure F**

The reaction of **4b** (87 mg, 0.20 mmol) and 4-fluorobenzoic anhydride (79 mg, 0.30 mmol) with  $[Rh(CO)_2Cl]_2$  (2.0 mg, 0.005 mmol, 2.5 mol%), **L7** (14.6 mg, 0.013 mmol, 6.25 mol%) afforded **6m** (76 mg, 67%, 92% ee).  $[\alpha]_D^{20} - 67.08$  (c 1.01,  $CH_2Cl_2$ ). HPLC conditions: Chiralcel AD-H, isopropanol/hexane = 20:80, flow: 1.0 mL/min,  $\lambda = 254$  nm.  **$^1H$  NMR** (400 MHz,  $CDCl_3$ )  $\delta$  7.88 (d,  $J = 8.4$  Hz, 1H), 7.78 – 7.76 (m, 1H), 7.76 – 7.74 (m, 2H), 7.74 – 7.70 (m, 2H), 7.66 – 7.64 (m, 1H), 7.64 – 7.59 (m, 2H), 7.50 (d,  $J = 8.4$  Hz, 1H), 7.44 – 7.38 (m, 2H), 7.38 – 7.35 (m, 1H), 7.34 – 7.31 (m, 1H), 7.31 – 7.27 (m, 1H), 7.11 – 7.05 (m, 2H), 7.05 – 7.01 (m, 2H), 7.00 – 6.95 (m, 1H), 6.94 – 6.88 (m, 1H), 6.88 – 6.85 (m, 1H), 6.85 – 6.83 (m, 2H), 6.83 – 6.79 (m, 2H), 5.15 (s, 1H).  **$^{13}C$  NMR** (100 MHz,  $CDCl_3$ )  $\delta$  199.3, 165.8 (d,  $^1J_{C-F} = 254.7$  Hz), 141.9, 137.5, 136.6, 136.4, 135.9, 135.1, 134.4, 133.7, 133.6, 133.5, 133.2, 133.1, 132.9, 132.7 (d,  $^4J_{C-F} = 2.8$  Hz), 132.5, 132.0, 129.5, 128.6, 128.0 (d,  $^3J_{C-F} = 4.7$  Hz), 127.8, 127.7, 127.6, 127.1, 127.0, 126.8, 126.6, 126.5, 126.4, 125.8, 123.8, 115.1 (d,  $^2J_{C-F} = 21.8$  Hz).  **$^{19}F$  NMR** (471 MHz,  $CDCl_3$ )  $\delta$  -103.9. **HRMS (ESI)** calcd for  $C_{39}H_{27}FO_2SiNa$   $[M+Na]^+$  597.1662, found 597.1672.

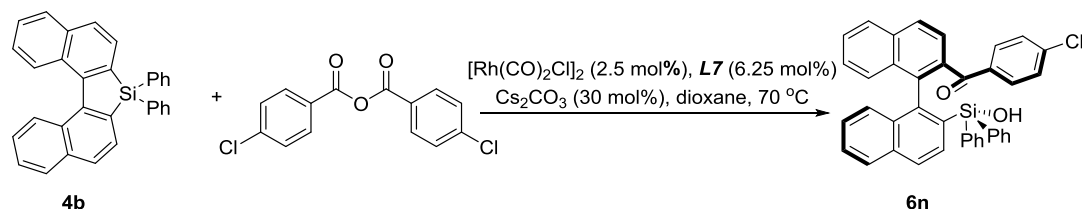

Compound **6n** was prepared following the **Typical Procedure F**

The reaction of **4b** (87 mg, 0.20 mmol) and 4-chlorobenzoic anhydride (89 mg, 0.30 mmol) with  $[Rh(CO)_2Cl]_2$  (2.0 mg, 0.005 mmol, 2.5 mol%), **L7** (14.6 mg, 0.013 mmol, 6.25 mol%) afforded **6n** (114 mg, 96%, 88% ee).  $[\alpha]_D^{20} - 98.06$  (c 1.00,  $CH_2Cl_2$ ). HPLC conditions: Chiralcel AD-H, isopropanol/hexane = 20:80, flow: 1.0 mL/min,  $\lambda = 274$  nm.  **$^1H$  NMR** (400 MHz,  $CDCl_3$ )  $\delta$  7.89 (d,  $J = 8.4$  Hz, 1H), 7.78 – 7.75 (m, 2H), 7.75 – 7.74 (m, 2H), 7.74 – 7.71 (m, 1H), 7.62 (d,  $J = 8.4$  Hz, 1H), 7.54 (d,  $J = 8.4$  Hz, 2H), 7.50 (d,  $J = 8.4$  Hz, 1H), 7.45 – 7.38 (m, 2H), 7.38 – 7.36 (m, 1H), 7.36 – 7.29 (m, 2H), 7.14 (d,  $J = 8.4$  Hz, 2H), 7.12 – 7.06 (m, 2H), 7.04 (d,  $J = 7.6$  Hz, 2H), 6.99 (t,  $J = 7.4$  Hz, 1H), 6.93 (t,  $J = 7.6$  Hz, 1H), 6.90 – 6.86 (m, 1H), 6.83 (t,  $J = 7.4$  Hz, 2H), 4.97 (s, 1H).  **$^{13}C$  NMR** (100 MHz,  $CDCl_3$ )  $\delta$  199.5, 141.7, 139.8, 137.7, 136.5, 136.3, 135.9, 135.1, 134.7, 134.5, 133.7, 133.6, 133.5, 132.9, 132.5, 132.0, 131.7, 129.6, 128.6, 128.2, 128.00, 127.97, 127.8, 127.7, 127.6, 127.1, 126.8, 126.6, 126.5, 126.4, 125.9, 123.8. **HRMS (ESI)** calcd for  $C_{39}H_{27}ClO_2SiNa$   $[M+Na]^+$  613.1367, found 613.1360.

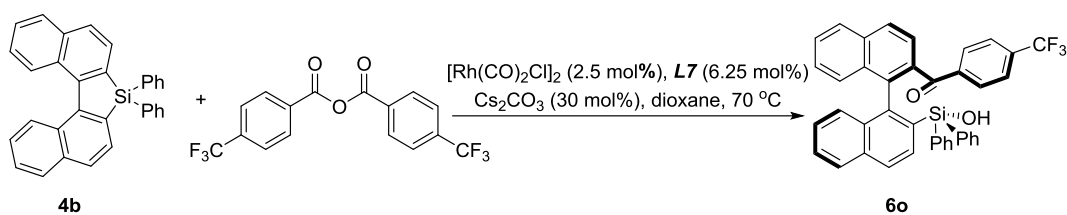

Compound **6o** was prepared following the **Typical Procedure F**

The reaction of **4b** (87 mg, 0.20 mmol) and 4-(trifluoromethyl)benzoic anhydride (109 mg, 0.30 mmol) with  $[\text{Rh}(\text{CO})_2\text{Cl}]_2$  (2.0 mg, 0.005 mmol, 2.5 mol%), **L7** (14.6 mg, 0.013 mmol, 6.25 mol%) afforded **6o** (109 mg, 87%, 87% ee).  $[\alpha]_D^{20} - 61.55$  (c 1.05,  $\text{CH}_2\text{Cl}_2$ ). HPLC conditions: Chiralcel AD-H, isopropanol/hexane = 20:80, flow: 1.0 mL/min,  $\lambda = 254$  nm.  **$^1\text{H}$  NMR** (500 MHz,  $\text{CDCl}_3$ )  $\delta$  7.90 (d,  $J = 8.0$  Hz, 1H), 7.77 (d,  $J = 8.0$  Hz, 1H), 7.75 – 7.72 (m, 2H), 7.72 – 7.68 (m, 2H), 7.61 (d,  $J = 8.5$  Hz, 1H), 7.58 (d,  $J = 8.0$  Hz, 2H), 7.54 (d,  $J = 8.5$  Hz, 1H), 7.43 – 7.38 (m, 2H), 7.38 – 7.36 (m, 2H), 7.35 – 7.33 (m, 2H), 7.33 – 7.30 (m, 1H), 7.14 – 7.10 (m, 1H), 7.10 – 7.06 (m, 1H), 7.06 – 7.03 (m, 2H), 7.03 – 6.98 (m, 2H), 6.98 – 6.95 (m, 1H), 6.85 (t,  $J = 7.5$  Hz, 2H), 4.33 (s, 1H).  **$^{13}\text{C}$  NMR** (126 MHz,  $\text{CDCl}_3$ )  $\delta$  200.0, 142.0, 139.4, 138.3, 136.3, 136.2, 135.7, 135.0, 134.5, 133.84 (q,  $J = 32.6$  Hz) 133.75, 133.6, 132.8, 132.6, 132.0, 130.0, 129.7, 128.8, 128.2, 128.0, 127.9, 127.7, 127.3, 127.2, 126.9, 126.8, 126.6, 126.5, 126.0, 124.7 (q,  $J = 3.7$  Hz), 124.0, 121.2 (q,  $J = 273.3$  Hz).  **$^{19}\text{F}$  NMR** (471 MHz,  $\text{CDCl}_3$ )  $\delta$  -63.2. **HRMS (ESI)** calcd for  $\text{C}_{40}\text{H}_{27}\text{F}_3\text{O}_2\text{SiNa}$   $[\text{M}+\text{Na}]^+$  647.1630, found 647.1639.

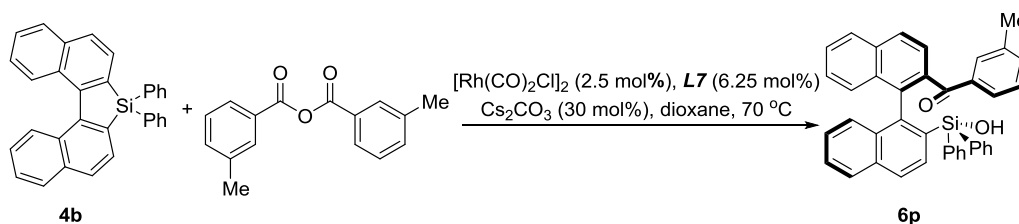

Compound **6p** was prepared following the **Typical Procedure F**

The reaction of **4b** (87 mg, 0.20 mmol) and 3-methylbenzoic anhydride (76 mg, 0.30 mmol) with  $[\text{Rh}(\text{CO})_2\text{Cl}]_2$  (2.0 mg, 0.005 mmol, 2.5 mol%), **L7** (14.6 mg, 0.013 mmol, 6.25 mol%) afforded **6p** (58 mg, 52%, 89% ee).  $[\alpha]_D^{20} - 74.96$  (c 1.10,  $\text{CH}_2\text{Cl}_2$ ). HPLC conditions: Chiralcel AD-H, isopropanol/hexane = 20:80, flow: 1.0 mL/min,  $\lambda = 254$  nm.  **$^1\text{H}$  NMR** (500 MHz,  $\text{CDCl}_3$ )  $\delta$  7.90 (d,  $J = 8.5$  Hz, 1H), 7.84 – 7.82 (m, 1H), 7.82 – 7.80 (m, 1H), 7.75 (d,  $J = 8.0$  Hz, 2H), 7.71 (d,  $J = 8.0$  Hz, 1H), 7.64 (d,  $J = 8.0$  Hz, 1H), 7.53 (d,  $J = 8.5$  Hz, 1H), 7.46 – 7.43 (m, 2H), 7.43 – 7.42 (m, 2H), 7.42 – 7.39 (m, 1H), 7.34 – 7.30 (m, 1H), 7.30 – 7.27 (m, 1H), 7.17 (d,  $J = 7.5$  Hz, 1H), 7.14 – 7.11 (m, 1H), 7.11 – 7.09 (m, 1H), 7.09 – 7.07 (m, 1H), 7.07 – 7.04 (m, 2H), 6.99 (t,  $J = 7.5$  Hz, 1H), 6.93 – 6.87 (m, 1H), 6.86 – 6.83 (m, 2H), 6.83 – 6.81 (m, 1H), 5.47 (bs, 1H), 2.21 (s, 3H).  **$^{13}\text{C}$  NMR** (126 MHz,  $\text{CDCl}_3$ )  $\delta$  201.2, 142.0, 137.6, 137.2, 137.0, 136.8, 136.3, 136.0, 135.1, 134.5, 134.2, 133.7, 133.6, 133.4, 132.8, 132.5, 132.0, 131.0, 129.5, 128.5, 127.84, 127.83, 127.78, 127.7, 127.5, 127.0, 126.80, 126.77, 126.7, 126.4, 126.3, 125.5, 124.0, 21.1. **HRMS (ESI)** calcd for  $\text{C}_{40}\text{H}_{30}\text{O}_2\text{SiNa}$   $[\text{M}+\text{Na}]^+$  593.1913, found 593.1918.

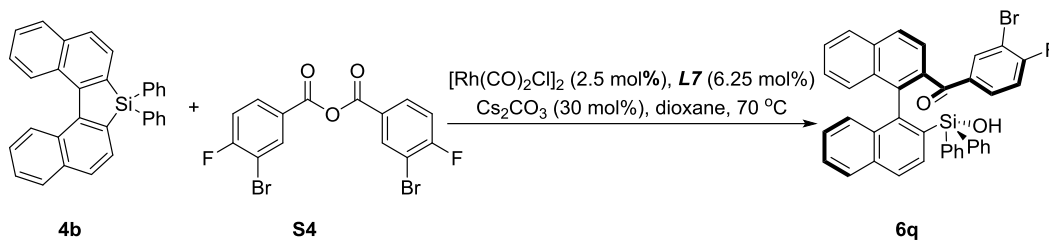

Compound **6q** was prepared following the **Typical Procedure F**

The reaction of **4b** (87 mg, 0.20 mmol) and **S4** (126 mg, 0.30 mmol) with  $[\text{Rh}(\text{CO})_2\text{Cl}]_2$  (2.0 mg, 0.005 mmol, 2.5 mol%), **L7** (14.6 mg, 0.013 mmol, 6.25 mol%) afforded **6q** (75 mg, 58%, 95% ee).  $[\alpha]_D^{20} - 100.42$  (c 0.94,  $\text{CH}_2\text{Cl}_2$ ). HPLC conditions: Chiralcel AD-H, isopropanol/hexane = 20:80, flow: 1.0 mL/min,  $\lambda = 254$  nm.  $^1\text{H NMR}$  (500 MHz,  $\text{CDCl}_3$ )  $\delta$  7.92 (d,  $J = 8.5$  Hz, 1H), 7.77 (d,  $J = 8.5$  Hz, 1H), 7.76 – 7.73 (m, 2H), 7.73 – 7.72 (s, 2H), 7.72 – 7.70 (m, 1H), 7.61 (d,  $J = 8.0$  Hz, 1H), 7.53 – 7.47 (m, 2H), 7.44 – 7.38 (m, 2H), 7.38 – 7.34 (m, 2H), 7.34 – 7.30 (m, 1H), 7.15 (t,  $J = 7.8$  Hz, 1H), 7.07 – 7.04 (m, 1H), 7.04 – 7.01 (m, 2H), 6.99 (d,  $J = 7.5$  Hz, 1H), 6.96 (t,  $J = 7.8$  Hz, 1H), 6.91 (d,  $J = 8.5$  Hz, 1H), 6.88 – 6.84 (m, 2H), 6.84 – 6.80 (m, 1H), 4.64 (s, 1H).  $^{13}\text{C NMR}$  (126 MHz,  $\text{CDCl}_3$ )  $\delta$  198.4, 161.8 (d,  $^1J_{\text{C-F}} = 255.1$  Hz), 141.8, 137.8, 136.4, 136.1, 135.91, 135.90, 135.8, 135.0, 134.5, 133.99, 133.96, 133.6 (d,  $^3J_{\text{C-F}} = 3.3$  Hz), 132.8, 132.5, 132.0, 131.2, 131.1, 129.6, 128.7, 128.3, 128.0, 127.8, 127.7 (d,  $^4J_{\text{C-F}} = 3.0$  Hz), 127.21, 127.19, 126.9, 126.8, 126.6, 126.5, 126.0, 123.5, 115.9 (d,  $^2J_{\text{C-F}} = 23.2$  Hz), 109.0 (d,  $^2J_{\text{C-F}} = 21.9$  Hz).  $^{19}\text{F NMR}$  (471 MHz,  $\text{CDCl}_3$ )  $\delta$  - 98.8. **HRMS (ESI)** calcd for  $\text{C}_{39}\text{H}_{26}\text{BrFO}_2\text{SiNa}$   $[\text{M}+\text{Na}]^+$  675.0767, found 675.0760.

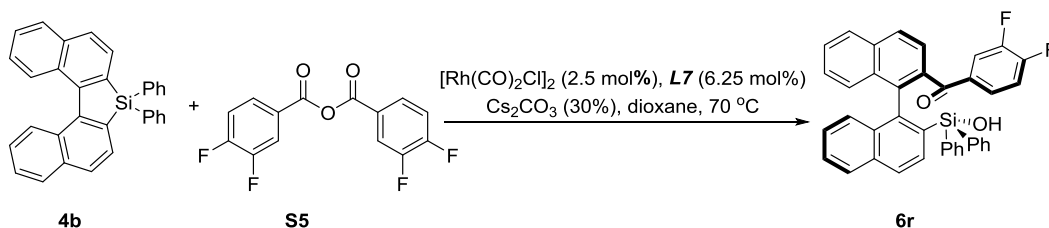

Compound **6r** was prepared following the **Typical Procedure F**

The reaction of **4b** (87 mg, 0.20 mmol) and **S5** (90 mg, 0.30 mmol) with  $[\text{Rh}(\text{CO})_2\text{Cl}]_2$  (2.0 mg, 0.005 mmol, 2.5 mol%), **L7** (14.6 mg, 0.013 mmol, 6.25 mol%) afforded **6r** (102 mg, 86%, 94% ee).  $[\alpha]_D^{20} - 61.38$  (c 0.99,  $\text{CH}_2\text{Cl}_2$ ). HPLC conditions: Chiralcel AD-H, isopropanol/hexane = 20:80, flow: 1.0 mL/min,  $\lambda = 254$  nm.  $^1\text{H NMR}$  (500 MHz,  $\text{CDCl}_3$ )  $\delta$  7.90 (d,  $J = 8.0$  Hz, 1H), 7.78 – 7.75 (m, 1H), 7.75 – 7.73 (m, 2H), 7.73 – 7.68 (m, 2H), 7.61 (d,  $J = 8.5$  Hz, 1H), 7.50 (d,  $J = 8.5$  Hz, 1H), 7.43 – 7.39 (m, 2H), 7.39 – 7.36 (m, 2H), 7.36 – 7.33 (m, 2H), 7.33 – 7.30 (m, 1H), 7.14 – 7.09 (m, 1H), 7.07 – 7.04 (m, 2H), 7.04 – 7.02 (m, 1H), 7.02 – 6.98 (m, 1H), 6.98 – 6.93 (m, 1H), 6.93 – 6.88 (m, 2H), 6.84 (t,  $J = 7.5$  Hz, 2H), 4.67 (s, 1H).  $^{13}\text{C NMR}$  (126 MHz,  $\text{CDCl}_3$ )  $\delta$  198.3, 153.6 (dd,  $J_{\text{C-F}} = 258.8, 13.1$  Hz), 149.7 (dd,  $J_{\text{C-F}} = 251.6, 10.3$  Hz), 141.8, 137.8, 136.3, 136.0, 135.8, 135.1, 134.5, 133.7, 133.63, 133.60, 133.4, 132.8, 132.5, 132.0, 129.6, 128.7, 128.2, 128.0, 127.8, 127.7, 127.6, 127.5 (dd,  $J_{\text{C-F}} = 7.3, 3.3$  Hz), 127.22, 127.16, 126.9, 126.8, 126.53, 126.49, 125.9, 123.6, 119.2 (dd,  $J_{\text{C-F}} = 16.8$  Hz), 116.8 (d,  $^2J_{\text{C-F}} = 17.9$  Hz).  $^{19}\text{F NMR}$  (471 MHz,  $\text{CDCl}_3$ )  $\delta$  - 128.8 (d), - 136.2 (d). **HRMS (ESI)** calcd for  $\text{C}_{39}\text{H}_{26}\text{F}_2\text{O}_2\text{SiNa}$   $[\text{M}+\text{Na}]^+$  615.1568, found 615.1575.

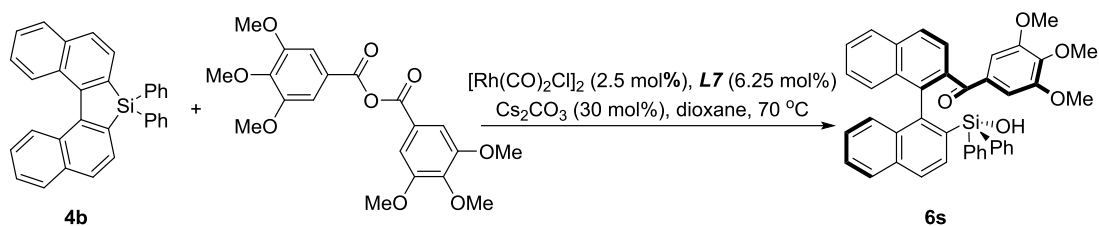

Compound **6s** was prepared following the **Typical Procedure F**

The reaction of **4b** (87 mg, 0.20 mmol) and 3,4,5-trimethoxybenzoic anhydride (122 mg, 0.30 mmol) with  $[\text{Rh}(\text{CO})_2\text{Cl}]_2$  (2.0 mg, 0.005 mmol, 2.5 mol%), **L7** (14.6 mg, 0.013 mmol, 6.25 mol%) afforded **6s** (69 mg, 53%, 87% ee).  $[\alpha]_D^{20} - 114.06$  (c 1.10,  $\text{CH}_2\text{Cl}_2$ ). HPLC conditions: Chiralcel AD-H, isopropanol/hexane = 20:80, flow: 1.0 mL/min,  $\lambda = 230$  nm.  $^1\text{H NMR}$  (400 MHz,  $\text{CDCl}_3$ )  $\delta$  7.90 (d,  $J = 8.0$  Hz, 1H), 7.81 – 7.77 (m, 2H), 7.77 – 7.75 (m, 2H), 7.75 – 7.73 (m, 1H), 7.64 (d,  $J = 8.4$  Hz, 1H), 7.54 (d,  $J = 8.4$  Hz, 1H), 7.45 – 7.39 (m, 2H), 7.49 – 7.35 (m, 1H), 7.39 – 7.29 (m, 2H), 7.12 – 7.07 (m, 2H), 7.07 – 7.02 (m, 2H), 7.02 – 6.97 (m, 1H), 6.93 – 6.88 (m, 2H), 6.88 – 6.85 (m, 2H), 6.85 – 6.80 (m, 2H), 5.30 (s, 1H), 3.82 (s, 3H), 3.72 (s, 6H).  $^{13}\text{C NMR}$  (100 MHz,  $\text{CDCl}_3$ )  $\delta$  199.7, 152.3, 142.7, 142.0, 137.4, 136.7, 136.6, 135.9, 135.1, 134.5, 133.8, 133.6, 133.4, 132.8, 132.6, 132.0, 131.6, 129.5, 128.6, 128.0, 127.8, 127.73, 127.67, 127.6, 127.0, 126.9, 126.8, 126.5, 126.4, 125.7, 123.9, 108.1, 60.8, 56.0. **HRMS (ESI)** calcd for  $\text{C}_{42}\text{H}_{35}\text{O}_5\text{Si}$   $[\text{M}+\text{H}]^+$  647.2254, found 647.2249.

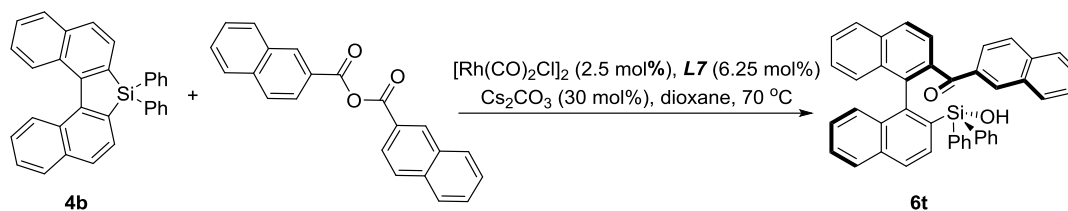

Compound **6t** was prepared following the **Typical Procedure F**

The reaction of **4b** (87 mg, 0.20 mmol) and 2-naphthoic anhydride (98 mg, 0.30 mmol) with  $[\text{Rh}(\text{CO})_2\text{Cl}]_2$  (2.0 mg, 0.005 mmol, 2.5 mol%), **L7** (14.6 mg, 0.013 mmol, 6.25 mol%) afforded **6t** (108 mg, 89%, 90% ee).  $[\alpha]_D^{20} - 260.01$  (c 1.10,  $\text{CH}_2\text{Cl}_2$ ). HPLC conditions: Chiralcel AD-H, isopropanol/hexane = 20:80, flow: 1.0 mL/min,  $\lambda = 254$  nm.  $^1\text{H NMR}$  (400 MHz,  $\text{CDCl}_3$ )  $\delta$  8.11 (s, 1H), 7.93 (d,  $J = 8.4$  Hz, 1H), 7.86 – 7.80 (m, 2H), 7.80 – 7.76 (m, 2H), 7.76 – 7.72 (m, 2H), 7.72 – 7.70 (m, 1H), 7.70 – 7.64 (m, 2H), 7.64 – 7.58 (m, 2H), 7.54 (t,  $J = 7.6$  Hz, 1H), 7.49 – 7.44 (m, 1H), 7.44 – 7.41 (m, 2H), 7.41 – 7.37 (m, 1H), 7.35 (t,  $J = 7.6$  Hz, 1H), 7.21 (d,  $J = 8.8$  Hz, 1H), 7.16 (t,  $J = 7.6$  Hz, 1H), 7.09 (d,  $J = 7.6$  Hz, 2H), 7.01 (t,  $J = 8.2$  Hz, 2H), 6.92 (t,  $J = 7.6$  Hz, 1H), 6.89 – 6.87 (m, 1H), 6.87 – 6.80 (m, 2H), 5.47 (s, 1H).  $^{13}\text{C NMR}$  (100 MHz,  $\text{CDCl}_3$ )  $\delta$  200.7, 142.0, 137.5, 136.9, 136.7, 136.0, 135.6, 135.1, 134.5, 133.8, 133.7, 133.62, 133.60, 133.5, 132.9, 132.5, 132.0, 131.7, 129.6, 129.5, 128.8, 128.6, 128.0, 127.9, 127.83, 127.78, 127.7, 127.61, 127.56, 127.0, 126.9, 126.8, 126.6, 126.53, 126.50, 126.3, 125.7, 124.9, 124.1. **HRMS (ESI)** calcd for  $\text{C}_{43}\text{H}_{30}\text{O}_2\text{SiNa}$   $[\text{M}+\text{Na}]^+$  629.1913, found 629.1911.



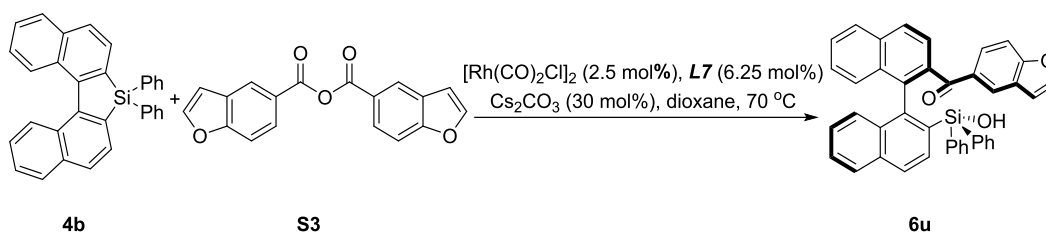

Compound **6u** was prepared following the **Typical Procedure F**

The reaction of **4b** (87 mg, 0.20 mmol) and **S3** (92 mg, 0.30 mmol) with  $[\text{Rh}(\text{CO})_2\text{Cl}]_2$  (2.0 mg, 0.005 mmol, 2.5 mol%), **L7** (14.6 mg, 0.013 mmol, 6.25 mol%) afforded **6u** (75 mg, 63%, 90% ee).  $[\alpha]_D^{20} - 156.59$  (c 0.98,  $\text{CH}_2\text{Cl}_2$ ). HPLC conditions: Chiralcel AD-H, isopropanol/hexane = 20:80, flow: 1.0 mL/min,  $\lambda = 254$  nm.  $^1\text{H NMR}$  (500 MHz,  $\text{CDCl}_3$ )  $\delta$  7.91 (d,  $J = 10.5$  Hz, 2H), 7.82 (d,  $J = 4.5$  Hz, 2H), 7.75 (d,  $J = 9.0$  Hz, 1H), 7.74 – 7.70 (m, 1H), 7.70 – 7.65 (m, 2H), 7.65 – 7.61 (m, 1H), 7.57 (d,  $J = 9.0$  Hz, 2H), 7.47 – 7.37 (m, 3H), 7.32 (t,  $J = 9.0$  Hz, 2H), 7.22 (t,  $J = 7.0$  Hz, 1H), 7.15 (d,  $J = 8.5$  Hz, 1H), 7.10 – 7.06 (m, 2H), 7.03 (d,  $J = 8.0$  Hz, 1H), 6.99 (t,  $J = 7.0$  Hz, 1H), 6.90 (t,  $J = 7.5$  Hz, 1H), 6.88 – 6.85 (m, 1H), 6.85 – 6.80 (m, 2H), 6.66 (s, 1H), 5.64 (s, 1H).  $^{13}\text{C NMR}$  (126 MHz,  $\text{CDCl}_3$ )  $\delta$  200.4, 157.6, 146.3, 142.0, 137.2, 137.1, 136.8, 136.0, 135.2, 134.5, 133.7, 133.6, 133.4, 132.9, 132.4, 132.0, 131.7, 129.5, 128.5, 127.83, 127.79, 127.77, 127.7, 127.5, 127.04, 126.95, 126.9, 126.8, 126.6, 126.5, 126.3, 125.6, 125.5, 124.0, 111.0, 107.1. **HRMS (ESI)** calcd for  $\text{C}_{41}\text{H}_{28}\text{O}_3\text{SiNa}$   $[\text{M}+\text{Na}]^+$  619.1705, found 619.1706.

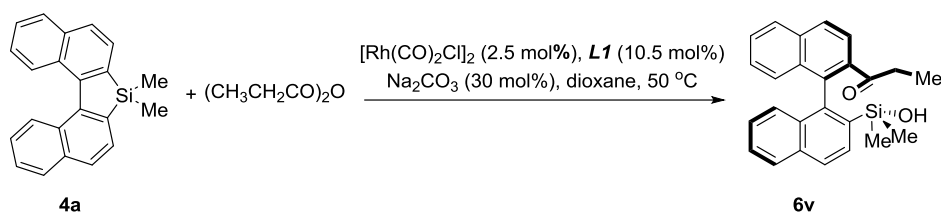

Compound **6v** was prepared following the **Typical Procedure F**

The reaction of **4a** (62 mg, 0.20 mmol) and propionic anhydride (38  $\mu\text{L}$ , 0.30 mmol) with  $[\text{Rh}(\text{CO})_2\text{Cl}]_2$  (2.0 mg, 0.005 mmol, 2.5 mol%), **L1** (18.9 mg, 0.021 mmol, 10.5 mol%) afforded **6v** (71 mg, 92%, 85% ee).  $[\alpha]_D^{20} + 4.20$  (c 0.98,  $\text{CH}_2\text{Cl}_2$ ). HPLC conditions: Chiralcel AD-H, isopropanol/hexane = 8:92, flow: 1.0 mL/min,  $\lambda = 230$  nm.  $^1\text{H NMR}$  (500 MHz,  $\text{CDCl}_3$ )  $\delta$  8.04 (d,  $J = 8.5$  Hz, 1H), 7.97 (d,  $J = 8.0$  Hz, 1H), 7.94 (d,  $J = 8.0$  Hz, 1H), 7.91 (d,  $J = 8.0$  Hz, 1H), 7.85 (d,  $J = 8.5$  Hz, 1H), 7.69 (d,  $J = 8.5$  Hz, 1H), 7.54 – 7.49 (m, 1H), 7.49 – 7.43 (m, 1H), 7.30 – 7.26 (m, 1H), 7.26 – 7.21 (m, 1H), 7.17 – 7.10 (m, 2H), 3.22 (s, 1H), 2.48 (dq,  $J = 18.5, 7.0$  Hz, 1H), 2.55 – 2.40 (dq,  $J = 18.5, 7.0$  Hz, 1H), 0.74 (t,  $J = 7.0$  Hz, 3H), 0.22 (s, 3H), -0.53 (s, 3H).  $^{13}\text{C NMR}$  (126 MHz,  $\text{CDCl}_3$ )  $\delta$  209.3, 141.3, 138.7, 138.1, 136.5, 133.9, 133.7, 133.5, 132.6, 130.4, 128.6, 128.1, 128.0, 127.9, 127.4, 127.3, 127.0, 126.5, 126.4, 126.2, 123.4, 36.0, 7.9, 0.7, 0.6. **HRMS (ESI)** calcd for  $\text{C}_{25}\text{H}_{24}\text{O}_2\text{SiNa}$   $[\text{M}+\text{Na}]^+$  407.1443, found 407.1455.

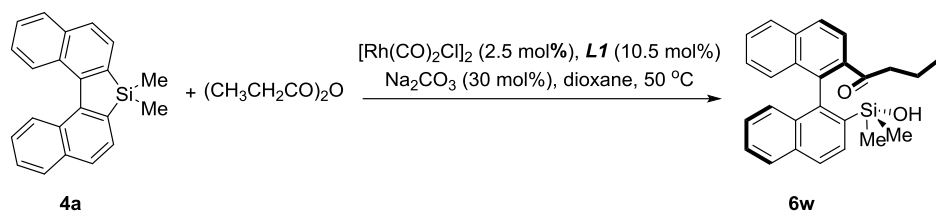

Compound **6w** was prepared following the **Typical Procedure F**

The reaction of **4a** (62 mg, 0.20 mmol) and butyric anhydride (38  $\mu\text{L}$ , 0.30 mmol) with  $[\text{Rh}(\text{CO})_2\text{Cl}]_2$  (2.0 mg, 0.005 mmol, 2.5 mol%), **L1** (18.9 mg, 0.021 mmol, 10.5 mol%) afforded **6w** (43 mg, 53%, 90% ee).  $[\alpha]_D^{20} + 0.29$  (c 1.13,  $\text{CH}_2\text{Cl}_2$ ). HPLC conditions: Chiralcel AD-H, isopropanol/hexane = 4:96, flow: 1.0 mL/min,  $\lambda = 254 \text{ nm}$ .  $^1\text{H NMR}$  (400 MHz,  $\text{CDCl}_3$ )  $\delta$  8.03 (d,  $J = 8.4 \text{ Hz}$ , 1H), 7.95 (t,  $J = 7.4 \text{ Hz}$ , 2H), 7.90 (d,  $J = 8.0 \text{ Hz}$ , 1H), 7.83 (d,  $J = 8.4 \text{ Hz}$ , 1H), 7.63 (d,  $J = 8.4 \text{ Hz}$ , 1H), 7.55 – 7.49 (m, 1H), 7.49 – 7.42 (m, 1H), 7.32 – 7.27 (m, 1H), 7.25 – 7.21 (m, 1H), 7.17 (d,  $J = 8.0 \text{ Hz}$ , 1H), 7.12 (d,  $J = 8.4 \text{ Hz}$ , 1H), 3.29 (s, 1H), 2.48 – 2.32 (m, 1H), 2.28 – 2.09 (m, 1H), 1.30 – 1.20 (m, 2H), 0.41 (t,  $J = 7.4 \text{ Hz}$ , 3H), 0.24 (s, 3H), -0.56 (s, 3H).  $^{13}\text{C NMR}$  (100 MHz,  $\text{CDCl}_3$ )  $\delta$  209.3, 141.1, 139.2, 138.3, 136.2, 133.80, 133.76, 133.5, 132.6, 130.4, 128.6, 128.1, 128.0, 127.8, 127.4, 127.3, 127.0, 126.5, 126.34, 126.30, 123.2, 44.7, 16.9, 13.1, 0.68, 0.65. **HRMS (ESI)** calcd for  $\text{C}_{26}\text{H}_{26}\text{O}_2\text{SiNa}$   $[\text{M}+\text{Na}]^+$  421.1600, found 407.1606.

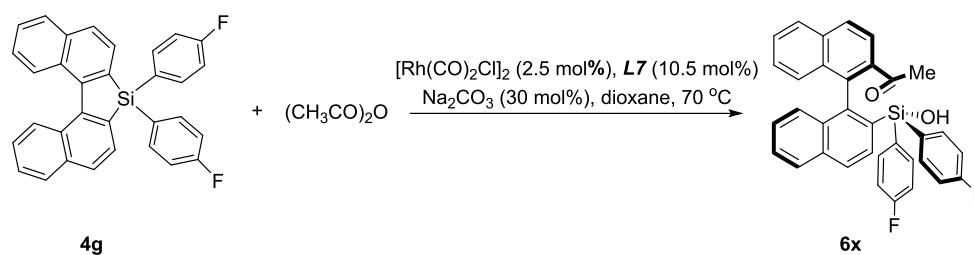

Compound **6x** was prepared following the **Typical Procedure F**

The reaction of **4g** (94 mg, 0.20 mmol) and acetic anhydride (28  $\mu\text{L}$ , 0.30 mmol) with  $[\text{Rh}(\text{CO})_2\text{Cl}]_2$  (2.0 mg, 0.005 mmol, 2.5 mol%), **L7** (24.5 mg, 0.021 mmol, 10.5 mol%) afforded **6x** (99 mg, 96%, 91% ee).  $[\alpha]_D^{20} + 24.07$  (c 0.97,  $\text{CH}_2\text{Cl}_2$ ). HPLC conditions: Chiralcel AD-H, isopropanol/hexane = 20:80, flow: 1.0 mL/min,  $\lambda = 254 \text{ nm}$ .  $^1\text{H NMR}$  (400 MHz,  $\text{CDCl}_3$ )  $\delta$  7.90 (d,  $J = 8.0$ , 1H), 7.89 (d,  $J = 8.4$ , 1H), 7.86 (d,  $J = 8.8 \text{ Hz}$ , 1H), 7.72 (d,  $J = 8.0 \text{ Hz}$ , 1H), 7.66 – 7.61 (m, 2H), 7.61 – 7.56 (m, 2H), 7.50 – 7.44 (m, 1H), 7.40 – 7.32 (m, 1H), 7.25 – 7.19 (m, 1H), 7.09 – 7.05 (m, 2H), 7.04 – 7.02 (m, 1H), 7.02 – 6.96 (m, 2H), 6.96 – 6.93 (m, 1H), 6.83 (d,  $J = 8.4 \text{ Hz}$ , 1H), 6.56 – 6.47 (m, 2H), 4.12 (s, 1H), 2.06 (s, 3H).  $^{13}\text{C NMR}$  (100 MHz,  $\text{CDCl}_3$ )  $\delta$  207.0, 164.1 (d,  $^1J_{\text{C-F}} = 247.6 \text{ Hz}$ ), 163.4 (d,  $^1J_{\text{C-F}} = 247.6 \text{ Hz}$ ), 143.0, 138.3, 136.9 (d,  $^3J_{\text{C-F}} = 7.6 \text{ Hz}$ ), 135.9, 135.4 (d,  $^3J_{\text{C-F}} = 7.6 \text{ Hz}$ ), 134.6, 134.0, 133.7, 132.7, 131.9, 131.4 (d,  $^4J_{\text{C-F}} = 3.8 \text{ Hz}$ ), 129.8 (d,  $^4J_{\text{C-F}} = 3.6 \text{ Hz}$ ), 128.9, 128.2, 127.8, 127.6, 127.3, 127.1, 127.0, 126.7, 126.6, 126.1, 122.7, 115.0 (d,  $^2J_{\text{C-F}} = 19.6 \text{ Hz}$ ), 114.1 (d,  $^2J_{\text{C-F}} = 19.8 \text{ Hz}$ ), 30.6.  $^{19}\text{F NMR}$  (376 MHz,  $\text{CDCl}_3$ )  $\delta$  - 110.7, - 111.8. **HRMS (ESI)** calcd for  $\text{C}_{34}\text{H}_{24}\text{F}_2\text{O}_2\text{SiNa}$   $[\text{M}+\text{Na}]^+$  553.1411, found 553.1414.

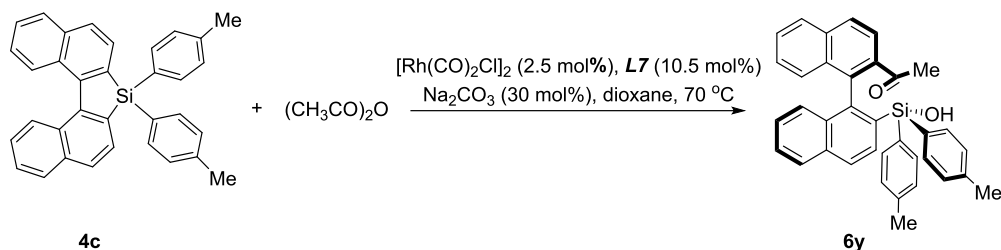

Compound **6y** was prepared following the **Typical Procedure F**

The reaction of **4c** (93 mg, 0.20 mmol) and acetic anhydride (28  $\mu\text{L}$ , 0.30 mmol) with  $[\text{Rh}(\text{CO})_2\text{Cl}]_2$  (2.0 mg, 0.005 mmol, 2.5 mol%), **L7** (24.5 mg, 0.021 mmol, 10.5 mol%) afforded **6y** (81 mg, 78%, 92% ee).  $[\alpha]_D^{20} + 4.23$  (c 1.07,  $\text{CH}_2\text{Cl}_2$ ). HPLC conditions: Chiralcel 0AD-H, isopropanol/hexane = 20:80, flow: 1.0 mL/min,  $\lambda = 254$  nm.  $^1\text{H NMR}$  (400 MHz,  $\text{CDCl}_3$ )  $\delta$  7.92 – 7.88 (m, 2H), 7.88 – 7.83 (m, 1H), 7.72 (d,  $J = 8.4$  Hz, 2H), 7.67 (dd,  $J = 8.4$  Hz, 1.4 Hz, 1H), 7.51 (d,  $J = 6.8$  Hz, 2H), 7.49 – 7.43 (m, 1H), 7.38 – 7.32 (m, 1H), 7.25 – 7.19 (m, 1H), 7.16 (d,  $J = 7.6$  Hz, 2H), 7.07 (d,  $J = 8.8$  Hz, 1H), 7.00 – 6.95 (m, 1H), 6.95 – 6.92 (m, 2H), 6.92 – 6.87 (m, 1H), 6.69 (d,  $J = 7.2$  Hz, 2H), 3.33 (s, 1H), 2.36 (s, 3H), 2.17 (s, 3H), 1.98 (s, 3H).  $^{13}\text{C NMR}$  (100 MHz,  $\text{CDCl}_3$ )  $\delta$  205.6, 143.1, 139.5, 138.5, 138.0, 136.7, 135.3, 134.9, 133.8, 133.7, 132.93, 132.87, 132.29, 132.26, 131.0, 128.6, 128.5, 128.14, 128.10, 127.8, 127.5, 127.0, 126.9, 126.7, 126.5, 126.4, 126.2, 123.3, 30.4, 21.6, 21.4. **HRMS (ESI)** calcd for  $\text{C}_{36}\text{H}_{30}\text{O}_2\text{SiNa}$   $[\text{M}+\text{Na}]^+$  545.1913, found 545.1921.

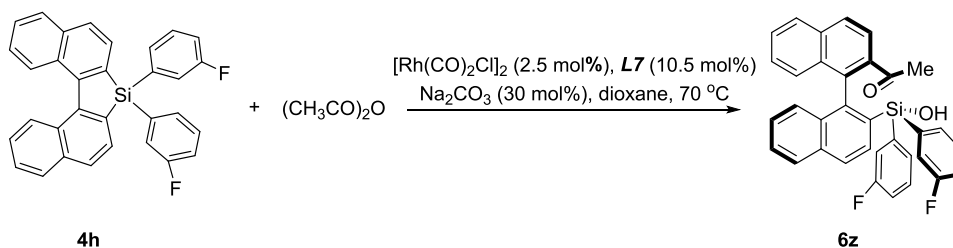

Compound **6z** was prepared following the **Typical Procedure F**

The reaction of **4h** (94 mg, 0.20 mmol) and acetic anhydride (28  $\mu\text{L}$ , 0.30 mmol) with  $[\text{Rh}(\text{CO})_2\text{Cl}]_2$  (2.0 mg, 0.005 mmol, 2.5 mol%), **L7** (24.5 mg, 0.021 mmol, 10.5 mol%) afforded **6z** (100 mg, 94%, 94% ee).  $[\alpha]_D^{20} + 20.87$  (c 0.99,  $\text{CH}_2\text{Cl}_2$ ). HPLC conditions: Chiralcel AD-H, isopropanol/hexane = 20:80, flow: 1.0 mL/min,  $\lambda = 254$  nm.  $^1\text{H NMR}$  (400 MHz,  $\text{CDCl}_3$ )  $\delta$  7.90 (dd,  $J = 8.6, 2.4$  Hz, 2H), 7.86 (d,  $J = 8.8$  Hz, 1H), 7.69 (d,  $J = 8.2$  Hz, 1H), 7.62 (d,  $J = 5.6$  Hz, 1H), 7.60 (d,  $J = 5.6$  Hz, 1H), 7.51 – 7.46 (m, 1H), 7.46 – 7.41 (m, 1H), 7.39 – 7.35 (m, 1H), 7.35 – 7.30 (m, 2H), 7.25 – 7.20 (m, 1H), 7.13 – 7.08 (m, 1H), 7.08 – 7.04 (m, 1H), 7.04 – 6.98 (m, 1H), 6.84 (d,  $J = 8.4$  Hz, 1H), 6.81 – 6.74 (m, 2H), 6.65 – 6.57 (m, 2H), 4.42 (s, 1H), 2.08 (s, 3H).  $^{13}\text{C NMR}$  (100 MHz,  $\text{CDCl}_3$ )  $\delta$  207.4, 162.5 (d,  $^1J_{\text{C-F}} = 246.9$  Hz), 161.6 (d,  $^1J_{\text{C-F}} = 246.1$  Hz), 138.5 (d,  $^3J_{\text{C-F}} = 4.3$  Hz), 138.4, 136.8 (d,  $^3J_{\text{C-F}} = 4.3$  Hz), 135.7, 134.1, 133.6, 132.7, 132.7, 131.9, 130.4 (d,  $^4J_{\text{C-F}} = 2.9$  Hz), 129.74, 129.68, 129.02, 128.97 (d,  $^4J_{\text{C-F}} = 2.9$  Hz), 128.8, 128.7, 128.3, 127.7, 127.6, 127.5, 127.2, 127.0, 126.72, 126.68, 126.1, 122.6, 121.2 (d,  $^2J_{\text{C-F}} = 19$  Hz), 119.6 (d,  $^2J_{\text{C-F}} = 19.2$  Hz), 116.8 (d,  $^2J_{\text{C-F}} = 20.8$  Hz), 115.9 (d,  $^2J_{\text{C-F}} = 21$  Hz), 30.7.  $^{19}\text{F NMR}$  (376 MHz,  $\text{CDCl}_3$ )  $\delta$  - 113.2, - 113.8. **HRMS (ESI)** calcd for  $\text{C}_{34}\text{H}_{24}\text{F}_2\text{O}_2\text{SiNa}$   $[\text{M}+\text{Na}]^+$  553.1411, found 553.1411.

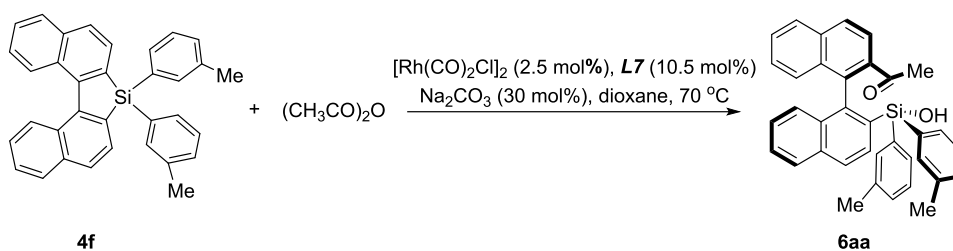

Compound **6aa** was prepared following the **Typical Procedure F**

The reaction of **4f** (92 mg, 0.20 mmol) and acetic anhydride (28  $\mu\text{L}$ , 0.30 mmol) with  $[\text{Rh}(\text{CO})_2\text{Cl}]_2$  (2.0 mg, 0.005 mmol, 2.5 mol%), **L7** (24.5 mg, 0.021 mmol, 10.5 mol%) afforded **6aa** (101 mg, 96%, 92% ee).  $[\alpha]_D^{20} + 20.99$  (c 1.05,  $\text{CH}_2\text{Cl}_2$ ). HPLC conditions: Chiralcel AD-H, isopropanol/hexane = 20:80, flow: 1.0 mL/min,  $\lambda = 254 \text{ nm}$ .  $^1\text{H NMR}$  (400 MHz,  $\text{CDCl}_3$ )  $\delta$  7.92 – 7.87 (m, 2H), 7.85 (d,  $J = 8.4 \text{ Hz}$ , 1H), 7.70 (d,  $J = 8.4 \text{ Hz}$ , 2H), 7.65 (d,  $J = 8.4 \text{ Hz}$ , 1H), 7.49 – 7.44 (m, 1H), 7.44 – 7.39 (m, 2H), 7.34 – 7.29 (m, 1H), 7.24 – 7.20 (m, 2H), 7.20 – 7.15 (m, 1H), 7.05 (d,  $J = 8.4 \text{ Hz}$ , 1H), 7.00 – 6.94 (m, 1H), 6.92 – 6.86 (m, 2H), 6.83 – 6.78 (m, 2H), 6.78 – 6.75 (m, 1H), 3.53 (s, 1H), 2.32 (s, 3H), 2.03 (s, 3H), 1.99 (s, 3H).  $^{13}\text{C NMR}$  (100 MHz,  $\text{CDCl}_3$ )  $\delta$  205.8, 143.2, 138.0, 137.0, 136.6, 136.1, 135.6, 135.4, 135.2, 134.2, 134.1, 133.9, 133.8, 132.9, 132.8, 132.3, 132.0, 130.9, 130.4, 129.7, 128.7, 128.2, 127.9, 127.6, 127.4, 127.10, 127.08, 126.9, 126.7, 126.43, 126.39, 126.2, 123.1, 30.5, 21.6, 21.4. **HRMS (ESI)** calcd for  $\text{C}_{36}\text{H}_{30}\text{O}_2\text{SiNa}$   $[\text{M}+\text{Na}]^+$  545.1913, found 545.1913.

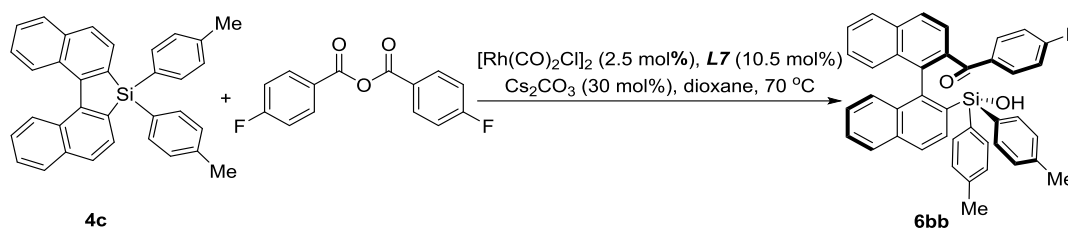

Compound **6bb** was prepared following the **Typical Procedure F**

The reaction of **4c** (92 mg, 0.20 mmol) and 4-fluorobenzoic anhydride (79 mg, 0.30 mmol) with  $[\text{Rh}(\text{CO})_2\text{Cl}]_2$  (2.0 mg, 0.005 mmol, 2.5 mol%), **L7** (24.5 mg, 0.021 mmol, 10.5 mol%) afforded **6bb** (78 mg, 65%, 91% ee).  $[\alpha]_D^{20} - 65.65$  (c 1.10,  $\text{CH}_2\text{Cl}_2$ ). HPLC conditions: Chiralcel AD-H, isopropanol/hexane = 20:80, flow: 1.0 mL/min,  $\lambda = 254 \text{ nm}$ .  $^1\text{H NMR}$  (500 MHz,  $\text{CDCl}_3$ )  $\delta$  7.89 (d,  $J = 8.5 \text{ Hz}$ , 1H), 7.76 – 7.74 (m, 1H), 7.74 – 7.71 (m, 2H), 7.67 – 7.64 (m, 2H), 7.64 – 7.63 (m, 1H), 7.63 – 7.62 (m, 1H), 7.62 – 7.59 (m, 1H), 7.50 (d,  $J = 8.5 \text{ Hz}$ , 1H), 7.37 – 7.33 (m, 1H), 7.33 – 7.29 (m, 1H), 7.19 (d,  $J = 7.5 \text{ Hz}$ , 2H), 7.11 – 7.02 (m, 2H), 6.96 – 6.92 (m, 1H), 6.92 – 6.90 (m, 2H), 6.88 – 6.85 (m, 1H), 6.85 – 6.80 (m, 2H), 6.62 (d,  $J = 7.5 \text{ Hz}$ , 2H), 4.99 (s, 1H), 2.37 (s, 3H), 2.15 (s, 3H).  $^{13}\text{C NMR}$  (126 MHz,  $\text{CDCl}_3$ )  $\delta$  199.0, 165.7 (d,  $^1J_{\text{C-F}} = 254.6 \text{ Hz}$ ), 141.8, 139.4, 138.1, 137.7, 136.4 (d,  $^3J_{\text{C-F}} = 10.8 \text{ Hz}$ ), 135.2, 133.7, 133.6, 133.5, 133.1, 133.01, 133.00, 132.97, 132.80, 132.77, 132.5, 132.1, 131.2, 128.5, 127.9 (d,  $^4J_{\text{C-F}} = 3.5 \text{ Hz}$ ), 127.8, 127.7, 127.5, 127.0, 126.7, 126.6, 126.5, 126.3, 125.7, 123.9, 115.0 (d,  $^2J_{\text{C-F}} = 22.1 \text{ Hz}$ ), 21.5, 21.3.  $^{19}\text{F NMR}$  (471 MHz,  $\text{CDCl}_3$ )  $\delta$  -104.2. **HRMS (ESI)** calcd for  $\text{C}_{41}\text{H}_{31}\text{FO}_2\text{SiNa}$   $[\text{M}+\text{Na}]^+$  625.1975, found 625.1960.

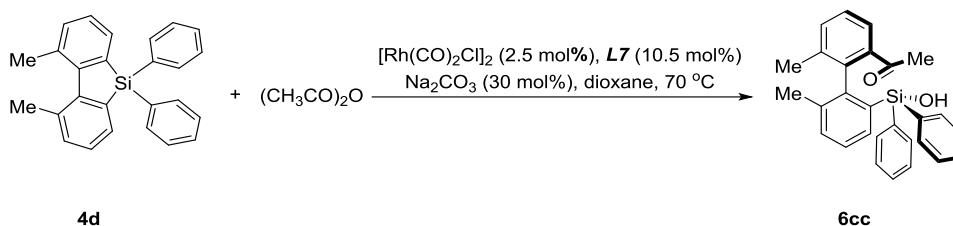

Compound **6cc** was prepared following the **Typical Procedure F**

The reaction of **4d** (73 mg, 0.20 mmol) and acetic anhydride (28  $\mu\text{L}$ , 0.30 mmol) with  $[\text{Rh}(\text{CO})_2\text{Cl}]_2$  (2.0 mg, 0.005 mmol, 2.5 mol%), **L7** (24.5 mg, 0.021 mmol, 10.5 mol%) afforded **6cc** (70 mg, 83%, 88% ee).  $[\alpha]_D^{20} + 14.03$  (c 1.00,  $\text{CH}_2\text{Cl}_2$ ). HPLC conditions: Chiralcel AD-H, isopropanol/hexane = 20:80, flow: 1.0 mL/min,  $\lambda = 254$  nm.  $^1\text{H NMR}$  (400 MHz,  $\text{CDCl}_3$ )  $\delta$  7.61 – 7.57 (m, 2H), 7.45 – 7.41 (m, 1H), 7.40 – 7.37 (m, 1H), 7.37 – 7.34 (m, 2H), 7.34 – 7.33 (m, 2H), 7.33 – 7.31 (m, 2H), 7.31 – 7.30 (m, 1H), 7.30 – 7.27 (m, 1H), 7.25 – 7.22 (m, 2H), 7.22 – 7.19 (m, 1H), 7.10 (d,  $J = 8.4$  Hz, 1H), 3.21 (s, 1H), 2.09 (s, 3H), 1.92 (s, 3H), 1.51 (s, 3H).  $^{13}\text{C NMR}$  (100 MHz,  $\text{CDCl}_3$ )  $\delta$  205.0, 145.0, 139.6, 138.8, 138.1, 136.2, 135.7, 135.4, 135.0, 134.7, 134.54, 134.49, 132.8, 131.7, 129.6, 129.3, 127.7, 127.6, 127.4, 126.7, 124.9, 29.7, 19.9, 19.6. **HRMS (ESI)** calcd for  $\text{C}_{28}\text{H}_{26}\text{FO}_2\text{SiNa}$   $[\text{M}+\text{Na}]^+$  445.1600, found 445.1602.

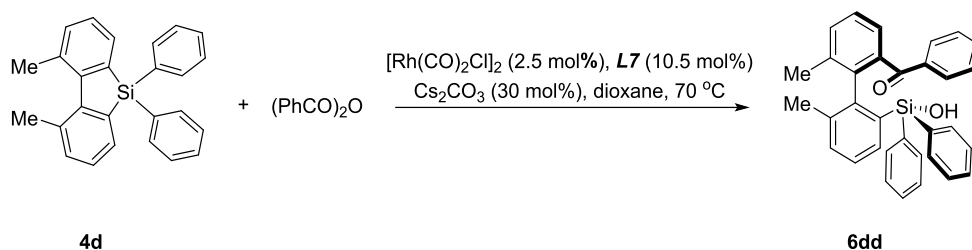

Compound **6dd** was prepared following the **Typical Procedure F**

The reaction of **4d** (73 mg, 0.20 mmol) and benzoic anhydride (68 mg, 0.30 mmol) with  $[\text{Rh}(\text{CO})_2\text{Cl}]_2$  (2.0 mg, 0.005 mmol, 2.5 mol%), **L7** (24.5 mg, 0.021 mmol, 10.5 mol%) afforded **6dd** (68 mg, 70%, 85% ee).  $[\alpha]_D^{20} - 72.17$  (c 1.00,  $\text{CH}_2\text{Cl}_2$ ). HPLC conditions: Chiralcel AD-H, isopropanol/hexane = 20:80, flow: 1.0 mL/min,  $\lambda = 254$  nm.  $^1\text{H NMR}$  (500 MHz,  $\text{CDCl}_3$ )  $\delta$  7.81 – 7.77 (m, 2H), 7.75 (d,  $J = 7.5$  Hz, 2H), 7.55 (t,  $J = 7.5$  Hz, 1H), 7.42 – 7.39 (m, 2H), 7.39 – 7.38 (m, 2H), 7.38 – 7.37 (m, 2H), 7.37 – 7.35 (m, 1H), 7.35 – 7.33 (m, 1H), 7.32 – 7.28 (m, 1H), 7.28 – 7.24 (m, 2H), 7.21 (t,  $J = 7.5$  Hz, 2H), 7.10 (t,  $J = 7.5$  Hz, 1H), 7.09 – 7.05 (m, 1H), 7.04 – 6.99 (m, 1H), 5.41 (s, 1H), 1.75 (s, 3H), 1.34 (s, 3H).  $^{13}\text{C NMR}$  (126 MHz,  $\text{CDCl}_3$ )  $\delta$  200.5, 143.7, 139.6, 138.4, 137.8, 137.1, 136.5, 136.4, 135.6, 135.24, 135.17, 134.5, 133.6, 132.2, 131.6, 130.8, 129.4, 129.1, 128.2, 127.6, 127.2, 126.7, 126.5, 125.7, 20.1, 19.5. **HRMS (ESI)** calcd for  $\text{C}_{33}\text{H}_{28}\text{O}_2\text{SiNa}$   $[\text{M}+\text{Na}]^+$  507.1756, found 507.1763.

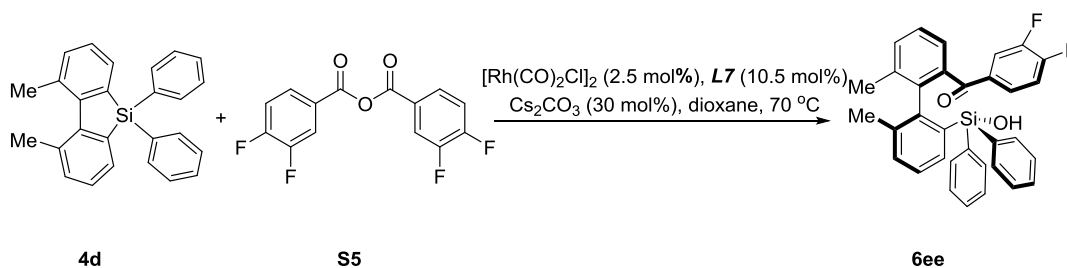

Compound **6ee** was prepared following the **Typical Procedure F**

The reaction of **4d** (73 mg, 0.20 mmol) and **S5** (89 mg, 0.30 mmol) with  $[\text{Rh}(\text{CO})_2\text{Cl}]_2$  (2.0 mg, 0.005 mmol, 2.5 mol%), **L7** (24.5 mg, 0.021 mmol, 10.5 mol%) afforded **6ee** (69 mg, 66%, 88% ee).  $[\alpha]_D^{20} - 50.35$  (c 0.90,  $\text{CH}_2\text{Cl}_2$ ). HPLC conditions: Chiralcel AD-H, isopropanol/hexane = 20:80, flow: 1.0 mL/min,  $\lambda = 254$  nm.  **$^1\text{H}$  NMR** (400 MHz,  $\text{CDCl}_3$ )  $\delta$  7.62 (d,  $J = 6.4$  Hz, 2H), 7.53 – 7.45 (m, 1H), 7.43 – 7.37 (m, 1H), 7.33 – 7.28 (m, 2H), 7.28 – 7.26 (m, 2H), 7.26 – 7.24 (m, 2H), 7.24 – 7.19 (m, 2H), 7.18 – 7.16 (m, 1H), 7.16 – 7.10 (m, 2H), 7.10 – 7.05 (m, 2H), 7.05 – 7.02 (m, 1H), 7.01 (d,  $J = 7.6$  Hz, 1H), 4.60 (s, 1H), 1.70 (s, 3H), 1.34 (s, 3H).  **$^{13}\text{C}$  NMR** (100 MHz,  $\text{CDCl}_3$ )  $\delta$  197.4, 153.9 (dd,  $J_{\text{C-F}} = 256.9$ , 12.8 Hz), 150.0 (dd,  $J_{\text{C-F}} = 249.7$ , 12.9 Hz), 143.5, 139.9, 138.7, 136.9, 136.7, 135.9, 135.4, 135.3, 135.1, 134.6, 134.5, 133.69, 133.65, 133.6, 132.7, 131.6, 129.5, 129.2, 128.0 (d,  $J_{\text{C-F}} = 3.6$  Hz), 127.9 (d,  $J_{\text{C-F}} = 3.1$  Hz), 127.6, 127.3, 126.8, 126.7, 125.6, 119.5 (d,  $J_{\text{C-F}} = 18.0$  Hz), 117.1 (d,  $J_{\text{C-F}} = 17.6$  Hz), 20.1, 19.5.  **$^{19}\text{F}$  NMR** (376 MHz,  $\text{CDCl}_3$ )  $\delta$  - 128.5, - 135.8. **HRMS (ESI)** calcd for  $\text{C}_{33}\text{H}_{26}\text{F}_2\text{O}_2\text{SiNa}$   $[\text{M}+\text{Na}]^+$  543.1568, found 543.1579.

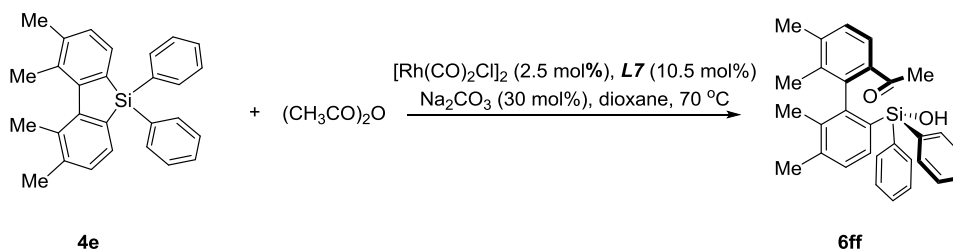

Compound **6E** was prepared following the **Typical Procedure F**

The reaction of **4e** (78 mg, 0.20 mmol) and acetic anhydride (28  $\mu\text{L}$ , 0.30 mmol) with  $[\text{Rh}(\text{CO})_2\text{Cl}]_2$  (2.0 mg, 0.005 mmol, 2.5 mol%), **L7** (24.5 mg, 0.021 mmol, 10.5 mol%) afforded **6ff** (40 mg, 45%, 87% ee).  $[\alpha]_D^{20} + 35.74$  (c 0.77,  $\text{CH}_2\text{Cl}_2$ ). HPLC conditions: Chiralcel AD-H, isopropanol/hexane = 20:80, flow: 1.0 mL/min,  $\lambda = 230$  nm.  **$^1\text{H}$  NMR** (400 MHz,  $\text{CDCl}_3$ )  $\delta$  7.61 (d,  $J = 7.2$  Hz, 2H), 7.42 – 7.37 (m 1H), 7.36 – 7.34 (m, 1H), 7.34 – 7.31 (m, 2H), 7.31 – 7.27 (m, 2H), 7.27 – 7.26 (m, 1H), 7.22 (d,  $J = 8.0$  Hz, 2H), 7.18 (d,  $J = 7.2$  Hz, 1H), 7.14 (d,  $J = 7.6$  Hz, 1H), 7.09 (d,  $J = 7.6$  Hz, 1H), 3.42 (s, 1H), 2.30 (s, 3H), 2.06 (s, 3H), 2.04 (s, 3H), 1.82 (s, 3H), 1.27 (s, 3H).  **$^{13}\text{C}$  NMR** (100 MHz,  $\text{CDCl}_3$ )  $\delta$  205.7, 145.5, 140.6, 139.0, 138.8, 138.1, 136.7, 136.4, 135.8, 135.0, 134.6, 134.4, 134.3, 132.4, 129.4, 129.1, 128.9, 128.3, 127.6, 127.2, 124.5, 29.9, 20.8, 20.7, 16.1, 16.0. **HRMS (ESI)** calcd for  $\text{C}_{30}\text{H}_{30}\text{O}_2\text{SiNa}$   $[\text{M}+\text{Na}]^+$  473.1913, found 473.1918.

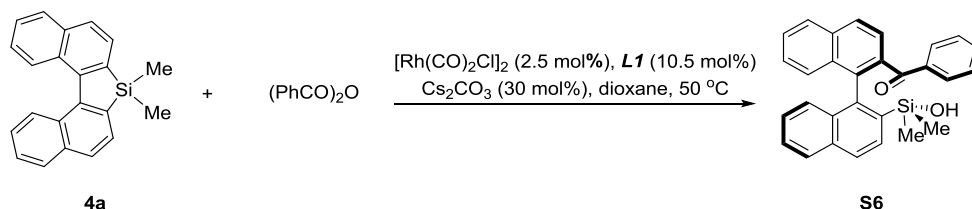

Compound **S6** was prepared following the **Typical Procedure F**

The reaction of **4a** (62 mg, 0.20 mmol) and benzoic anhydride (68 mg, 0.30 mmol) with  $[\text{Rh}(\text{CO})_2\text{Cl}]_2$  (2.0 mg, 0.005 mmol, 2.5 mol%), **L1** (18.9 mg, 0.021 mmol, 10.5 mol%) afforded **S6** (43 mg, 54%, 75% ee).  $[\alpha]_D^{20} + 64.22$  (c 1.07,  $\text{CH}_2\text{Cl}_2$ ). HPLC conditions: Chiralcel AD-H,

isopropanol/hexane = 20:80, flow: 1.0 mL/min,  $\lambda = 254$  nm.  $^1\text{H NMR}$  (400 MHz,  $\text{CDCl}_3$ )  $\delta$  8.05 (d,  $J = 8.4$  Hz, 1H), 7.99 (d,  $J = 8.0$  Hz, 1H), 7.83 (d,  $J = 8.0$  Hz, 1H), 7.79 (d,  $J = 8.0$  Hz, 1H), 7.72 (d,  $J = 8.4$  Hz, 1H), 7.61 – 7.60 (m, 1H), 7.60 – 7.59 (m, 1H), 7.58 – 7.57 (m, 1H), 7.56 – 7.52 (m, 1H), 7.38 – 7.34 (m, 1H), 7.34 – 7.31 (m, 1H), 7.31 – 7.28 (m, 1H), 7.23 – 7.20 (m, 1H), 7.20 – 7.16 (m, 2H), 7.16 – 7.12 (m, 1H), 7.11 – 7.05 (m, 1H), 4.24 (s, 1H), 0.40 (s, 3H), -0.59 (s, 3H).  $^{13}\text{C NMR}$  (100 MHz,  $\text{CDCl}_3$ )  $\delta$  200.1, 140.3, 138.7, 138.2, 136.9, 136.4, 133.8, 133.6, 133.2, 132.2, 130.3, 130.1, 128.1, 127.9, 127.8, 127.7, 127.4, 127.3, 127.0, 126.6, 126.1, 125.7, 124.7, 0.83, 0.75. **HRMS (ESI)** calcd for  $\text{C}_{29}\text{H}_{24}\text{O}_2\text{SiNa}$   $[\text{M}+\text{Na}]^+$  455.1443, found 455.1440.

## Control Experiments

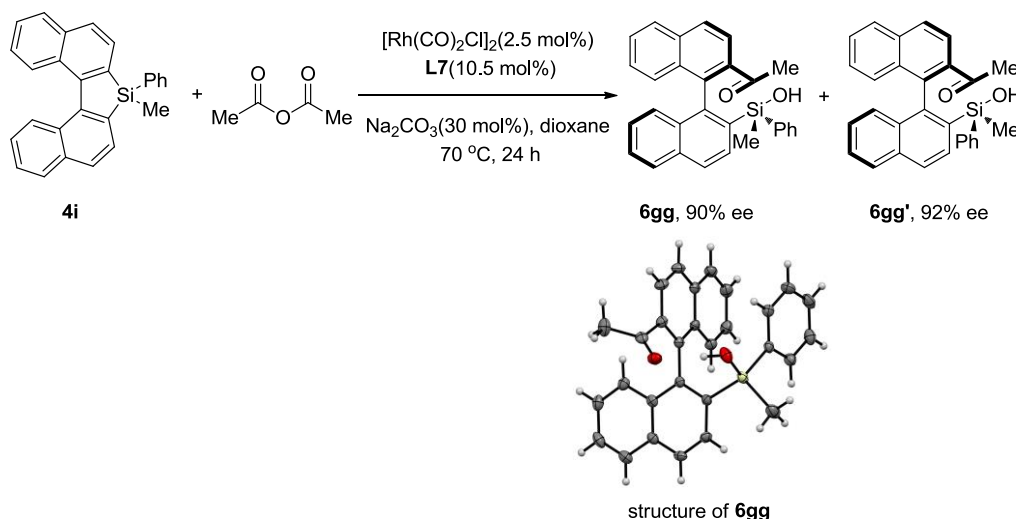

Under nitrogen atmosphere, to a Schleck tube was added  $[\text{Rh}(\text{CO})_2\text{Cl}]_2$  (2.0 mg, 0.005 mmol, 2.5 mol%), **L7** (24.5 mg, 0.021 mmol, 10.5 mol%) and dioxane (2 mL) at room temperature and was stirred for 30 minutes. The solution was transfer via cannula carefully to another Schlenk tube charged with **4i** (75 mg, 0.200 mmol, 1.0 equiv), acetic anhydride (28  $\mu\text{L}$ , 0.300 mmol, 1.5 equiv),  $\text{Na}_2\text{CO}_3$  (6.4 mg, 0.060 mmol, 30 mol%) and dioxane (2 mL). The tube was capped with a screw cap and stirred at 70  $^\circ\text{C}$  for 24 h. After being cooled to room temperature, the mixture was filtered through Celite and the filtrate was concentrated in vacuum and purified by flash column chromatography (PE/EtOAc = 90:10) on silica gel to afford a mixture of **6gg** and **6gg'** (85 mg, 99%). A small amount of **6gg** and **6gg'** could be separated by preparative TLC, and the related configuration was determined by single crystal X-ray diffraction analysis. The ee value was determined by the mixture of **6gg** and **6gg'**.

**6gg**:  $[\alpha]_D^{20} + 7.17$  (c 1.06,  $\text{CH}_2\text{Cl}_2$ ). HPLC conditions: Chiralcel AD-H, isopropanol/hexane = 10:90, flow: 1.0 mL/min,  $\lambda = 254$  nm.  $^1\text{H NMR}$  (500 MHz,  $\text{CDCl}_3$ )  $\delta$  8.00 (d,  $J = 8.0$  Hz, 1H), 7.95 (d,  $J = 8.5$  Hz, 1H), 7.93 – 7.87 (m, 2H), 7.74 (d,  $J = 8.0$  Hz, 1H), 7.69 (d,  $J = 9.0$  Hz, 1H), 7.48 – 7.43 (m, 1H), 7.36 – 7.30 (m, 1H), 7.23 – 7.18 (m, 1H), 7.04 – 7.00 (m, 1H), 7.00 – 6.97 (m, 1H), 6.97 – 6.94 (m, 1H), 6.92 – 6.88 (m, 2H), 6.88 – 6.86 (m, 1H), 6.86 – 6.84 (m, 1H), 6.84 – 6.80 (m, 1H), 3.33 (s, 1H), 1.92 (s, 3H), 0.40 (s, 3H).  $^{13}\text{C NMR}$  (126 MHz,  $\text{CDCl}_3$ )  $\delta$  205.6, 142.4, 138.0, 136.74, 136.69, 136.2, 133.93, 133.89, 133.1, 132.82, 132.79, 130.9, 128.70, 128.69, 128.1, 127.9, 127.6, 127.5, 127.2,

127.0, 126.7, 126.6, 126.5, 126.1, 123.4, 30.4, 0.5. **HRMS (ESI)** calcd for C<sub>29</sub>H<sub>24</sub>O<sub>2</sub>SiNa [M+Na]<sup>+</sup> 455.1443, found 455.1440.

**6gg**<sup>2</sup>: [α]<sub>D</sub><sup>20</sup> + 55.71 (c 0.42, CH<sub>2</sub>Cl<sub>2</sub>). HPLC conditions: Chiralcel AD-H, isopropanol/hexane = 10:90, flow: 1.0 mL/min, λ = 254 nm. **<sup>1</sup>H NMR** (500 MHz, CDCl<sub>3</sub>) δ 8.03 (d, *J* = 8.5 Hz, 1H), 7.93 (d, *J* = 8.0 Hz, 1H), 7.88 (d, *J* = 8.5 Hz, 1H), 7.85 (d, *J* = 8.5 Hz, 1H), 7.77 (d, *J* = 8.5 Hz, 1H), 7.58 (d, *J* = 8.0 Hz, 1H), 7.54 – 7.49 (m, 1H), 7.48 – 7.45 (m, 1H), 7.45 – 7.41 (m, 2H), 7.37 – 7.32 (m, 1H), 7.32 – 7.27 (m, 2H), 7.27 – 7.26 (m, 1H), 7.25 – 7.20 (m, 1H), 7.16 (d, *J* = 8.5 Hz, 1H), 7.11 (d, *J* = 8.5 Hz, 1H), 3.28 (s, 1H), 1.98 (s, 3H), -0.27 (s, 3H). **<sup>13</sup>C NMR** (126 MHz, CDCl<sub>3</sub>) δ 205.4, 142.3, 138.3, 137.7, 137.0, 136.5, 134.1, 133.8, 133.5, 132.7, 131.6, 129.4, 128.7, 128.2, 128.00, 127.98, 127.7, 127.6, 127.3, 127.0, 126.7, 126.5, 126.1, 123.7, 30.4, 0.7. **HRMS (ESI)** calcd for C<sub>29</sub>H<sub>24</sub>O<sub>2</sub>SiNa [M+Na]<sup>+</sup> 455.1443, found 455.1440.

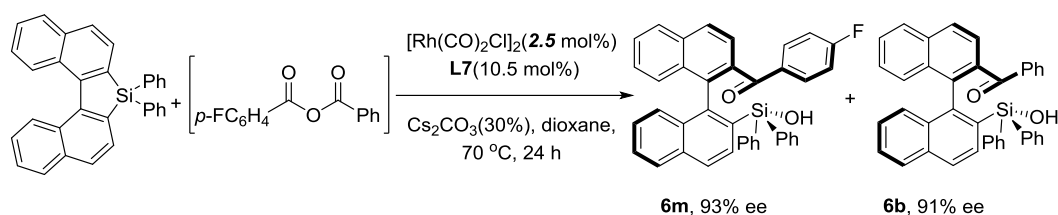

Under nitrogen atmosphere, a Schlenk tube was sequentially charged with Cs<sub>2</sub>CO<sub>3</sub> (3.0 equiv), benzoic acid (18.0 mg, 0.150 mmol, 1.5 equiv), 4-fluorobenzoyl chloride (18 μL, 0.150 mmol, 1.5 equiv) and 1,4-dioxane (2.0 mL). After stirred at room temperature for 2 h, the mixture was filtered by syringe and transferred to a Schlenk tube charged with [Rh(CO)<sub>2</sub>Cl]<sub>2</sub> (1.0 mg, 0.0025 mmol, 2.5 mol%), **L7** (7.3 mg, 0.0625 mmol, 6.25 mol%) and Cs<sub>2</sub>CO<sub>3</sub> (10 mg, 0.030 mmol, 30 mol%). The mixture was stirred at 70 °C for 24 hour. After being cooled to room temperature, the mixture was filtered through Celite and the filtrate was concentrated in vacuum and purified by flash column chromatography (PE/EtOAc = 90:10) on silica gel to afford a mixture of **6m** and **6b** (46.6 mg, 83%). The ee value was determined by the mixture of **6m** and **6b**. HPLC conditions: Chiralcel AD-H, isopropanol/hexane = 20:80, flow: 1.0 mL/min, λ = 254 nm. The spectra data was listed as followed.

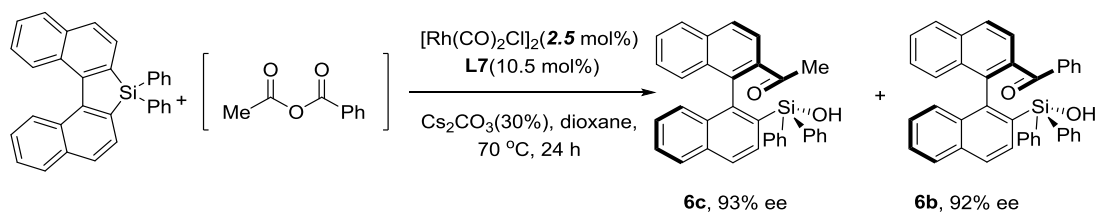

Under nitrogen atmosphere, a Schlenk tube was sequentially charged with Cs<sub>2</sub>CO<sub>3</sub> (3.0 equiv), benzoic acid (18.0 mg, 0.150 mmol, 1.5 equiv), Acetyl chloride (11 μL, 0.150 mmol, 1.5 equiv) and 1,4-dioxane (2.0 mL). After stirred at room temperature for 2 h, the mixture was filtered by syringe and transferred to a Schlenk tube charged with [Rh(CO)<sub>2</sub>Cl]<sub>2</sub> (1.0 mg, 0.0025 mmol, 2.5 mol%), **L7** (7.3 mg, 0.0625 mmol, 6.25 mol%) and Cs<sub>2</sub>CO<sub>3</sub> (10 mg, 0.030 mmol, 30 mol%). The mixture was stirred at 70 °C for 24 hour. After being cooled to room temperature, the mixture was filtered through Celite and the filtrate was concentrated in vacuum and purified by flash column



chromatography (PE/EtOAc = 90:10) on silica gel to afford **6c** (6.0 mg, 11%, 92% ee) and **6b** (36.4 mg, 74%, 93% ee). **6c** HPLC conditions: Chiralcel AD-H, isopropanol/hexane = 20:80, flow: 1.0 mL/min,  $\lambda = 254$  nm. **6b** HPLC conditions: Chiralcel AD-H, isopropanol/hexane = 15:85, flow: 1.0 mL/min,  $\lambda = 254$  nm.

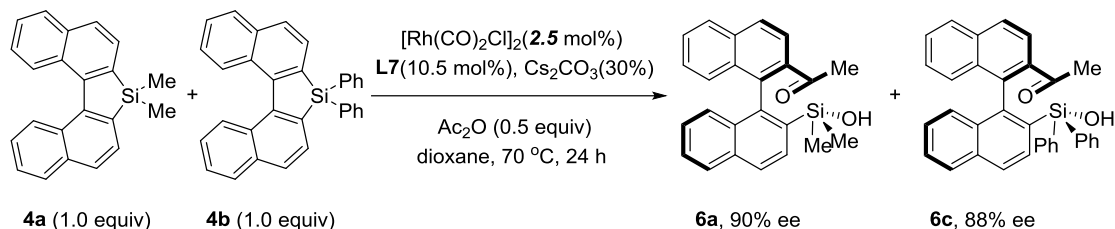

Under nitrogen atmosphere, to a Schleck tube was added  $[\text{Rh}(\text{CO})_2\text{Cl}]_2$  (1.0 mg, 0.0025 mmol, 2.5 mol%), **L7** (12.2 mg, 0.0105 mmol, 10.5 mol%) and dioxane (2 mL) at room temperature and was stirred for 30 minutes. The solution was transfer via cannula carefully to another Schlenk tube charged with **4a** (31 mg, 0.100 mmol, 1.0 equiv), **4b** (44 mg, 0.100 mmol, 1.0 equiv), acetic anhydride (5  $\mu\text{L}$ , 0.050 mmol, 0.5 equiv),  $\text{Na}_2\text{CO}_3$  (3.2 mg, 0.030 mmol, 30 mol%). The tube was capped with a screw cap and stirred at 70 °C for 24 h. After being cooled to room temperature, the mixture was filtered through Celite and the filtrate was concentrated in vacuum and purified by flash column chromatography (PE/EtOAc = 90:10) on silica gel to afford **6a** (9.4 mg, 51%, 90% ee) and **6c** (8.4 mg, 34%, 88% ee). **6a** HPLC conditions: Chiralcel AD-H, isopropanol/hexane = 10:90, flow: 1.0 mL/min,  $\lambda = 254$  nm. **6c** HPLC conditions: Chiralcel AD-H, isopropanol/hexane = 20:80, flow: 1.0 mL/min,  $\lambda = 254$  nm.

### Procedure for the synthesis of Hydroxysilanol **7**

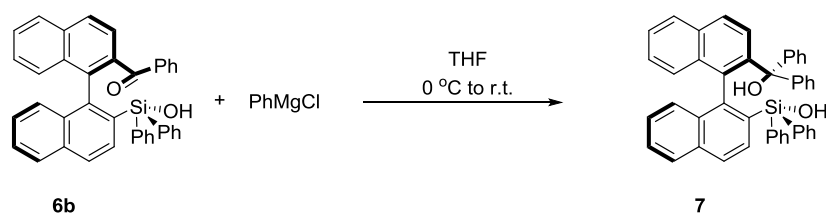

To the mixture of **6b** (28 mg, 0.05 mmol) in THF (2.0 mL) was added  $\text{PhMgCl}$  (75  $\mu\text{L}$ , 0.15 mmol, 2.0 M in THF) at room temperature. Then the mixture was stirred over night before being quenched with saturated  $\text{NH}_4\text{Cl}$  (aq.). The mixture was extracted with ethyl acetate (5 mL\*3), and the combined organic layer was washed with brine, dried over  $\text{Na}_2\text{SO}_4$ , filtered, concentrated and purified by flash column chromatography (PE/EtOAc/DCM = 80:10:10) on silica gel to afford **7** (30 mg, 94%, 91% ee).  $[\alpha]_D^{20} + 110.45$  (c 0.92,  $\text{CH}_2\text{Cl}_2$ ). HPLC conditions: Chiralcel AD-H, isopropanol/hexane = 10:90, flow: 1.0 mL/min,  $\lambda = 254$  nm.  $^1\text{H NMR}$  (500 MHz,  $\text{CDCl}_3$ )  $\delta$  7.85 (d,  $J = 8.5$  Hz, 1H), 7.76 – 7.73 (m, 2H), 7.73 – 7.70 (m, 2H), 7.70 – 7.68 (m, 1H), 7.66 (d,  $J = 8.0$  Hz, 1H), 7.42 (d,  $J = 7.0$  Hz, 1H), 7.38 (t,  $J = 7.3$  Hz, 2H), 7.34 – 7.31 (m, 2H), 7.31 – 7.30 (m, 2H), 7.30 – 7.28 (m, 1H), 7.24 – 7.19 (m, 2H), 7.19 – 7.16 (m, 1H), 7.12 – 7.09 (m, 2H), 7.09 –

7.07 (m, 1H), 7.00 – 6.96 (m, 1H), 6.96 – 6.93 (m, 2H), 6.93 – 6.90 (m, 2H), 6.85 (d,  $J = 7.5$  Hz, 2H), 6.69 (t,  $J = 7.8$  Hz, 1H), 6.58 (d,  $J = 8.5$  Hz, 1H), 6.52 (t,  $J = 7.5$  Hz, 1H), 6.25 (d,  $J = 8.5$  Hz, 1H), 3.24 (s, 1H), 3.21 (s, 1H).  $^{13}\text{C}$  NMR (125 MHz,  $\text{CDCl}_3$ )  $\delta$  147.2, 144.1, 143.9, 142.0, 136.1, 136.0, 135.3, 134.8, 134.2, 133.8, 133.73, 133.65, 132.0, 131.9, 131.6, 129.9, 129.0, 128.7, 128.3, 128.2, 128.1, 127.9, 127.6, 127.4, 127.30, 127.25, 127.2, 127.1, 126.99, 126.95, 126.9, 126.6, 126.4, 126.1, 125.9, 125.4, 84.7. **HRMS (ESI)** calcd for  $\text{C}_{45}\text{H}_{35}\text{O}_2\text{Si}$   $[\text{M}+\text{H}]^+$  635.2406, found 635.2407.

## Procedure for the synthesis of Bromides **9**

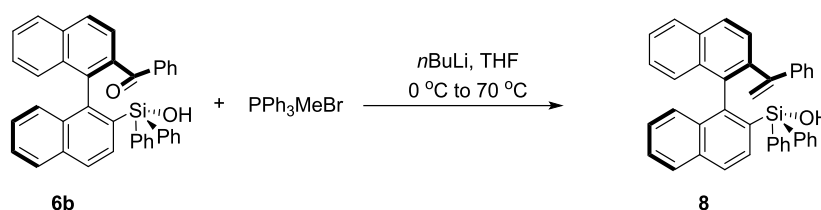

To the Flask tube charged with methyltriphenylphosphonium bromide (1.79 g, 5.00 mmol) in THF (8 mL) was added *n*BuLi (2.10 mL, 5.00 mmol, 2.4 M in hexanes) dropwise at 0 °C. Then the mixture was allowed to warm to room temperature and stirred for 1 hour. A mixture of **6b** (0.278 g, 0.50 mmol) in THF (2 mL) was added slowly at room temperature and the mixture was stirred at 70 °C for 12 hours. After being cooled to room temperature, the reaction was quenched with water (5 mL) and extracted with ethyl acetate (5 mL\*3), and the combined organic layer was washed with brine, dried over  $\text{Na}_2\text{SO}_4$ , filtered, concentrated and purified by flash column chromatography (PE/EtOAc = 90:10) on silica gel to afford **8** (0.259 g, 93%, 91% ee).  $[\alpha]_D^{20} + 9.89$  (c 0.93,  $\text{CH}_2\text{Cl}_2$ ). HPLC conditions: Chiralcel AD-H, isopropanol/hexane = 10:90, flow: 1.0 mL/min,  $\lambda = 254$  nm.  $^1\text{H}$  NMR (500 MHz,  $\text{CDCl}_3$ )  $\delta$  7.96 (d,  $J = 8.5$  Hz, 1H), 7.86 (d,  $J = 8.0$  Hz, 1H), 7.70 (d,  $J = 8.5$  Hz, 1H), 7.65 (d,  $J = 8.5$  Hz, 1H), 7.62 (d,  $J = 8.5$  Hz, 1H), 7.58 – 7.56 (m, 1H), 7.56 – 7.52 (m, 2H), 7.40 (t,  $J = 7.3$  Hz, 1H), 7.37 – 7.33 (m, 2H), 7.33 – 7.31 (m, 1H), 7.30 – 7.26 (m, 1H), 7.20 (t,  $J = 7.5$  Hz, 1H), 7.11 – 7.08 (m, 2H), 7.08 – 7.04 (m, 2H), 7.02 – 6.99 (m, 2H), 6.99 – 6.96 (m, 1H), 6.92 (t,  $J = 7.5$  Hz, 1H), 6.83 – 6.77 (m, 2H), 6.77 – 6.76 (m, 2H), 6.76 – 6.73 (m, 1H), 5.19 (d,  $J = 9.0$  Hz, 2H).  $^{13}\text{C}$  NMR (125 MHz,  $\text{CDCl}_3$ )  $\delta$  149.8, 144.1, 140.9, 139.3, 136.4, 135.9, 135.5, 135.1, 134.2, 133.4, 133.3, 132.8, 132.59, 132.57, 131.4, 129.8, 129.2, 128.4, 128.2, 127.6, 127.38, 127.35, 127.24, 127.23, 126.8, 126.5, 126.4, 126.3, 126.2, 126.1, 125.4, 118.5. **HRMS (ESI)** calcd for  $\text{C}_{40}\text{H}_{30}\text{OSiNa}$   $[\text{M}+\text{Na}]^+$  577.1964, found 577.1969.

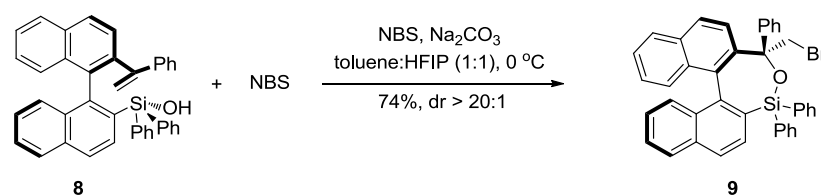

To the mixture of **8** (54 mg, 0.10 mmol) and Na<sub>2</sub>CO<sub>3</sub> (42 mg, 0.40 mmol) in toluene (5.0 mL) and hexafluoroisopropanol (5.0 mL) was added NBS (19 mg, 0.105 mmol) in one portion at 0 °C. Then the mixture was stirred at the same temperature until the complete consumption of **8**. Then mixture was allowed to warm to room temperature and filter through Celite, concentrated and purified by flash column chromatography (PE/DCM = 90:10) on silica gel to afford **9** (47 mg, 74%, 90% ee). [ $\alpha$ ]<sub>D</sub><sup>20</sup> + 86.77 (c 1.13, CH<sub>2</sub>Cl<sub>2</sub>). HPLC conditions: Chiralcel AD-H, isopropanol/hexane = 6:94, flow: 1.0 mL/min,  $\lambda$  = 273 nm. <sup>1</sup>H NMR (500 MHz, CDCl<sub>3</sub>)  $\delta$  7.98 (d, *J* = 9.0 Hz, 1H), 7.82 (d, *J* = 7.0 Hz, 2H), 7.65 (d, *J* = 9.0 Hz, 1H), 7.58 (d, *J* = 8.0 Hz, 2H), 7.57 – 7.53 (m, 1H), 7.53 – 7.49 (m, 2H), 7.49 – 7.45 (m, 1H), 7.33 (d, *J* = 8.0 Hz, 1H), 7.30 – 7.28 (m, 1H), 7.28 – 7.24 (m, 2H), 7.08 – 7.05 (m, 2H), 7.05 – 6.99 (m, 2H), 6.99 – 6.95 (m, 1H), 6.89 – 6.85 (m, 1H), 6.85 – 6.81 (m, 1H), 6.81 – 6.76 (m, 2H), 6.62 (t, *J* = 7.5 Hz, 2H), 6.58 – 6.43 (m, 1H), 6.39 (t, *J* = 7.0 Hz, 1H), 4.27 (d, *J* = 10.5 Hz, 1H), 4.19 (d, *J* = 10.5 Hz, 1H). <sup>13</sup>C NMR (125 MHz, CDCl<sub>3</sub>)  $\delta$  144.6, 143.3, 140.2, 137.6, 135.5, 134.0, 133.9, 133.7, 133.54, 133.46, 132.8, 132.6, 131.4, 130.2, 129.6, 128.2, 128.1, 127.8, 127.6, 127.5, 127.3, 127.1, 126.2, 126.1, 126.0, 125.8, 125.7, 125.0, 124.9, 123.9, 80.5, 44.4. HRMS (ESI) calcd for C<sub>40</sub>H<sub>29</sub>OSiBrNa [M+Na]<sup>+</sup> 655.1069, found 655.1058.

### Procedure for the application of silanol on cross-coupling reaction

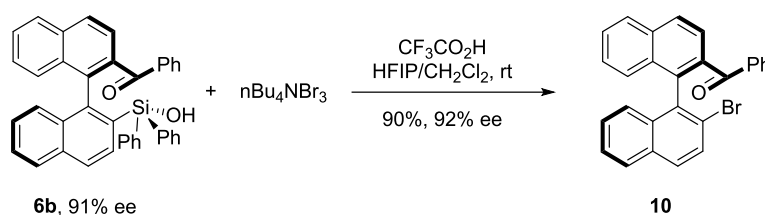

To the solution of **6b** (56 mg, 0.10 mmol, 91% ee) in CF<sub>3</sub>COOH (0.2 mL), hexafluoroisopropanol (4 mL) and DCM (2.0 mL) was added nBu<sub>4</sub>NBr<sub>3</sub> (72 mg, 0.15 mmol, 1.50 equiv) at room temperature. Then the mixture was stirred at the same temperature until the complete consumption of **6b**. Then mixture was diluted with ethyl acetate (5.0 mL), extracted with ethyl acetate (5.0 mL\*3), the combined organic layer was washed with brine, dried over Na<sub>2</sub>SO<sub>4</sub>, concentrated and purified by flash column chromatography (PE/EA = 95:5) on silica gel to afford **10** (39 mg, 90%, 92% ee). [ $\alpha$ ]<sub>D</sub><sup>20</sup> + 28.2 (c 0.98, CH<sub>2</sub>Cl<sub>2</sub>). HPLC conditions: Chiralcel OD-H, isopropanol/hexane = 5:95, flow: 1.0 mL/min,  $\lambda$  = 254 nm. <sup>1</sup>H NMR (400 MHz, CDCl<sub>3</sub>)  $\delta$  8.19 (d, *J* = 8.4 Hz, 1H), 8.06 (d, *J* = 8.4 Hz, 1H), 8.00 (d, *J* = 8.4 Hz, 1H), 7.70 – 7.64 (m, 2H), 7.60 – 7.53 (m, 1H), 7.53 – 7.50 (m, 1H), 7.50 – 7.46 (m, 2H), 7.38 – 7.34 (m, 1H), 7.34 – 7.32 (m, 2H), 7.32 – 7.28 (m, 2H), 7.18 – 7.15 (m, 1H), 7.15 – 7.08 (m, 2H). <sup>13</sup>C NMR (100 MHz, CDCl<sub>3</sub>)  $\delta$  198.4, 137.8, 137.5, 136.2, 135.4, 134.1, 133.9, 132.6, 132.5, 131.5, 129.3, 129.1, 129.0, 128.2, 128.1, 127.8, 127.4, 127.28, 127.26, 127.21, 127.16, 127.1, 126.8, 124.9, 123.2. HRMS (ESI) calcd for C<sub>27</sub>H<sub>18</sub>OBr [M+H]<sup>+</sup> 437.0541, found 437.0543.

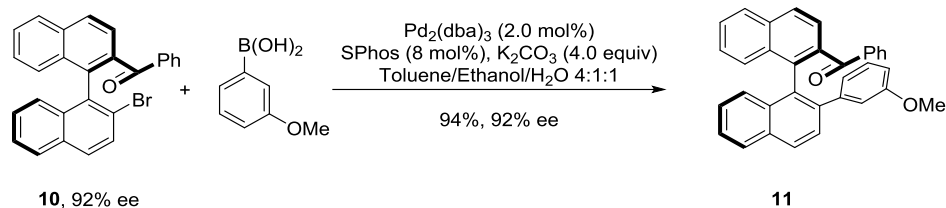

The mixture of **10** (22 mg, 0.050 mmol, 1.0 equiv, 92% ee), 3-methoxyphenylboronic acid (12 mg, 0.075 mmol, 1.5 equiv),  $\text{Pd}_2(\text{dba})_3$  (0.9 mg, 0.001 mmol, 2.0 mol%), SPhos (1.6 mg, 0.004 mmol, 8.0 mol%) and  $\text{K}_2\text{CO}_3$  (28 mg, 0.200 mmol, 4.0 equiv) in toluene (0.8 mL), ethanol (0.2 mL) and  $\text{H}_2\text{O}$  (0.2 mL) was stirred at 90 °C for 3 hours. After being cooled to room temperature, the reaction was diluted with ethyl acetate (5 mL) and extracted with ethyl acetate (5 mL\*3), and the combined organic layer was washed with brine, dried over  $\text{Na}_2\text{SO}_4$ , filtered, concentrated and purified by flash column chromatography (PE/EtOAc = 90:10) on silica gel to afford **11** (22 mg, 94%, 92% ee).  $[\alpha]_D^{20} + 50.0$  (c 0.87,  $\text{CH}_2\text{Cl}_2$ ). HPLC conditions: Chiralcel OD-H, isopropanol/hexane = 5:95, flow: 1.0 mL/min,  $\lambda = 254$  nm.  $^1\text{H NMR}$  (400 MHz,  $\text{CDCl}_3$ )  $\delta$  8.07 (d,  $J = 8.4$  Hz, 1H), 8.02 (d,  $J = 8.0$  Hz, 1H), 7.82 (d,  $J = 8.4$  Hz, 1H), 7.73 (d,  $J = 8.4$  Hz, 1H), 7.61 – 7.54 (m, 1H), 7.50 (d,  $J = 8.4$  Hz, 1H), 7.45 – 7.42 (m, 2H), 7.42 – 7.40 (m, 2H), 7.40 – 7.35 (m, 2H), 7.35 – 7.30 (m, 2H), 7.29 – 7.27 (m, 1H), 7.25 – 7.20 (m, 1H), 7.13 – 7.05 (m, 2H), 7.04 – 7.00 (m, 1H), 7.00 – 6.94 (m, 2H), 3.87 (s, 3H).  $^{13}\text{C NMR}$  (100 MHz,  $\text{CDCl}_3$ )  $\delta$  199.2, 159.4, 143.3, 142.0, 140.2, 138.0, 137.8, 137.4, 134.78, 134.75, 134.1, 133.1, 132.7, 132.0, 131.2, 130.5, 129.1, 129.03, 128.96, 128.5, 128.4, 128.1, 127.6, 127.5, 127.2, 126.9, 126.2, 125.8, 125.7, 125.4, 125.2, 122.5, 115.6, 112.9, 55.3. **HRMS (ESI)** calcd for  $\text{C}_{34}\text{H}_{25}\text{O}$   $[\text{M}+\text{H}]^+$  465.1855, found 465.1847.

### Procedure for the synthesis of Rhodium-Ligand Complex

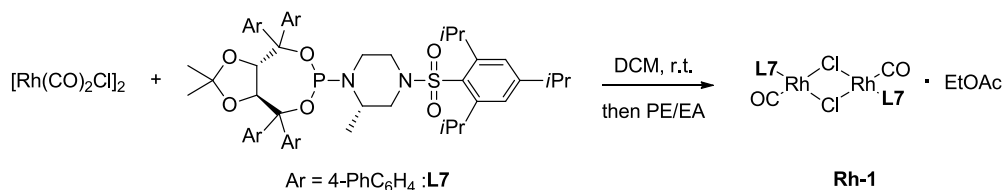

A mixture of  $[\text{Rh}(\text{CO})_2\text{Cl}]_2$  (5.8 mg, 0.015 mmol, 1.0 equiv) and **L7** (35.0 mg, 0.03 mmol, 2.0 equiv) in DCM (2 mL) was stirred at room temperature for 30 mins. Then the solvent was removed under vacuum and crystallized in mixture solvent (PE:EtOAc = 10:1) under an atmosphere of nitrogen at – 20 °C to afford orange crystal **Rh-1** (30 mg, 80%).  $^1\text{H NMR}$  (400 MHz,  $\text{CDCl}_3$ )  $\delta$  7.72 – 7.67 (m, 4H), 7.67 – 7.63 (m, 4H), 7.63 – 7.60 (m, 2H), 7.58 – 7.55 (m, 2H), 7.55 – 7.52 (m, 2H), 7.52 – 7.50 (m, 2H), 7.50 – 7.47 (m, 4H), 7.47 – 7.44 (m, 2H), 7.43 – 7.38 (m, 4H), 7.38 – 7.34 (m, 4H), 7.34 – 7.32 (m, 4H), 7.32 – 7.29 (m, 2H), 7.05 (s, 2H), 5.76 (d,  $J = 8.0$  Hz, 1H), 5.66 – 5.51 (m, 1H), 5.36 (d,  $J = 8.0$  Hz, 1H), 4.08 – 3.94 (m, 2H), 3.65 – 3.50 (m, 1H), 3.35 – 3.26 (m, 1H), 3.13 – 3.02 (m, 1H), 2.92 – 2.78 (m, 3H), 1.99 – 1.83 (m, 1H), 1.21 (d,  $J = 6.8$  Hz, 6H), 1.16 (d,  $J = 6.8$  Hz, 3H), 1.12 (d,  $J = 6.4$  Hz, 6H), 1.00 (d,  $J = 6.8$  Hz, 6H), 0.59 (s, 3H), 0.52 (s, 3H).  $^{13}\text{C NMR}$  (126 MHz,  $\text{CDCl}_3$ )  $\delta$  153.2, 152.0, 142.3, 142.2, 141.21, 141.17, 140.5, 140.4, 140.2, 139.9, 129.7, 129.1, 128.9, 128.83, 128.78, 128.72, 128.68, 128.4, 127.9,

127.8, 127.7, 127.4, 127.3, 127.2, 127.1, 127.01, 126.96, 125.6, 123.8, 115.1, 90.7 (d,  $J = 18.9$  Hz), 86.8, 78.6, 78.3, 50.8, 50.6, 48.4, 45.3, 40.4, 34.1, 29.3, 26.7, 26.5, 25.0, 24.6, 23.5, 17.2.  $^{31}\text{P}$  NMR (162 MHz,  $\text{CDCl}_3$ )  $\delta$  115.9, 114.2.

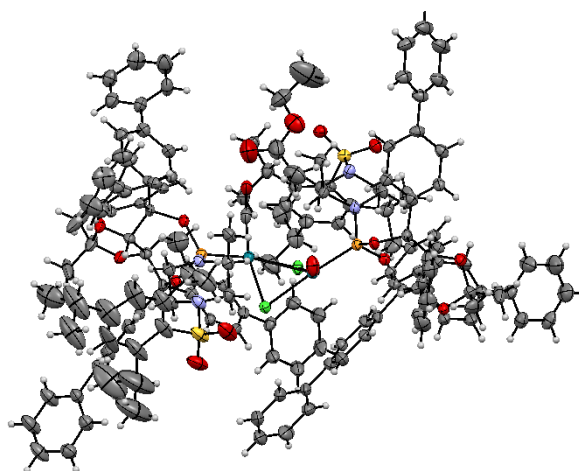

**Structure of Rh-1·EtOAc**

**Crystal data and structure refinement for Rh-1.**

|                                               |                                                                                                 |
|-----------------------------------------------|-------------------------------------------------------------------------------------------------|
| Identification code                           | 11-15                                                                                           |
| Empirical formula                             | $\text{C}_{156}\text{H}_{162}\text{Cl}_2\text{N}_4\text{O}_{16}\text{P}_2\text{Rh}_2\text{S}_2$ |
| Formula weight                                | 2751.67                                                                                         |
| Temperature/K                                 | 99.99(10)                                                                                       |
| Crystal system                                | monoclinic                                                                                      |
| Space group                                   | $\text{P2}_1$                                                                                   |
| $a/\text{\AA}$                                | 14.9883(2)                                                                                      |
| $b/\text{\AA}$                                | 34.9555(5)                                                                                      |
| $c/\text{\AA}$                                | 15.2977(2)                                                                                      |
| $\alpha/^\circ$                               | 90                                                                                              |
| $\beta/^\circ$                                | 100.2050(10)                                                                                    |
| $\gamma/^\circ$                               | 90                                                                                              |
| Volume/ $\text{\AA}^3$                        | 7888.03(19)                                                                                     |
| $Z$                                           | 2                                                                                               |
| $\rho_{\text{calc}}/\text{cm}^3$              | 1.159                                                                                           |
| $\mu/\text{mm}^{-1}$                          | 2.902                                                                                           |
| $F(000)$                                      | 2880.0                                                                                          |
| Crystal size/ $\text{mm}^3$                   | $0.12 \times 0.11 \times 0.1$                                                                   |
| Radiation                                     | $\text{Cu K}\alpha$ ( $\lambda = 1.54184$ )                                                     |
| $2\Theta$ range for data collection/ $^\circ$ | 5.056 to 147.232                                                                                |
| Index ranges                                  | $-18 \leq h \leq 16, -37 \leq k \leq 42, -18 \leq l \leq 17$                                    |
| Reflections collected                         | 31702                                                                                           |
| Independent reflections                       | 22516 [ $R_{\text{int}} = 0.0496, R_{\text{sigma}} = 0.0696$ ]                                  |

Data/restraints/parameters 22516/8/1671  
 Goodness-of-fit on F<sup>2</sup> 1.029  
 Final R indexes [ $I >= 2\sigma(I)$ ] R<sub>1</sub> = 0.0481, wR<sub>2</sub> = 0.1213  
 Final R indexes [all data] R<sub>1</sub> = 0.0517, wR<sub>2</sub> = 0.1245  
 Largest diff. peak/hole / e Å<sup>-3</sup> 0.90/-0.97  
 Flack/Hoof parameter -0.009(5)/0.008(5)

**Supplementary Table 1. Optimization of Reaction Conditions for Bromocyclization**

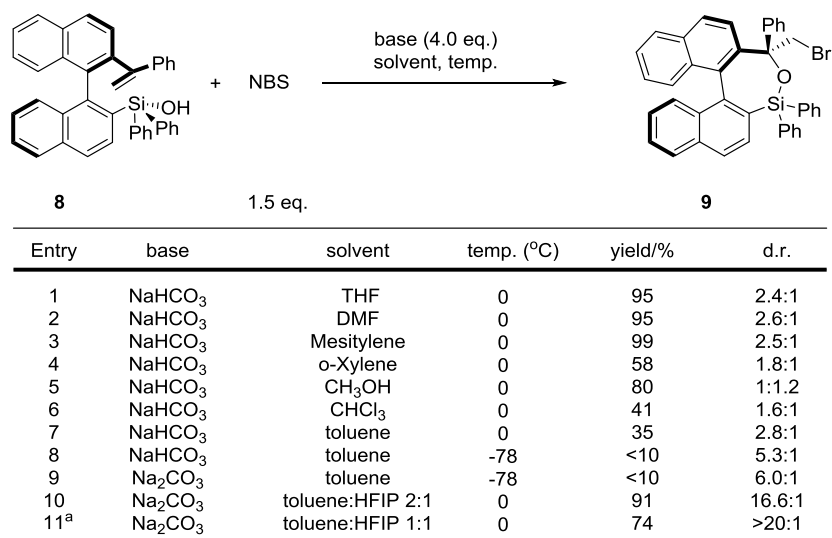

<sup>a</sup> 1.05 eq. NBS was used;

## DFT Calculations:

Computational Methods: B2PLYPD3/def2-TZVP // B3LYP-D3BJ/6-311G(d,p)

Energies are given in kcal/mol

All of the DFT calculations were performed with Gaussian 16 software packages<sup>5</sup>. The optimization calculations were employed at B3LYP level of theory<sup>6</sup> at 298.15 K with the D3 version of Grimme's dispersion (with Becke-Johnson damping)<sup>7</sup>. The 6-311G(d,p) basis sets<sup>8</sup> were employed for the C, H, Si atoms. Vibrational frequency analysis were calculated at the same level of theory to verify whether each optimized structure is an energy minimum and to evaluate its zero-point vibrational energy. All of the product structures were fully optimized without any symmetric restrictions. For each transition state, the intrinsic reaction coordinate (IRC) analysis was conducted to ensure that it connects the right reactant and product.<sup>9</sup> To obtain more accurate energies, single-point energy calculations were performed on all optimized structures applying the def2-TZVP basis set<sup>10</sup> at the B2PLYPD3 level of theory.<sup>11</sup> A standard state of 298.15 K and 1 atm was used. All discussed energies are Gibbs free energies in gas phase ( $\Delta G_g$ ).

**Supplementary Table 2. Thermal correction of Gibbs free energy (TCG, hartree) and single-point energies (E, hartree) in 298.15 K and 1 atm for all species involved in this study.**

| Compounds            | TCG       | E            | Compounds     | TCG      | E            |
|----------------------|-----------|--------------|---------------|----------|--------------|
| <b>4c</b>            | 0.194088  | -830.318409  | <b>4c''</b>   | 0.072747 | -231.817104  |
| <b>H<sub>2</sub></b> | -0.001444 | -1.159449    | <b>4a'</b>    | 0.297727 | -1138.239765 |
| <b>4c-HH</b>         | 0.211558  | -831.490834  | <b>4a'-H</b>  | 0.179531 | -754.224730  |
| <b>(R)-4a</b>        | 0.281270  | -1137.034077 | <b>4a''</b>   | 0.115796 | -385.185538  |
| <b>4a-HH</b>         | 0.298668  | -1138.226462 | <b>(S)-4a</b> | 0.281286 | -1137.034072 |
| <b>4c'</b>           | 0.210317  | -831.501312  | <b>TS-rs</b>  | 0.280614 | -1137.000971 |
| <b>4c'-H</b>         | 0.136044  | -600.855605  |               |          |              |

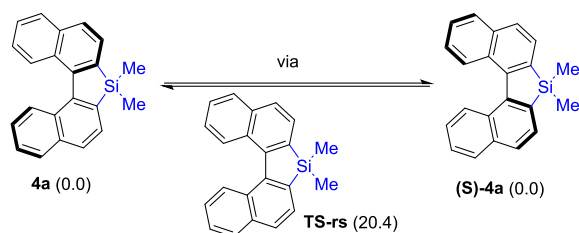

According to the Eyring equation:

$$k = \frac{k_B T}{h} e^{\frac{-\Delta G}{RT}}$$

The reaction rate for the racemization of **4a**:

$$k = 7.4\text{E-}3 \text{ s}^{-1}$$

For this rotation process is a first-order reaction, Equation relates half-life to rate constant for first order reactions:

$$t_{1/2} = \frac{\ln 2}{k} \approx 94 \text{ s}$$

## Copies of NMR Spectroscopies

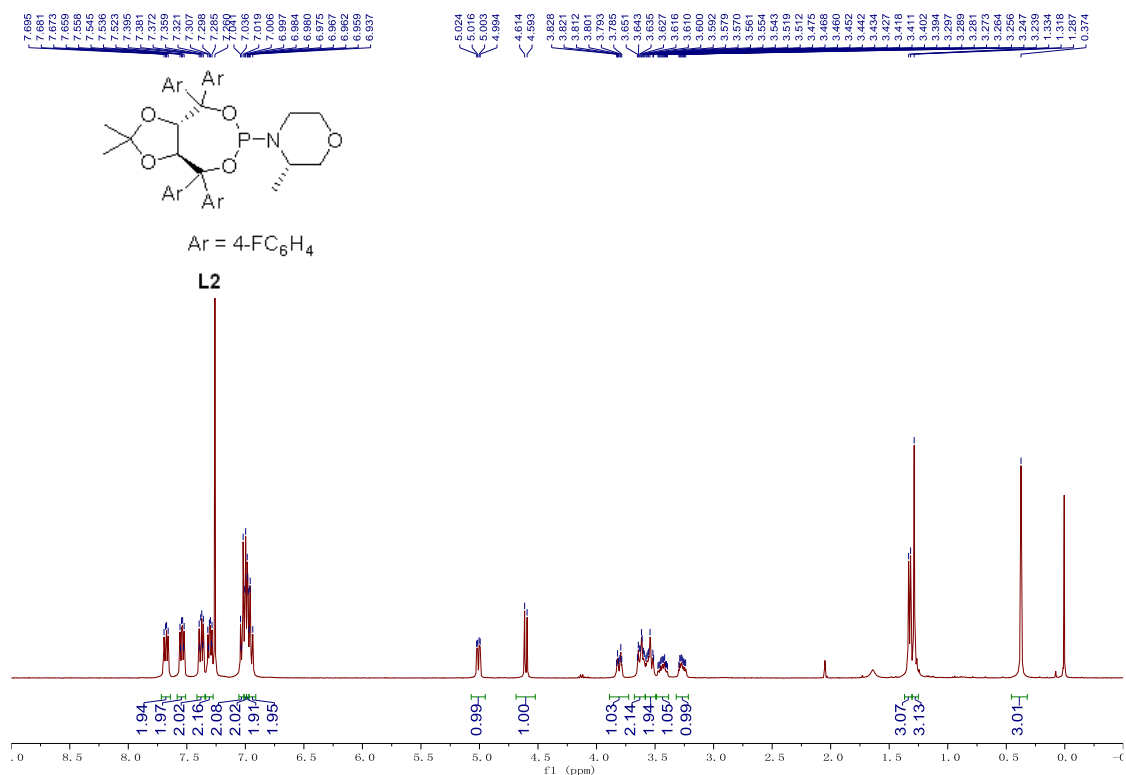

Supplementary Figure 1. <sup>1</sup>H NMR spectroscopy of L2

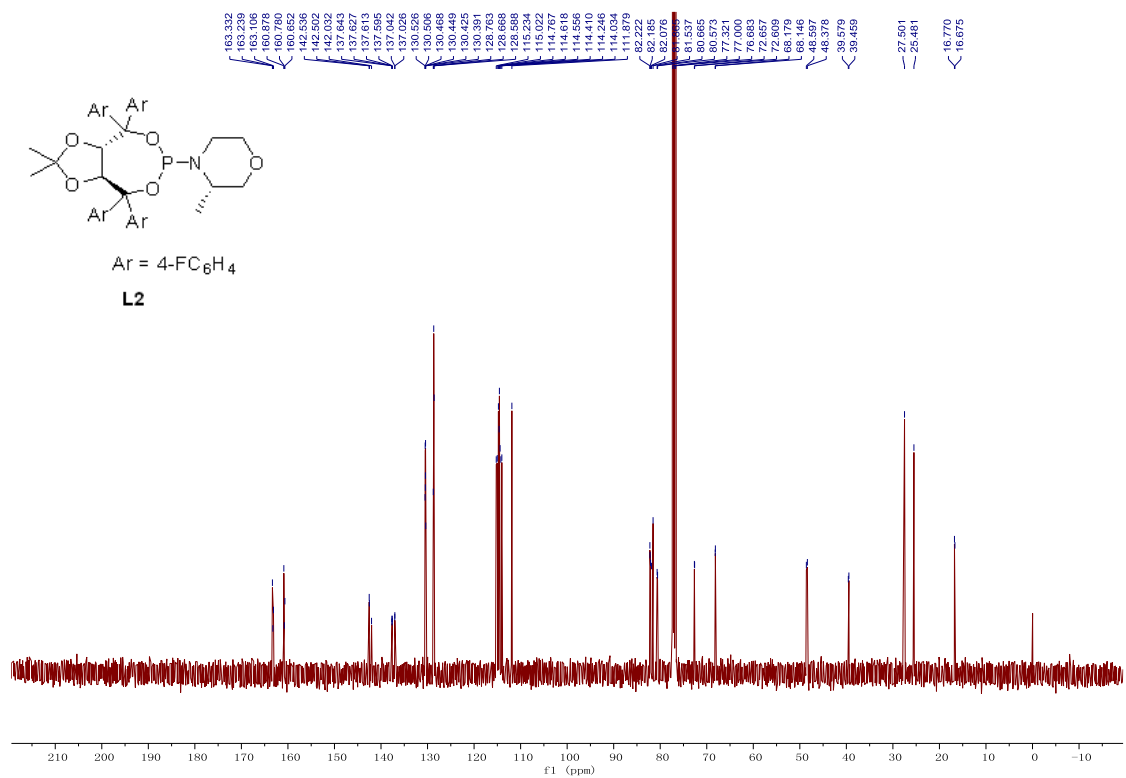

Supplementary Figure 2. <sup>13</sup>C NMR spectroscopy of L2



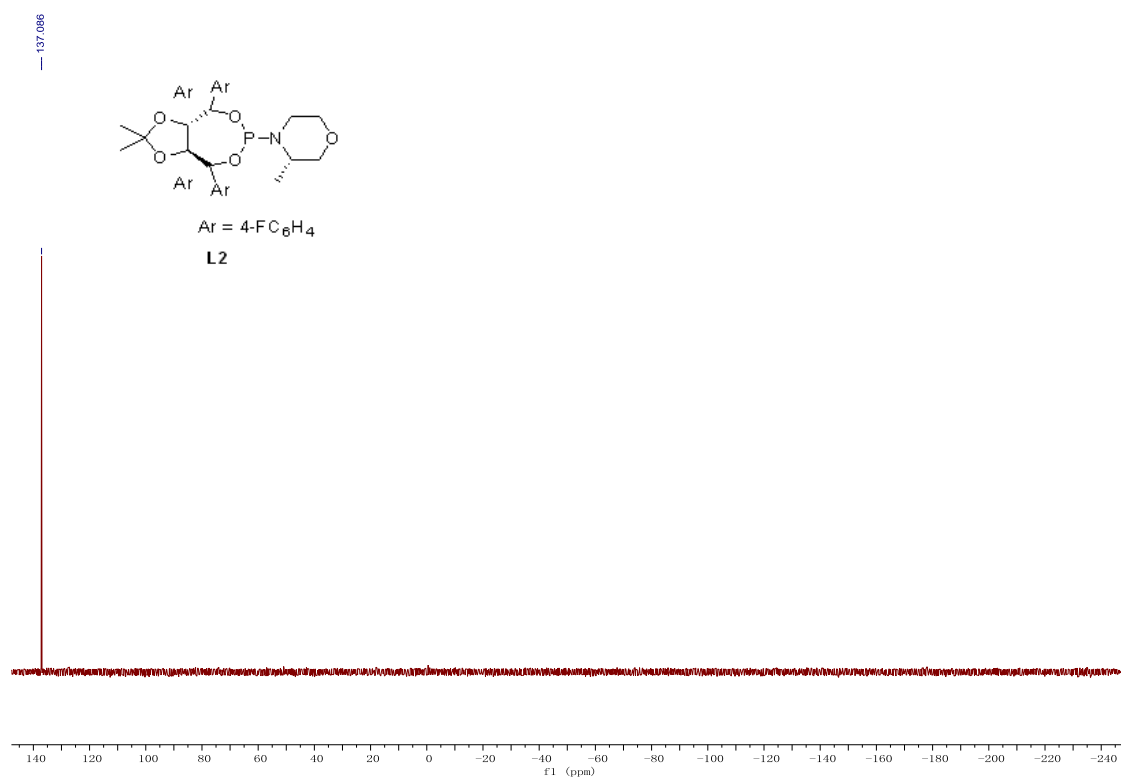

Supplementary Figure 3. <sup>31</sup>P NMR spectroscopy of L2

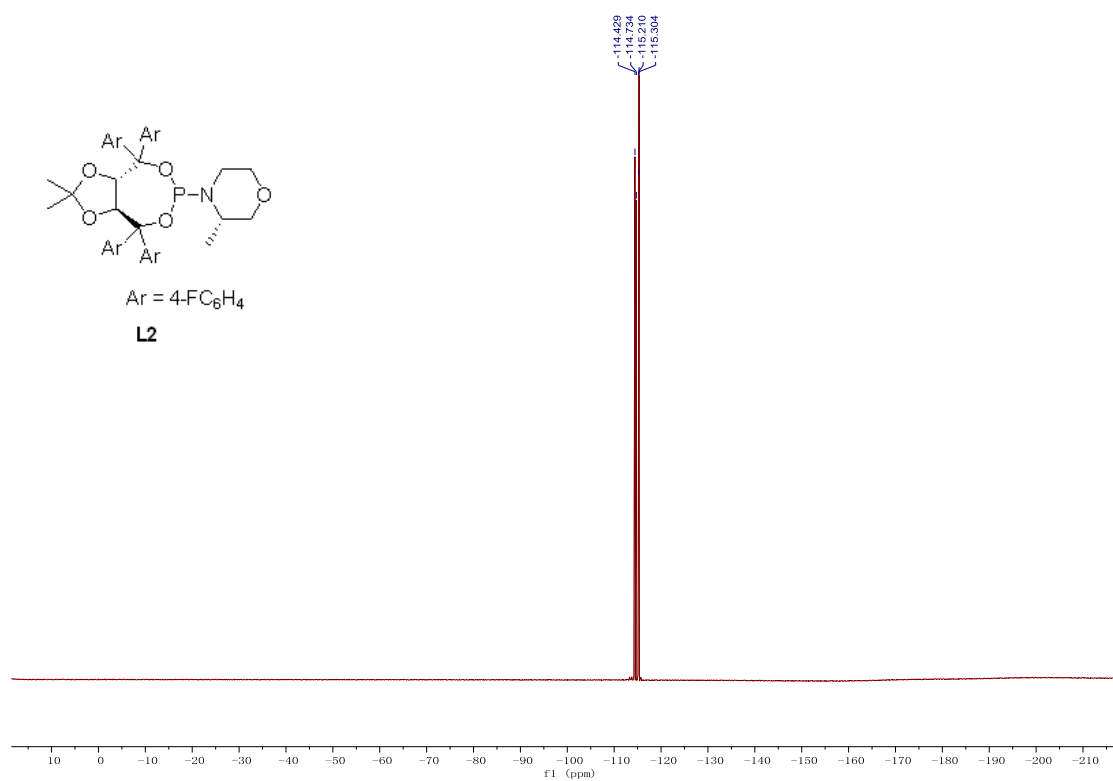

Supplementary Figure 4. <sup>19</sup>F NMR spectroscopy of L2

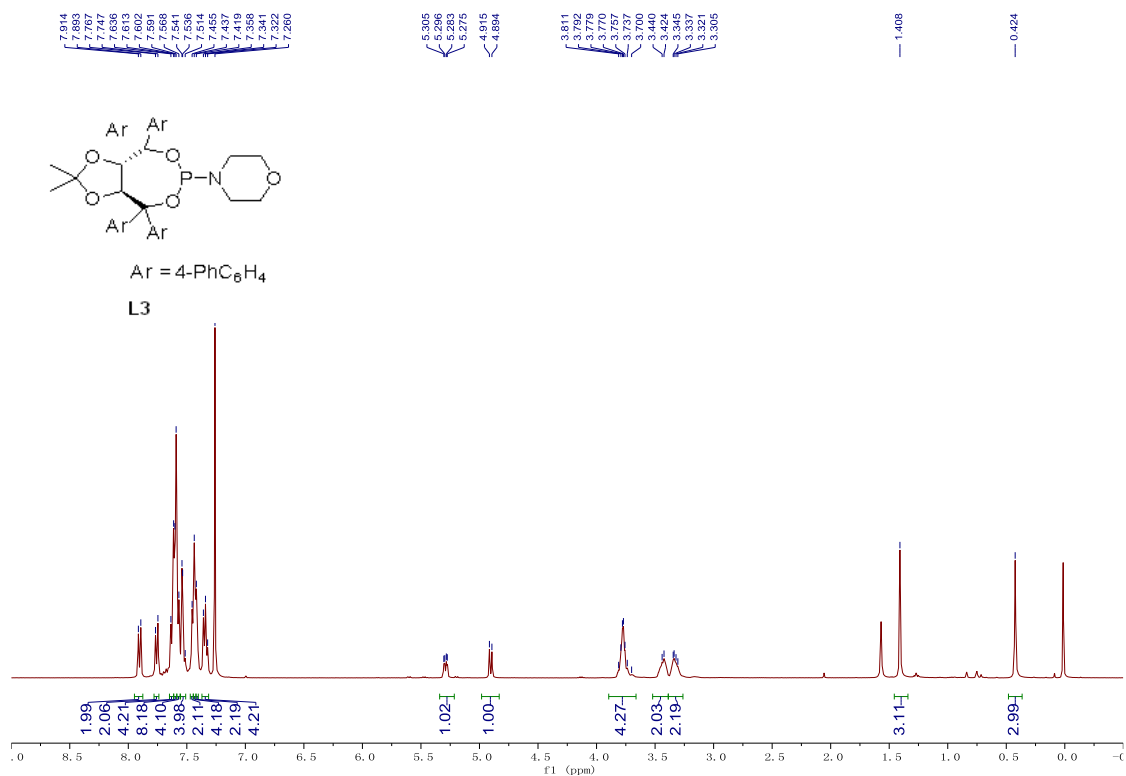

Supplementary Figure 5. <sup>1</sup>H NMR spectroscopy of L3

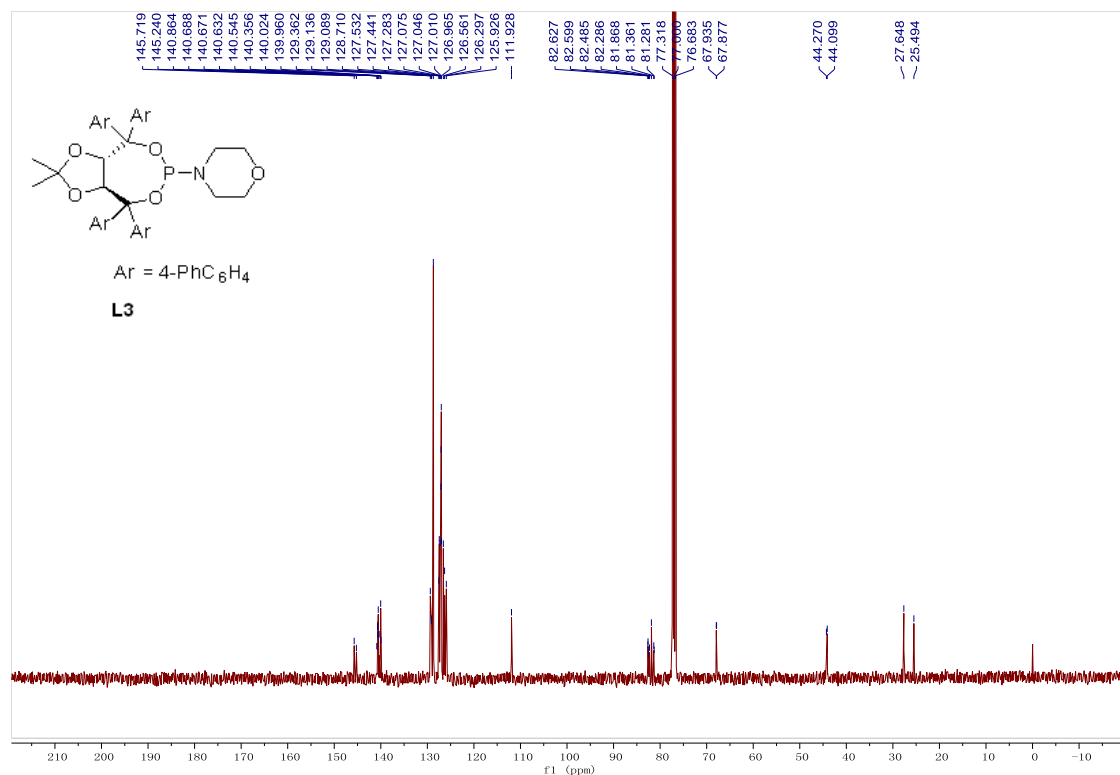

Supplementary Figure 6. <sup>13</sup>C NMR spectroscopy of L3

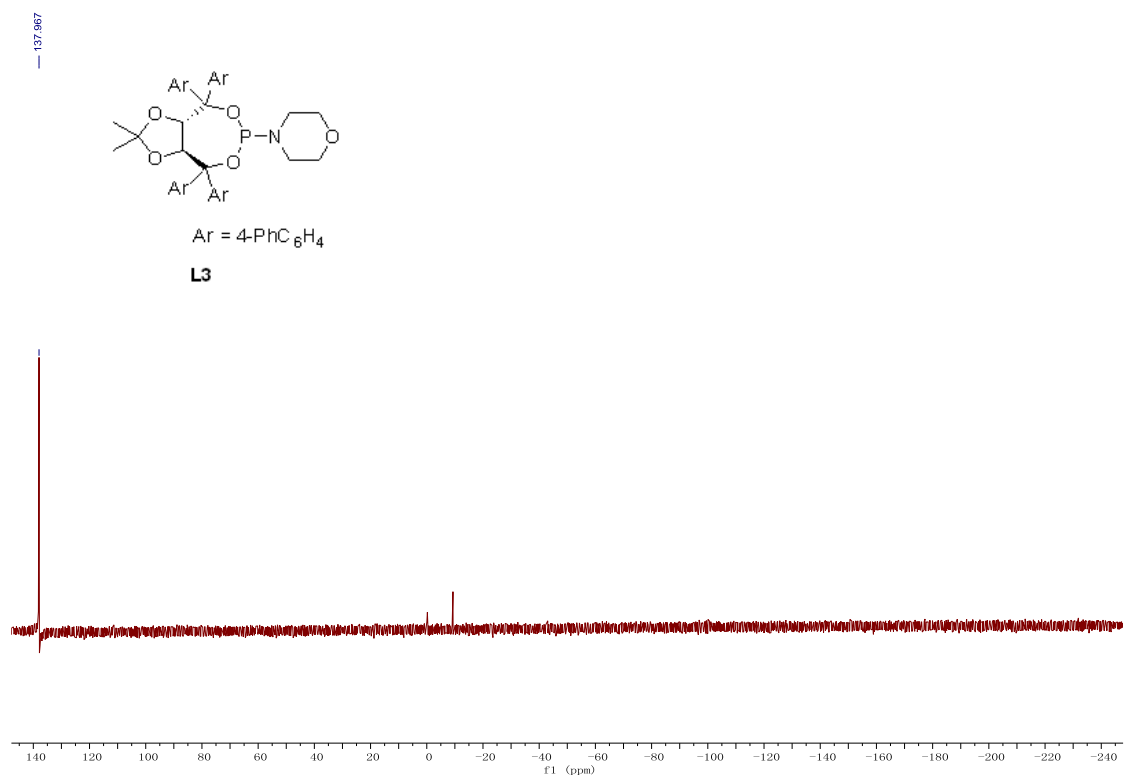

Supplementary Figure 7. <sup>31</sup>P NMR spectroscopy of L3

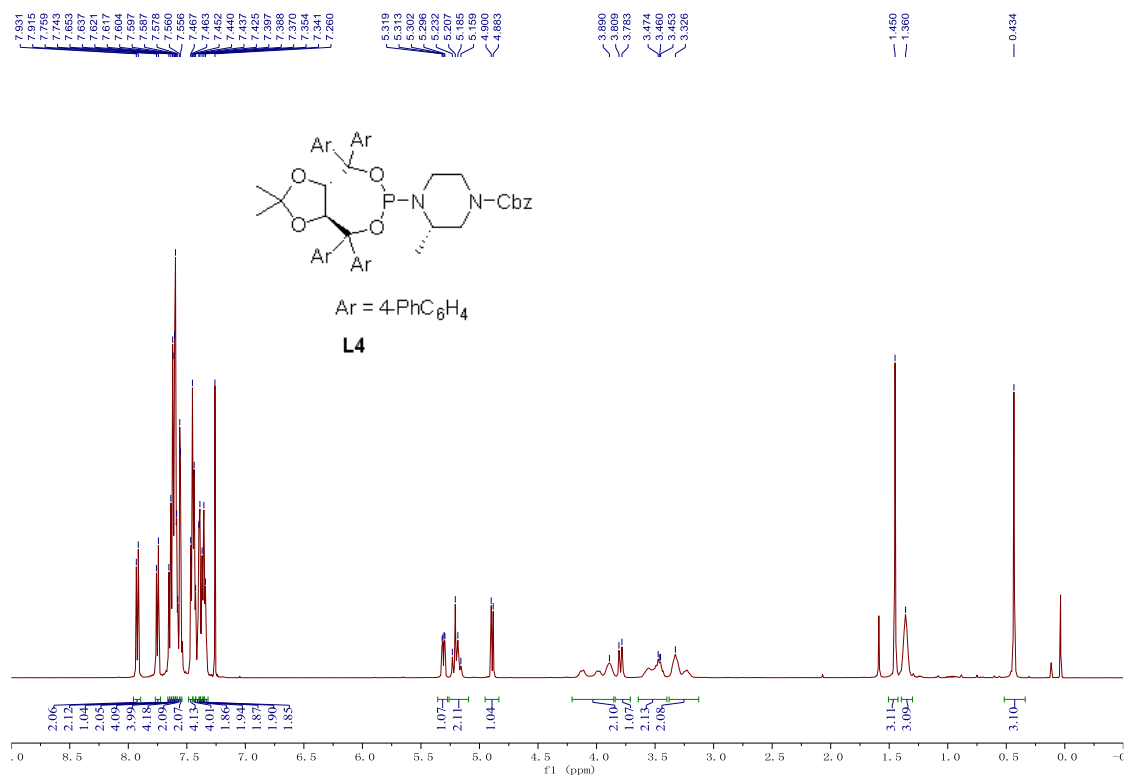

Supplementary Figure 8. <sup>1</sup>H NMR spectroscopy of L4

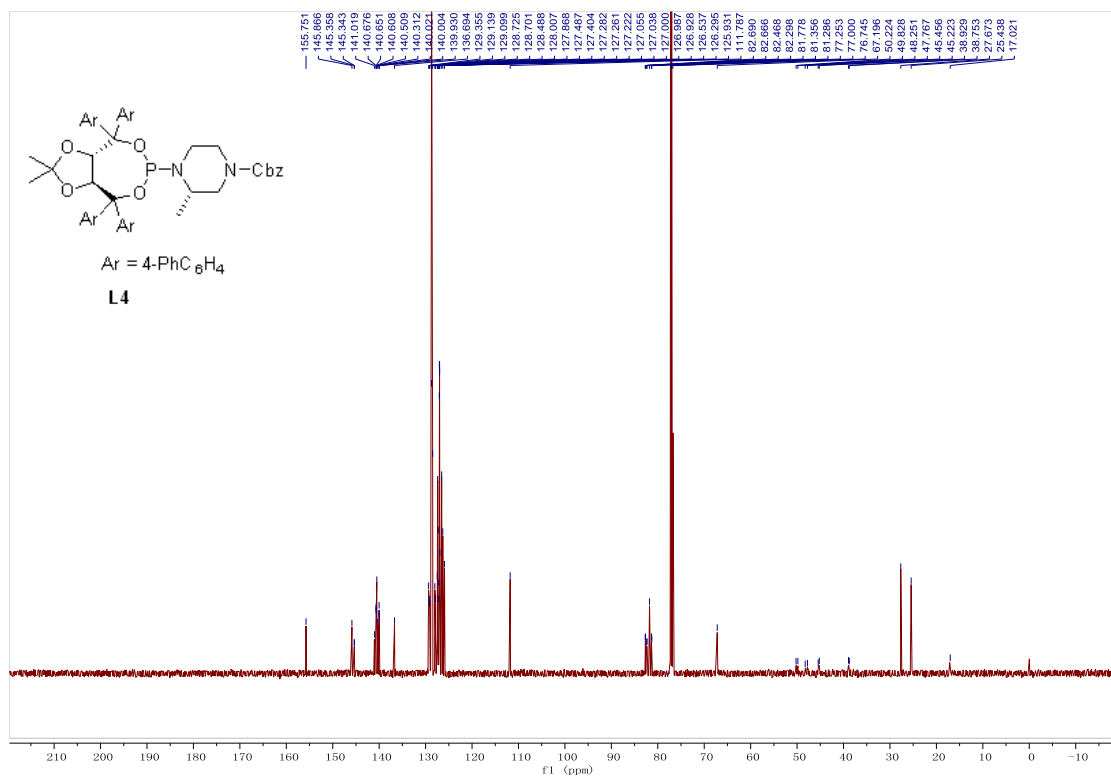

Supplementary Figure 9. <sup>13</sup>C NMR spectroscopy of **L4**

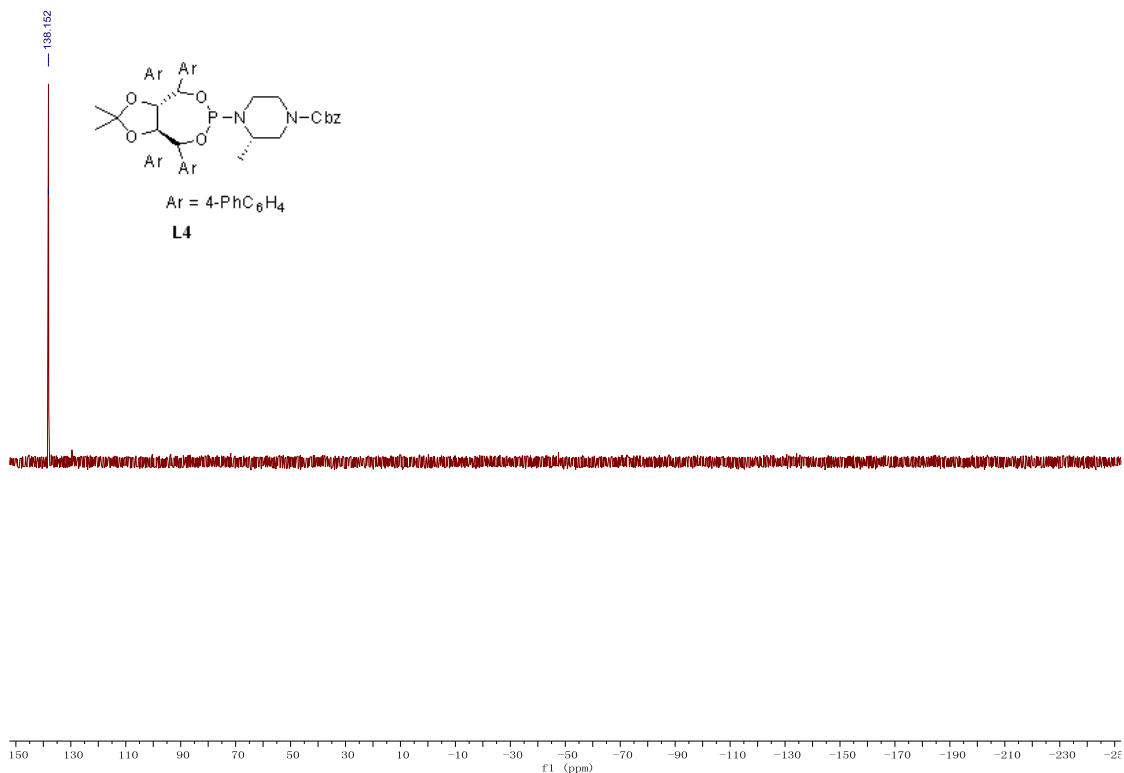

Supplementary Figure 10. <sup>31</sup>P NMR spectroscopy of **L4**

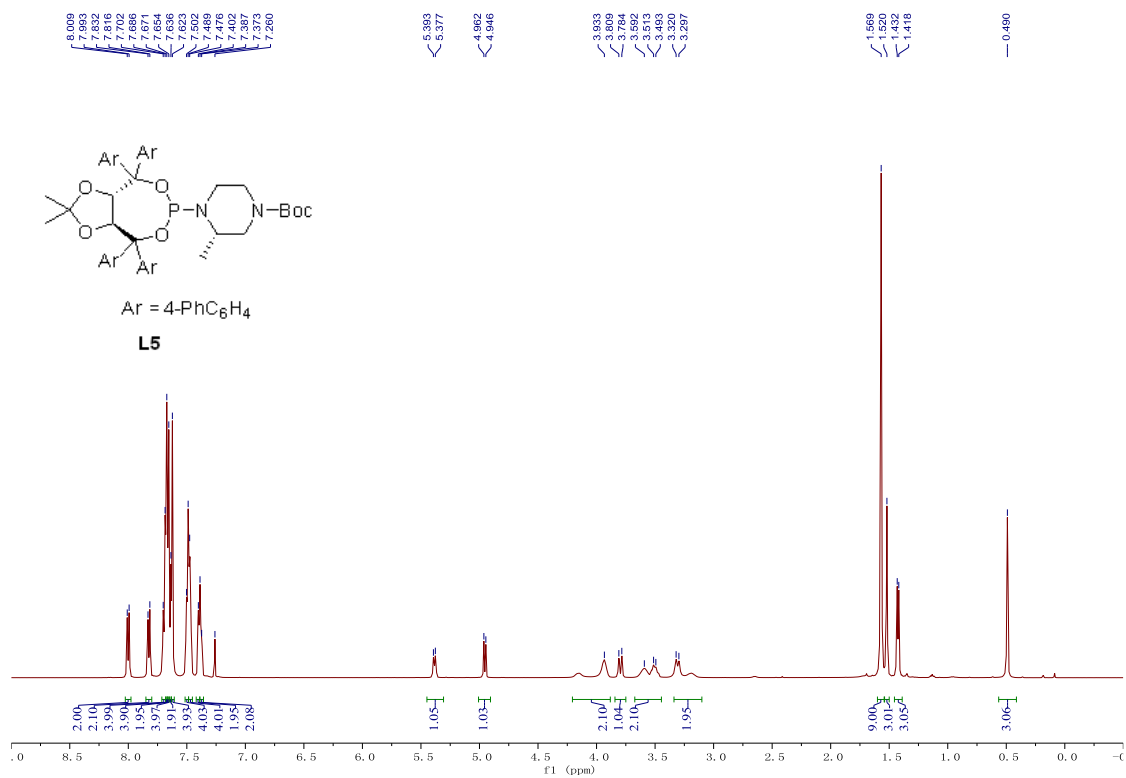

Supplementary Figure 11. <sup>1</sup>H NMR spectroscopy of L5

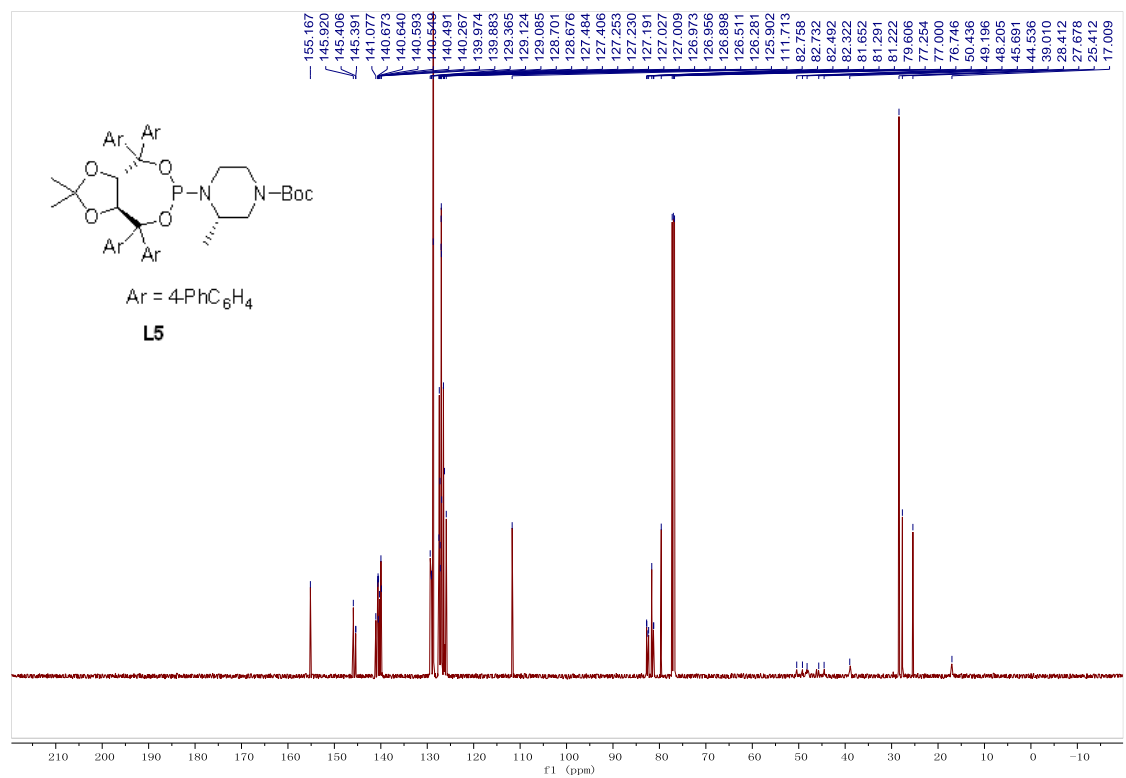

Supplementary Figure 12. <sup>13</sup>C NMR spectroscopy of L5

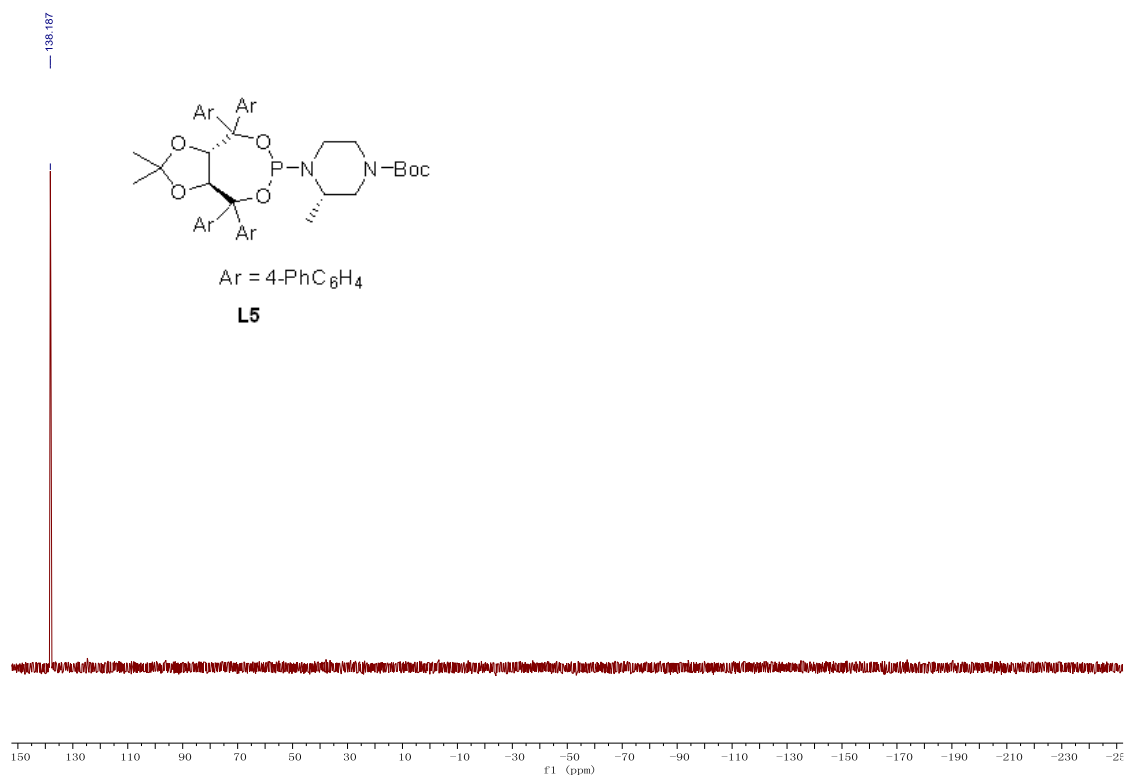

Supplementary Figure 13. <sup>31</sup>P NMR spectroscopy of L5

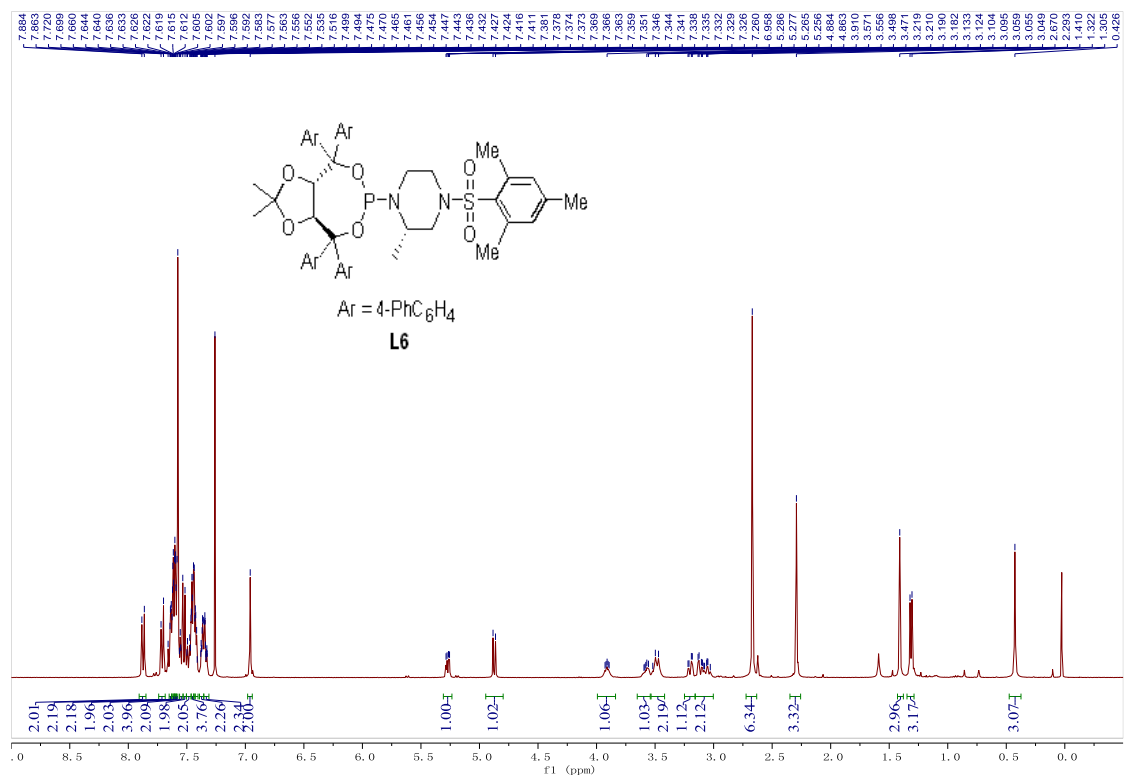

Supplementary Figure 14. <sup>1</sup>H NMR spectroscopy of L6

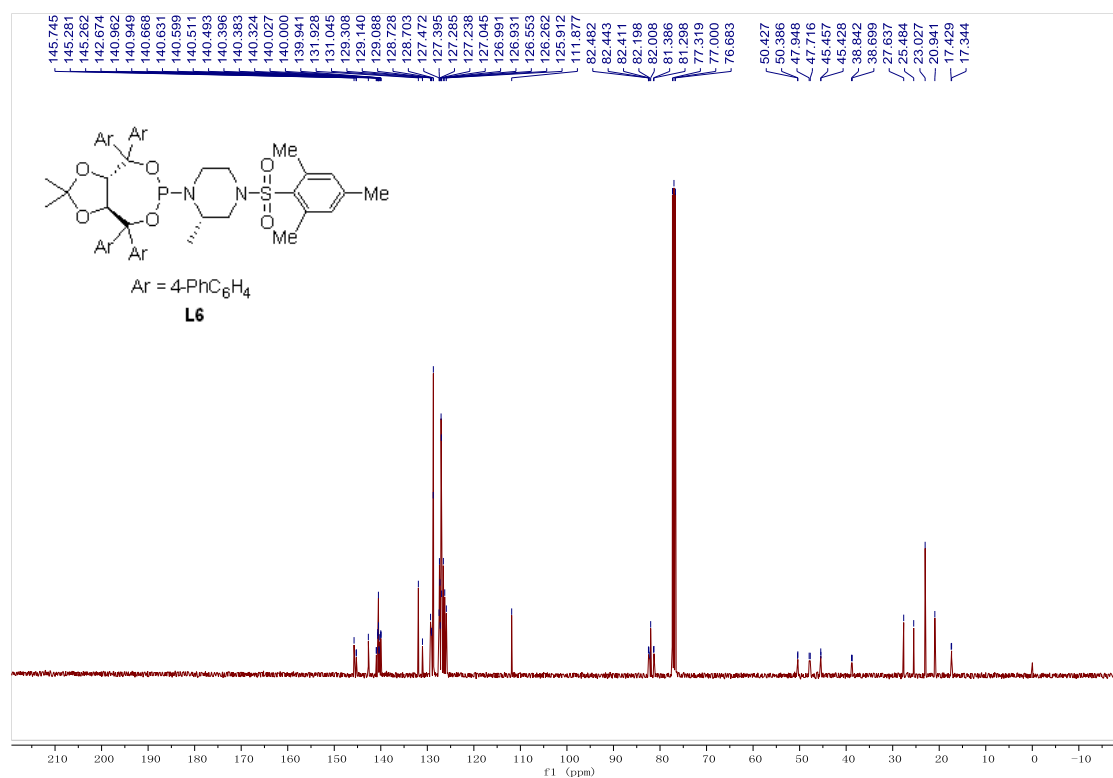

Supplementary Figure 15. <sup>13</sup>C NMR spectroscopy of L6

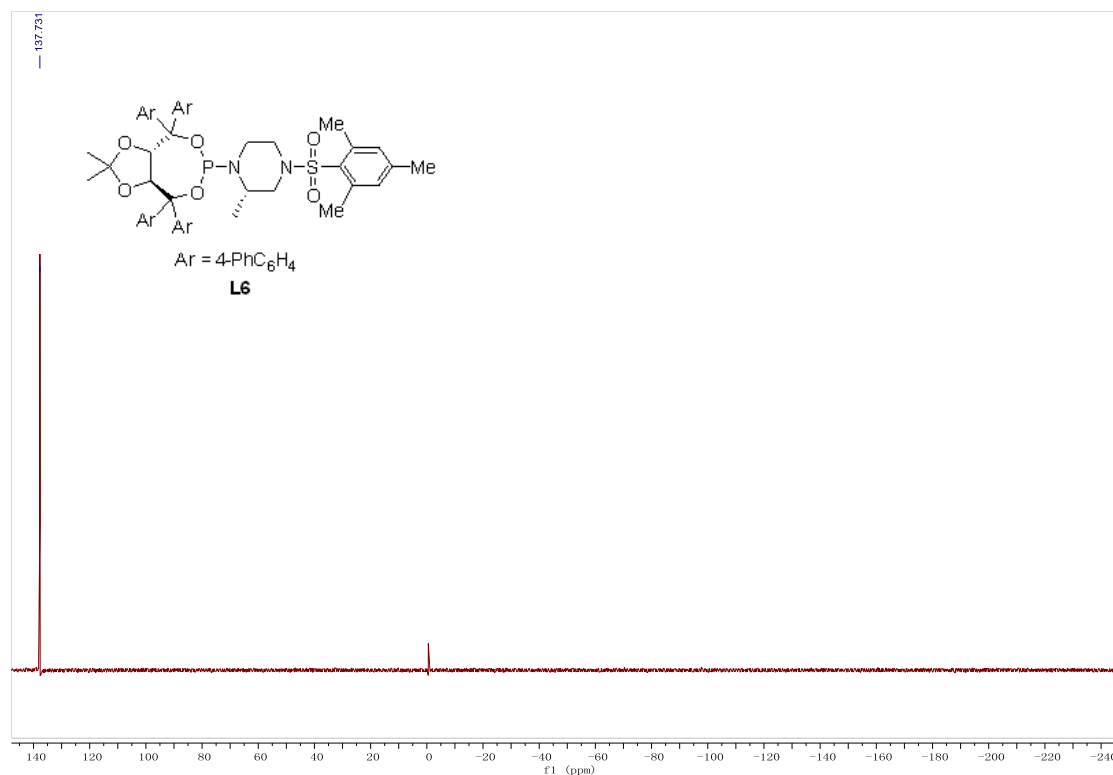

Supplementary Figure 16. <sup>31</sup>P NMR spectroscopy of L6

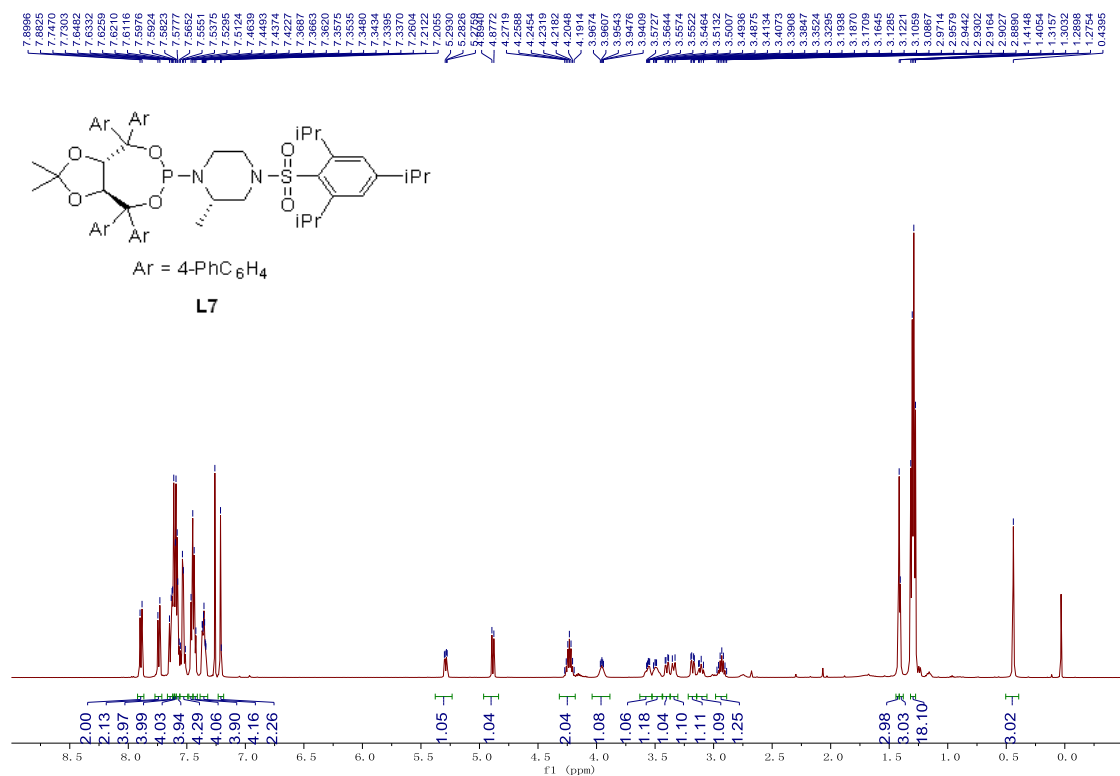

Supplementary Figure 17. <sup>1</sup>H NMR spectroscopy of L7

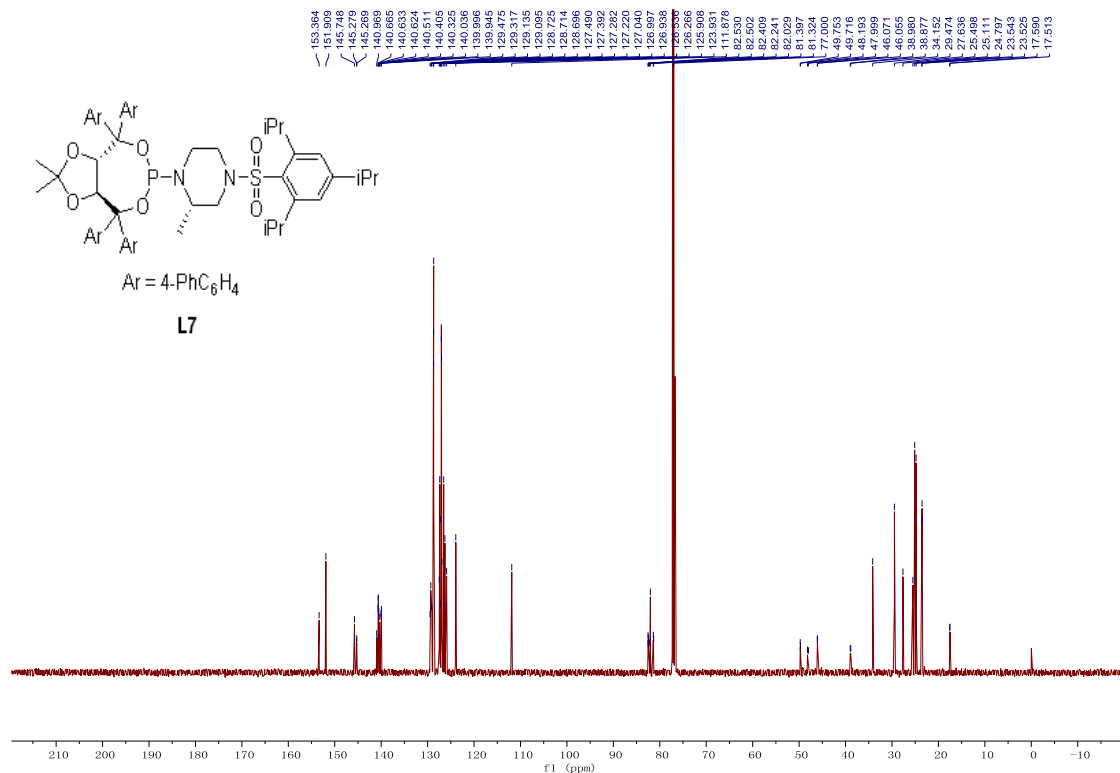

Supplementary Figure 18. <sup>13</sup>C NMR spectroscopy of L7



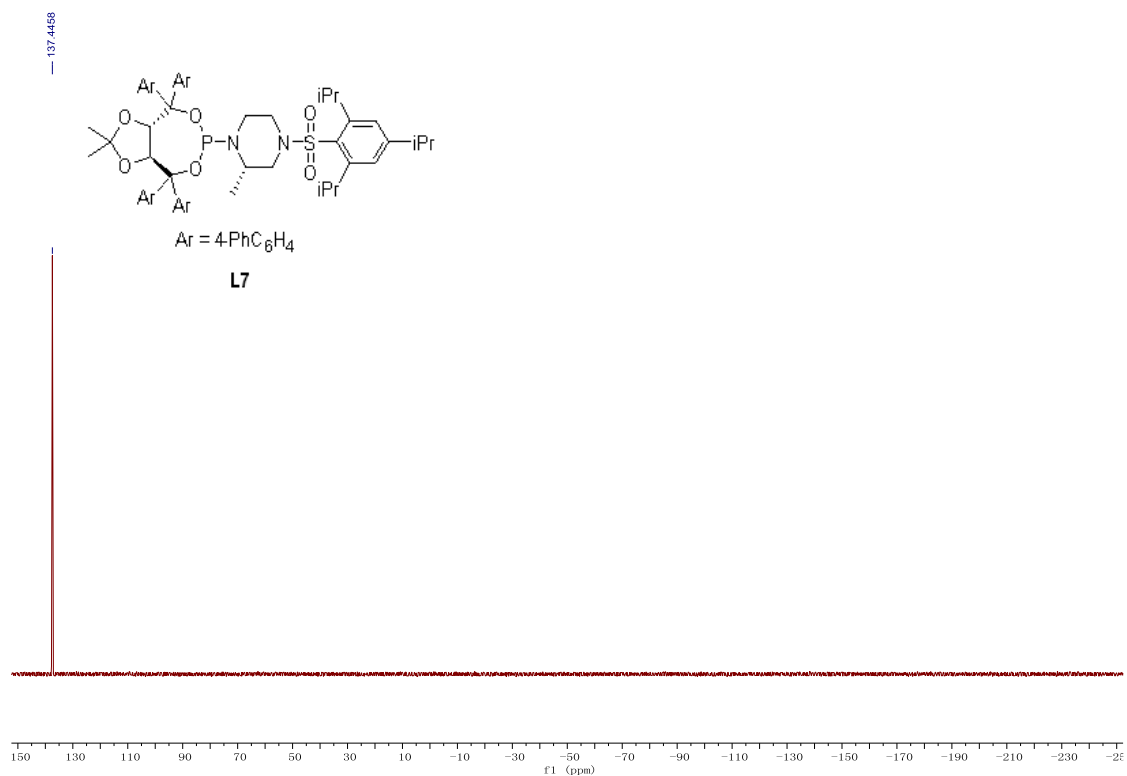

Supplementary Figure 19. <sup>31</sup>P NMR spectroscopy of **L7**

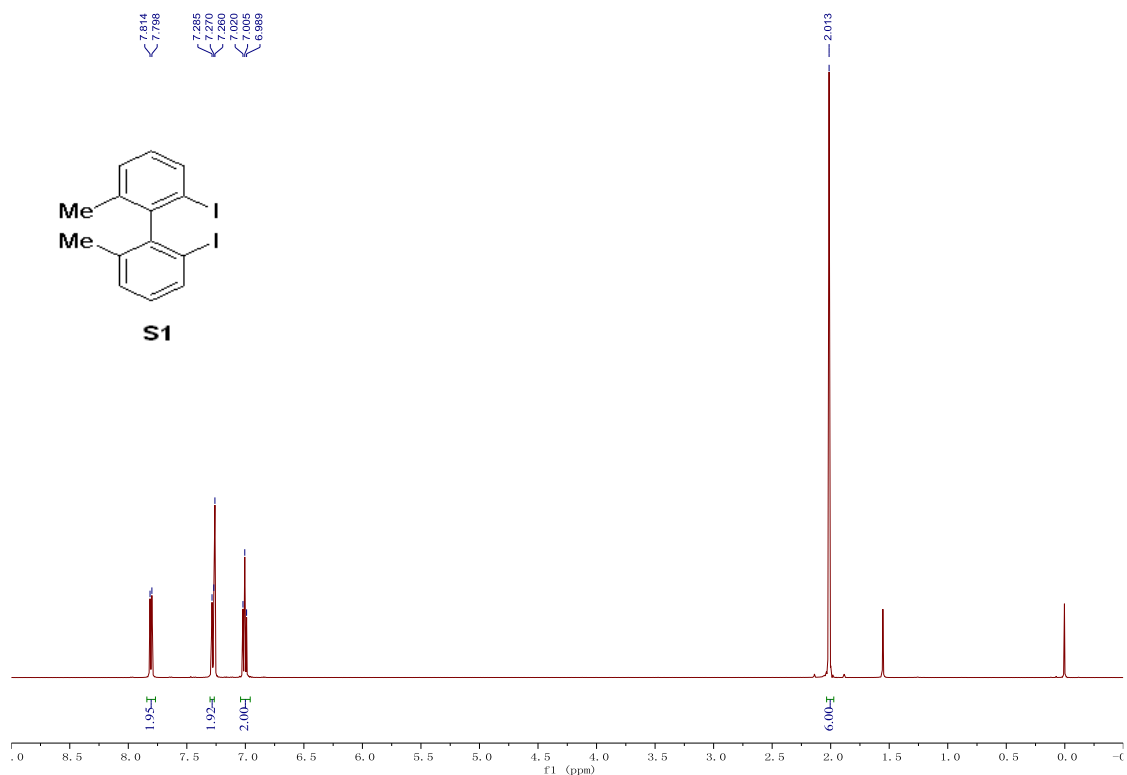

Supplementary Figure 20. <sup>1</sup>H NMR spectroscopy of **S1**

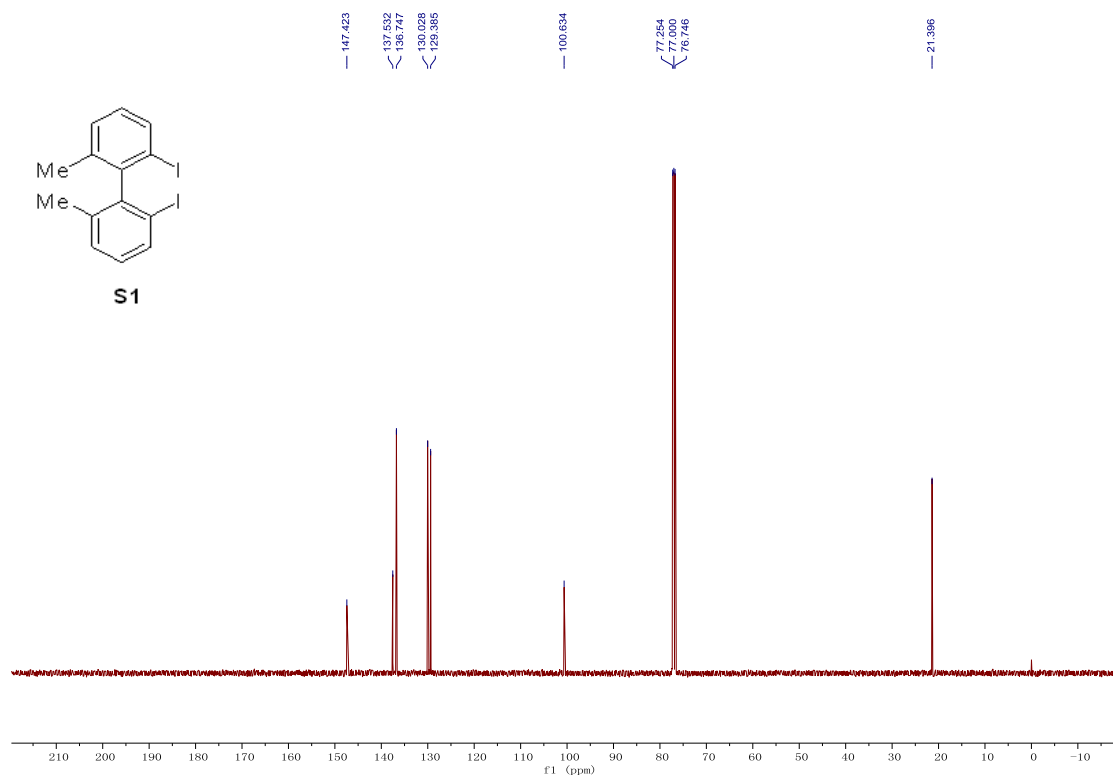

Supplementary Figure 21.  $^{13}\text{C}$  NMR spectroscopy of S1

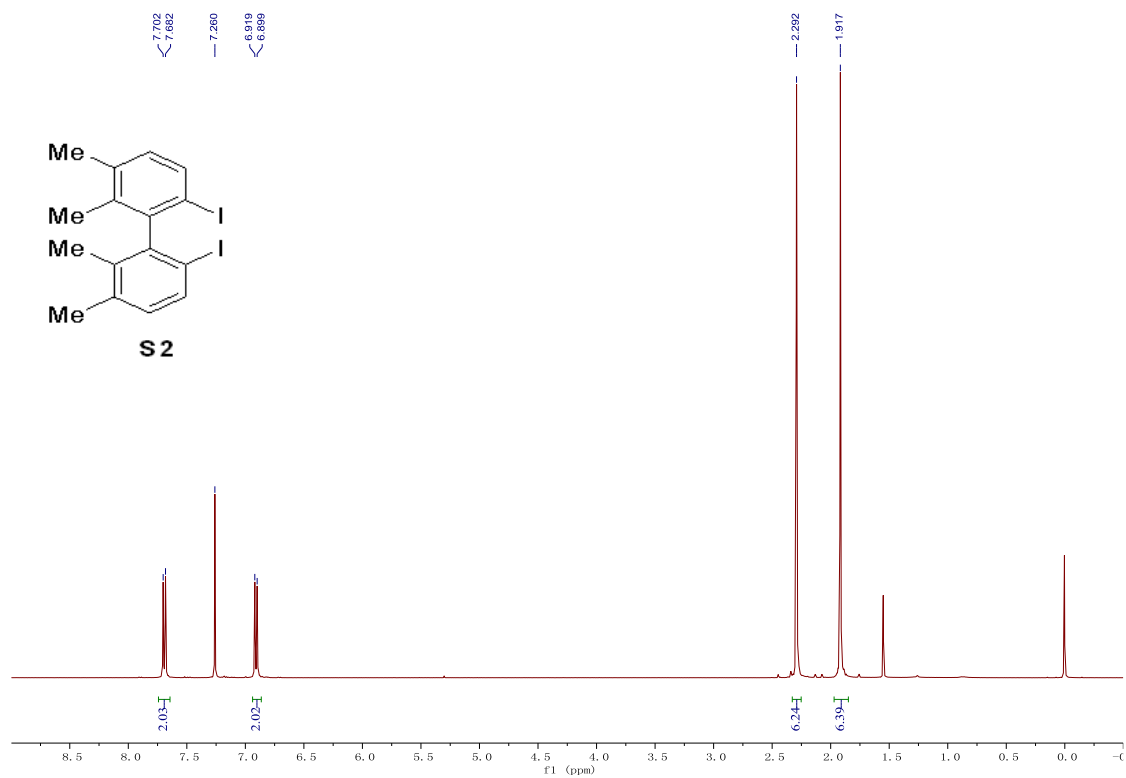

Supplementary Figure 22.  $^1\text{H}$  NMR spectroscopy of S2

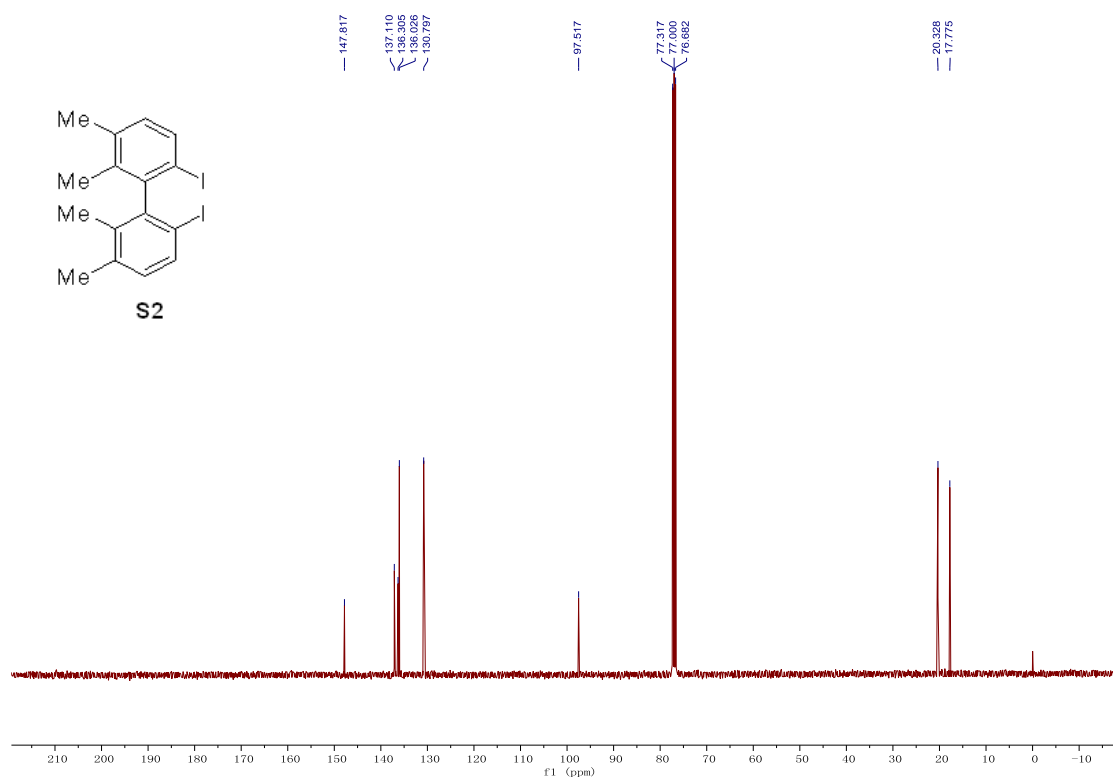

Supplementary Figure 23.  $^{13}\text{C}$  NMR spectroscopy of S2

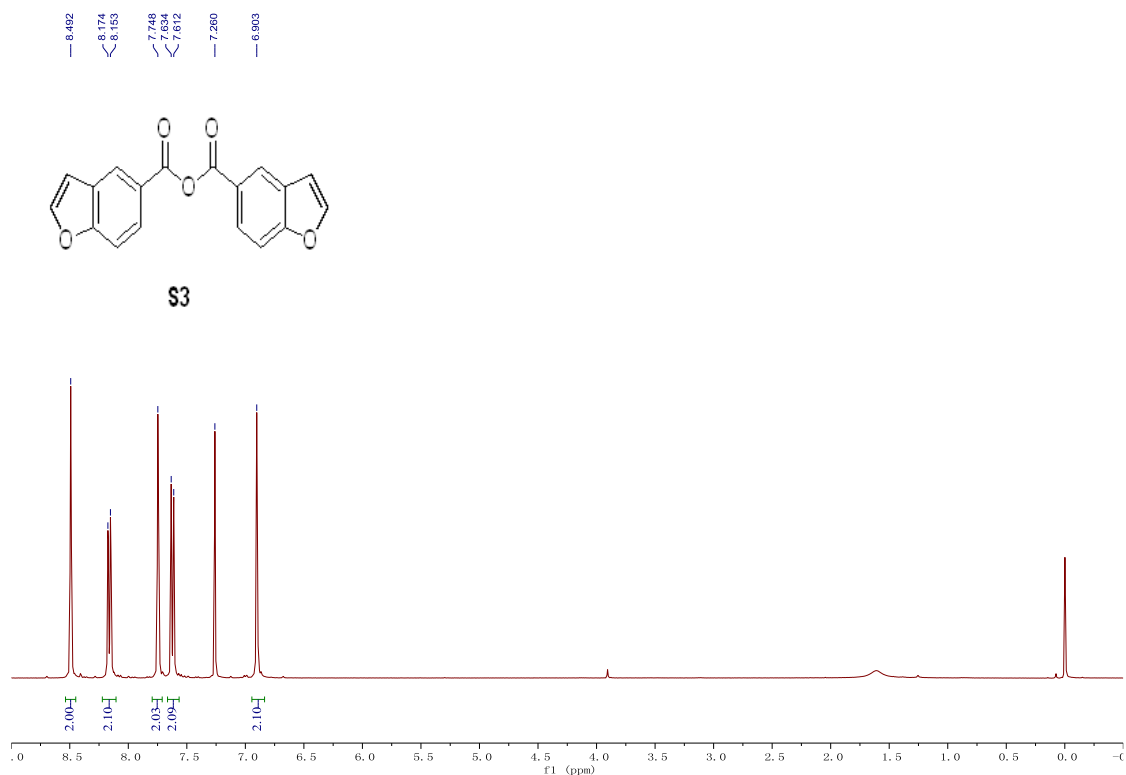

Supplementary Figure 24.  $^1\text{H}$  NMR spectroscopy of S3

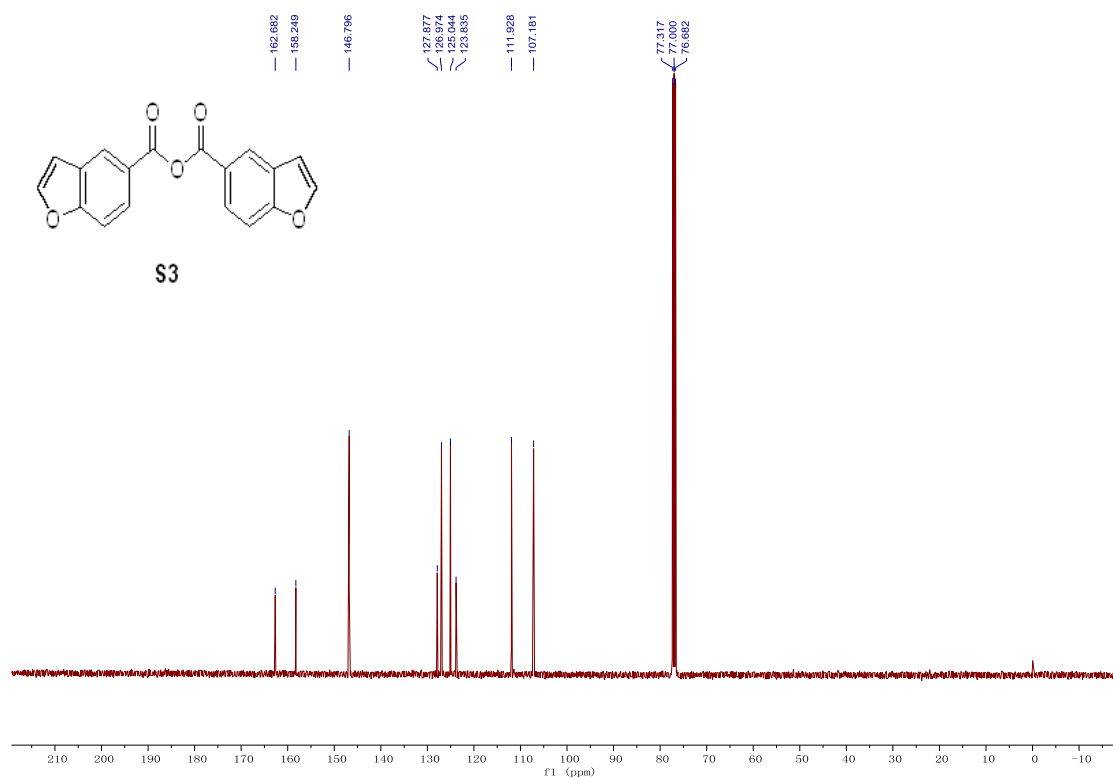

Supplementary Figure 25.  $^{13}\text{C}$  NMR spectroscopy of S3

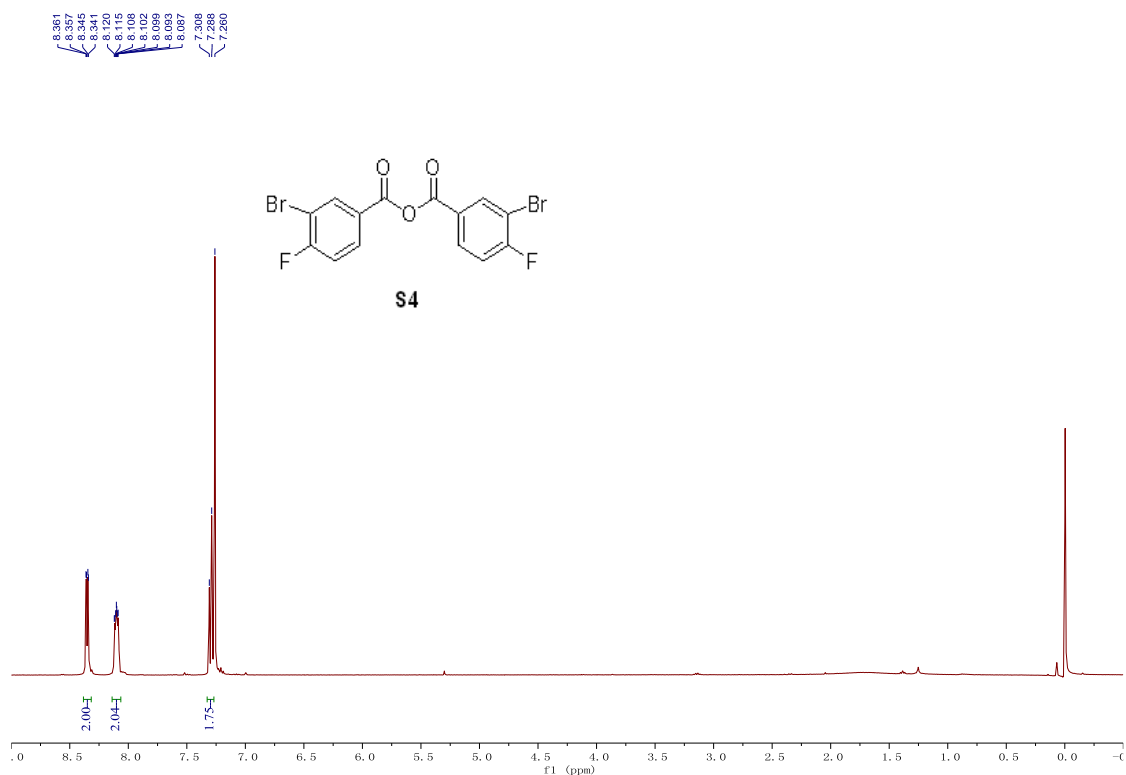

Supplementary Figure 26.  $^1\text{H}$  NMR spectroscopy of S4

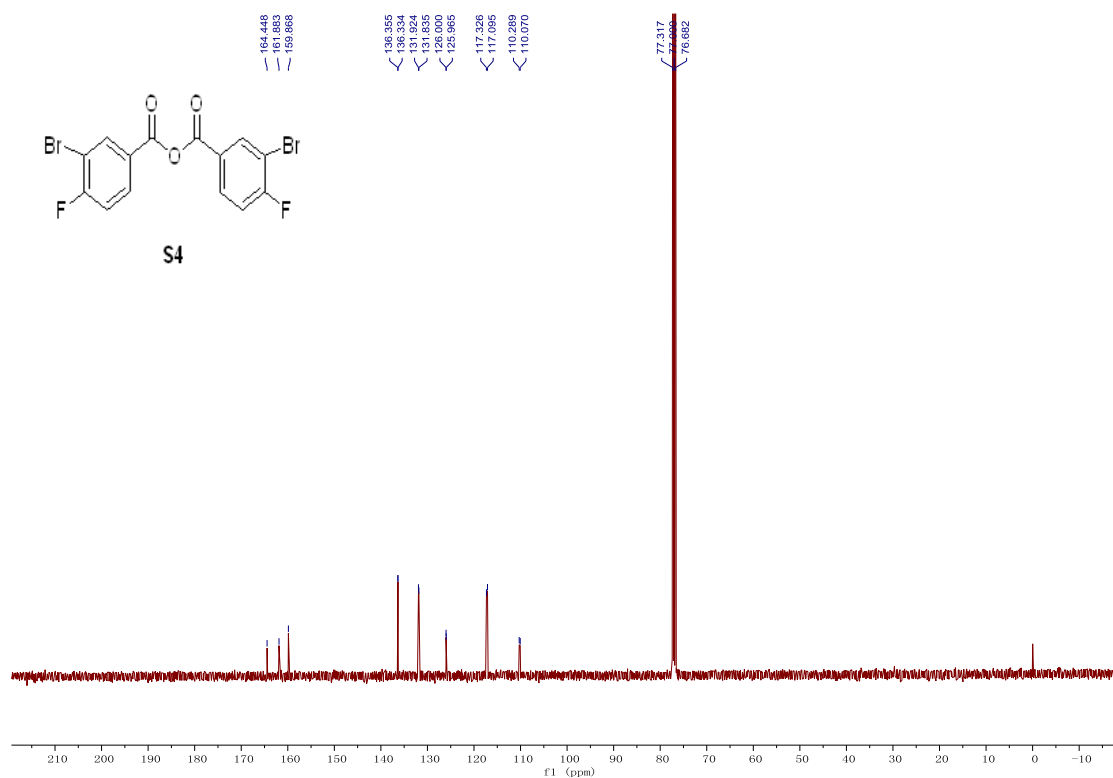

Supplementary Figure 27. <sup>13</sup>C NMR spectroscopy of S4

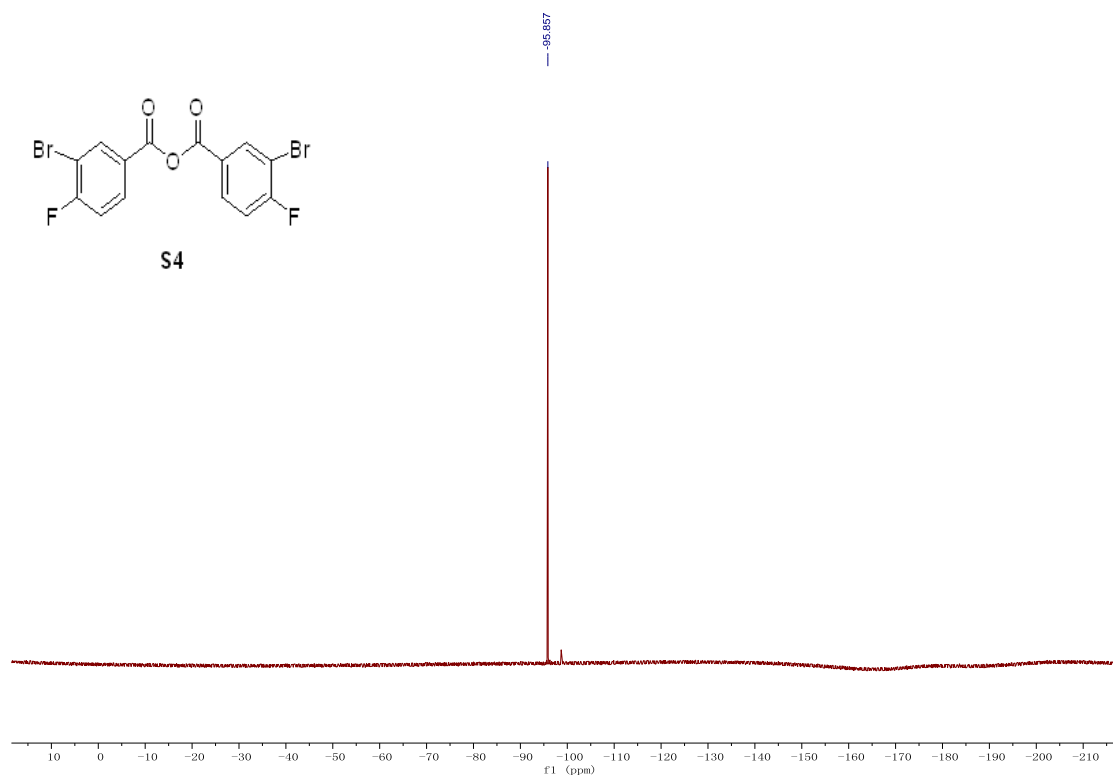

Supplementary Figure 28. <sup>19</sup>F NMR spectroscopy of S4

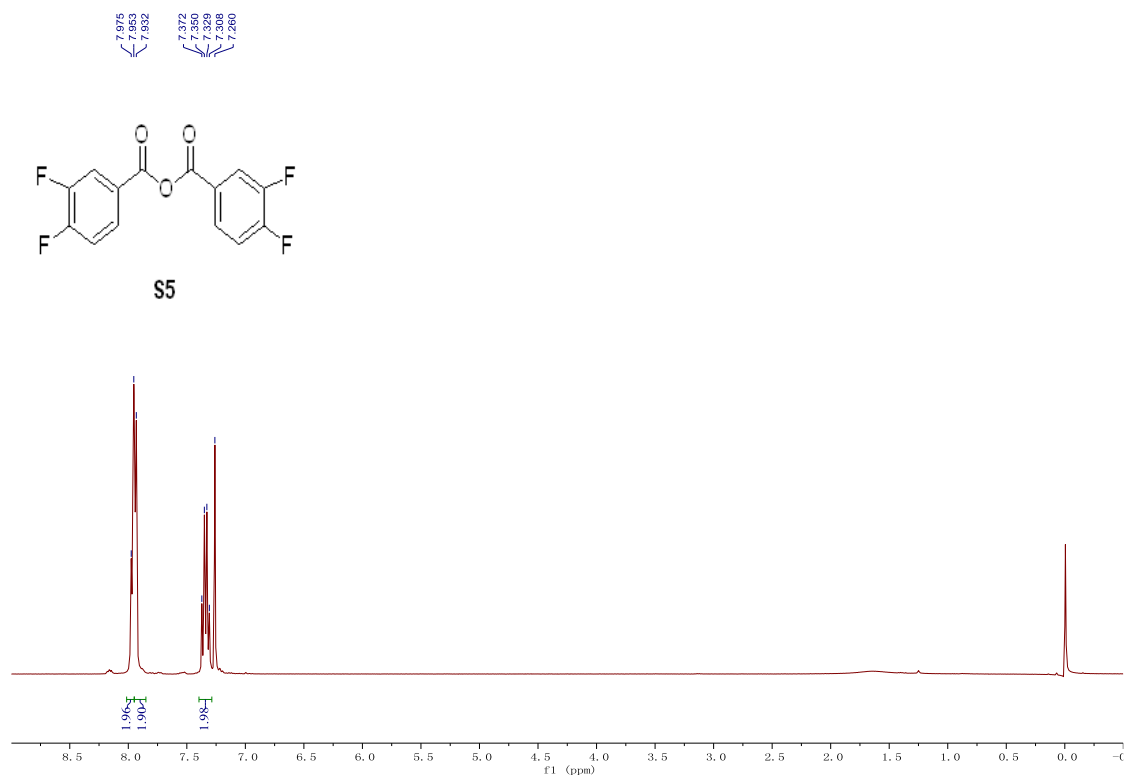

Supplementary Figure 29.  $^1\text{H}$  NMR spectroscopy of S5

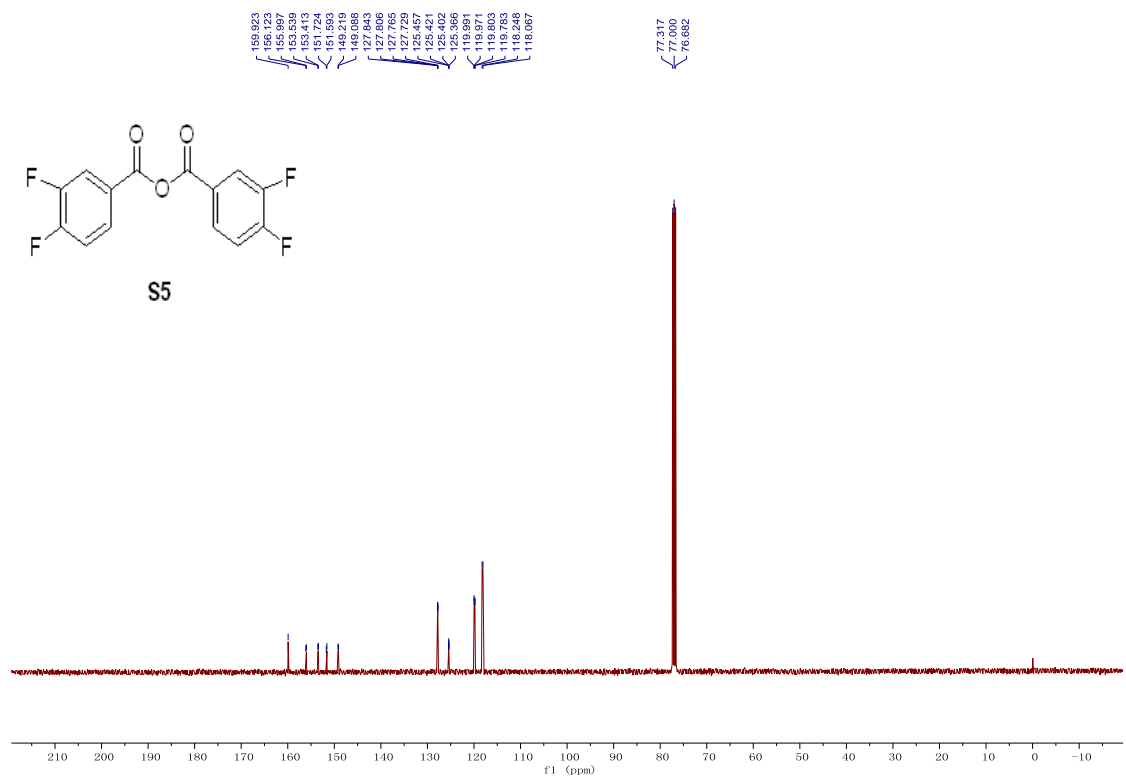

Supplementary Figure 30.  $^{13}\text{C}$  NMR spectroscopy of S5

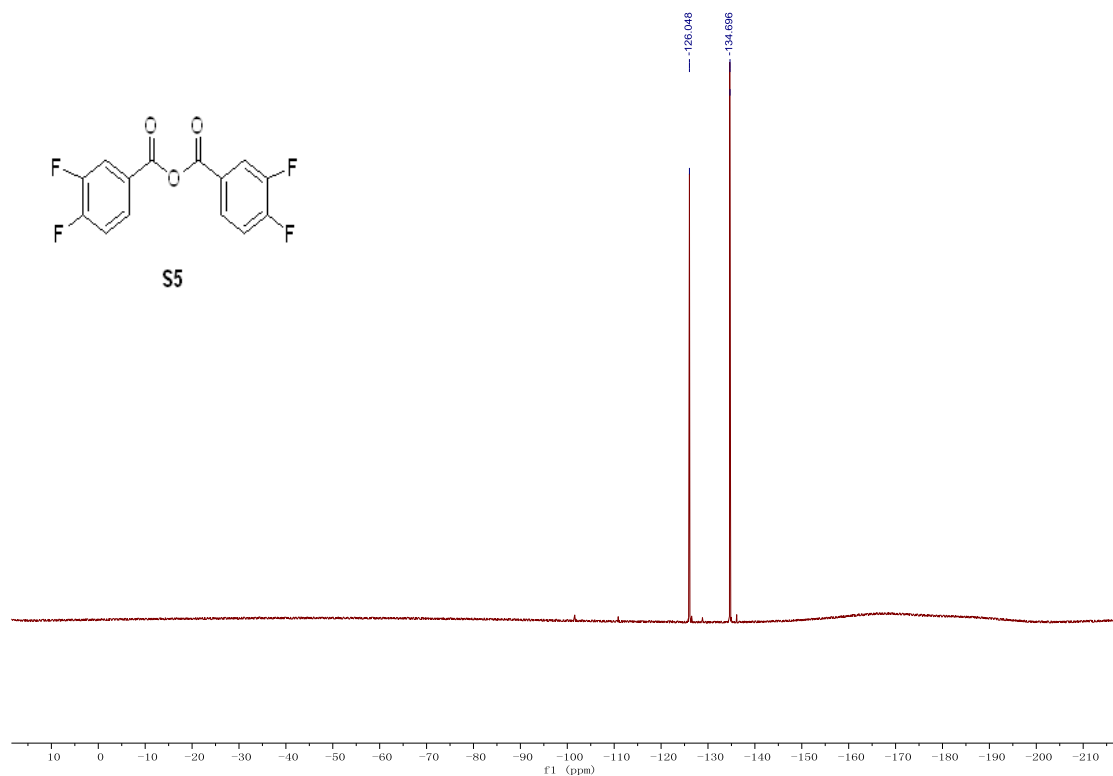

Supplementary Figure 31. <sup>19</sup>F NMR spectroscopy of S5

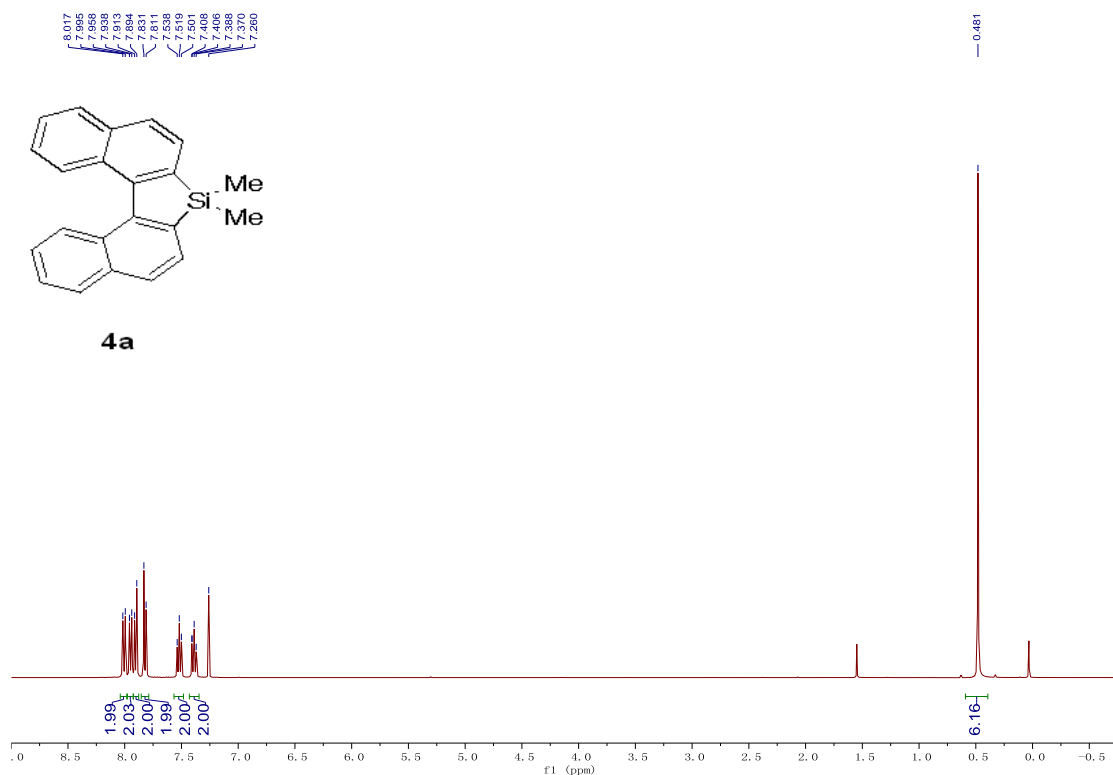

Supplementary Figure 32. <sup>1</sup>H NMR spectroscopy of 4a

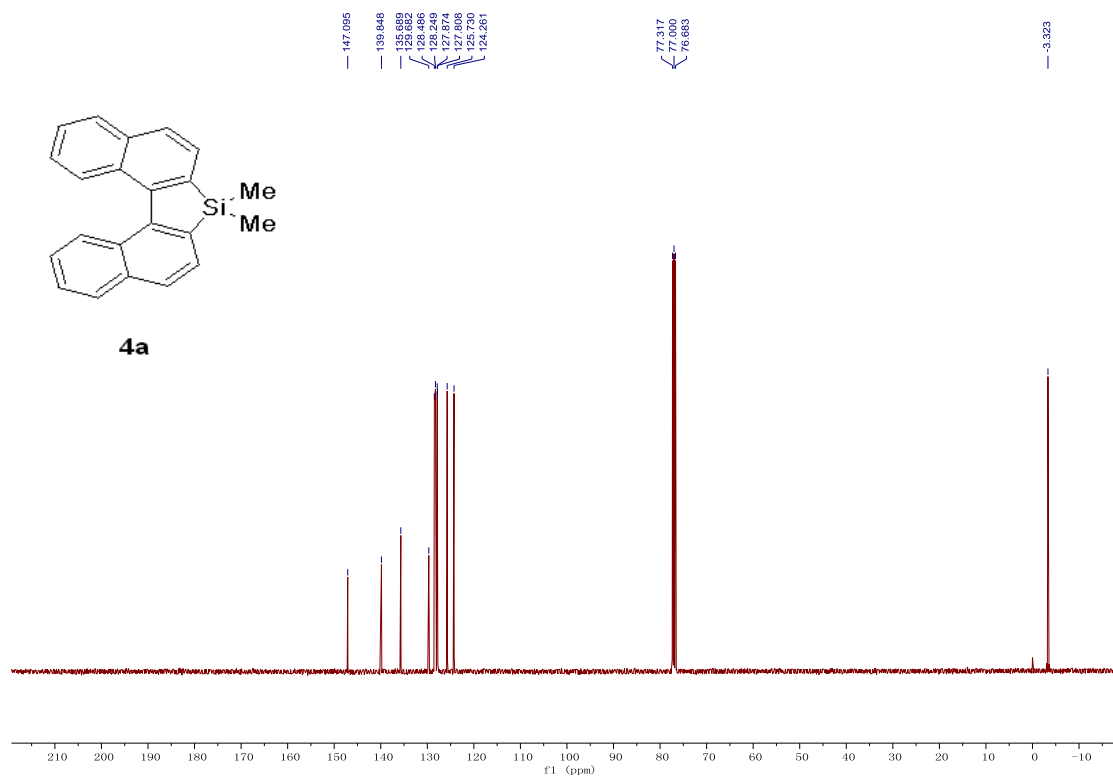

Supplementary Figure 33.  $^{13}\text{C}$  NMR spectroscopy of **4a**

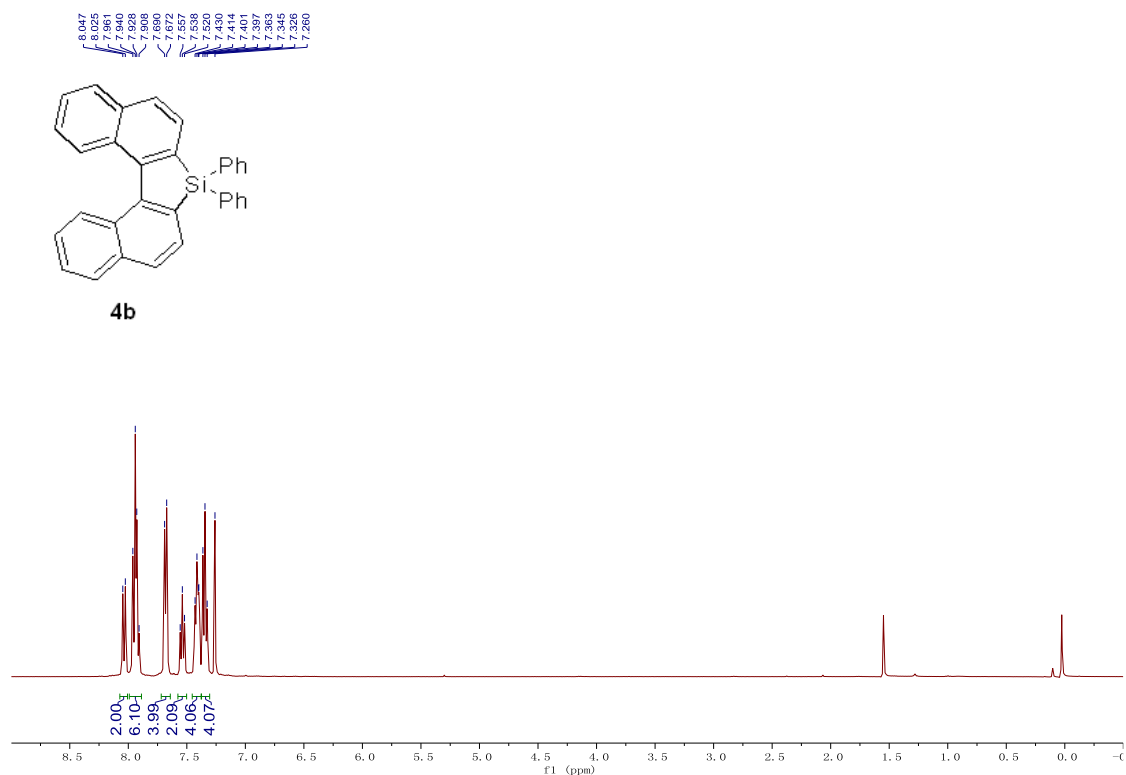

Supplementary Figure 34.  $^1\text{H}$  NMR spectroscopy of **4b**



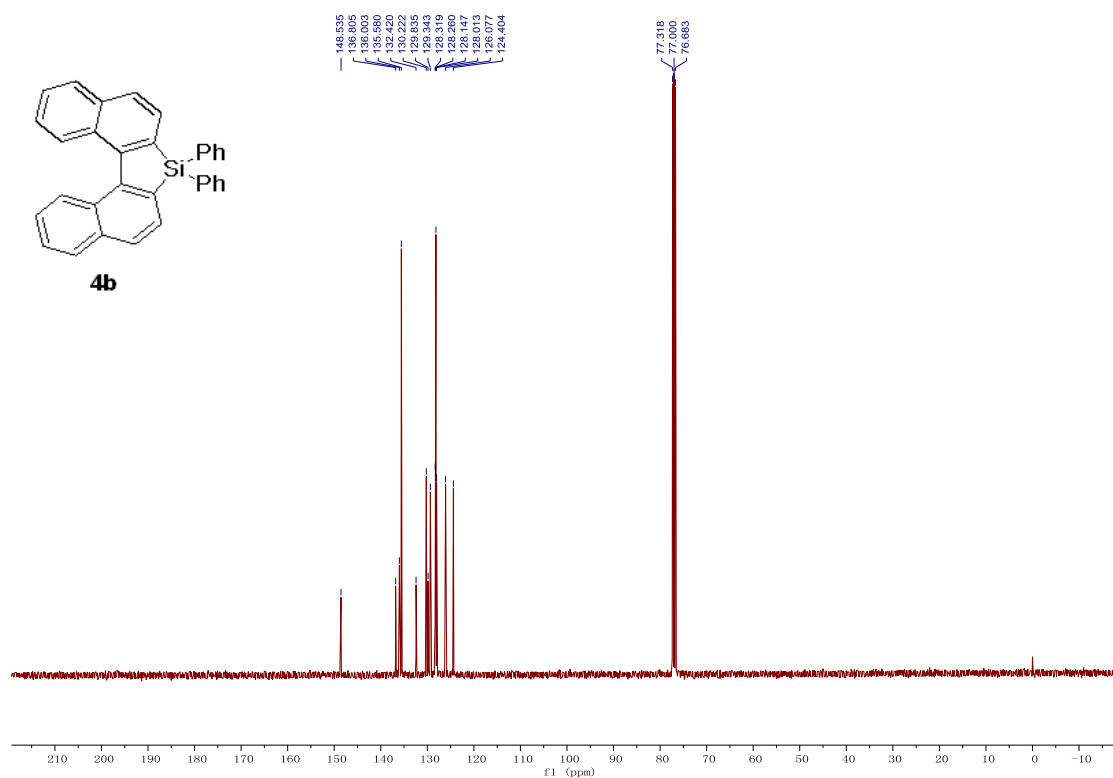

Supplementary Figure 35.  $^{13}\text{C}$  NMR spectroscopy of **4b**

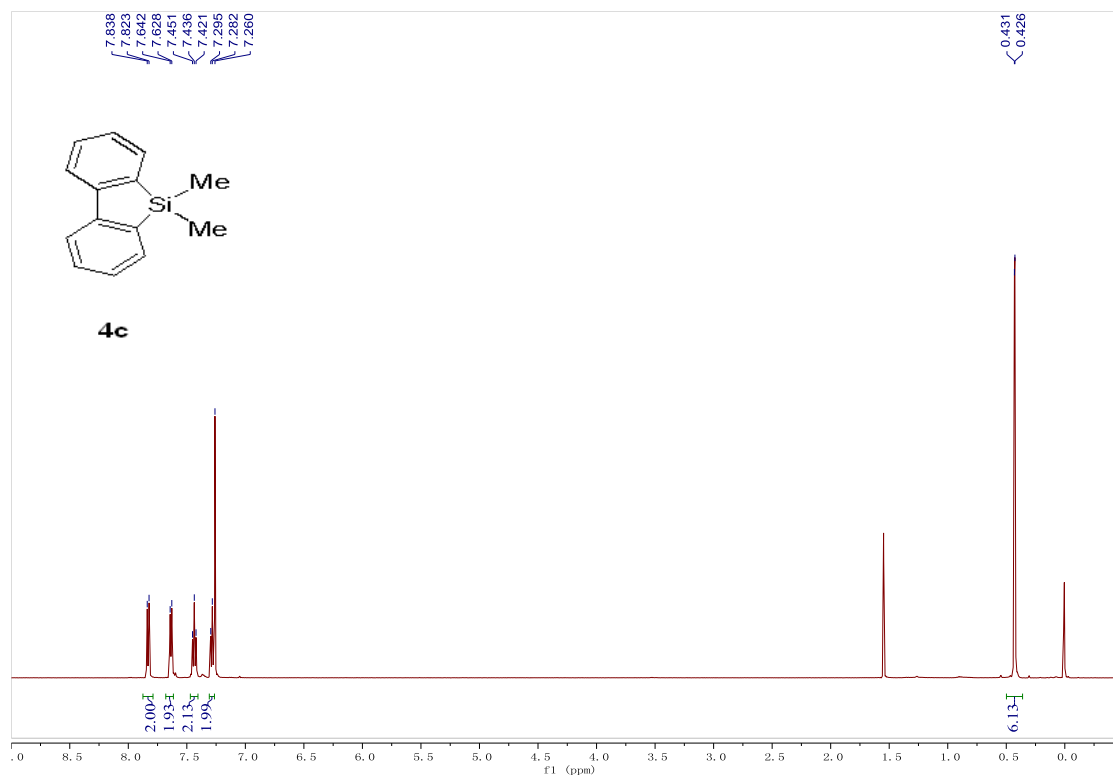

Supplementary Figure 36.  $^1\text{H}$  NMR spectroscopy of **4c**

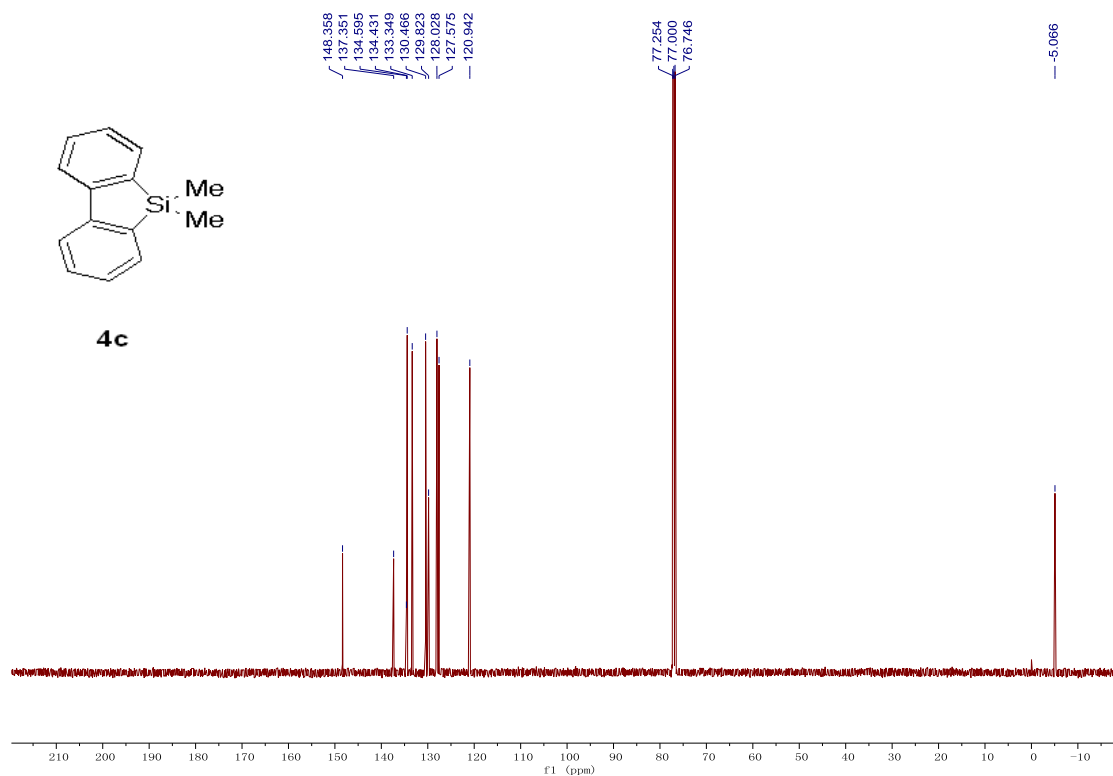

Supplementary Figure 37.  $^{13}\text{C}$  NMR spectroscopy of **4c**

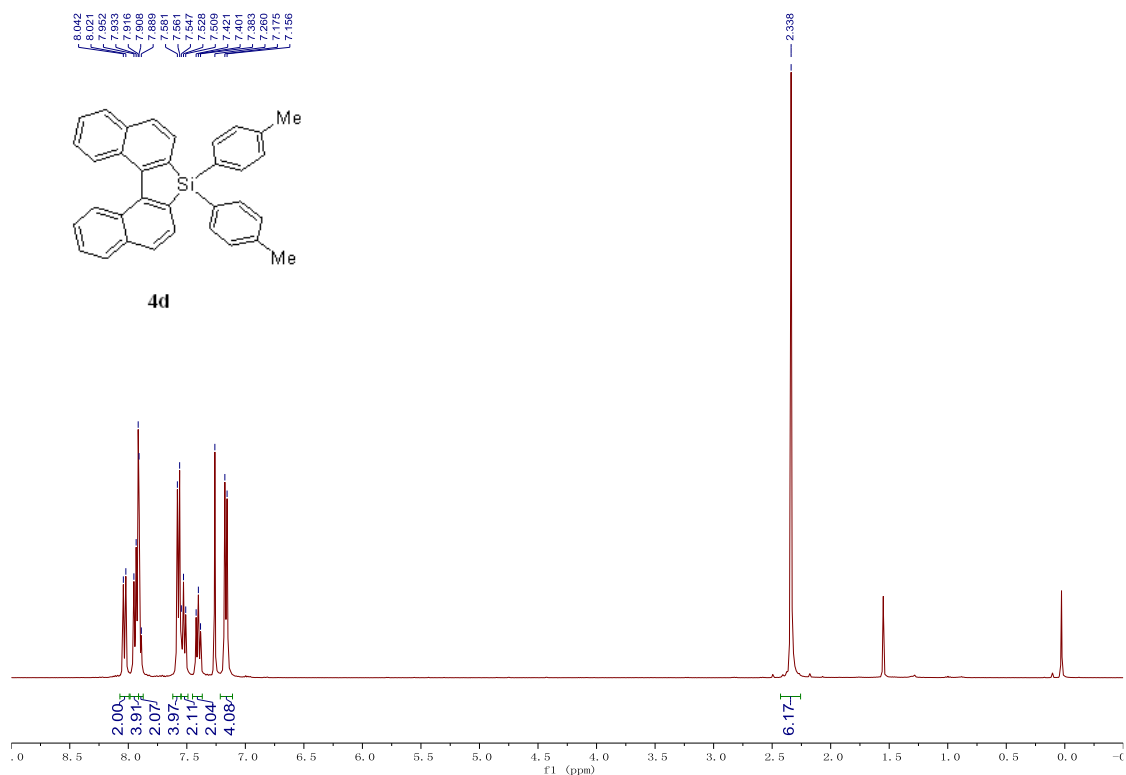

Supplementary Figure 38.  $^1\text{H}$  NMR spectroscopy of **4d**

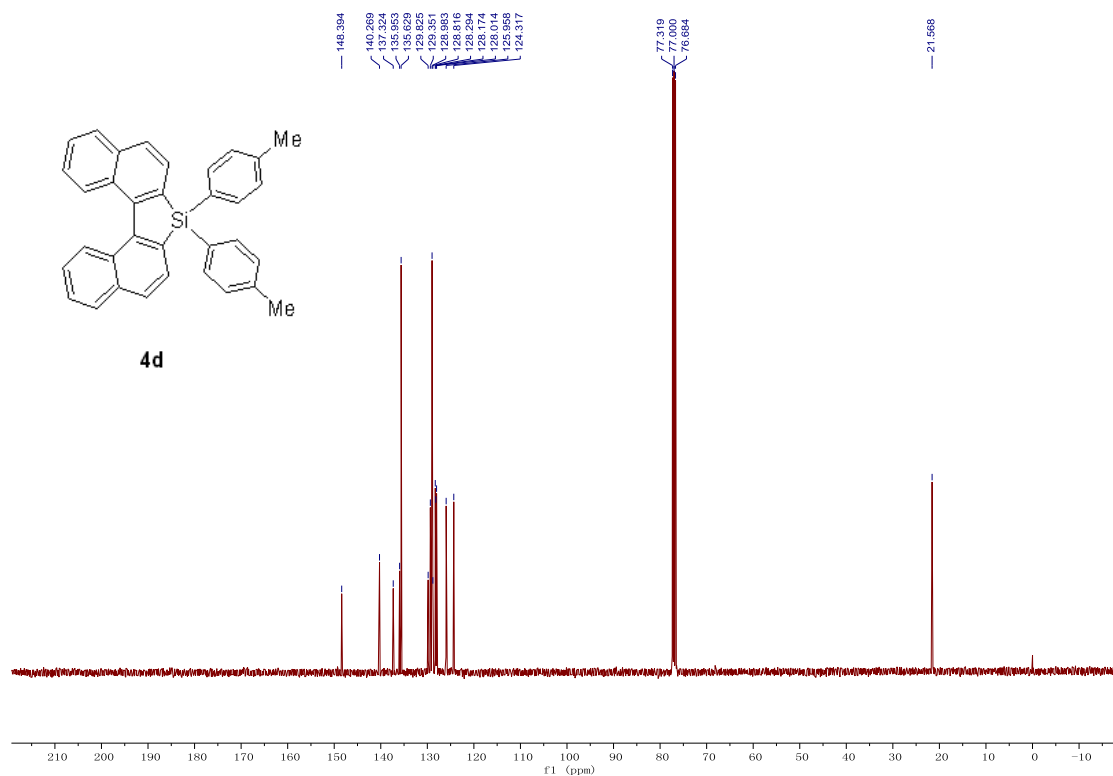

Supplementary Figure 39.  $^{13}\text{C}$  NMR spectroscopy of **4d**

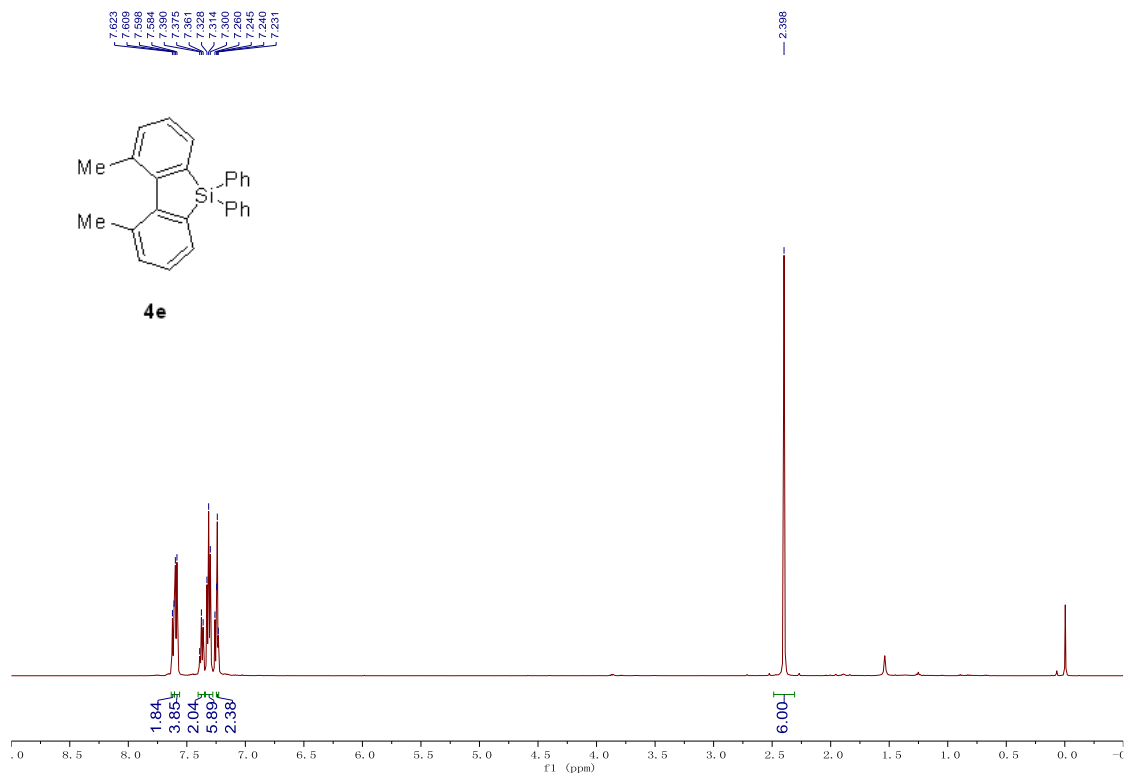

Supplementary Figure 40.  $^1\text{H}$  NMR spectroscopy of **4e**

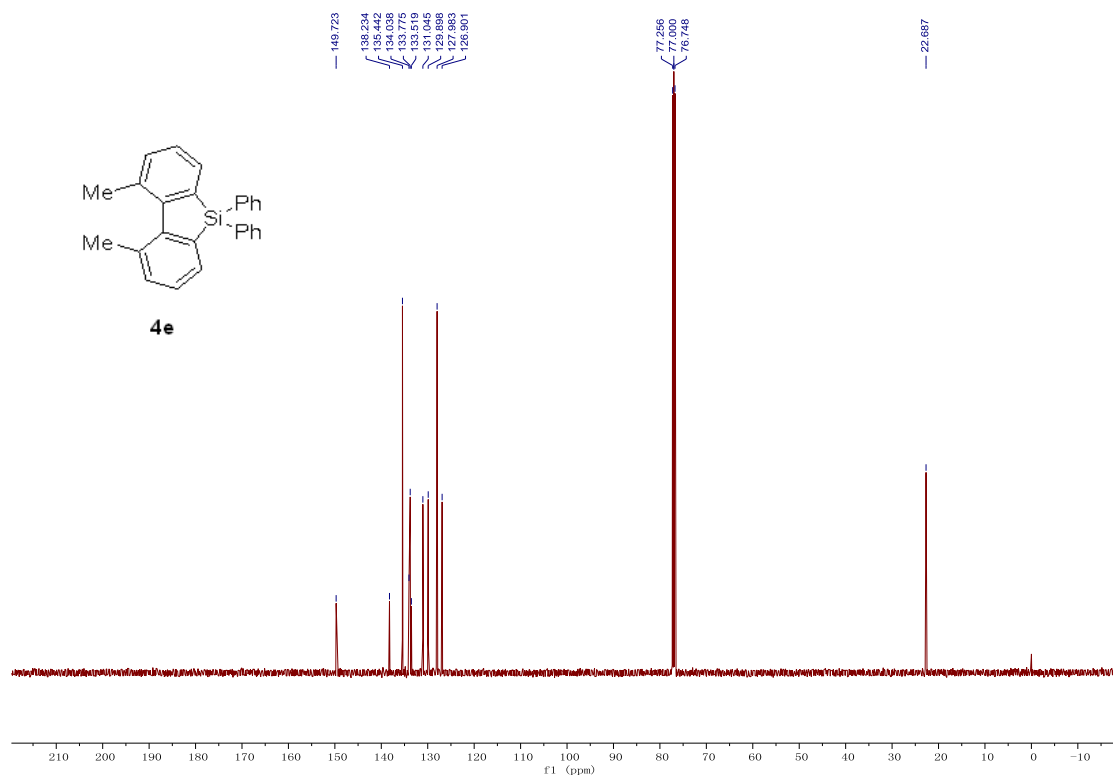

Supplementary Figure 41.  $^{13}\text{C}$  NMR spectroscopy of **4e**

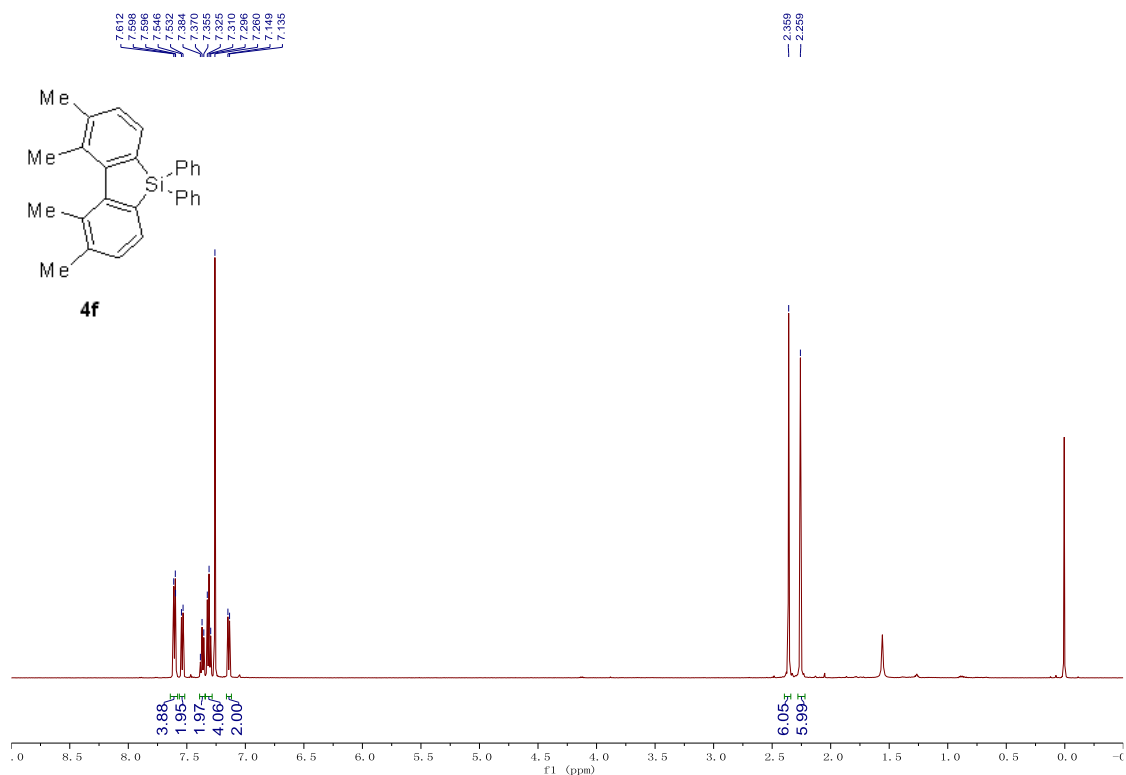

Supplementary Figure 42.  $^1\text{H}$  NMR spectroscopy of **4f**

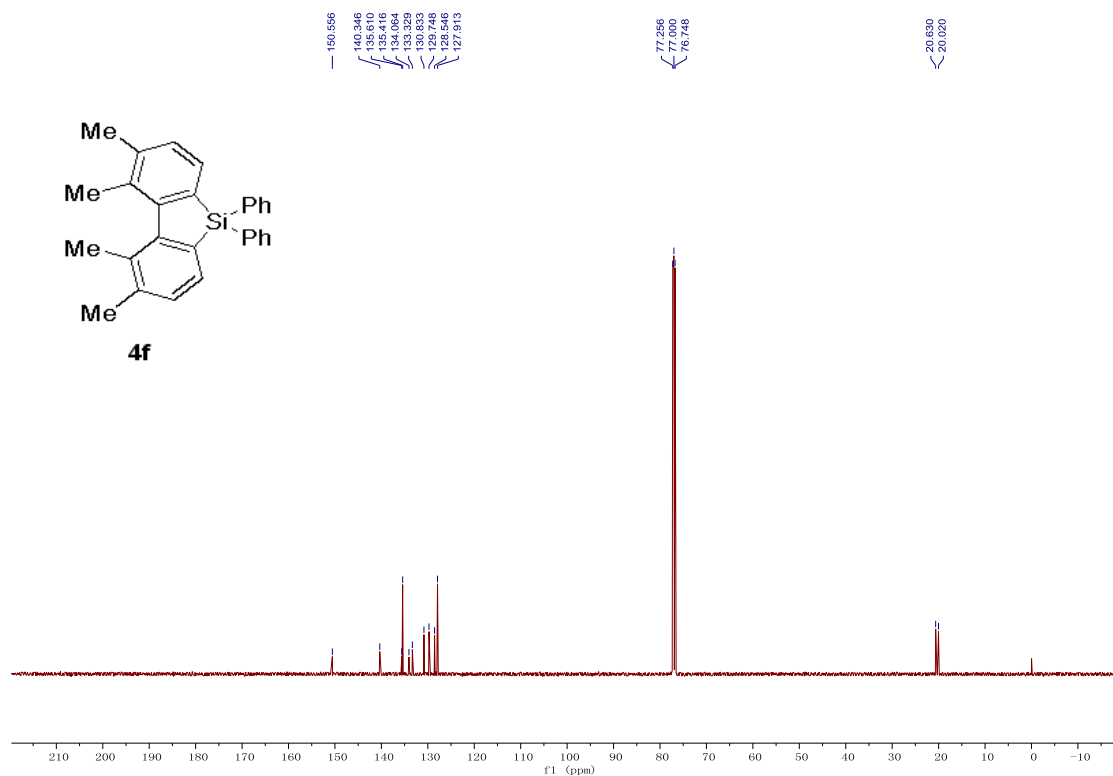

Supplementary Figure 43. <sup>13</sup>C NMR spectroscopy of **4f**

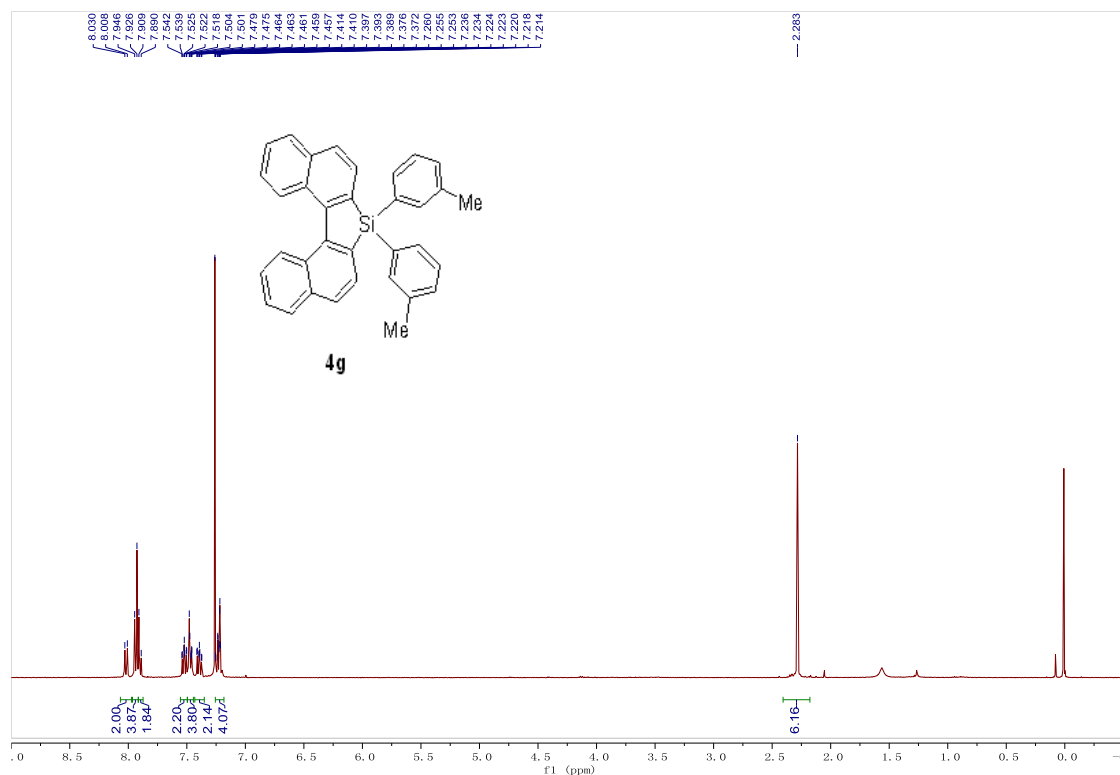

Supplementary Figure 44. <sup>1</sup>H NMR spectroscopy of **4g**

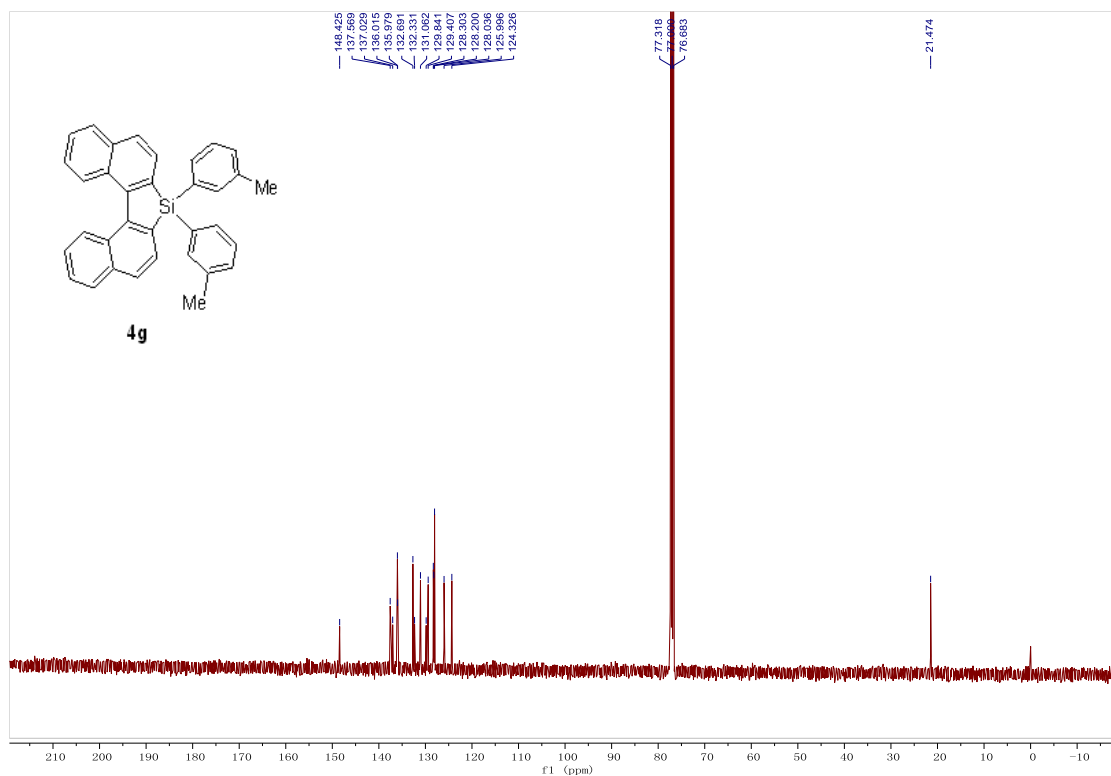

Supplementary Figure 45.  $^{13}\text{C}$  NMR spectroscopy of **4g**

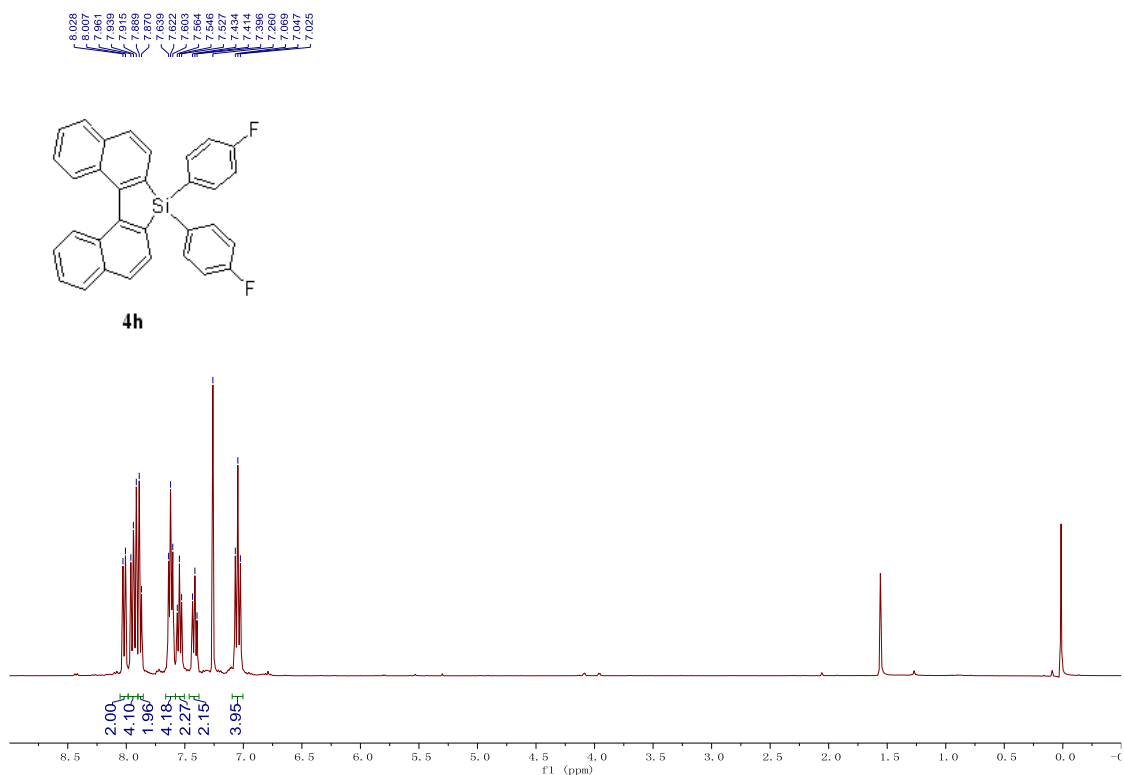

Supplementary Figure 46.  $^1\text{H}$  NMR spectroscopy of **4h**

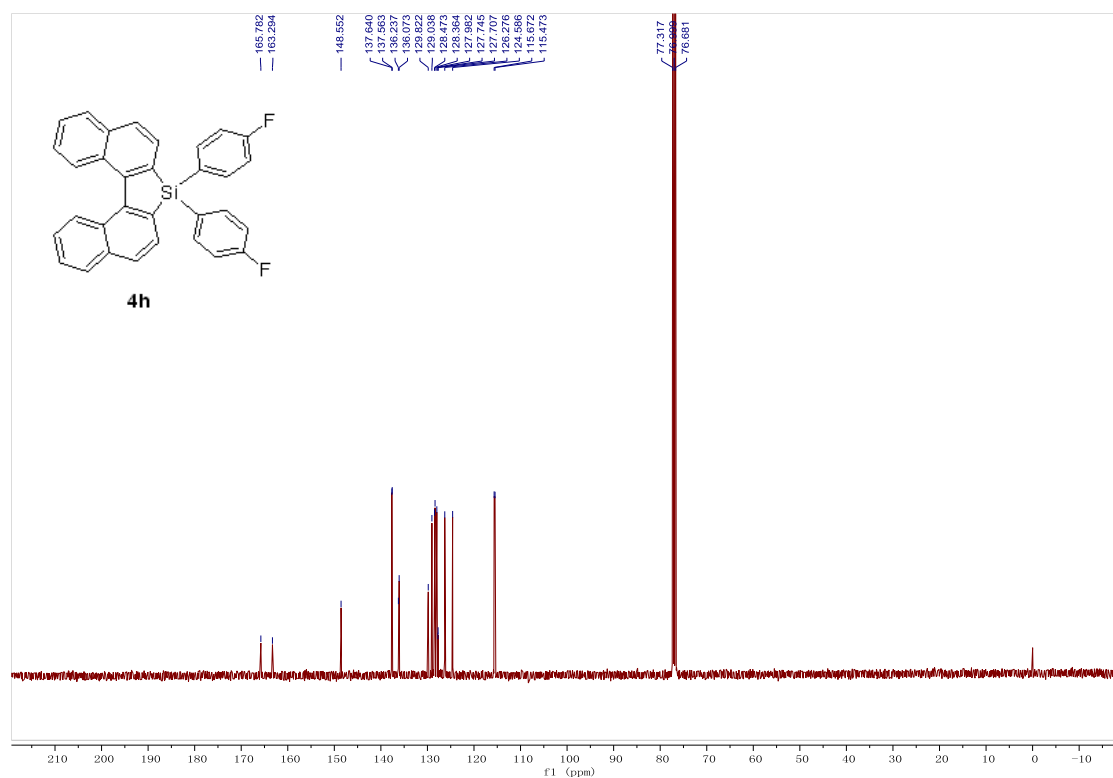

Supplementary Figure 47. <sup>13</sup>C NMR spectroscopy of **4h**

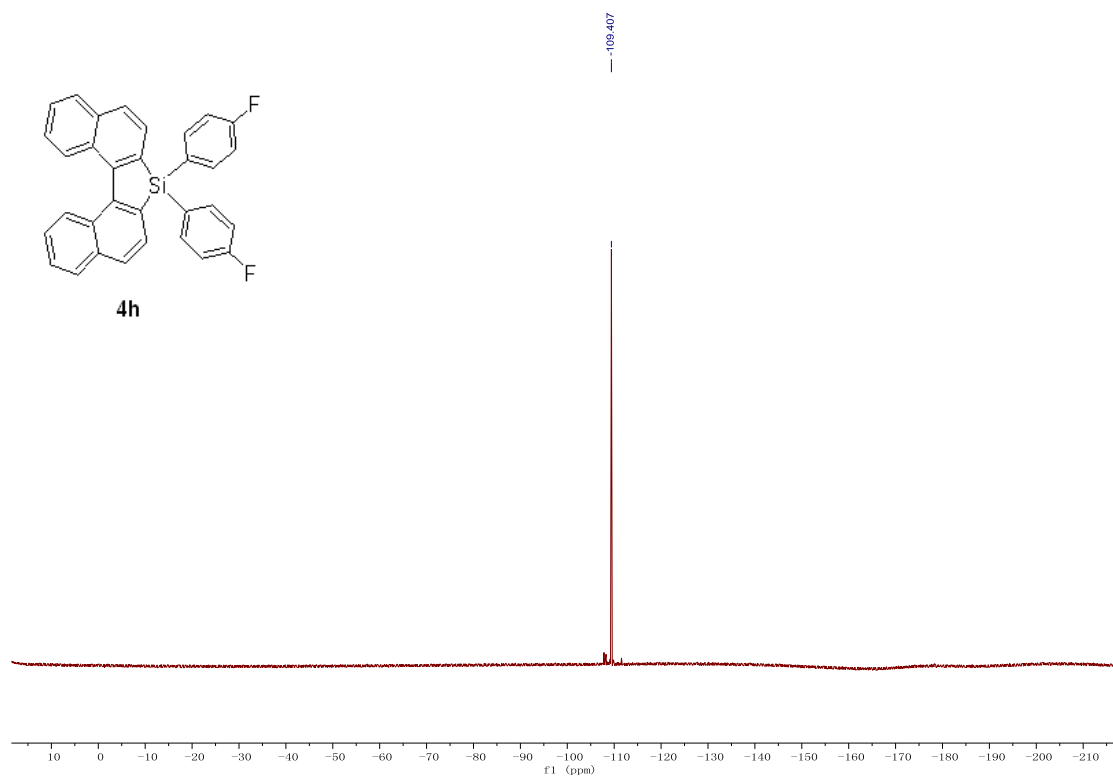

Supplementary Figure 48. <sup>19</sup>F NMR spectroscopy of **4h**

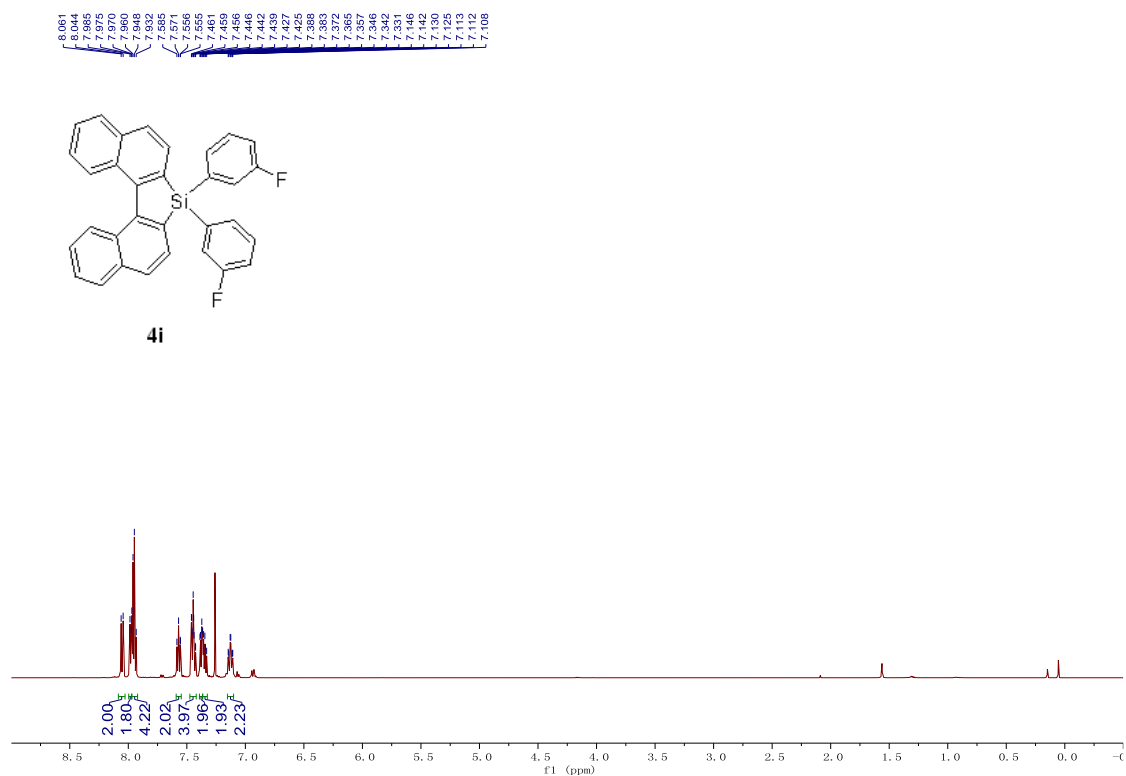

Supplementary Figure 49.  $^1\text{H}$  NMR spectroscopy of **4i**

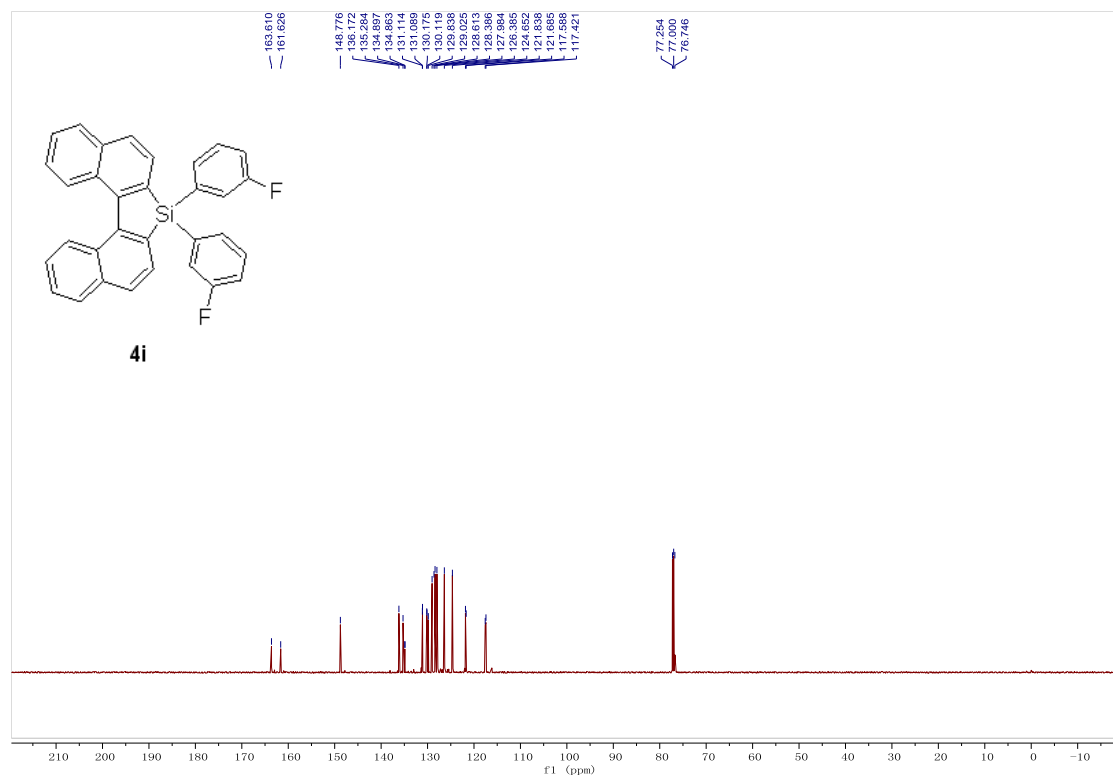

Supplementary Figure 50.  $^{13}\text{C}$  NMR spectroscopy of **4i**



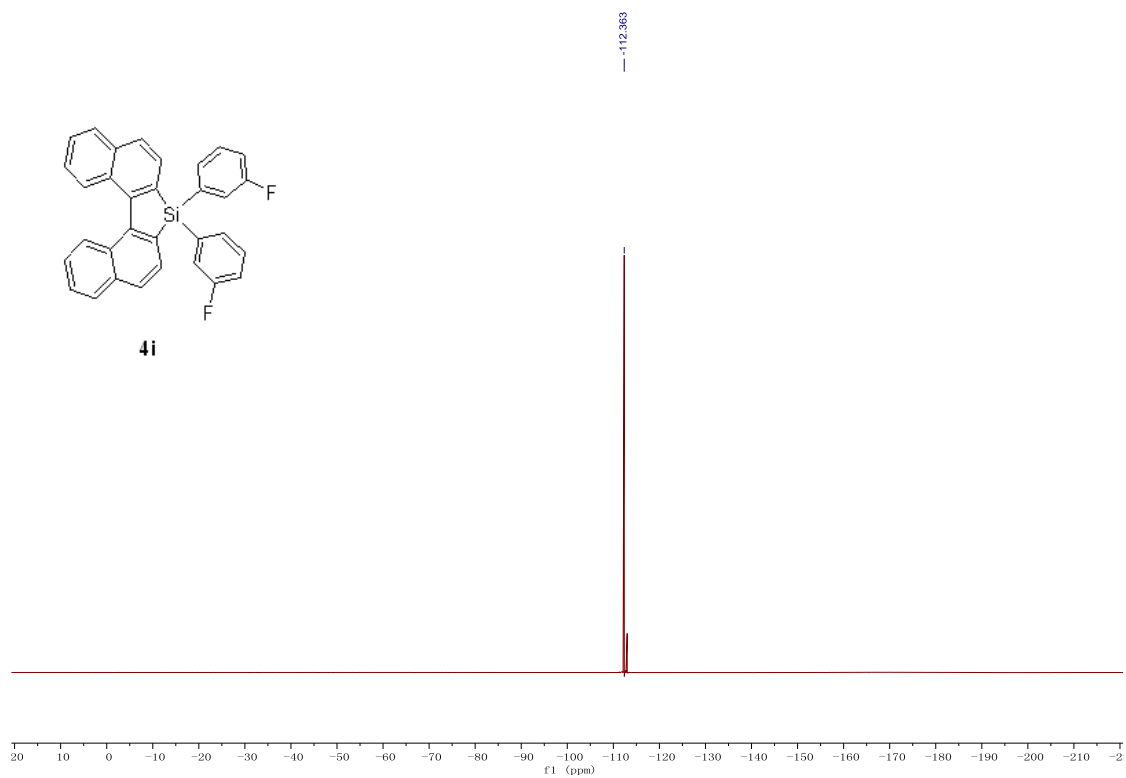

Supplementary Figure 51.  $^{19}\text{F}$  NMR spectroscopy of **4i**

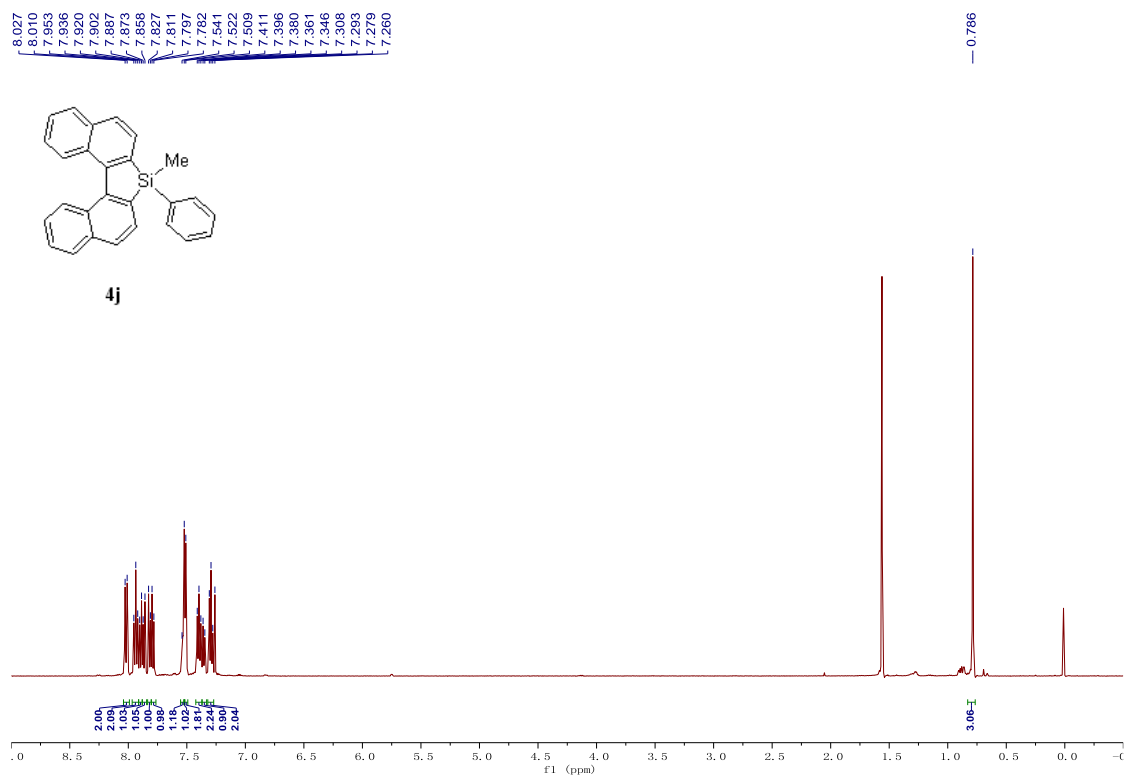

Supplementary Figure 52.  $^1\text{H}$  NMR spectroscopy of **4j**

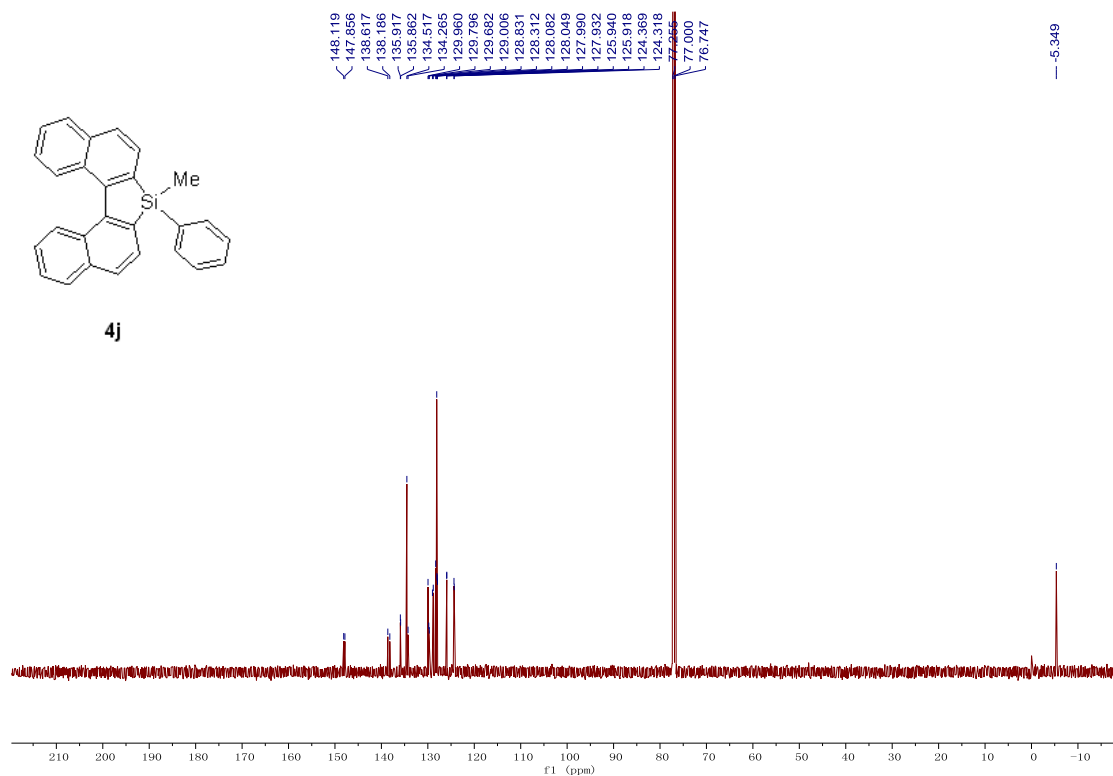

Supplementary Figure 53.  $^{13}\text{C}$  NMR spectroscopy of **4j**

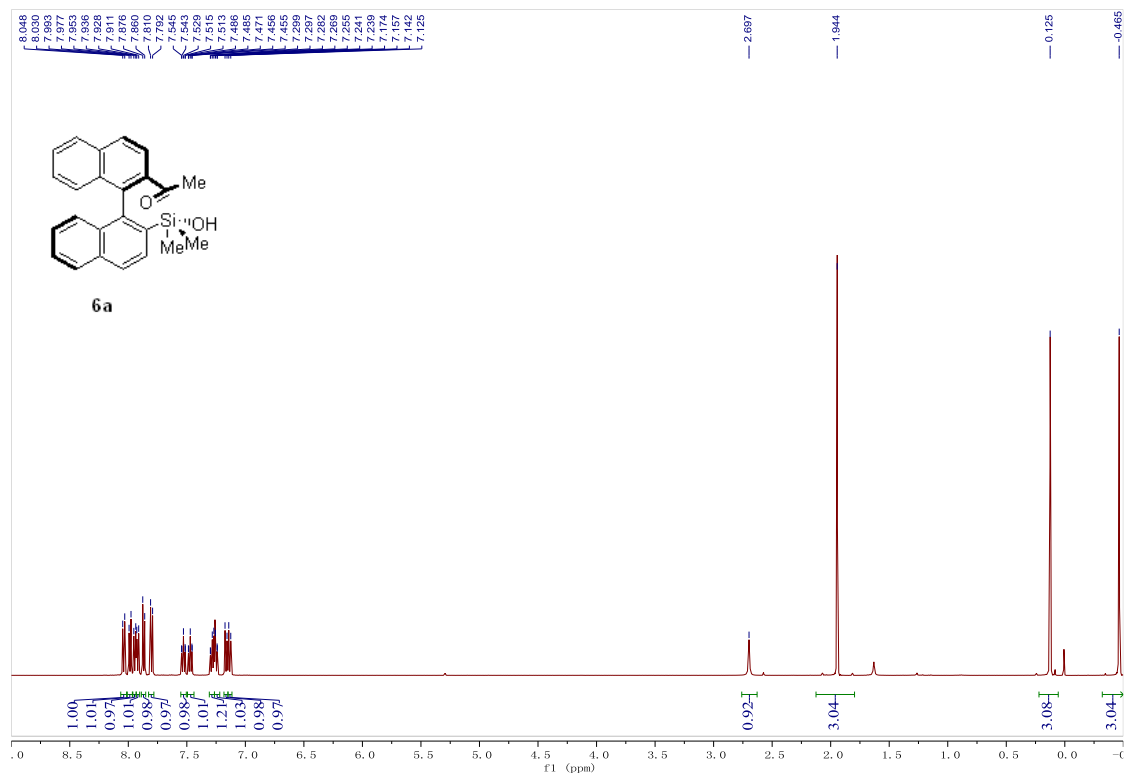

Supplementary Figure 54.  $^1\text{H}$  NMR spectroscopy of **6a**

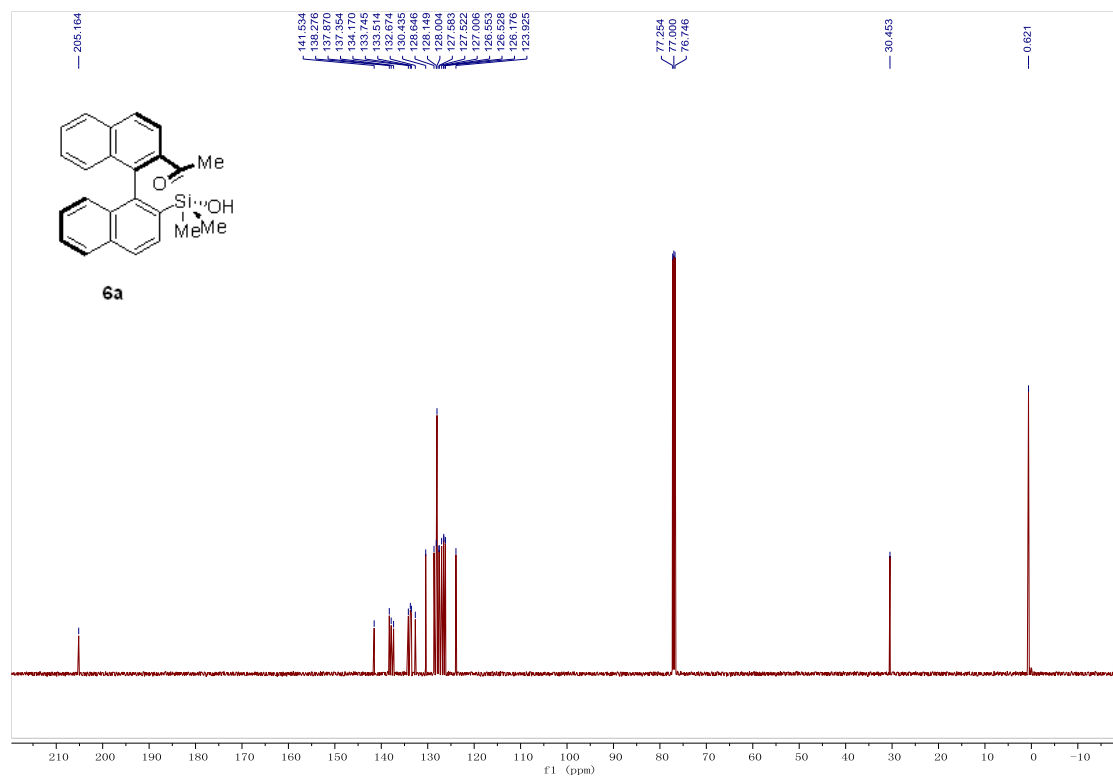

Supplementary Figure 55. <sup>13</sup>C NMR spectroscopy of **6a**

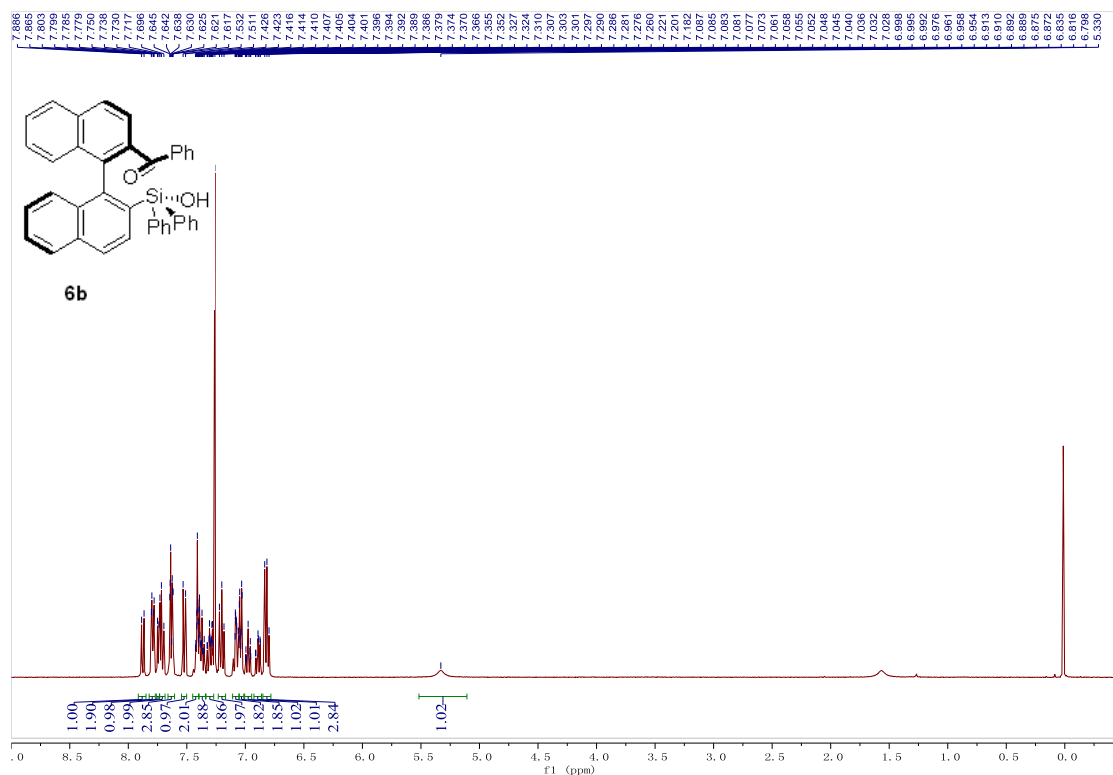

Supplementary Figure 56. <sup>1</sup>H NMR spectroscopy of **6b**

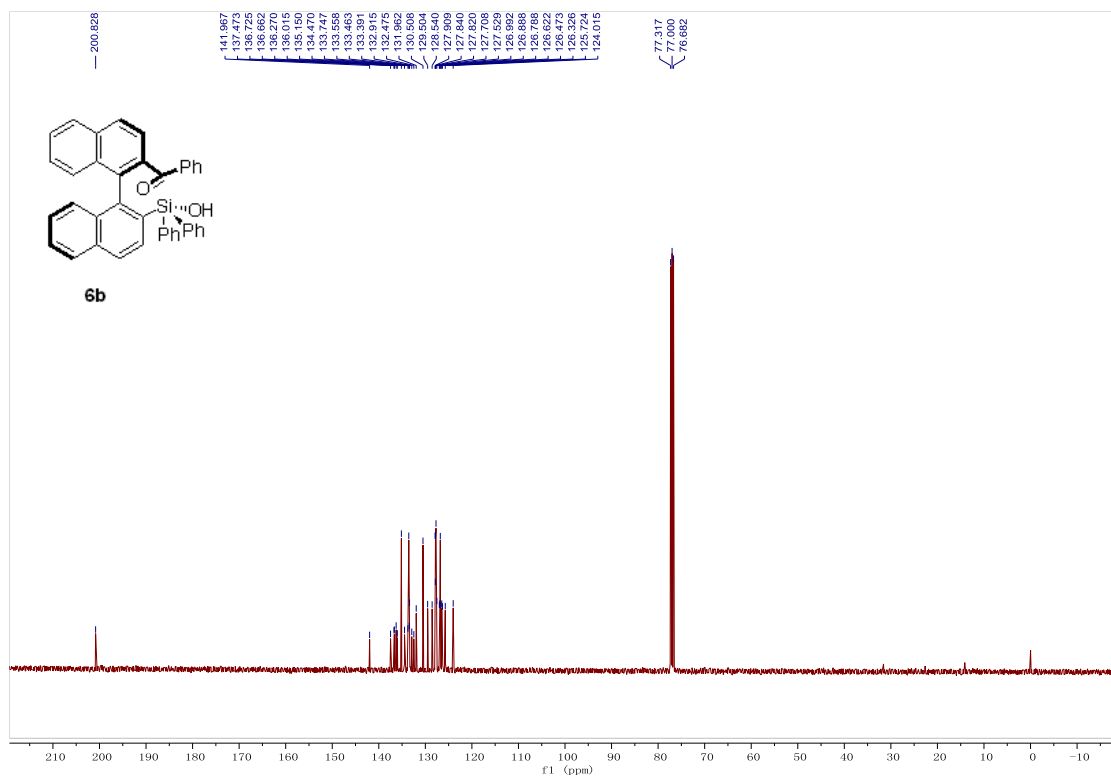

Supplementary Figure 57. <sup>13</sup>C NMR spectroscopy of **6b**

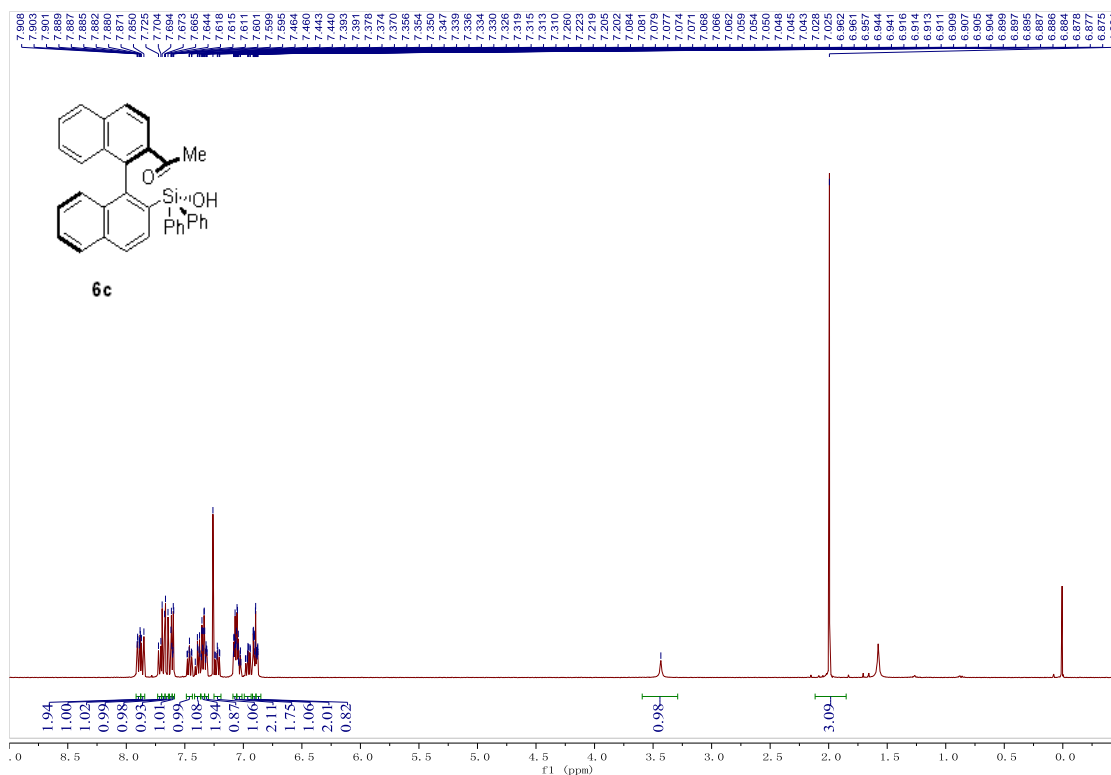

Supplementary Figure 58. <sup>1</sup>H NMR spectroscopy of **6c**

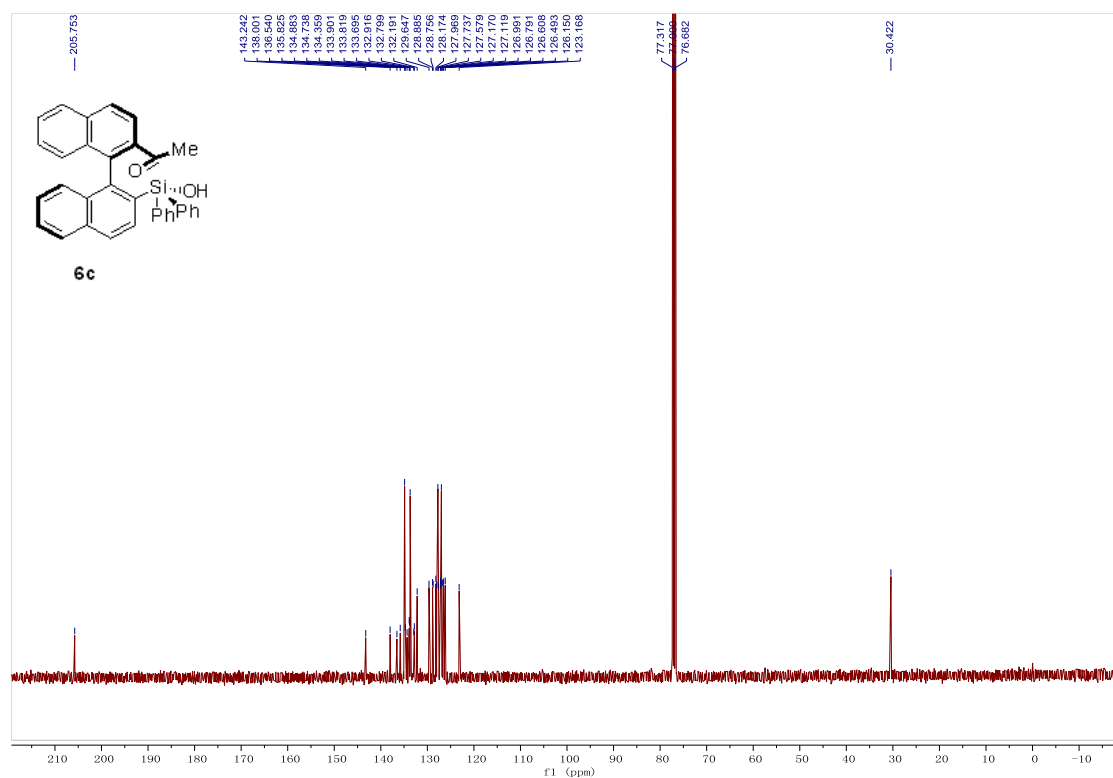

Supplementary Figure 59. <sup>13</sup>C NMR spectroscopy of **6c**

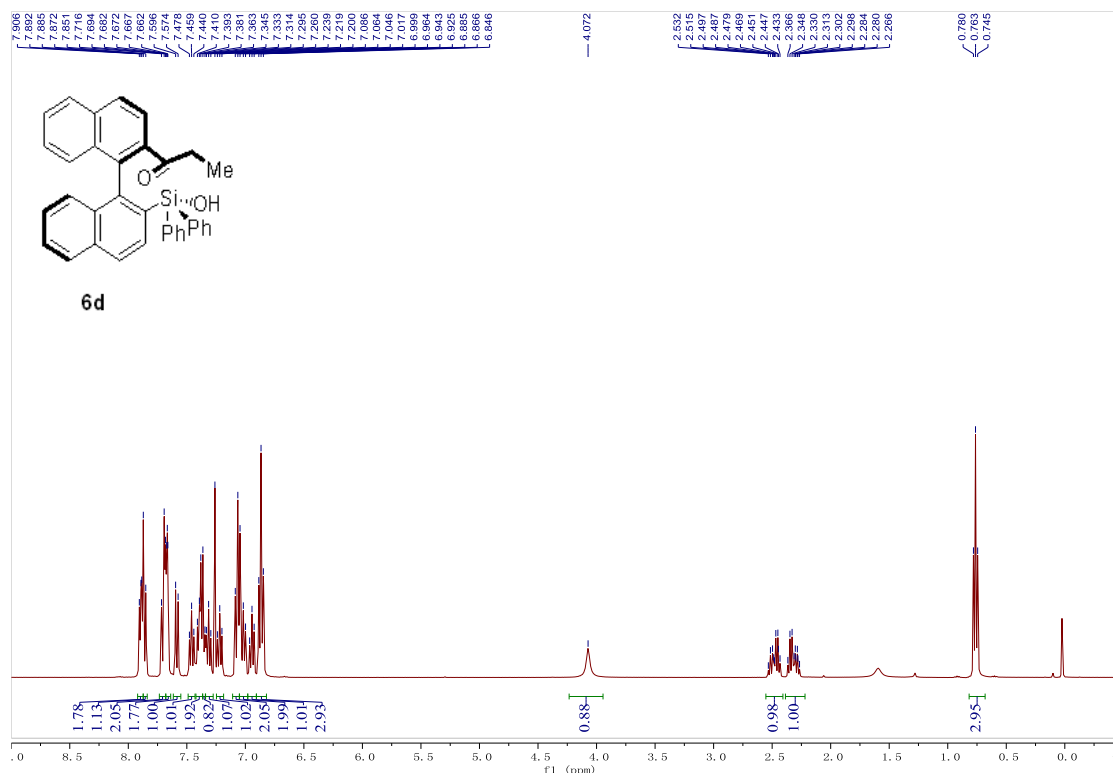

Supplementary Figure 60. <sup>1</sup>H NMR spectroscopy of **6d**

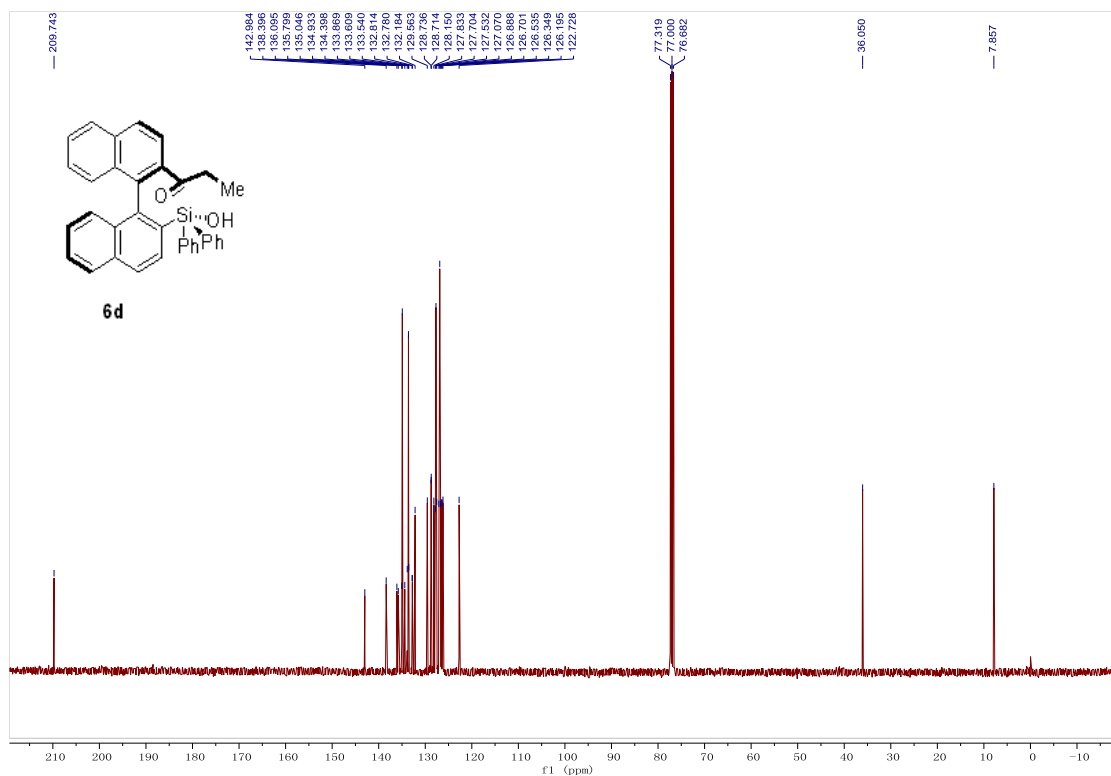

Supplementary Figure 61.  $^{13}\text{C}$  NMR spectroscopy of **6d**

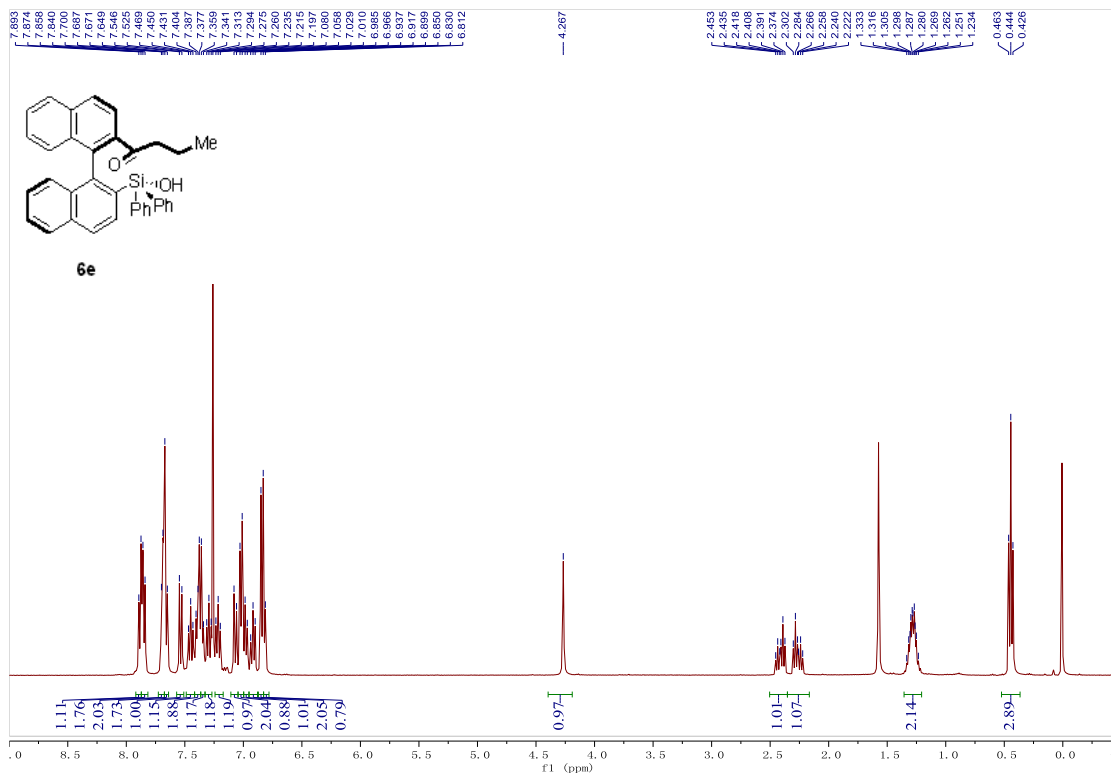

Supplementary Figure 62.  $^1\text{H}$  NMR spectroscopy of **6e**

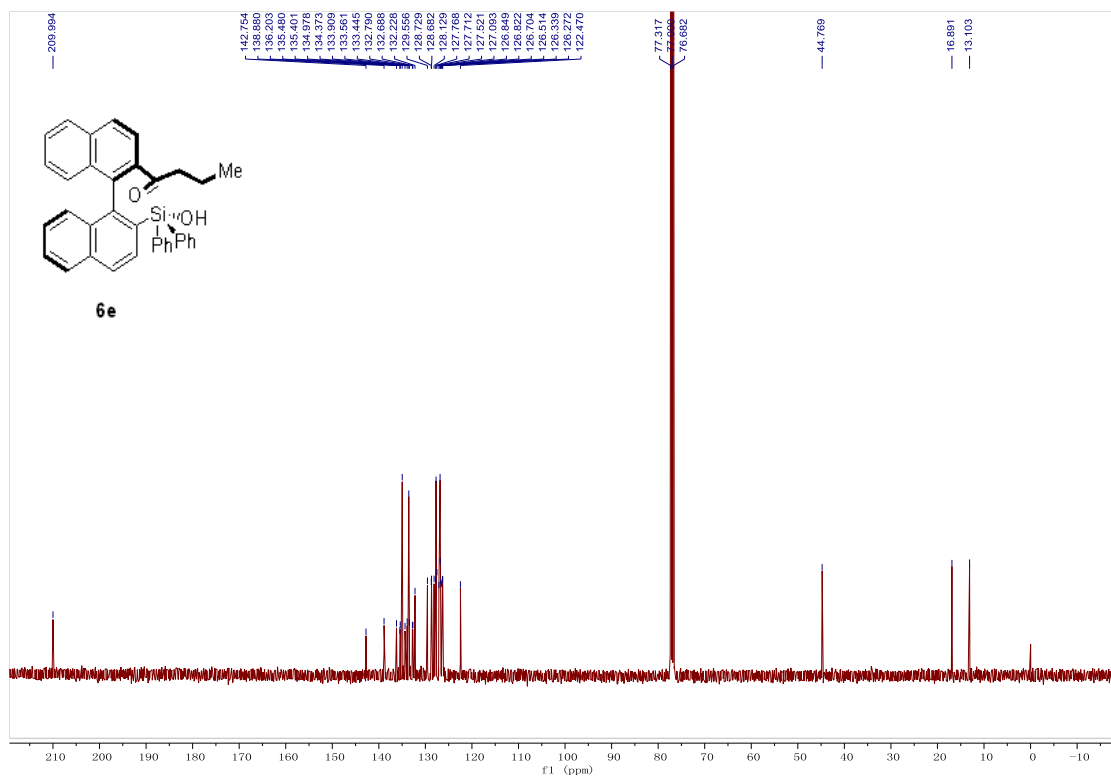

Supplementary Figure 63.  $^{13}\text{C}$  NMR spectroscopy of **6e**

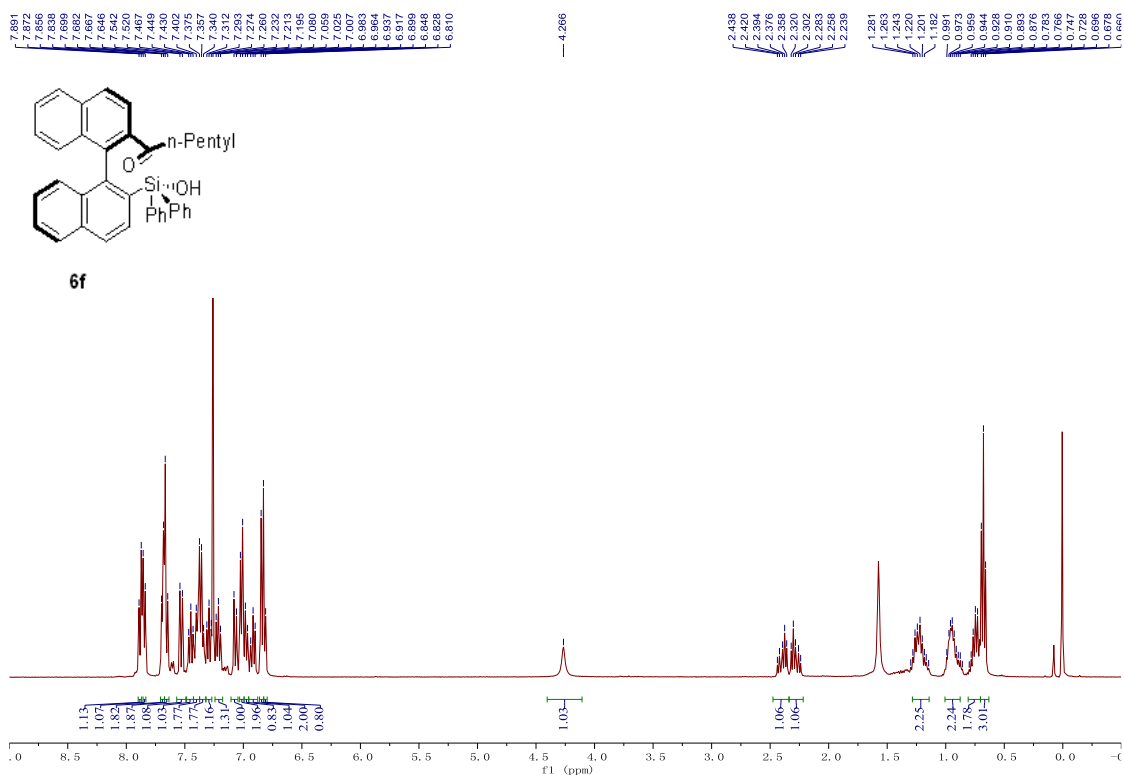

Supplementary Figure 64.  $^1\text{H}$  NMR spectroscopy of **6f**

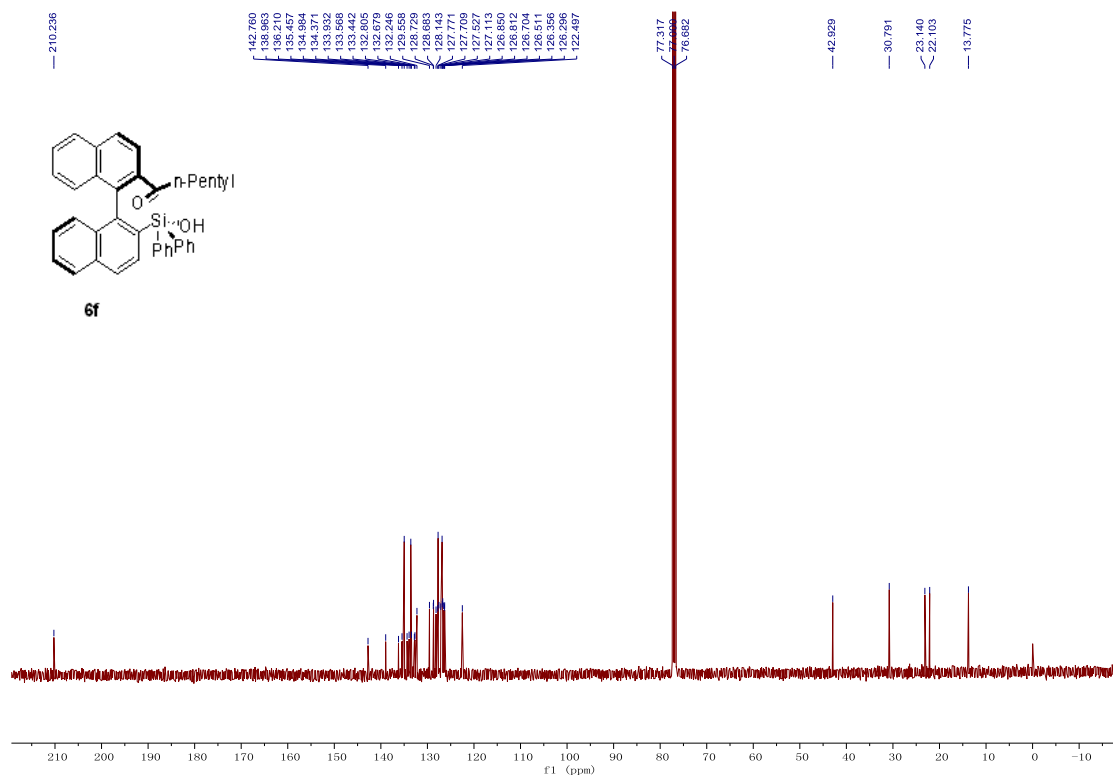

Supplementary Figure 65.  $^{13}\text{C}$  NMR spectroscopy of **6f**

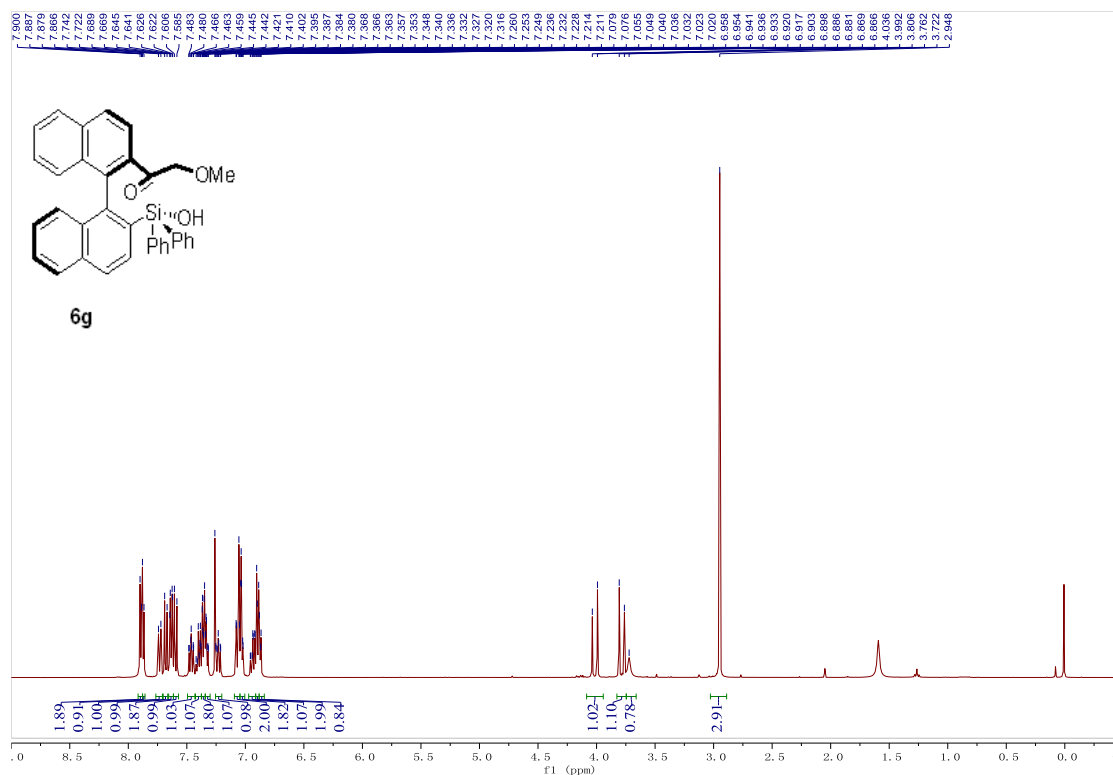

Supplementary Figure 66.  $^1\text{H}$  NMR spectroscopy of **6g**



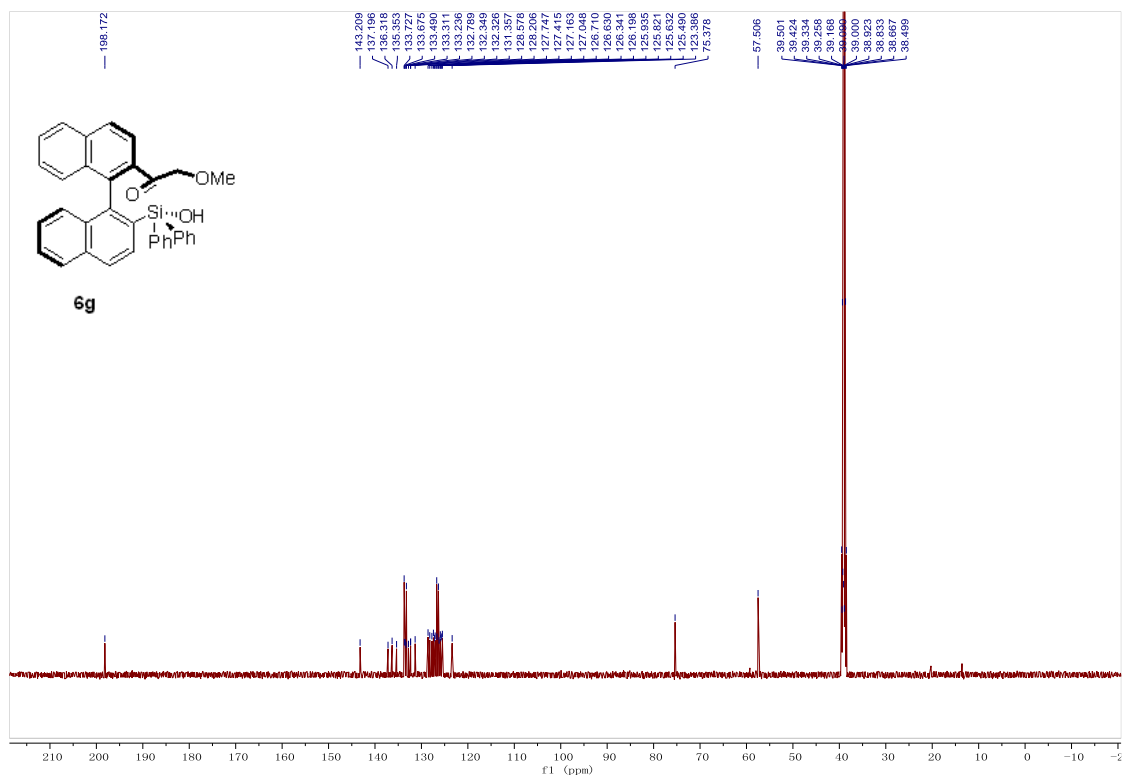

Supplementary Figure 67.  $^{13}\text{C}$  NMR spectroscopy of **6g**

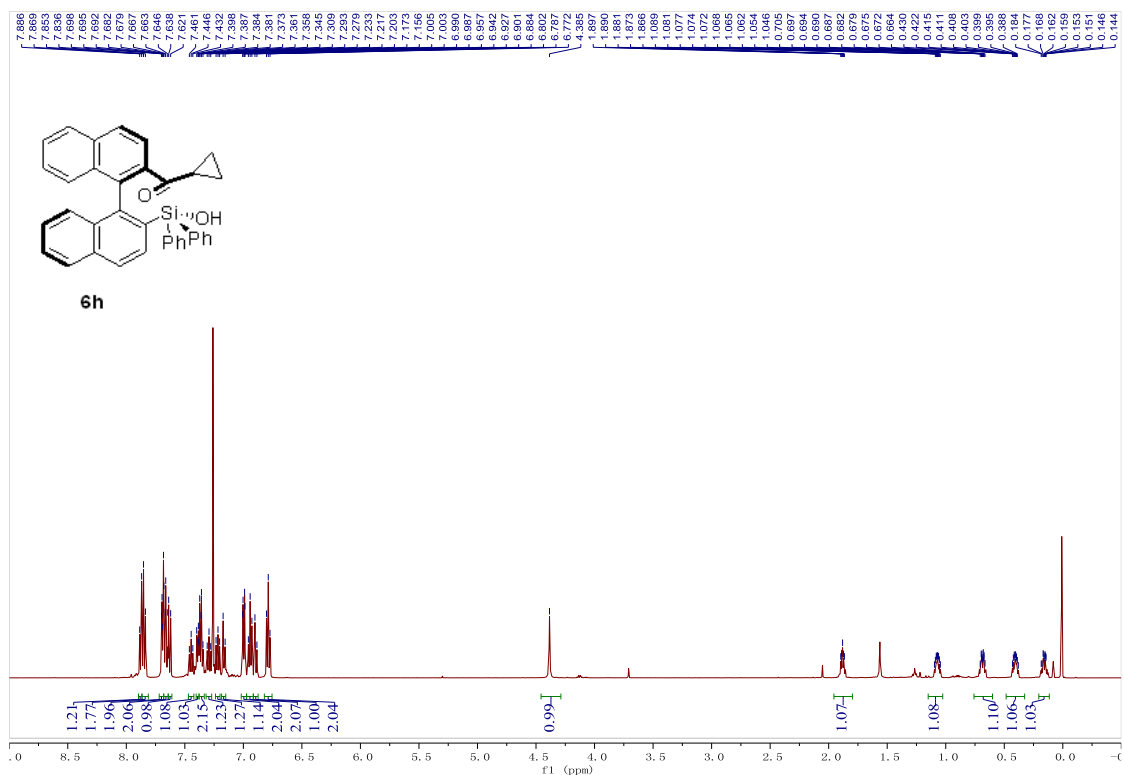

Supplementary Figure 68.  $^1\text{H}$  NMR spectroscopy of **6h**

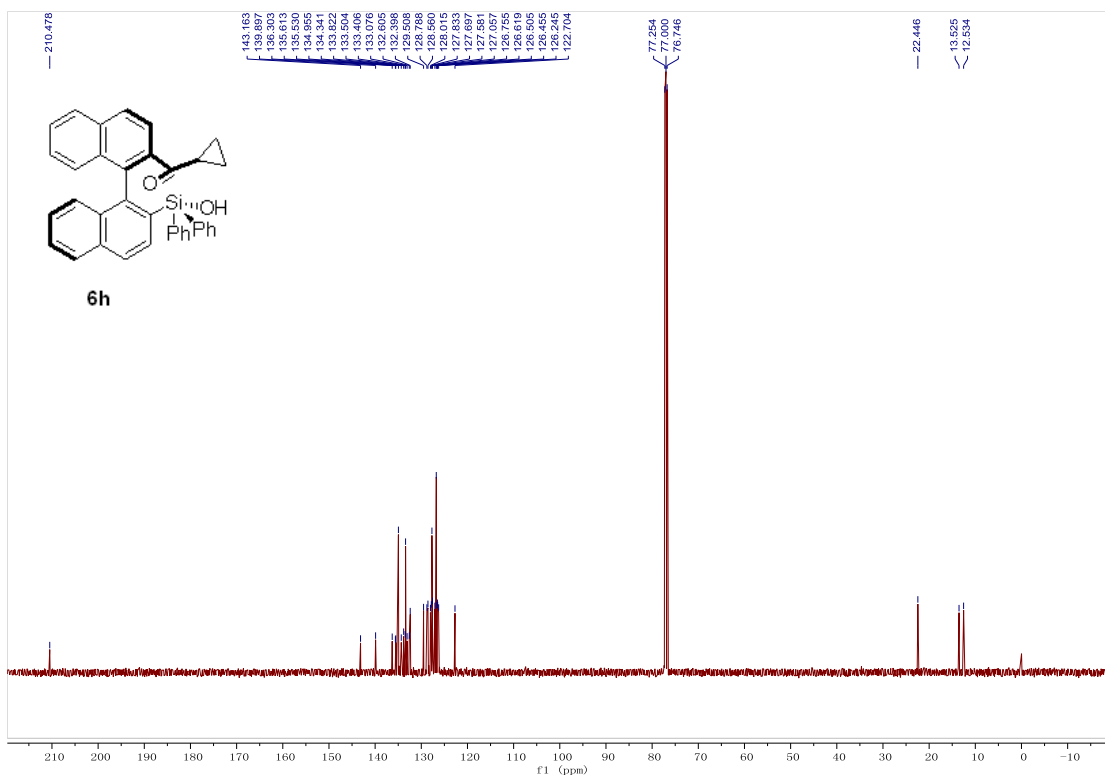

Supplementary Figure 69.  $^{13}\text{C}$  NMR spectroscopy of **6h**

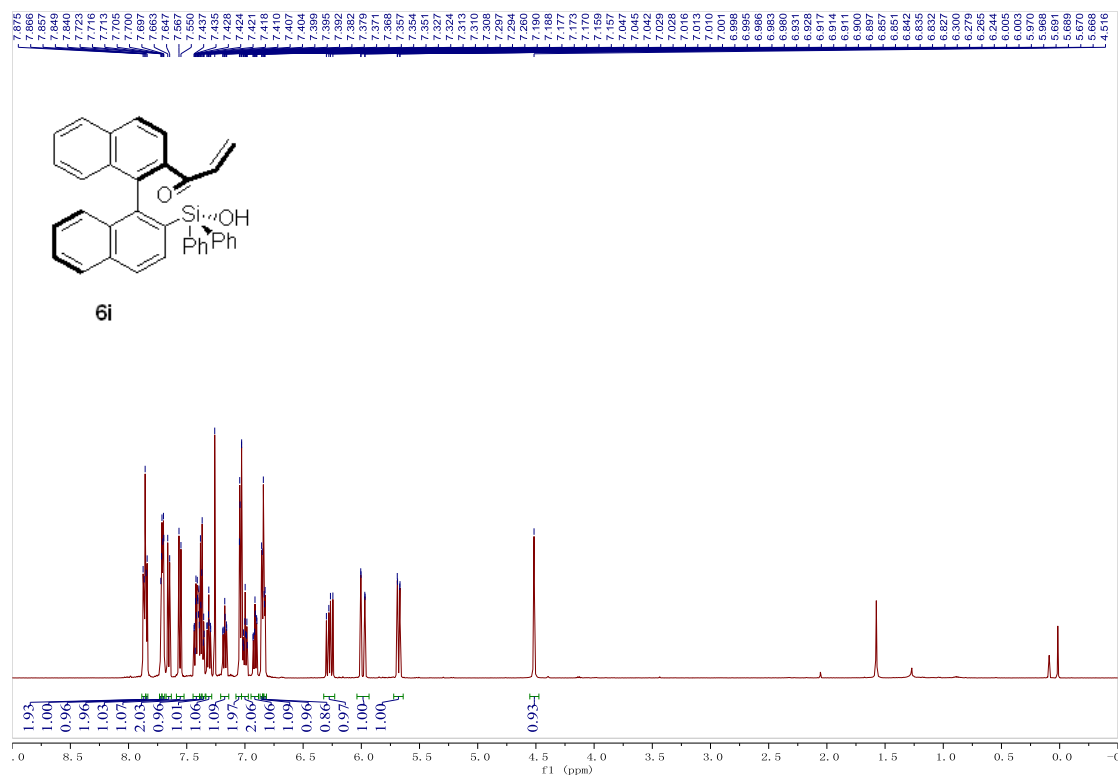

Supplementary Figure 70.  $^1\text{H}$  NMR spectroscopy of **6i**

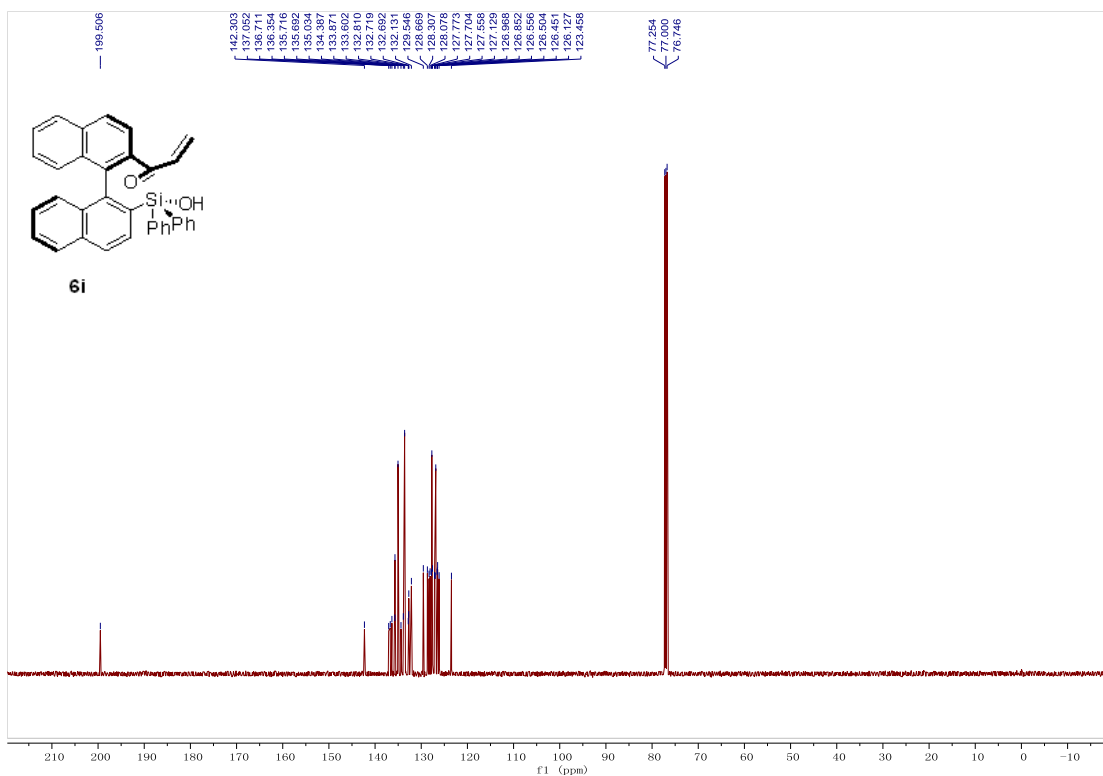

Supplementary Figure 71. <sup>13</sup>C NMR spectroscopy of **6i**

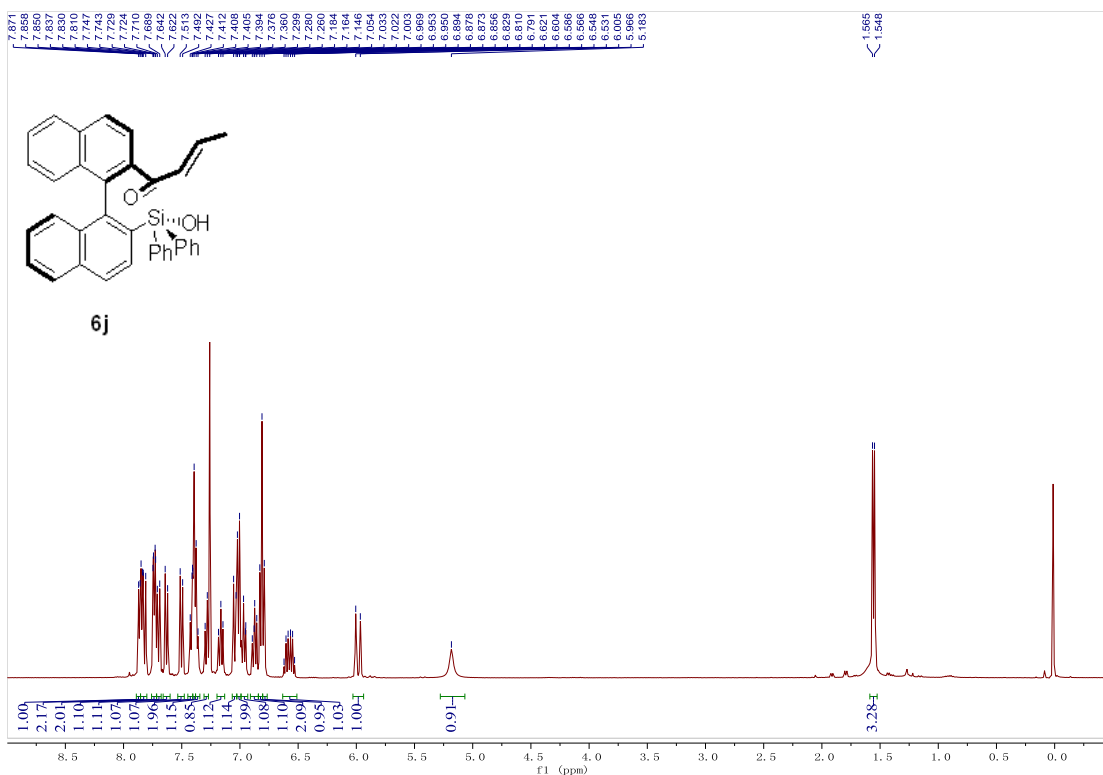

Supplementary Figure 72. <sup>1</sup>H NMR spectroscopy of **6j**

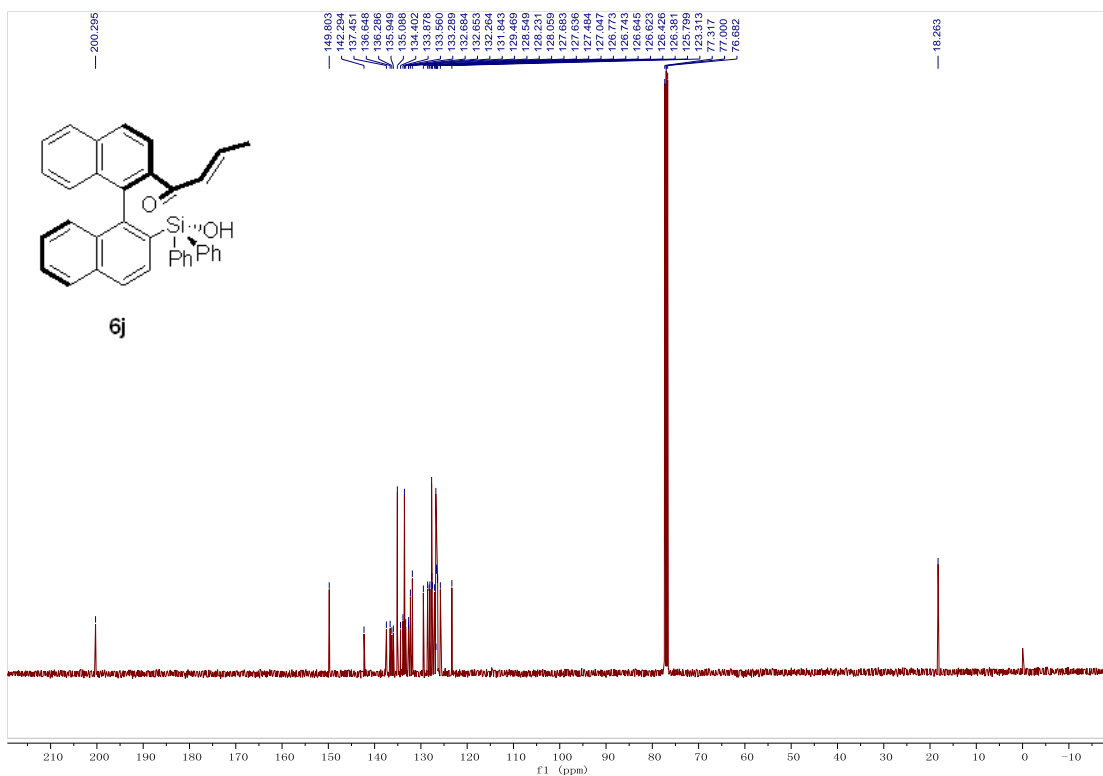

Supplementary Figure 73.  $^{13}\text{C}$  NMR spectroscopy of **6j**

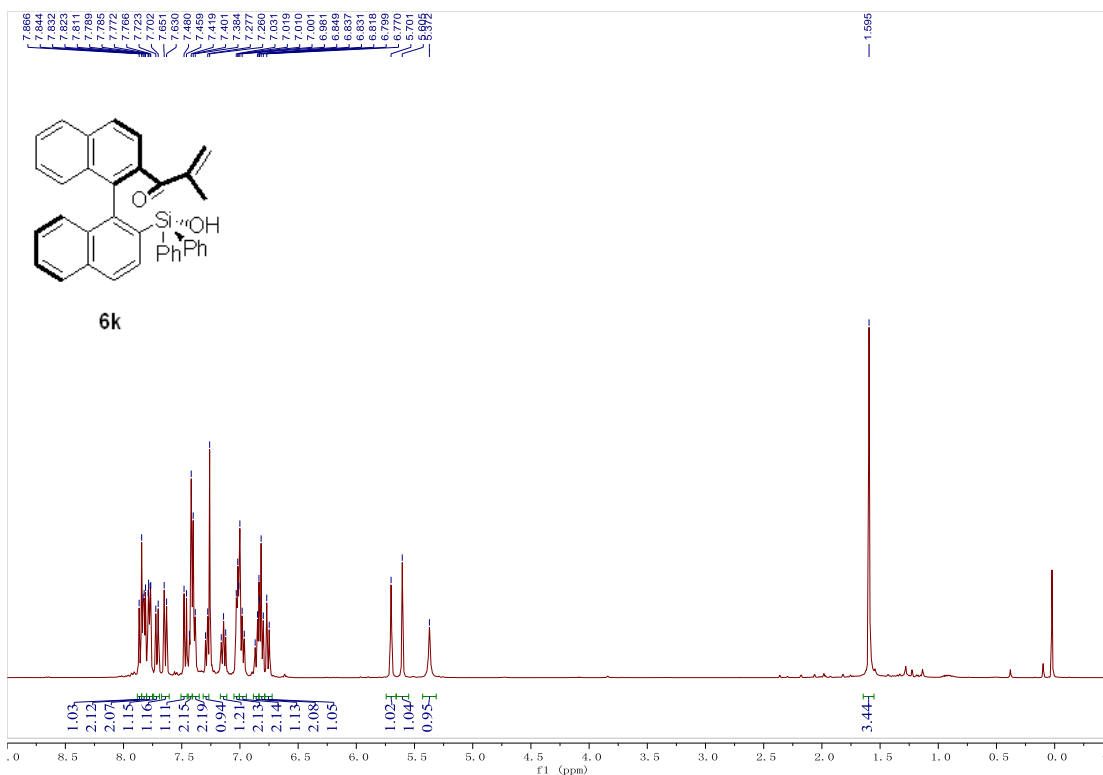

Supplementary Figure 74.  $^1\text{H}$  NMR spectroscopy of **6k**

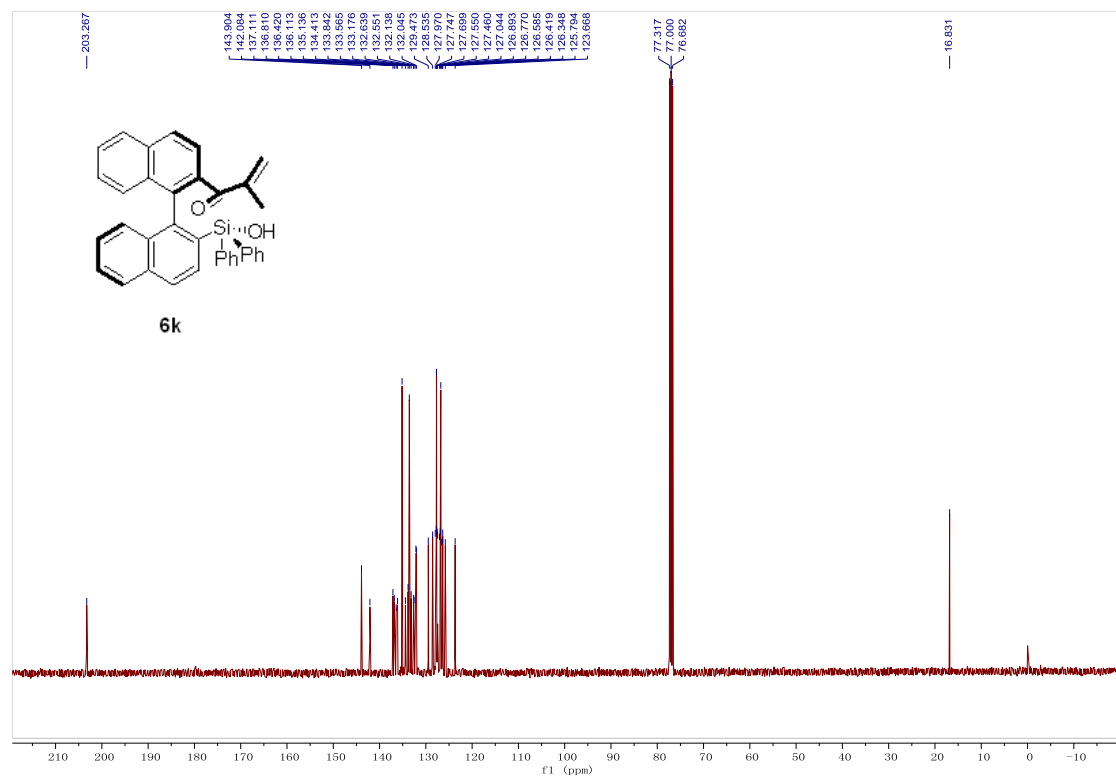

Supplementary Figure 75.  $^{13}\text{C}$  NMR spectroscopy of **6k**

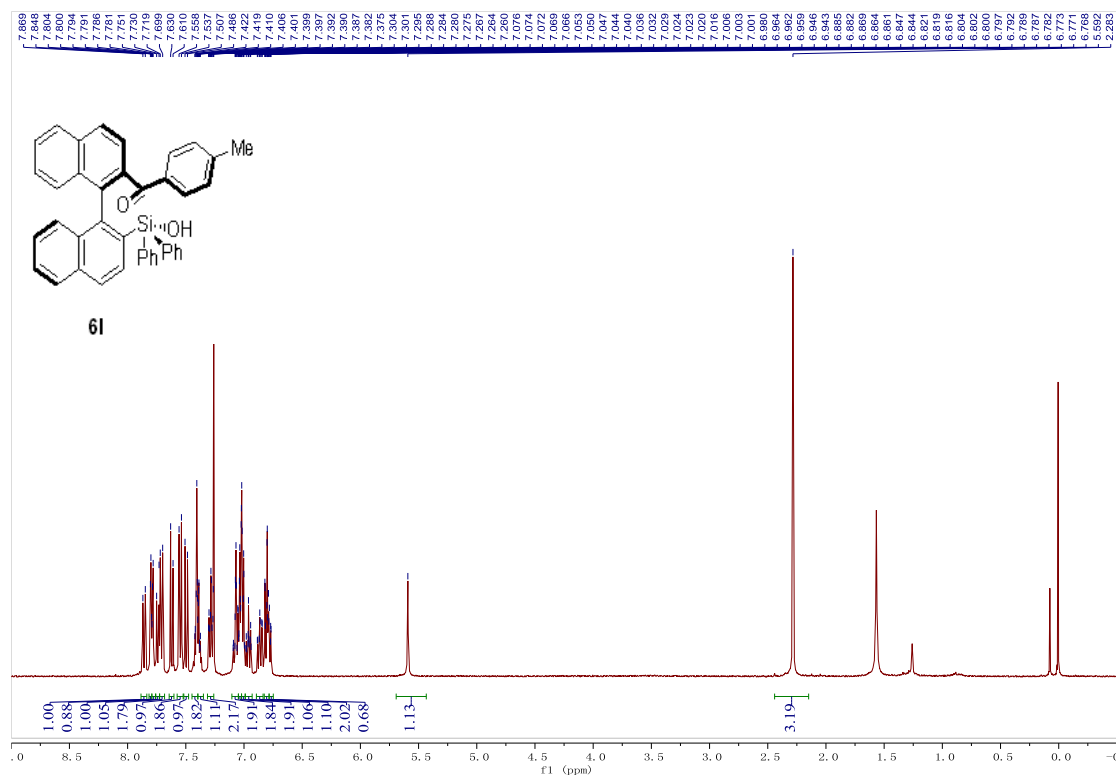

Supplementary Figure 76.  $^1\text{H}$  NMR spectroscopy of **6l**

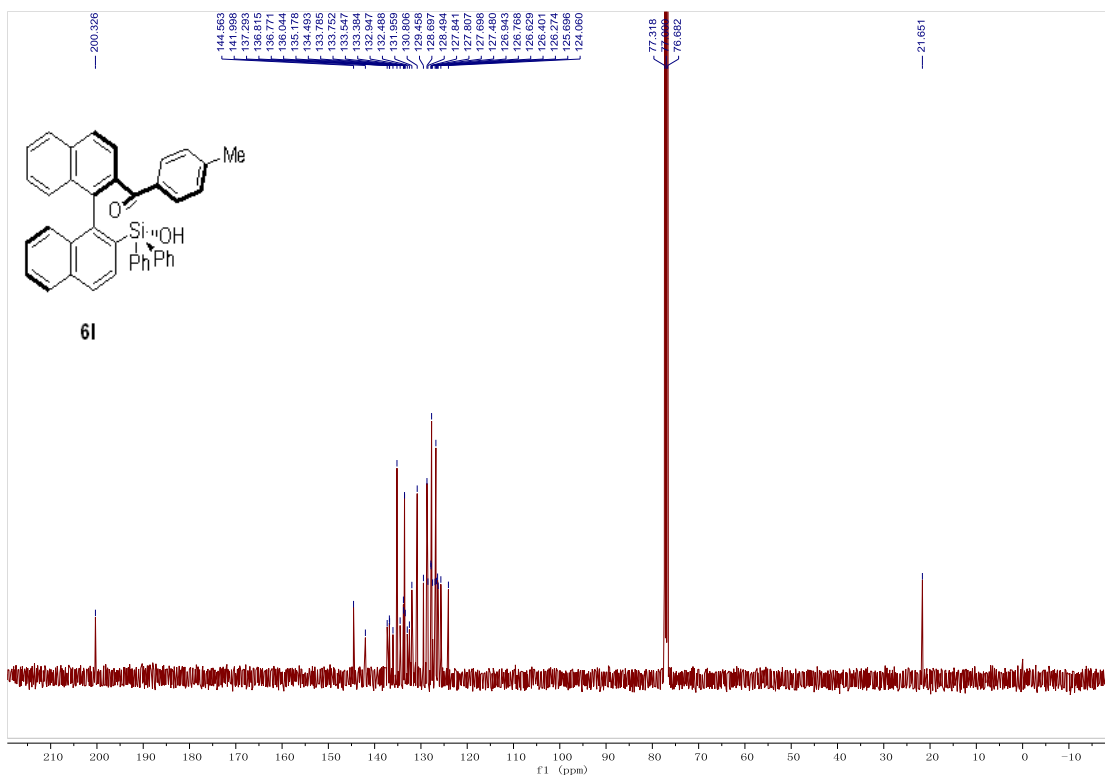

Supplementary Figure 77. <sup>13</sup>C NMR spectroscopy of **6l**

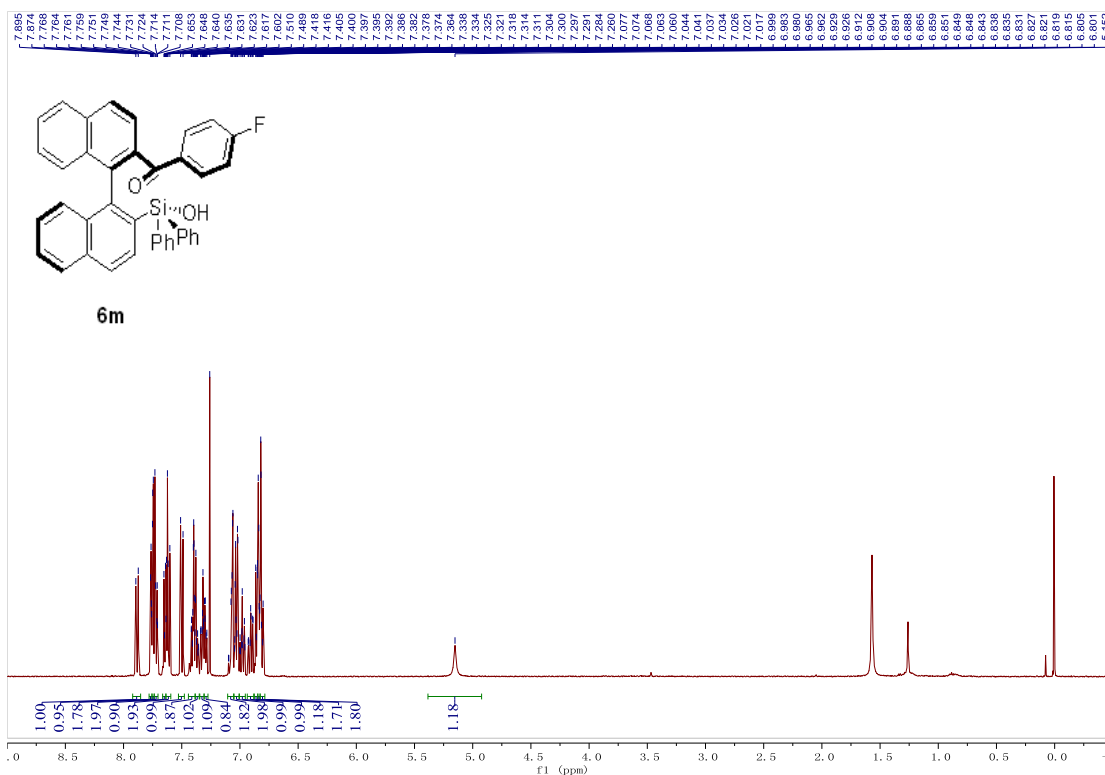

Supplementary Figure 78. <sup>1</sup>H NMR spectroscopy of **6m**

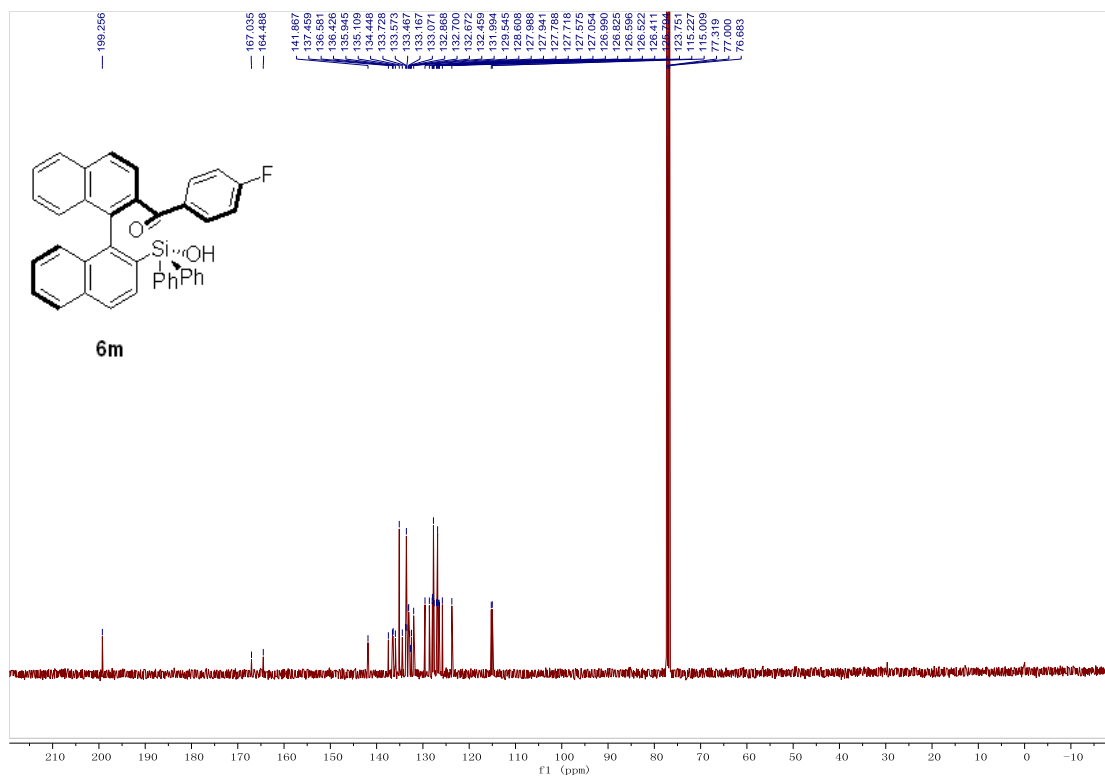

Supplementary Figure 79. <sup>13</sup>C NMR spectroscopy of **6m**

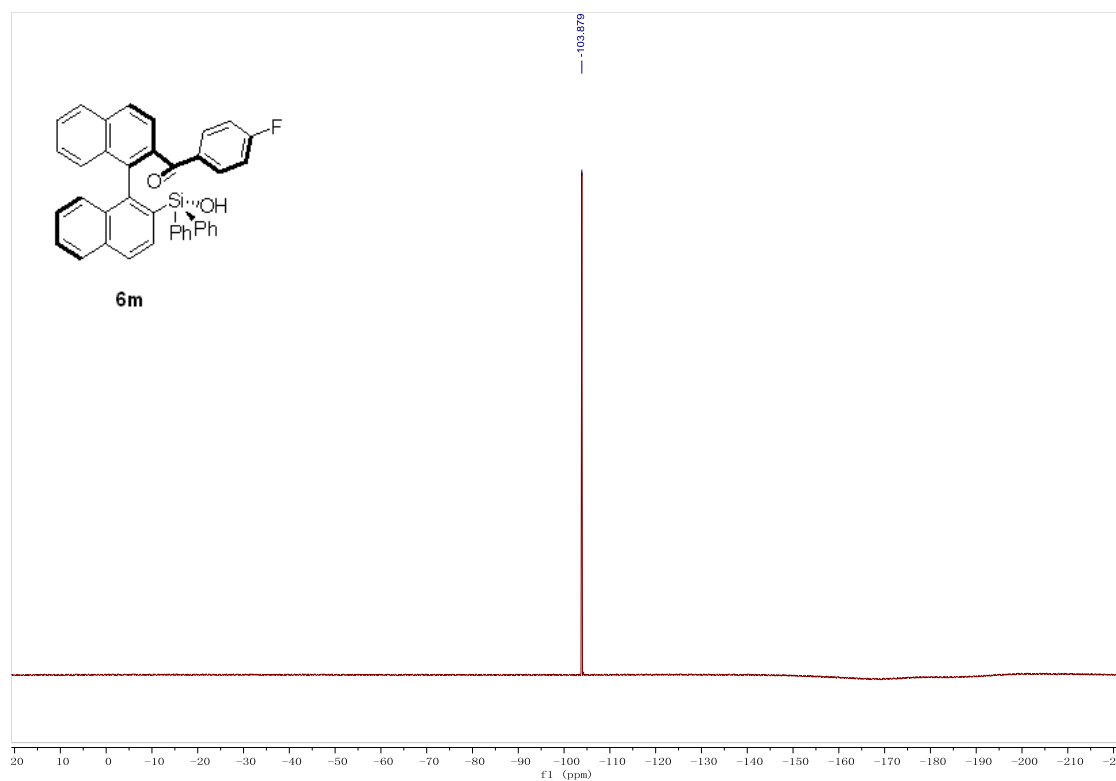

Supplementary Figure 80. <sup>19</sup>F NMR spectroscopy of **6m**

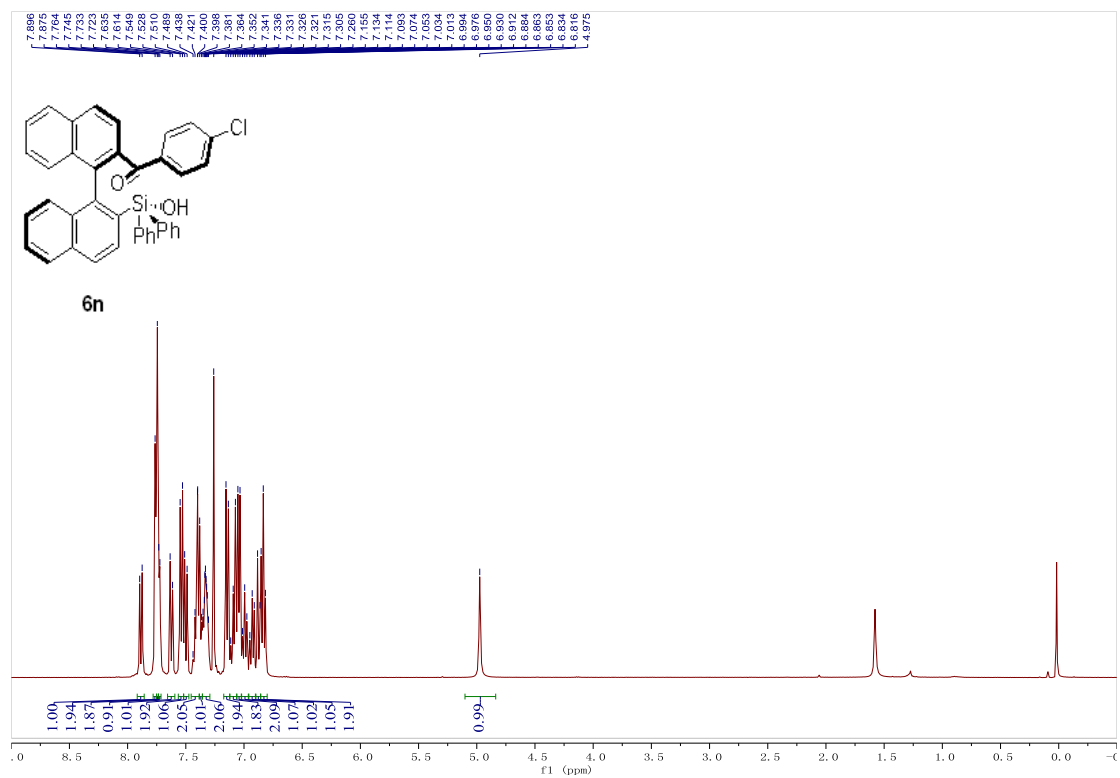

Supplementary Figure 81.  $^1\text{H}$  NMR spectroscopy of **6n**

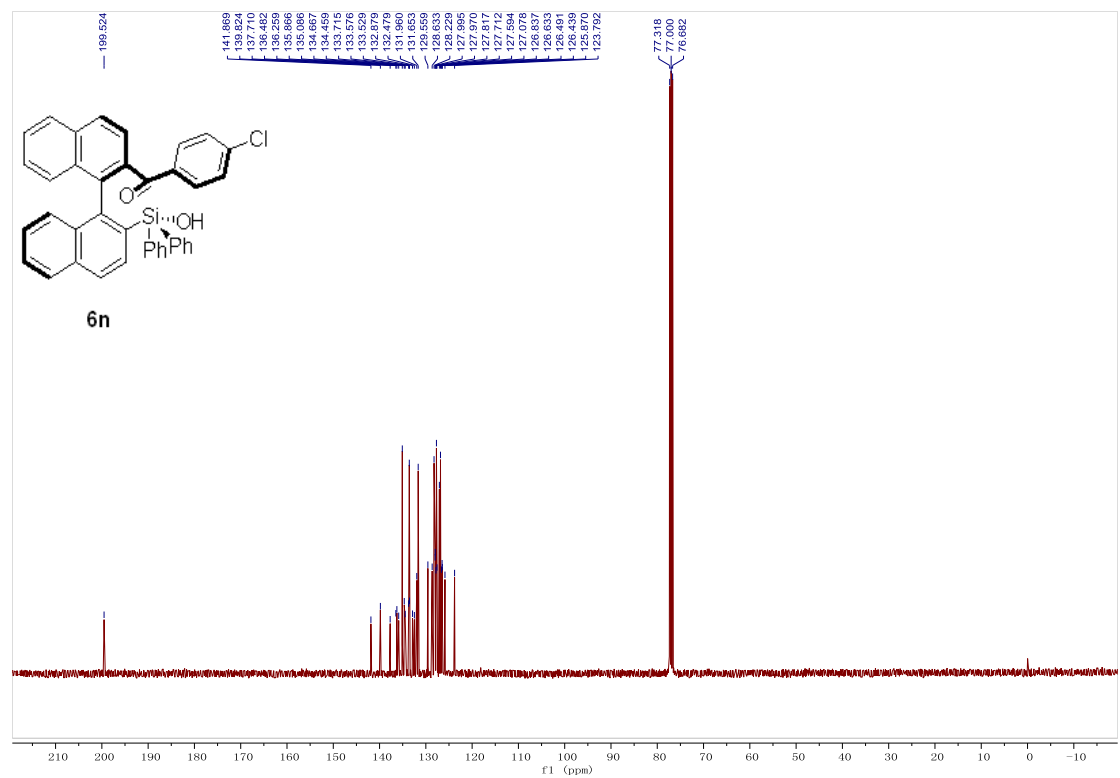

Supplementary Figure 82.  $^{13}\text{C}$  NMR spectroscopy of **6n**



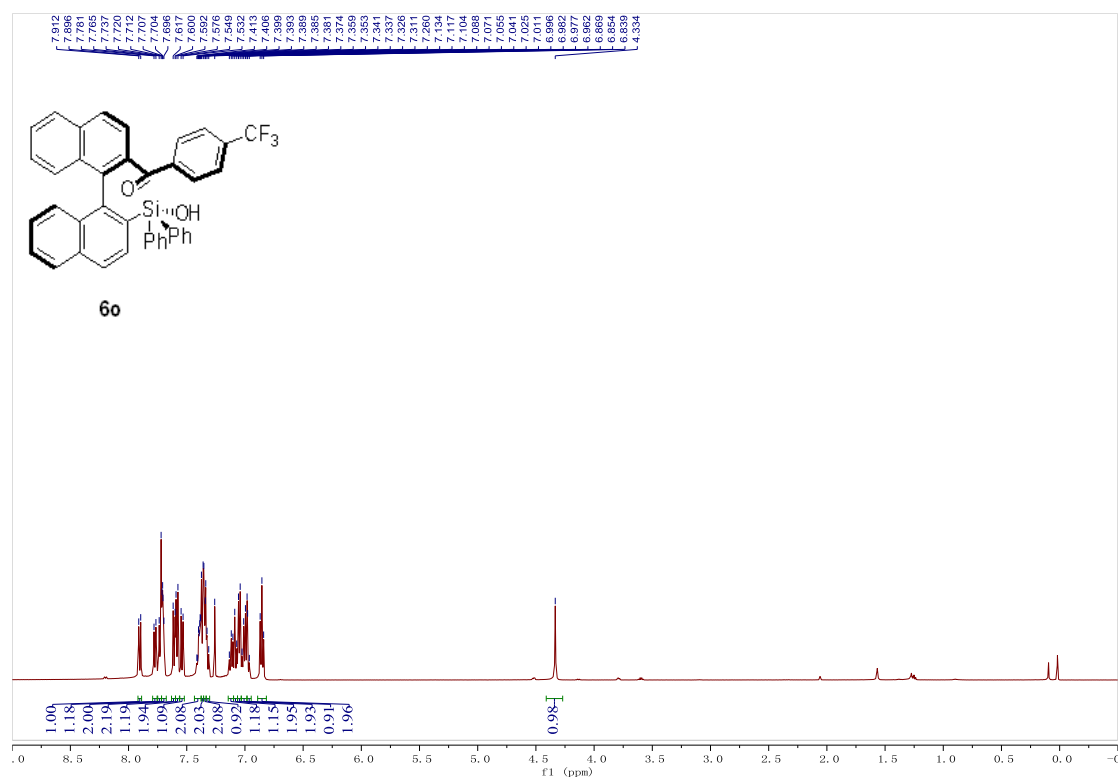

Supplementary Figure 83. <sup>1</sup>H NMR spectroscopy of **6o**

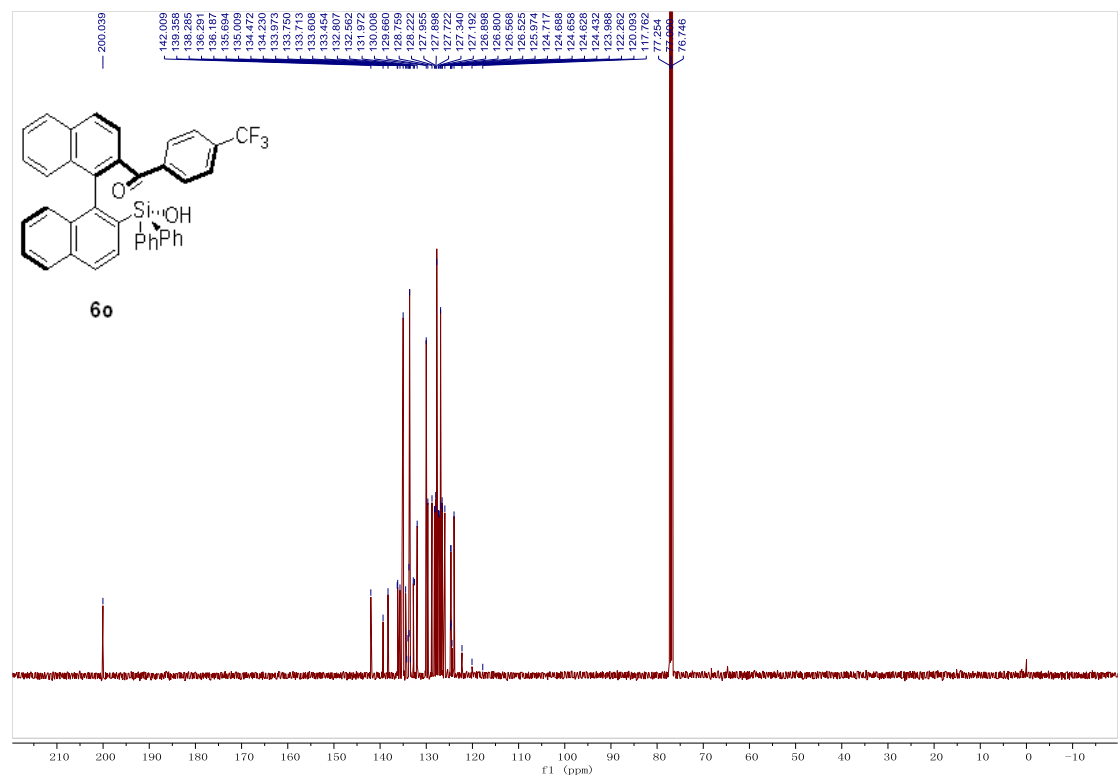

Supplementary Figure 84. <sup>13</sup>C NMR spectroscopy of **6o**

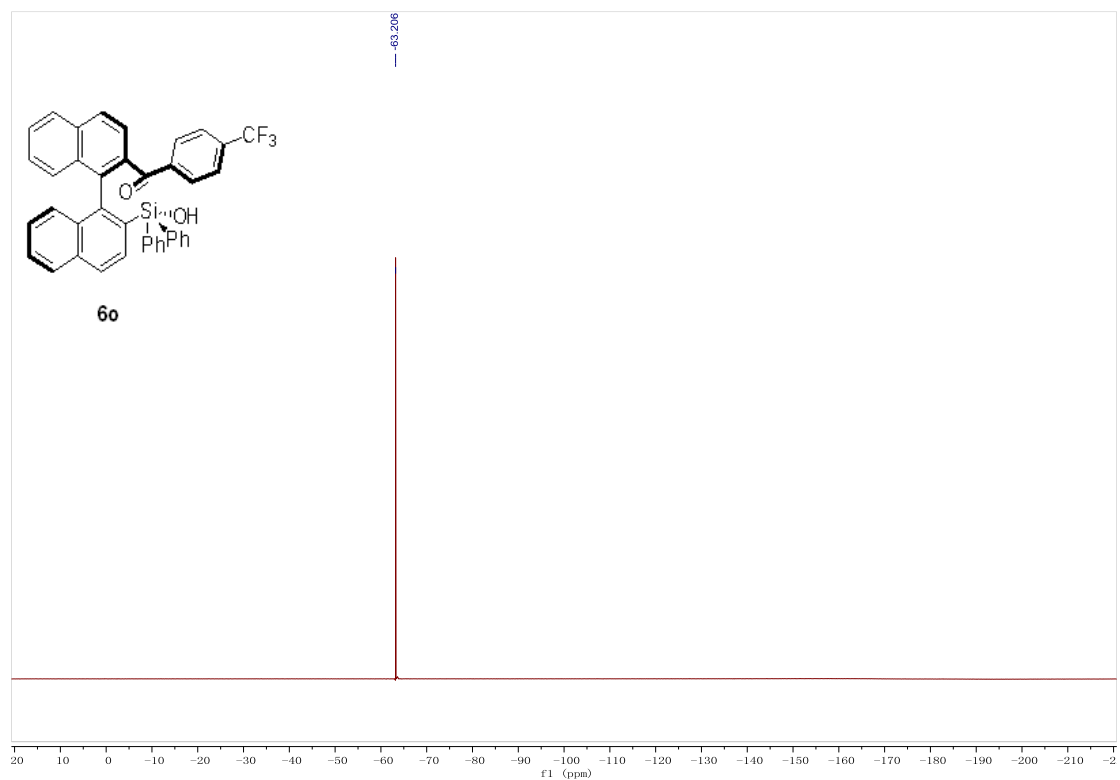

Supplementary Figure 85.  $^{19}\text{F}$  NMR spectroscopy of **6o**

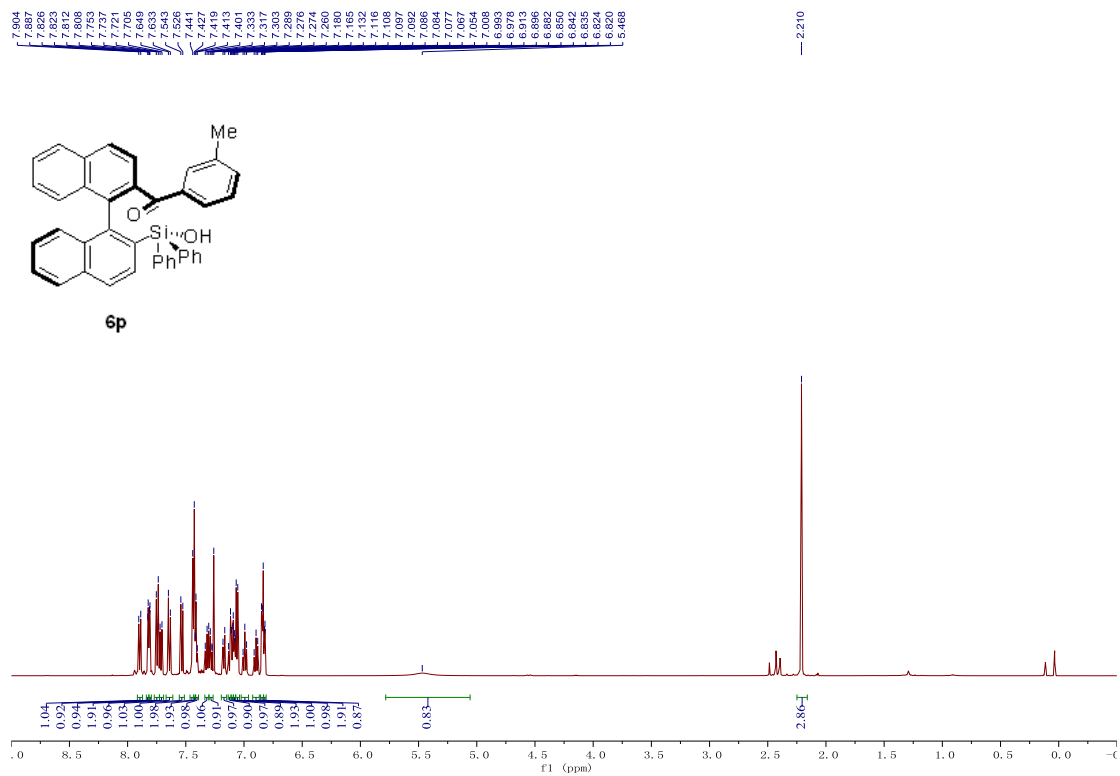

Supplementary Figure 86.  $^1\text{H}$  NMR spectroscopy of **6p**

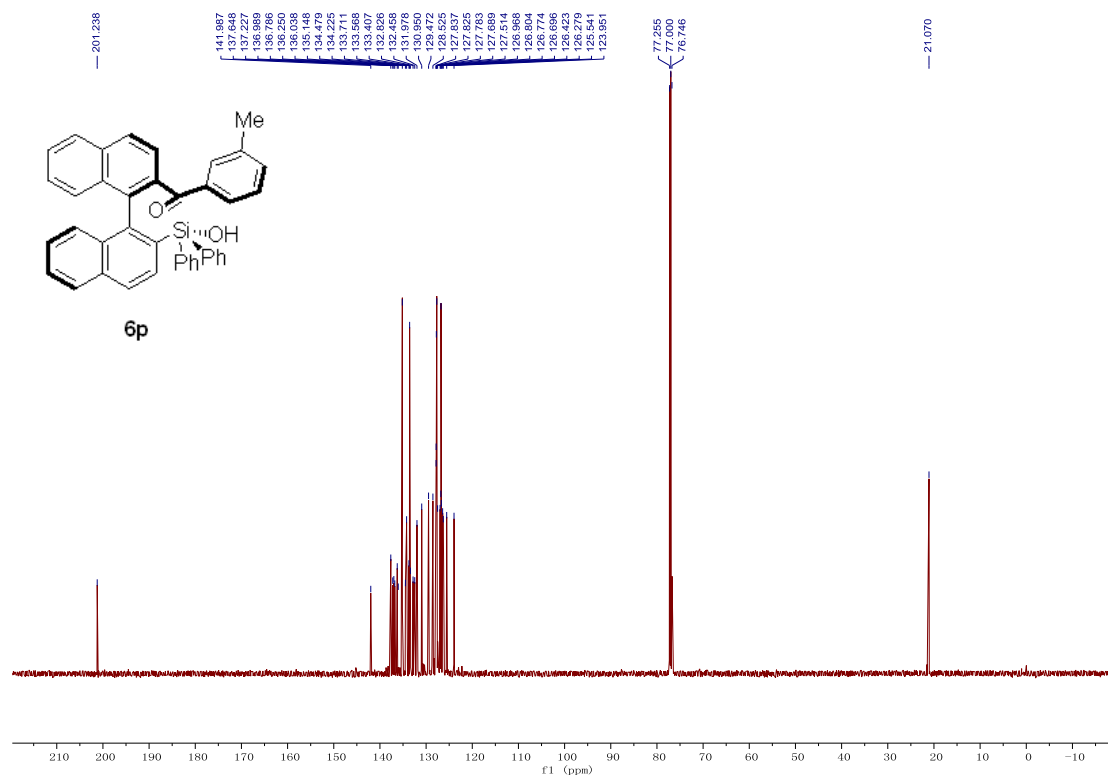

Supplementary Figure 87. <sup>13</sup>C NMR spectroscopy of **6p**

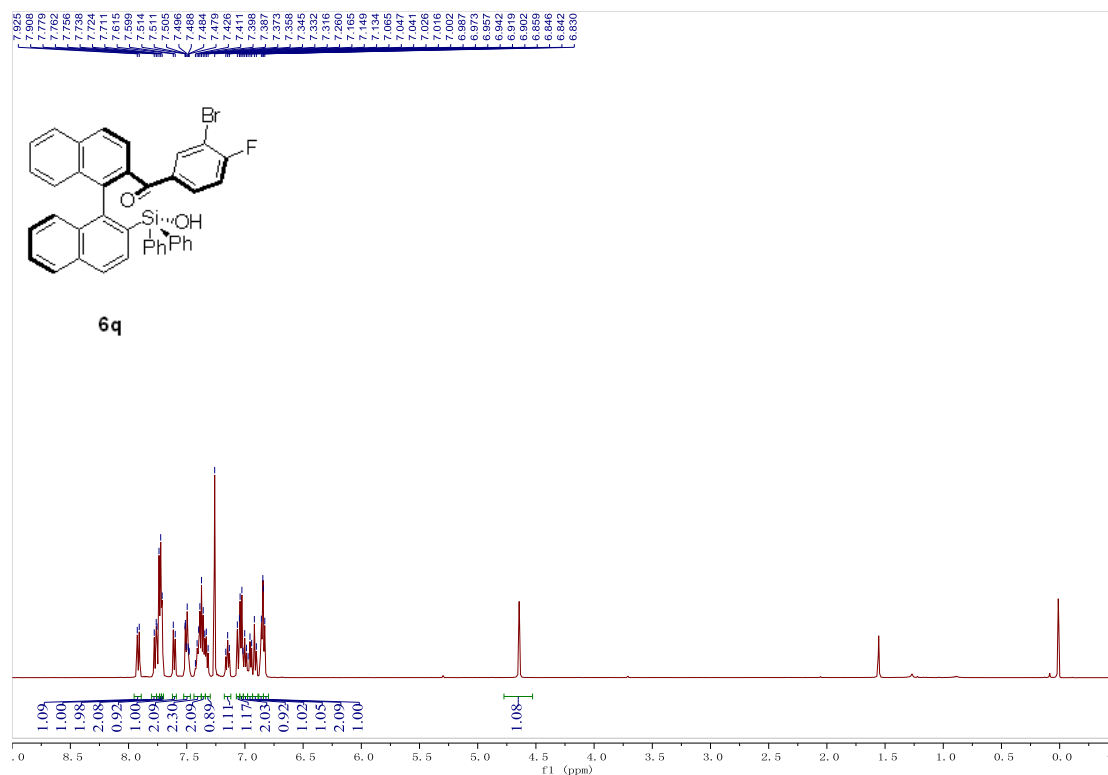

Supplementary Figure 88. <sup>1</sup>H NMR spectroscopy of **6q**

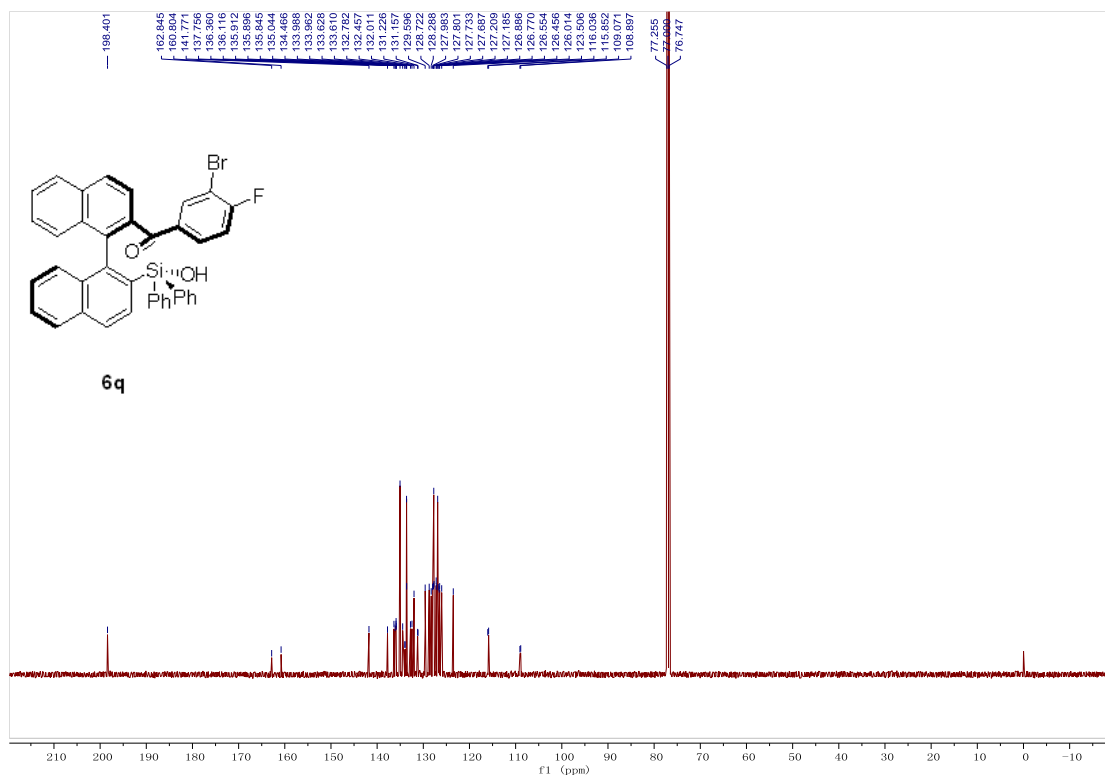

Supplementary Figure 89.  $^{13}\text{C}$  NMR spectroscopy of **6q**

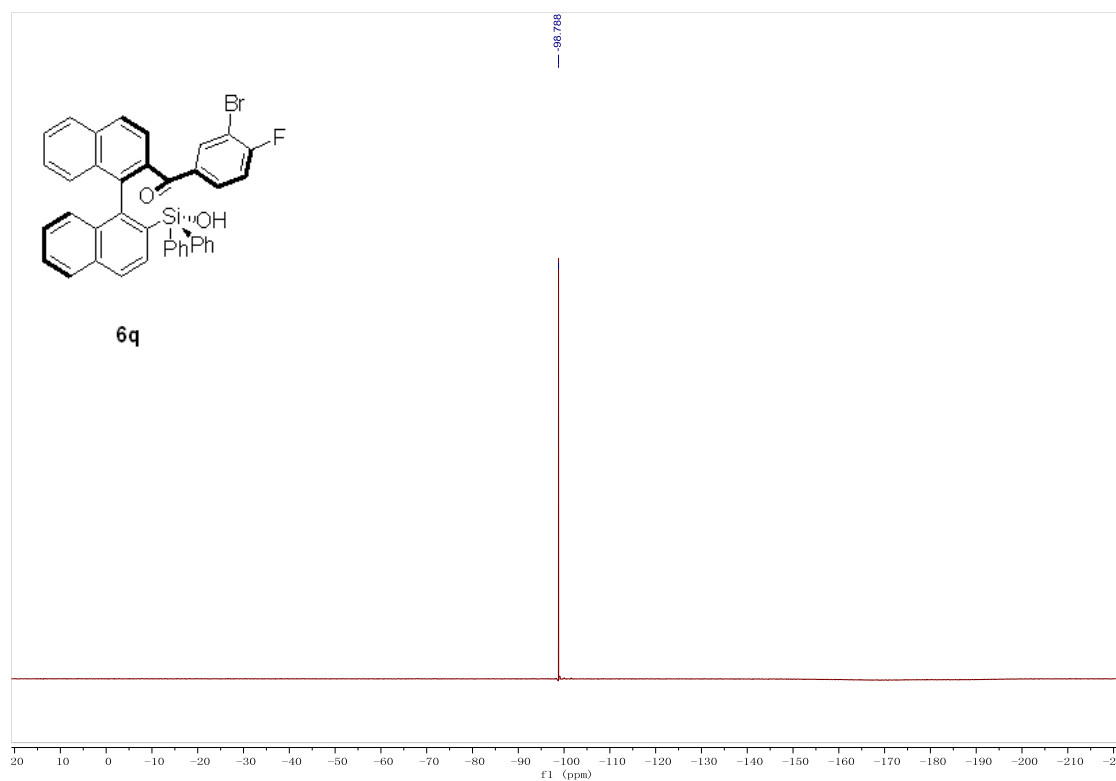

Supplementary Figure 90.  $^{19}\text{F}$  NMR spectroscopy of **6q**

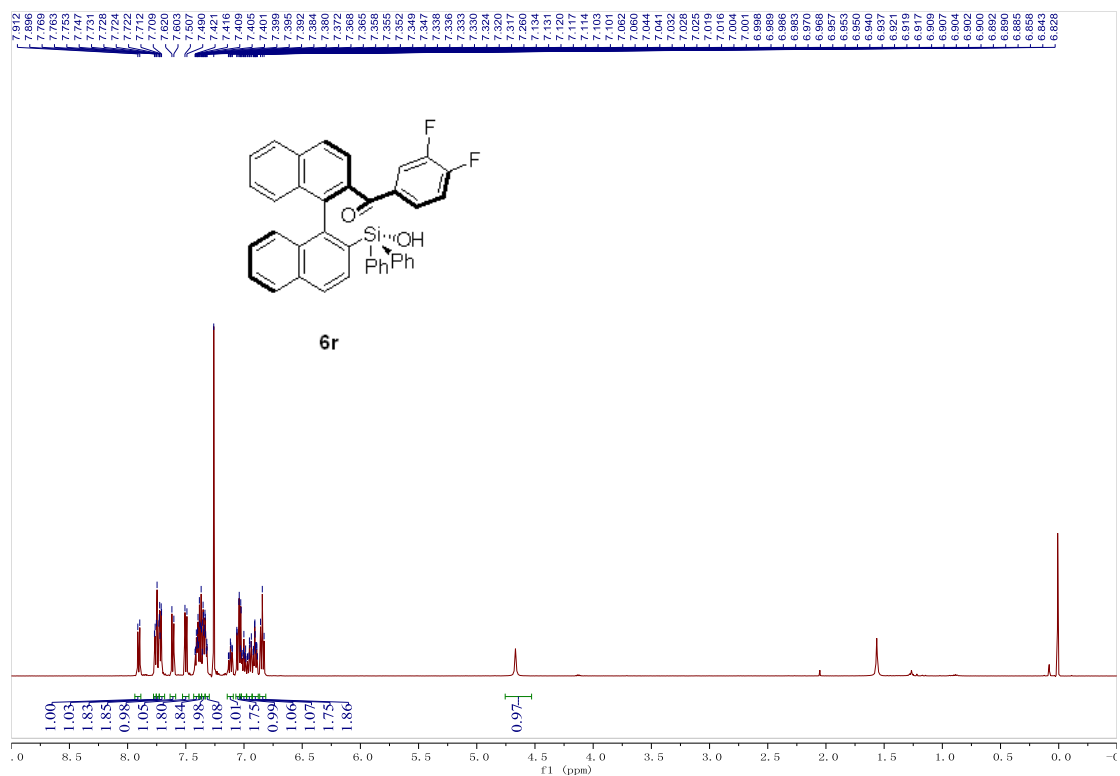

Supplementary Figure 91. <sup>1</sup>H NMR spectroscopy of **6r**

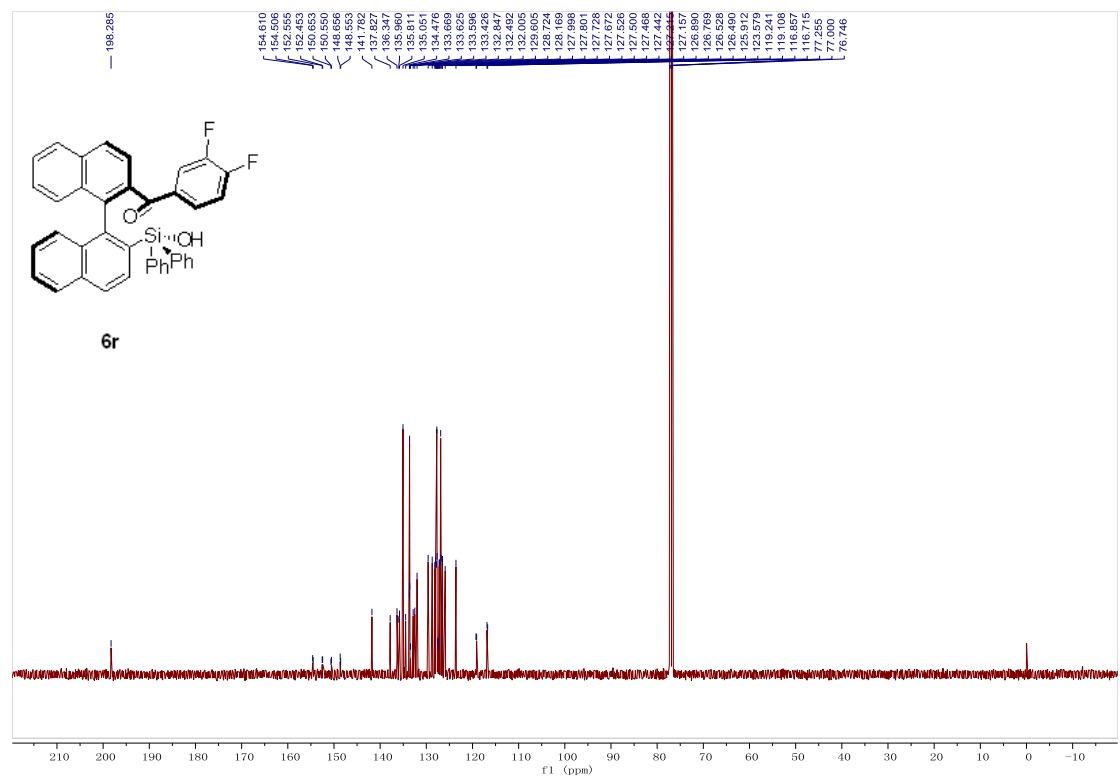

Supplementary Figure 92. <sup>13</sup>C NMR spectroscopy of **6r**

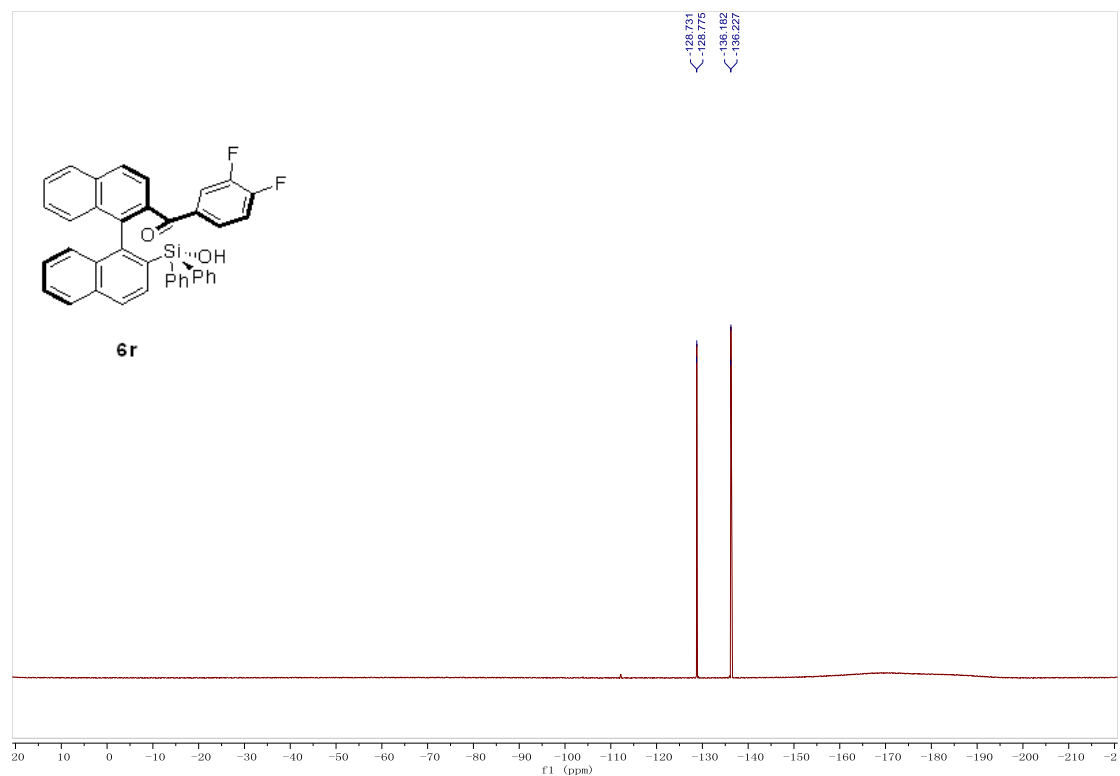

Supplementary Figure 93.  $^{19}\text{F}$  NMR spectroscopy of **6r**

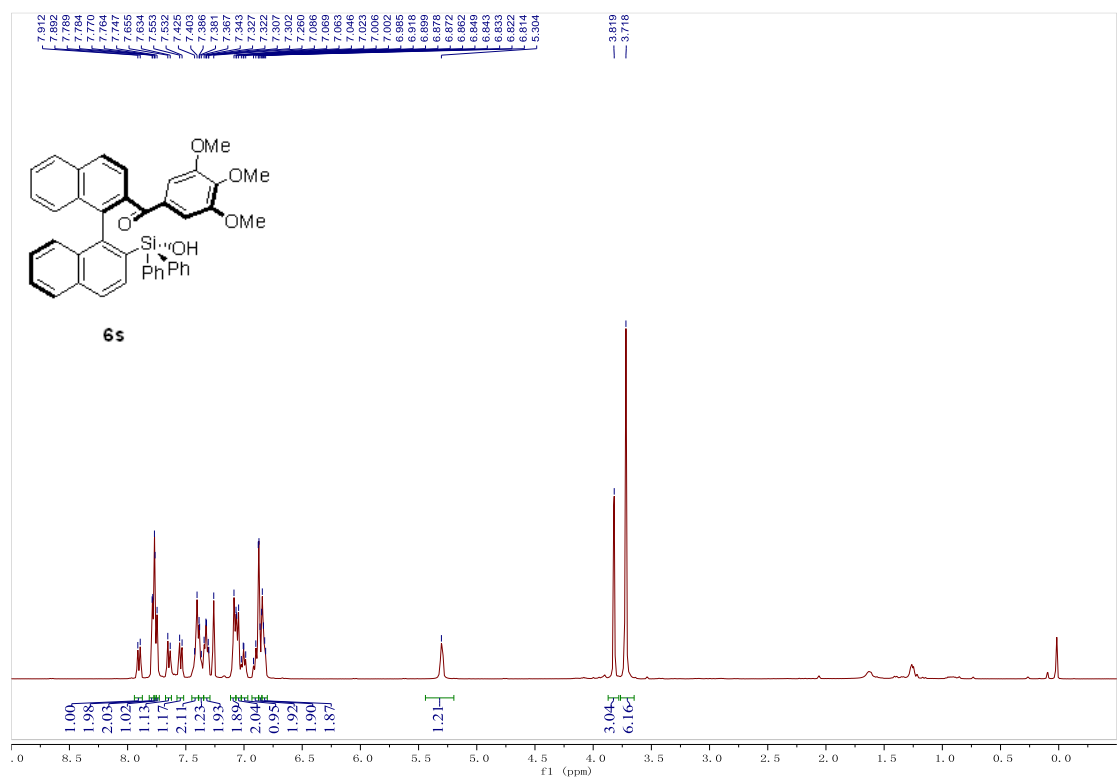

Supplementary Figure 94.  $^1\text{H}$  NMR spectroscopy of **6s**

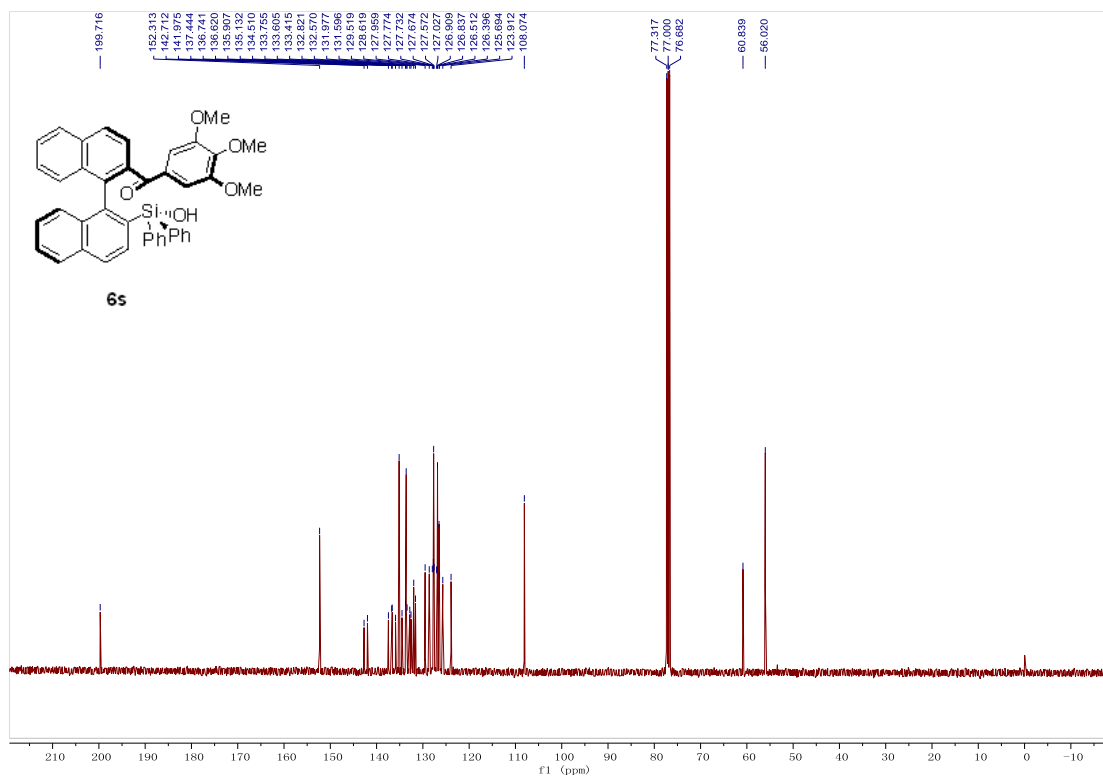

Supplementary Figure 95.  $^{13}\text{C}$  NMR spectroscopy of **6s**

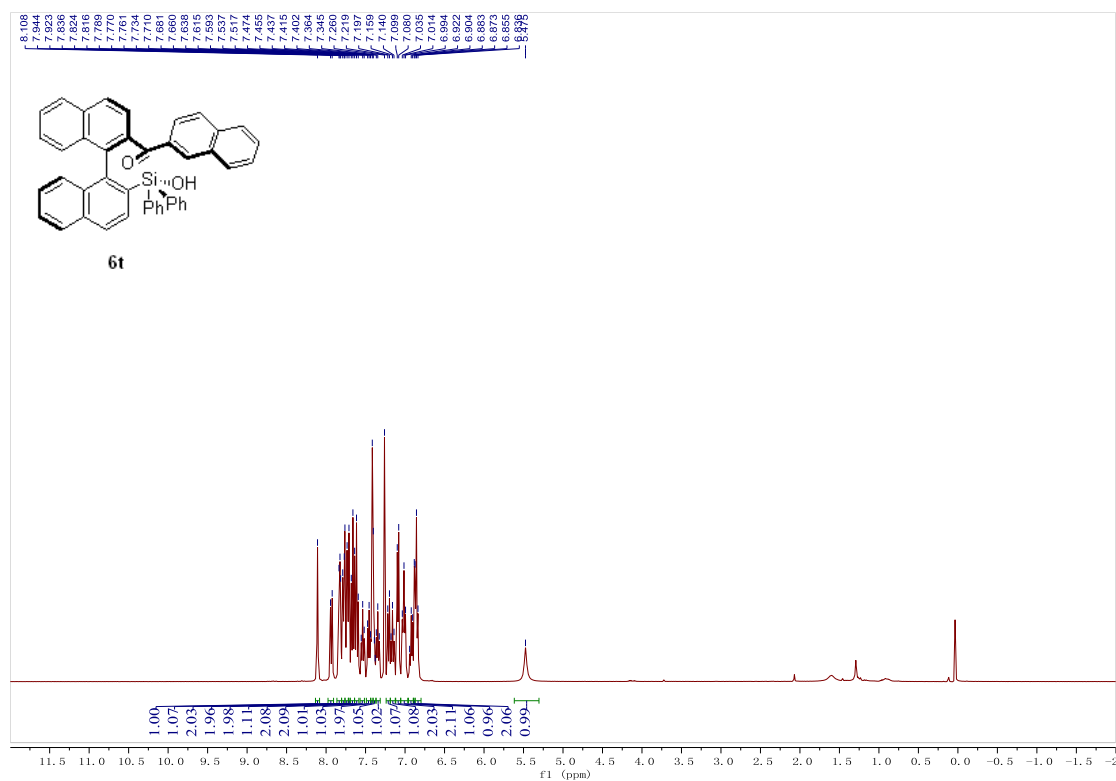

Supplementary Figure 96.  $^1\text{H}$  NMR spectroscopy of **6t**

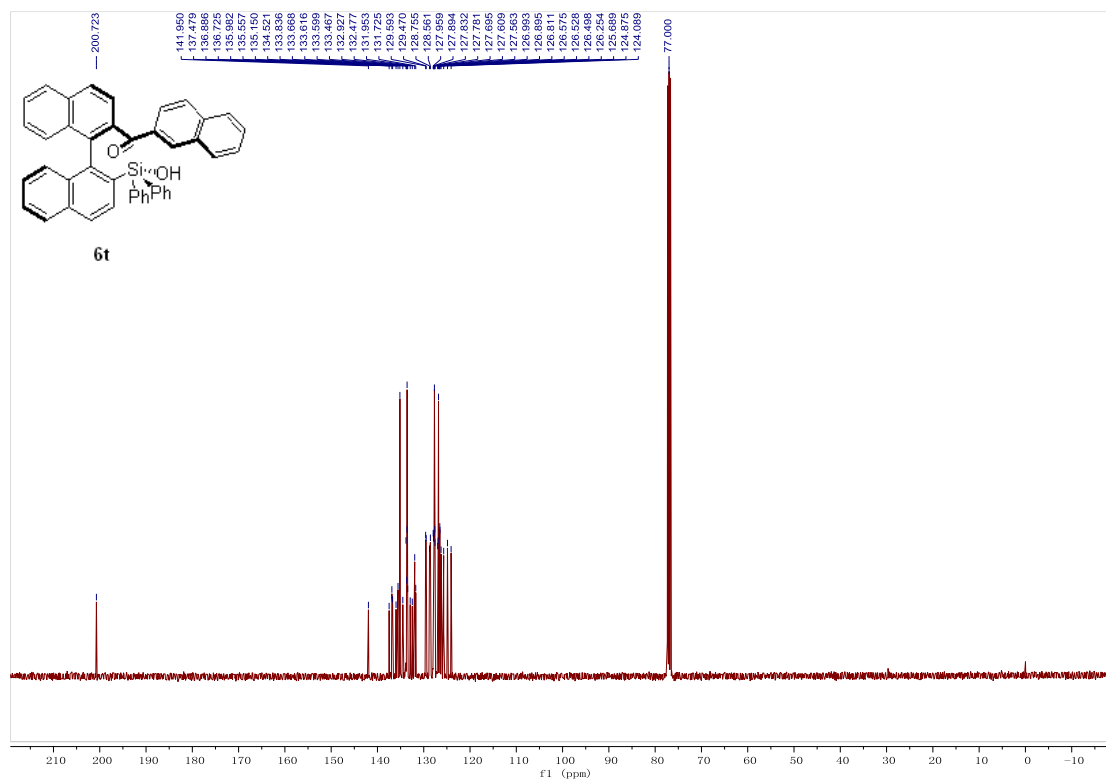

Supplementary Figure 97. <sup>13</sup>C NMR spectroscopy of **6t**

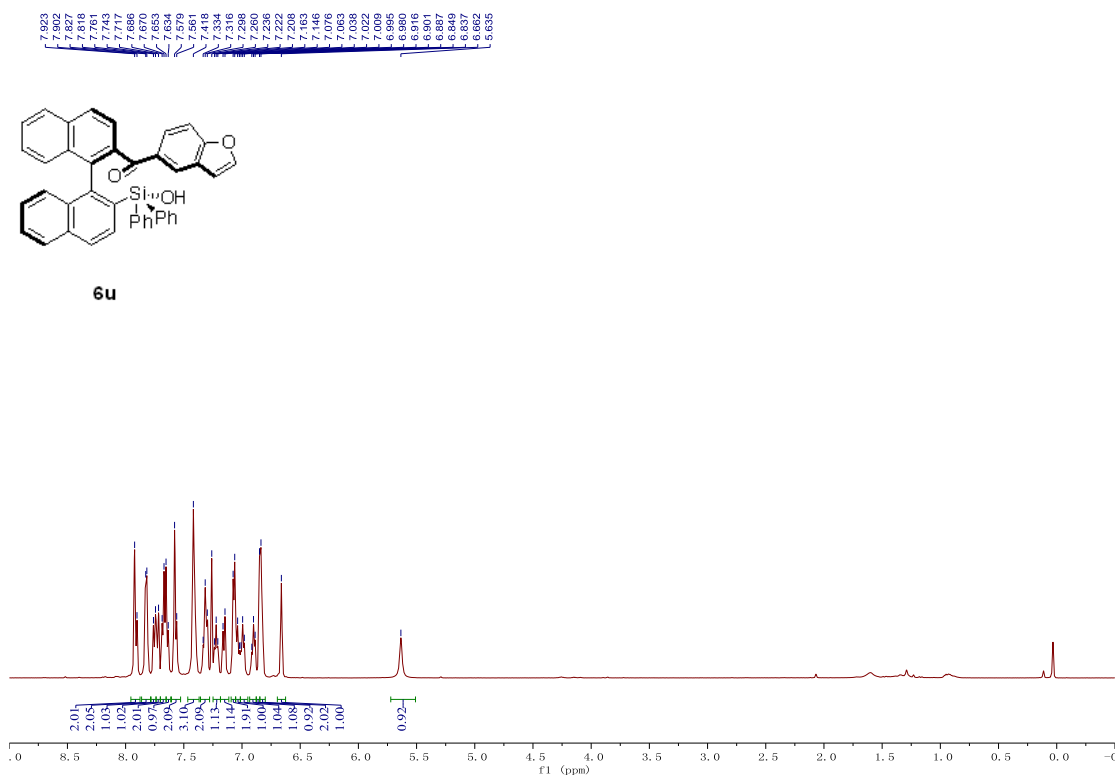

Supplementary Figure 98. <sup>1</sup>H NMR spectroscopy of **6u**



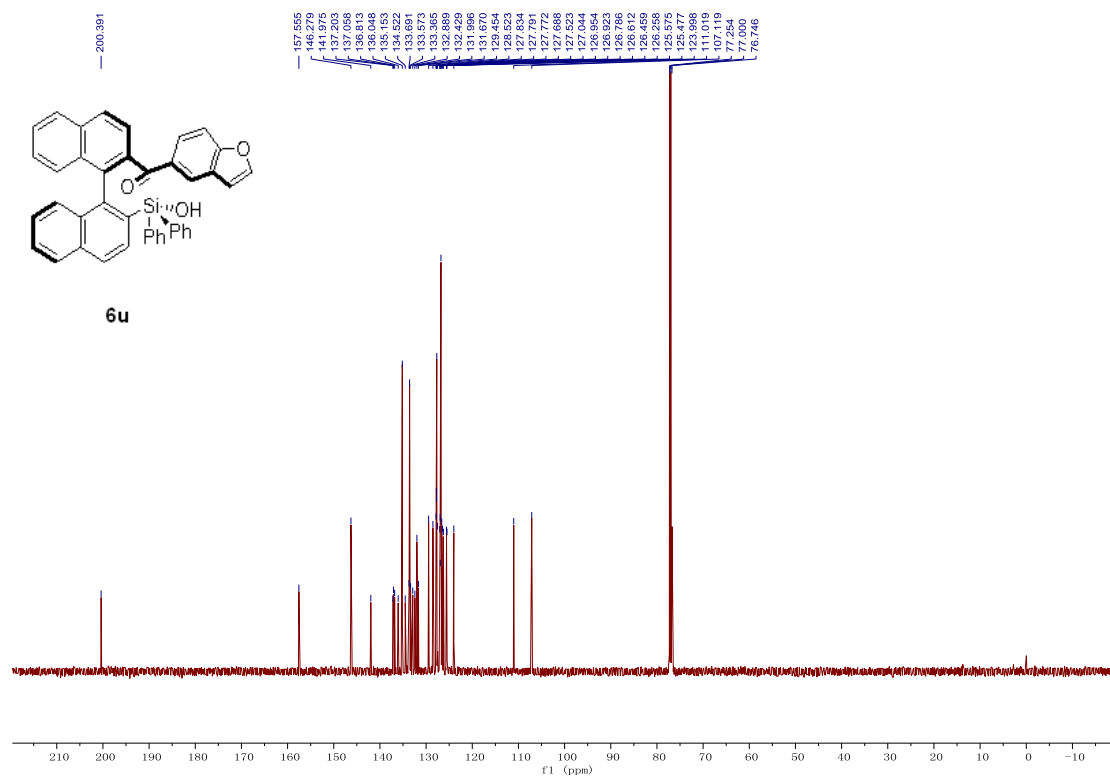

Supplementary Figure 99.  $^{13}\text{C}$  NMR spectroscopy of **6u**

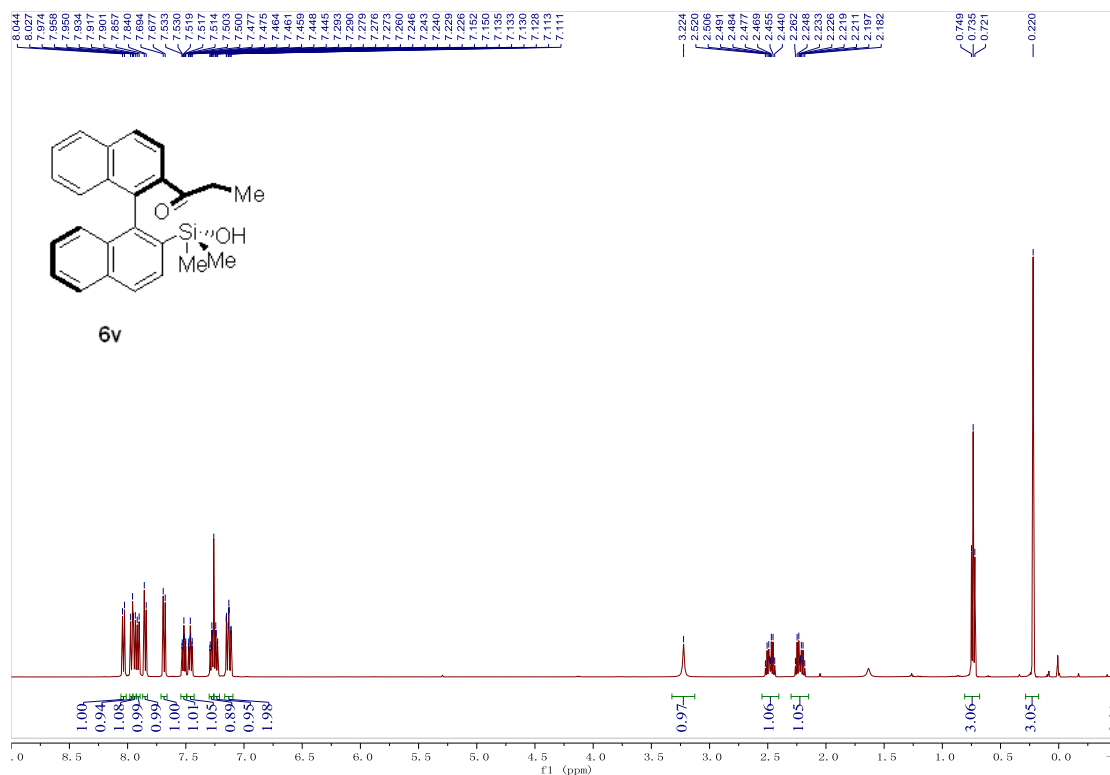

Supplementary Figure 100.  $^1\text{H}$  NMR spectroscopy of **6v**

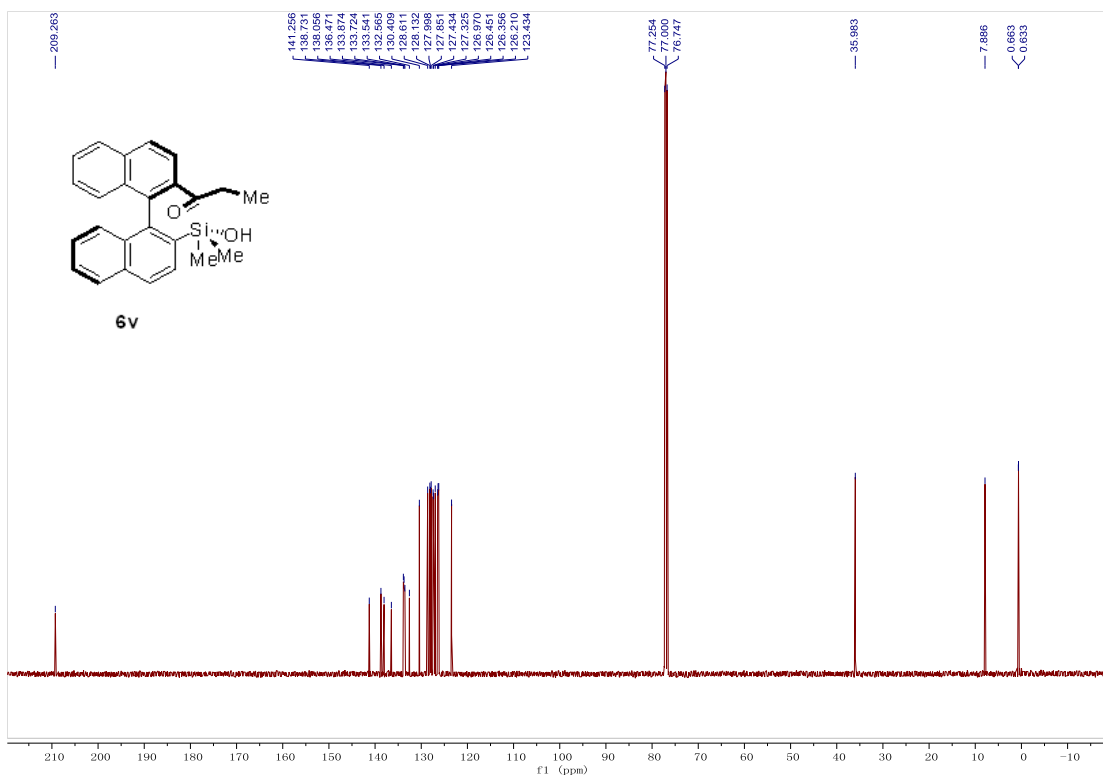

Supplementary Figure 101.  $^{13}\text{C}$  NMR spectroscopy of **6v**

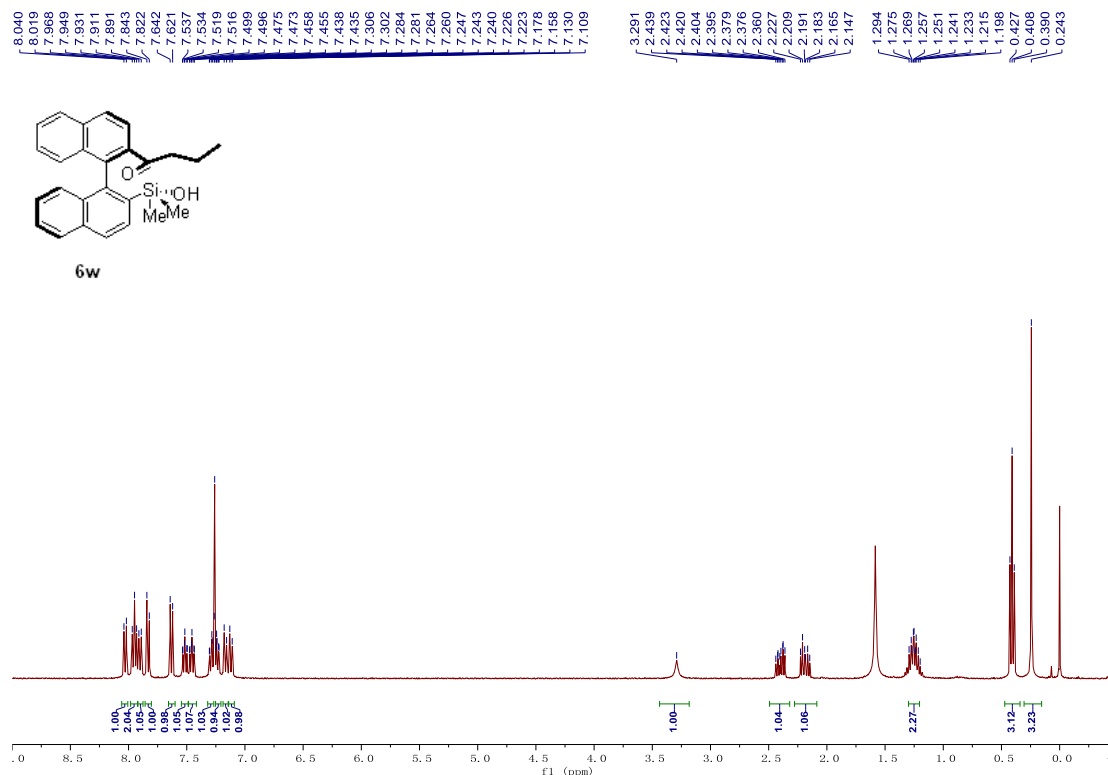

Supplementary Figure 102.  $^1\text{H}$  NMR spectroscopy of **6w**

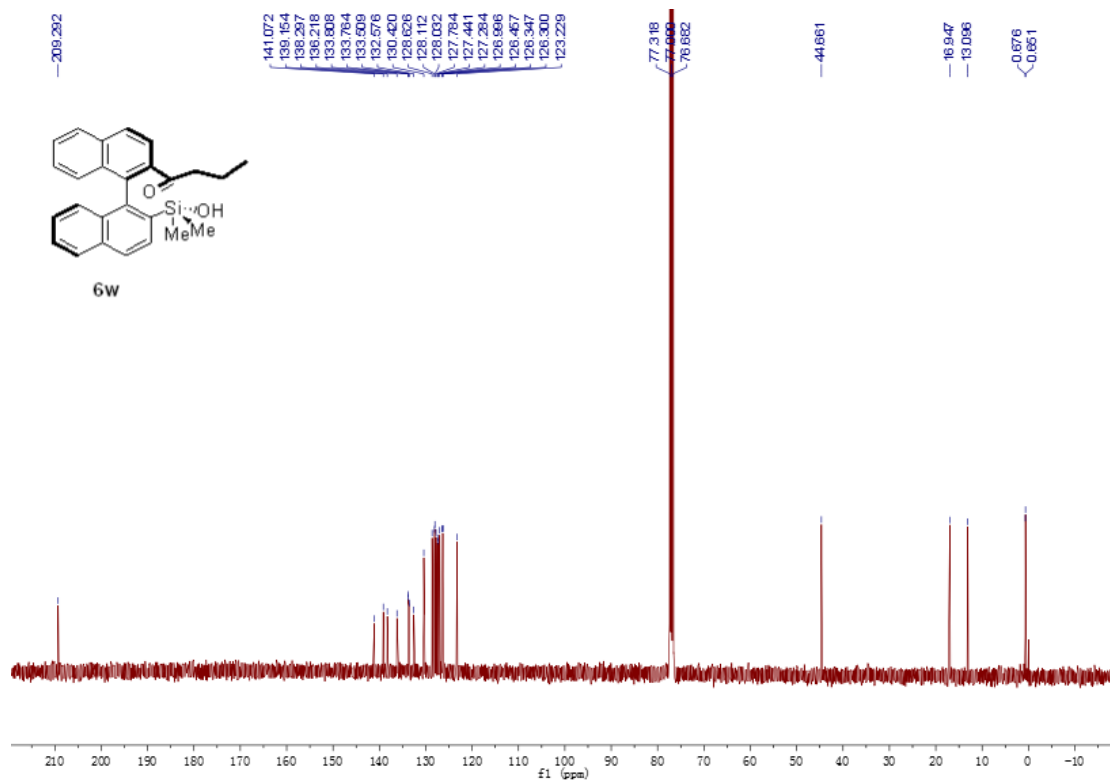

Supplementary Figure 103. <sup>13</sup>C NMR spectroscopy of 6w

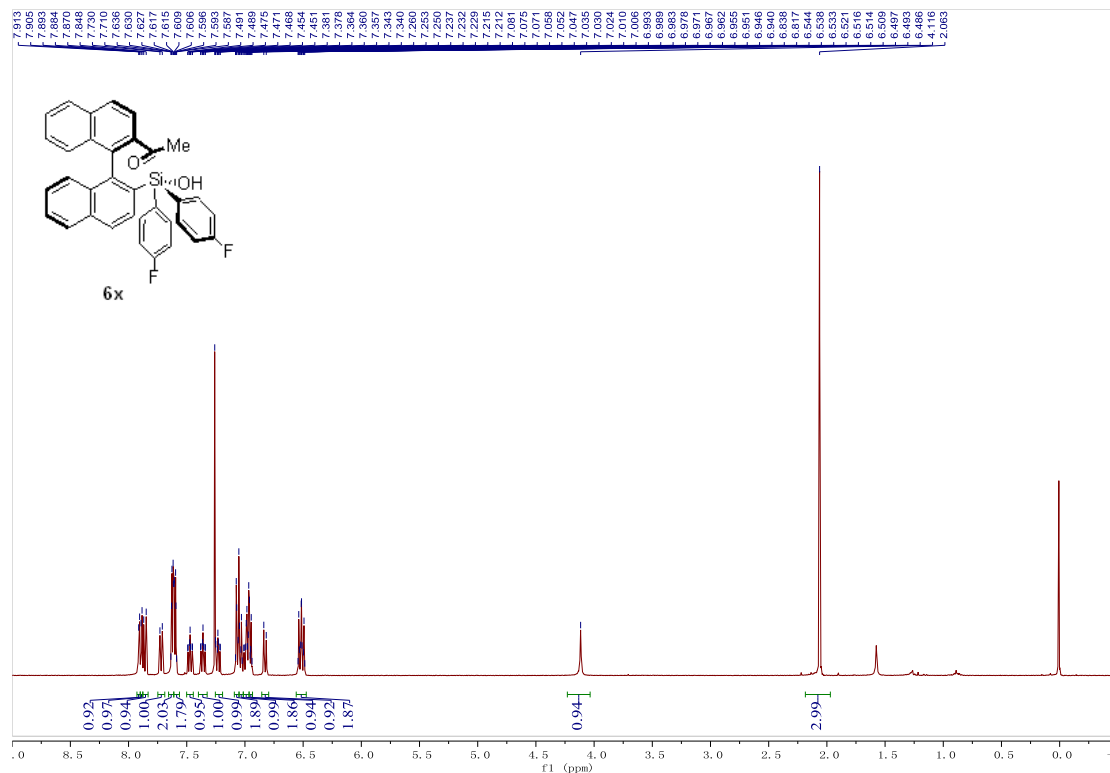

Supplementary Figure 104. <sup>1</sup>H NMR spectroscopy of 6x

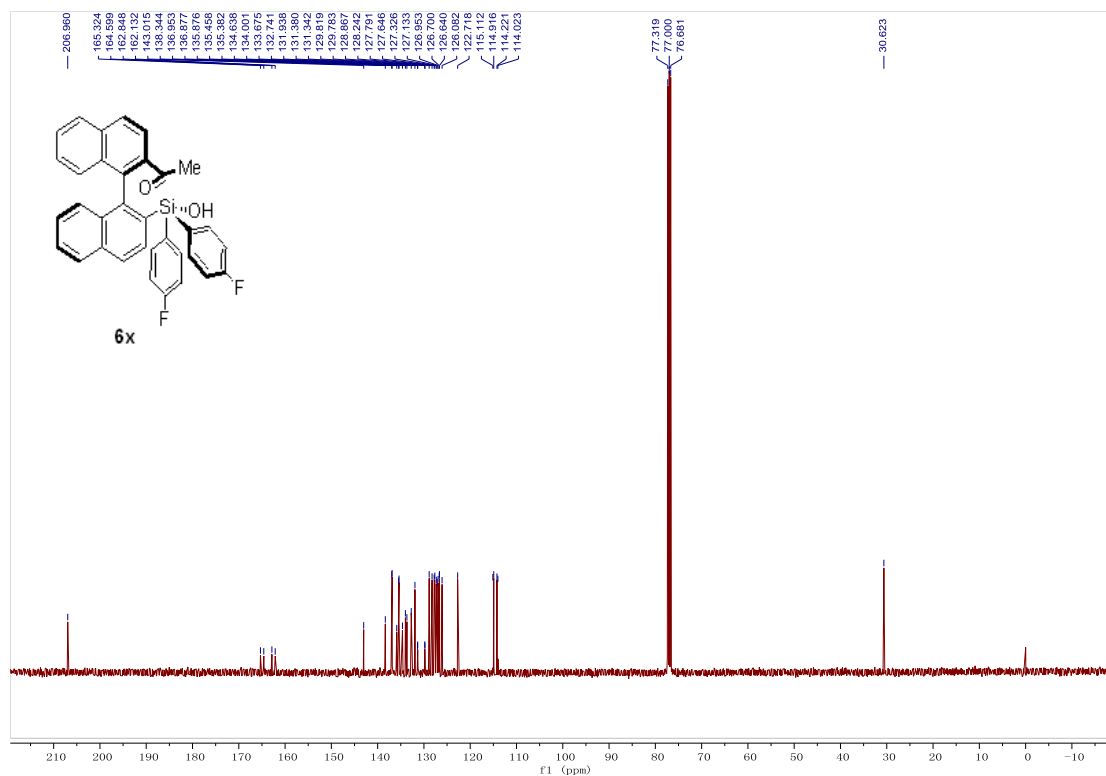

Supplementary Figure 105. <sup>13</sup>C NMR spectroscopy of **6x**

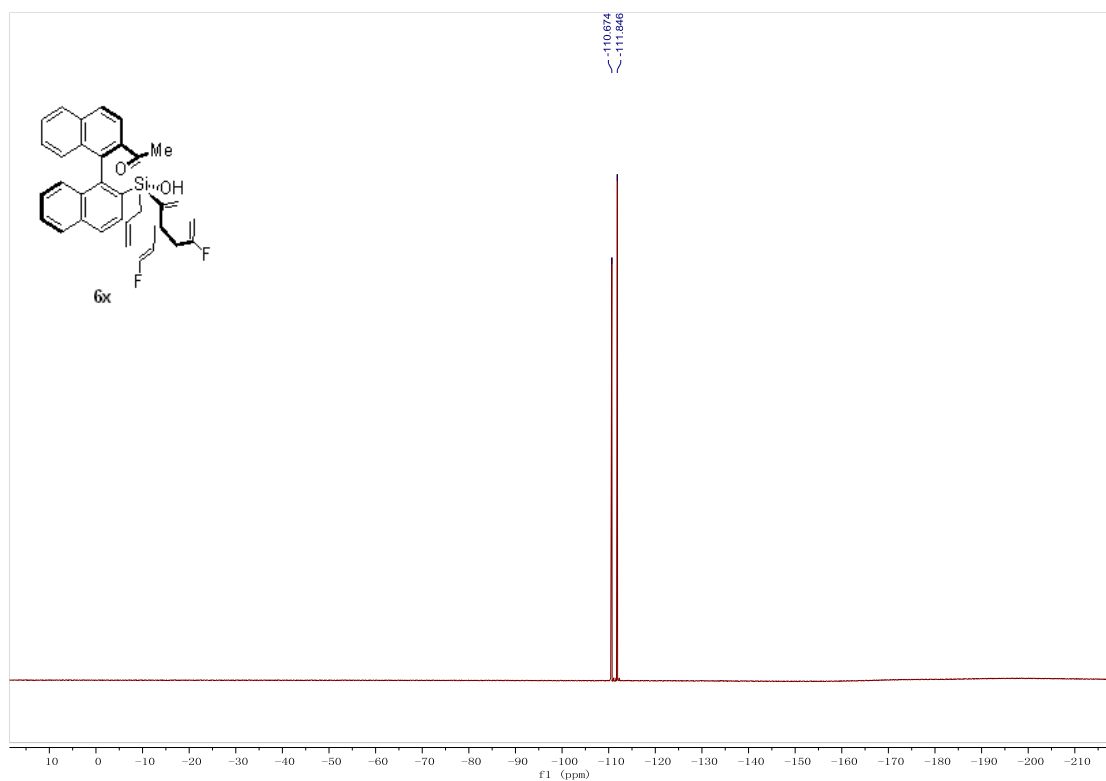

Supplementary Figure 106. <sup>19</sup>F NMR spectroscopy of **6x**

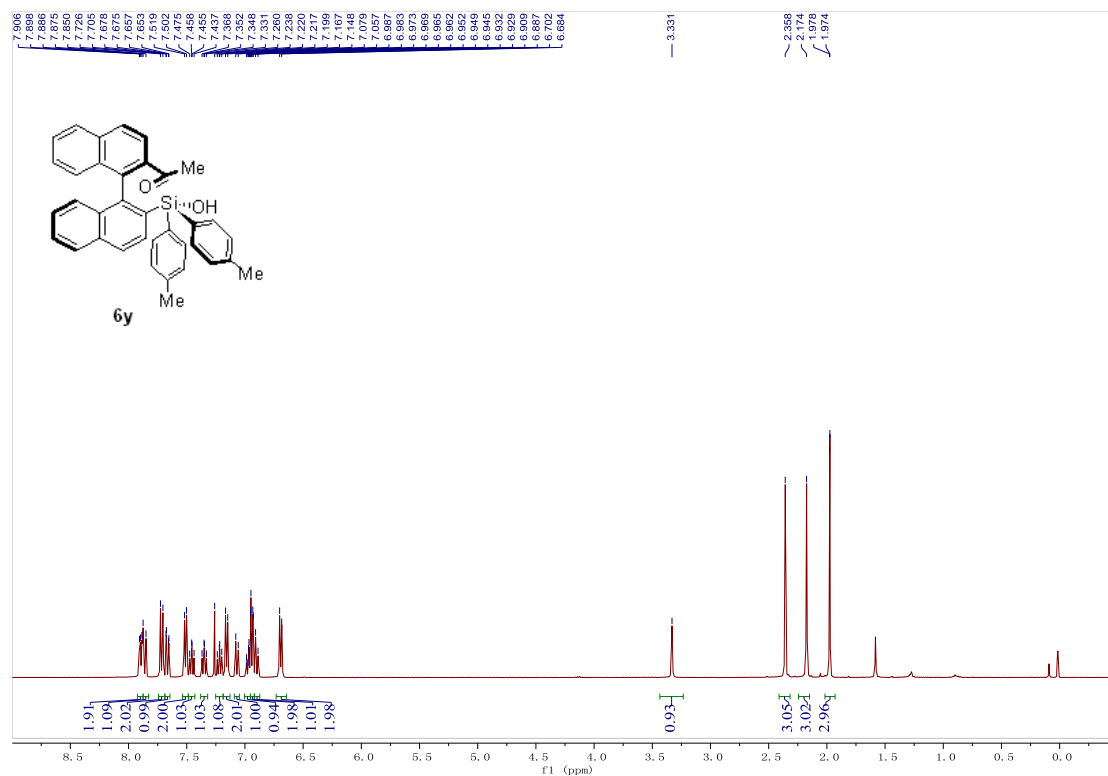

Supplementary Figure 107. <sup>1</sup>H NMR spectroscopy of **6y**

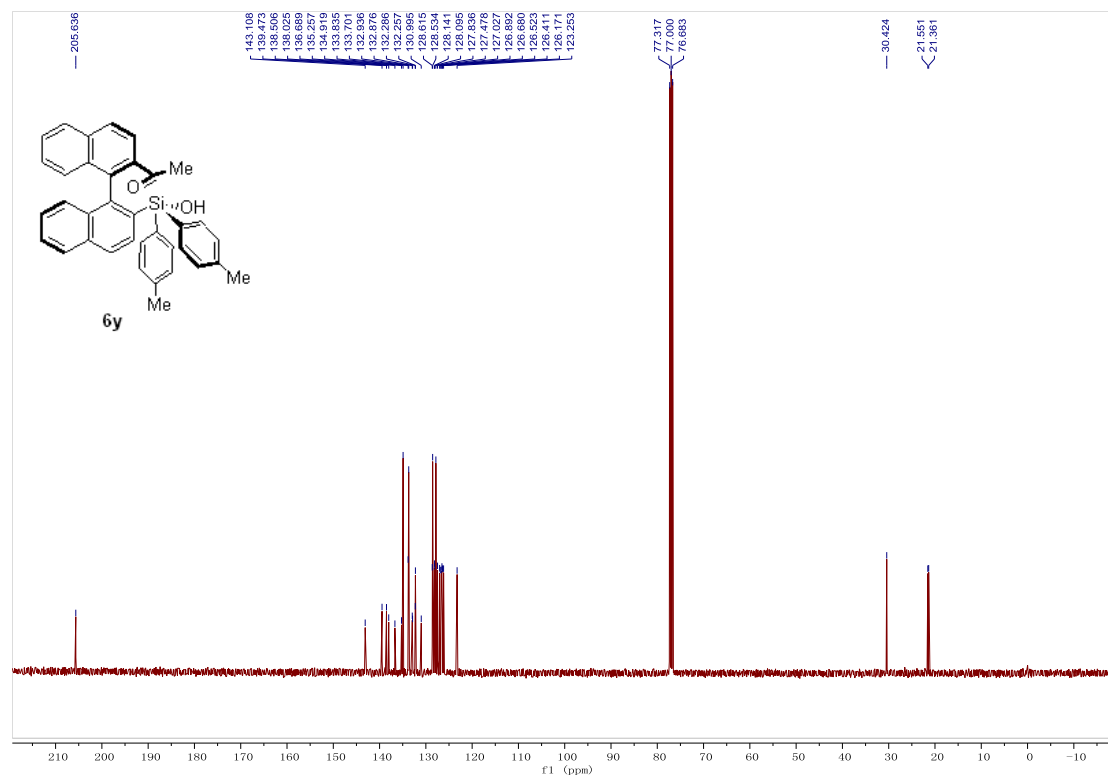

Supplementary Figure 108. <sup>13</sup>C NMR spectroscopy of **6y**

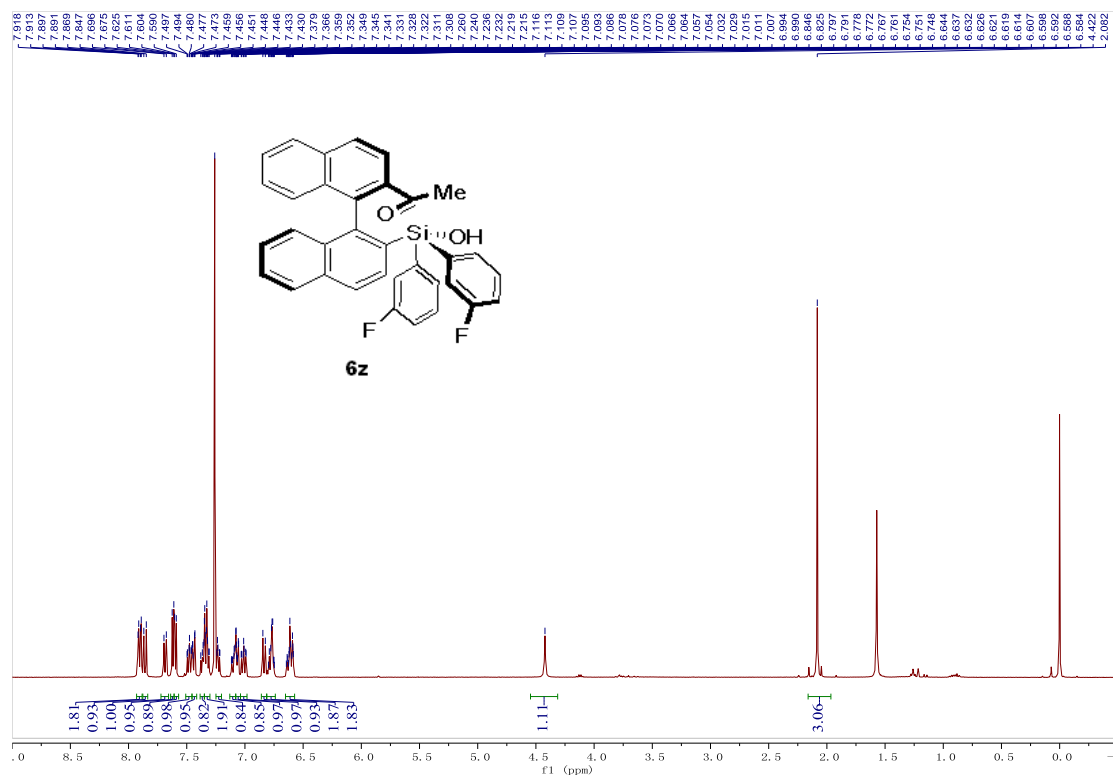

Supplementary Figure 109.  $^1\text{H}$  NMR spectroscopy of **6z**

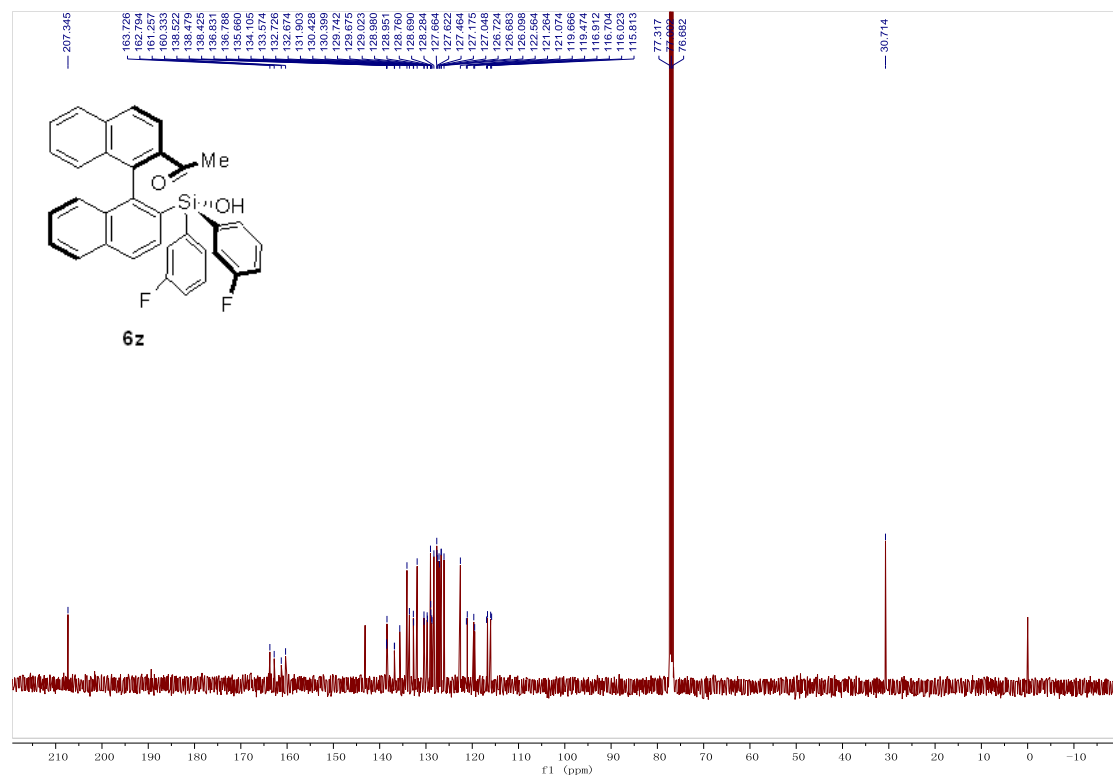

Supplementary Figure 110.  $^{13}\text{C}$  NMR spectroscopy of **6z**

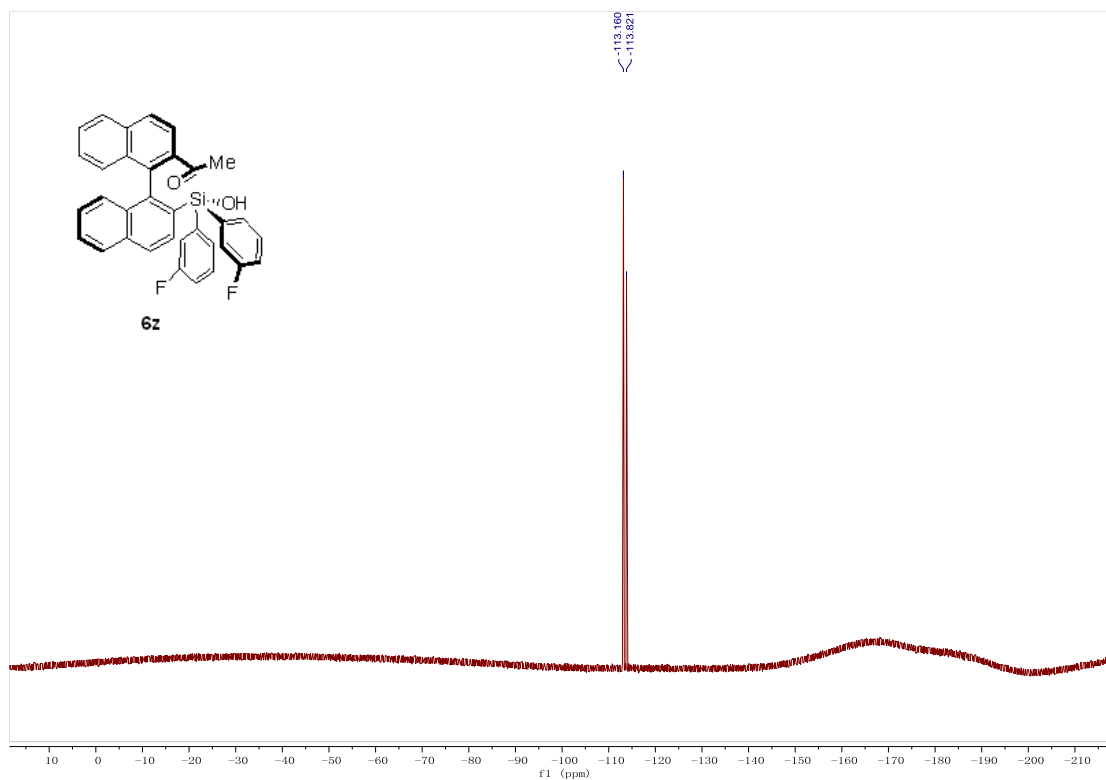

Supplementary Figure 111.  $^{19}\text{F}$  NMR spectroscopy of **6z**

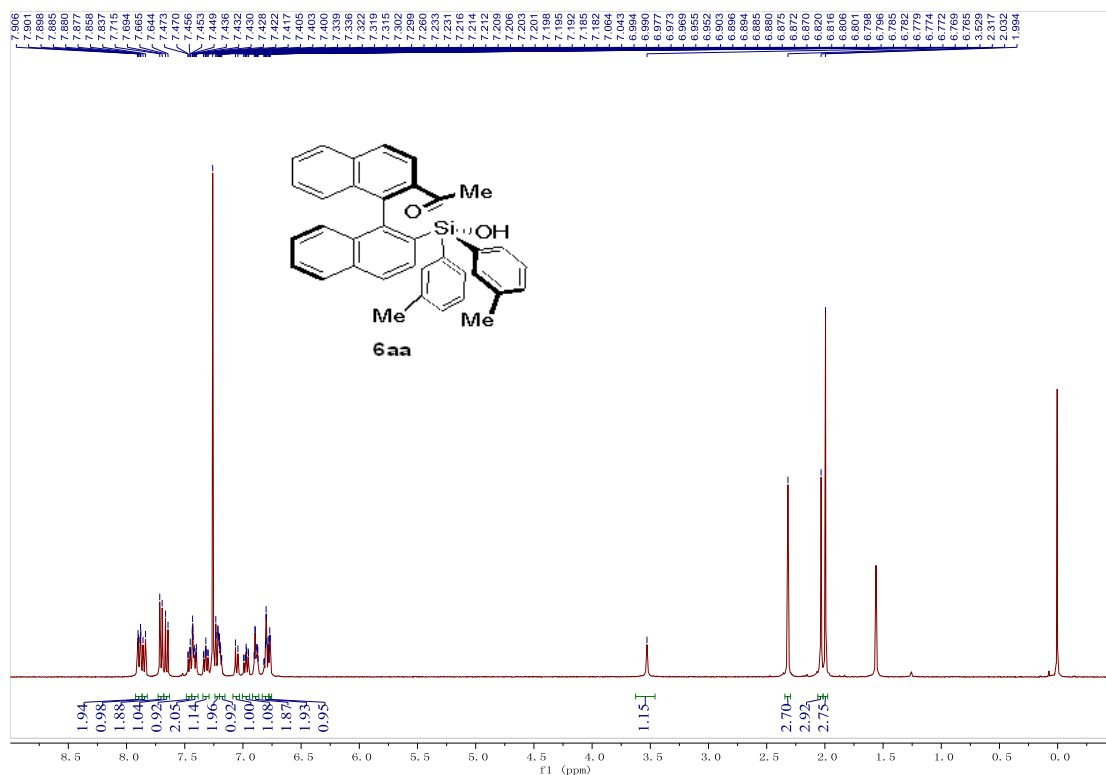

Supplementary Figure 112.  $^1\text{H}$  NMR spectroscopy of **6aa**

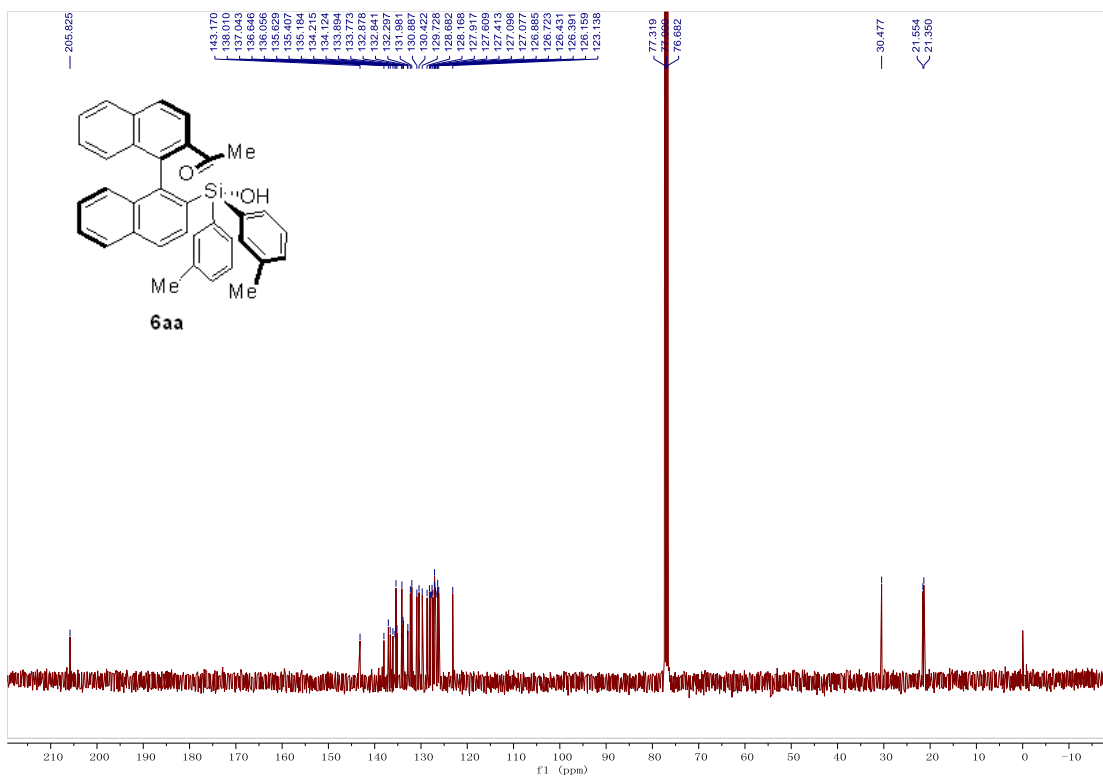

Supplementary Figure 113.  $^{13}\text{C}$  NMR spectroscopy of **6aa**

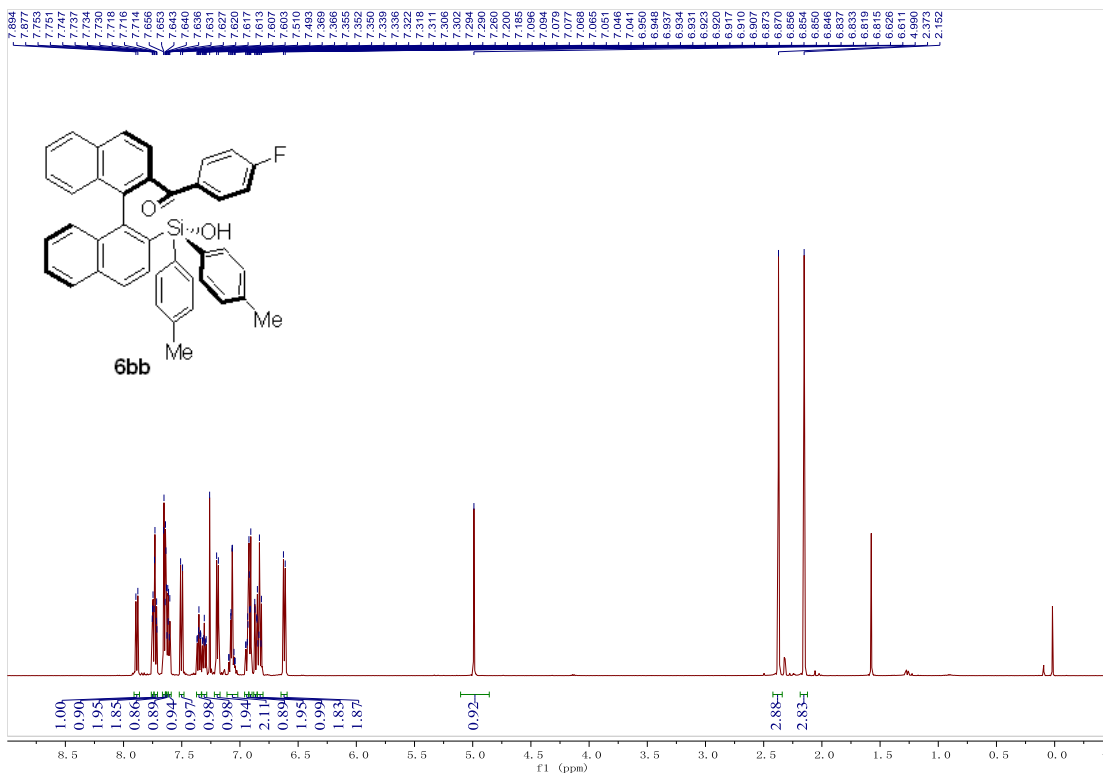

Supplementary Figure 114.  $^1\text{H}$  NMR spectroscopy of **6bb**



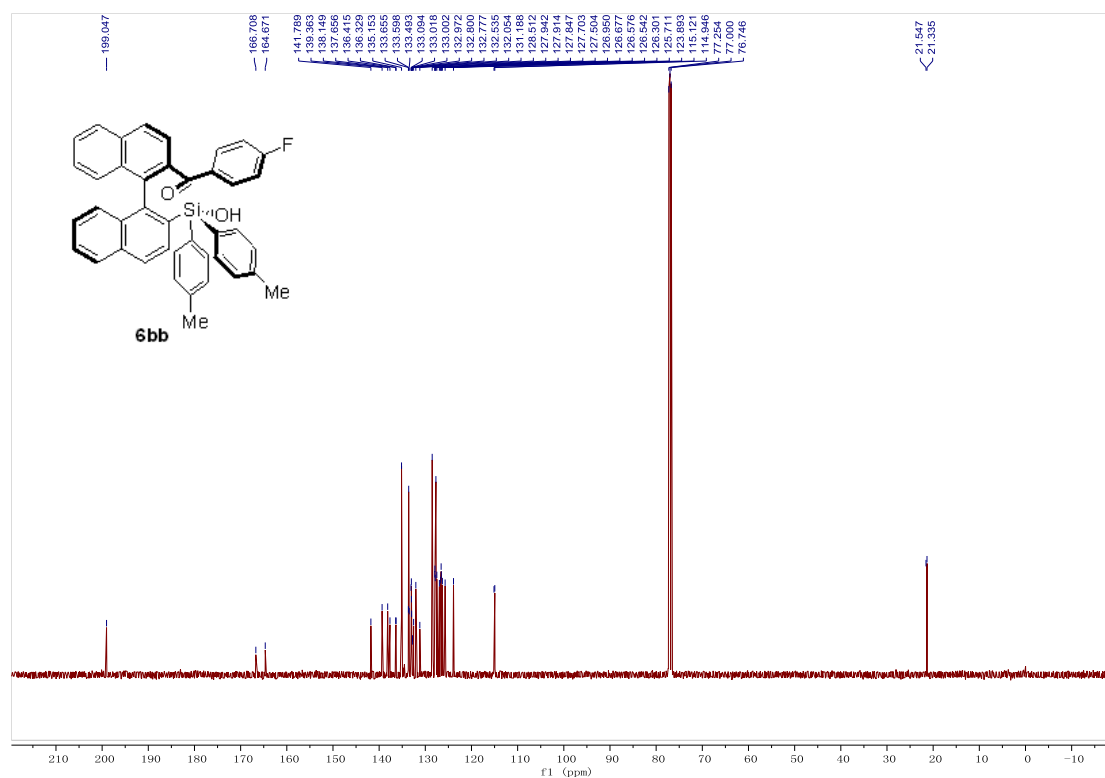

Supplementary Figure 115. <sup>13</sup>C NMR spectroscopy of **6bb**

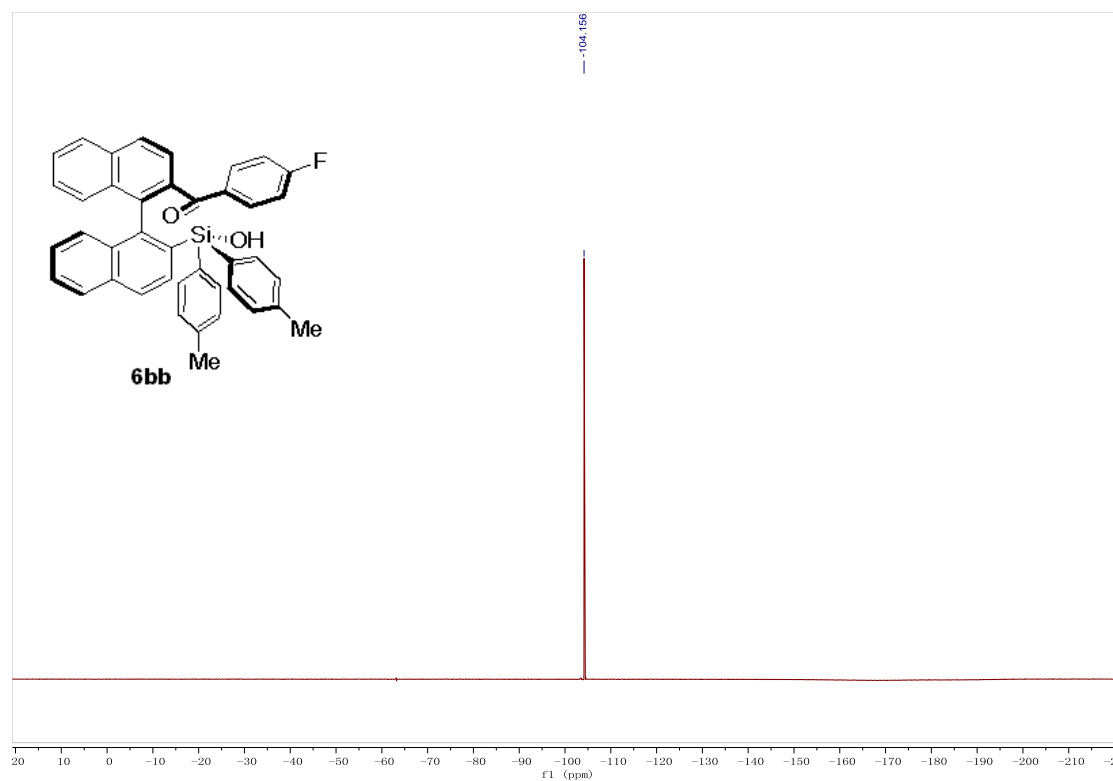

Supplementary Figure 116. <sup>19</sup>F NMR spectroscopy of **6bb**

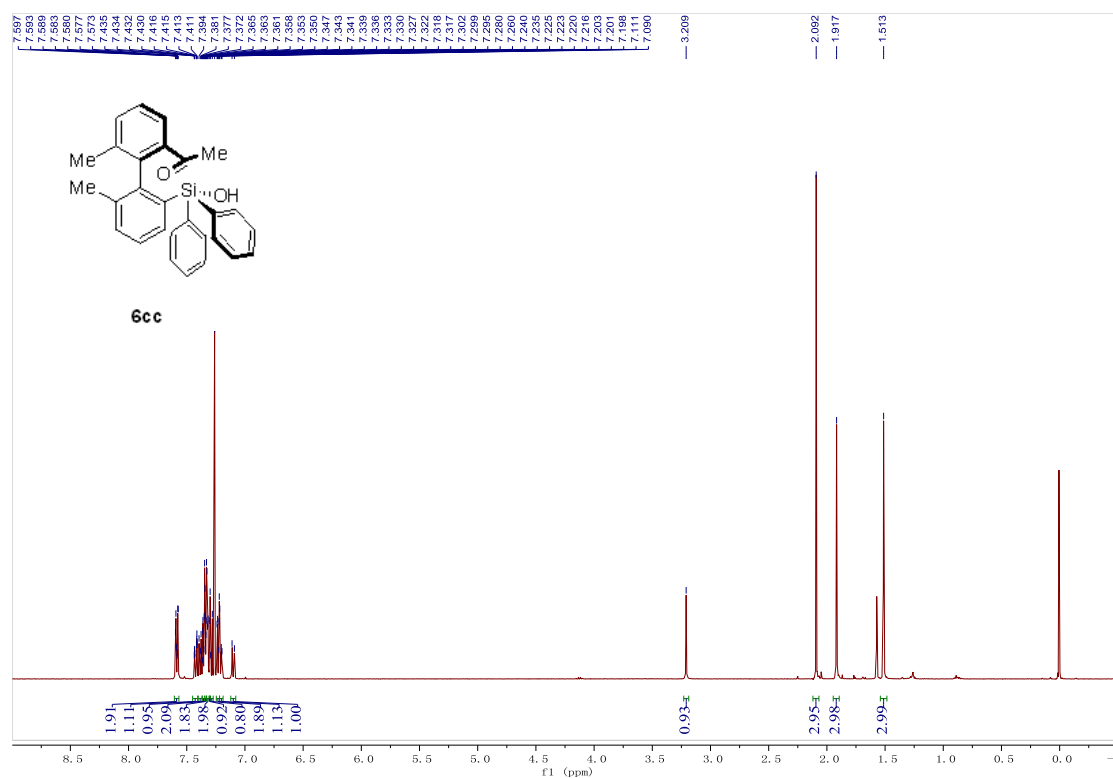

Supplementary Figure 117. <sup>1</sup>H NMR spectroscopy of **6cc**

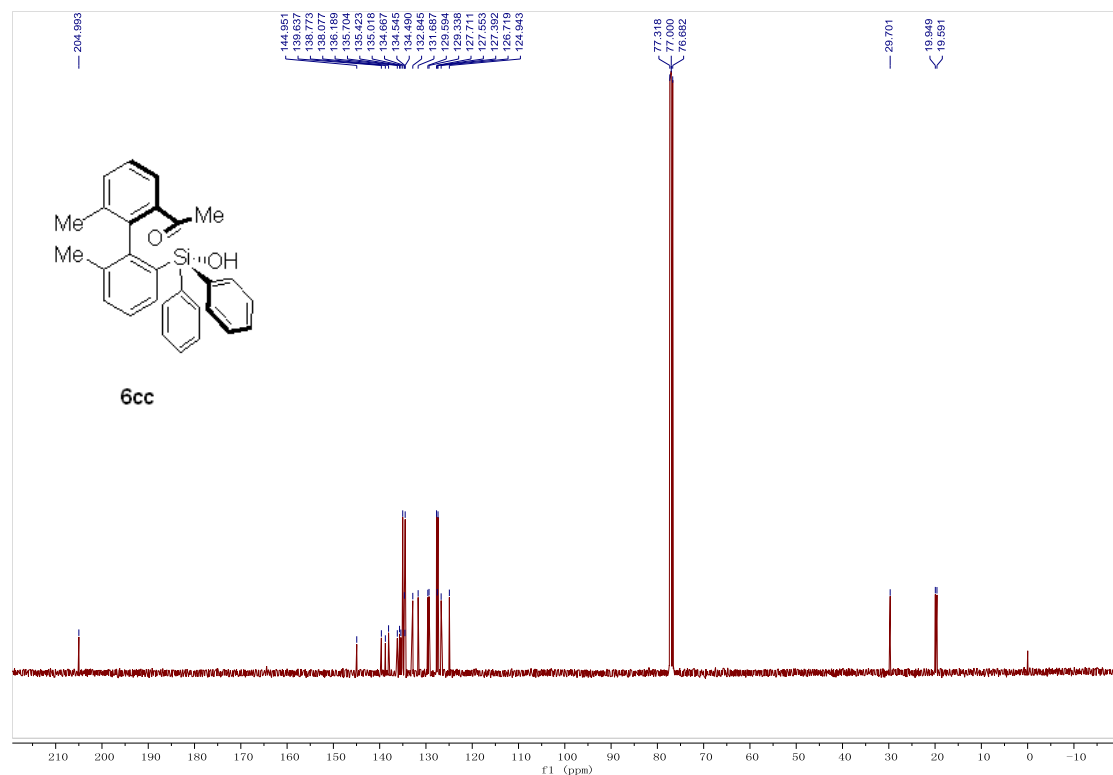

Supplementary Figure 118. <sup>13</sup>C NMR spectroscopy of **6cc**

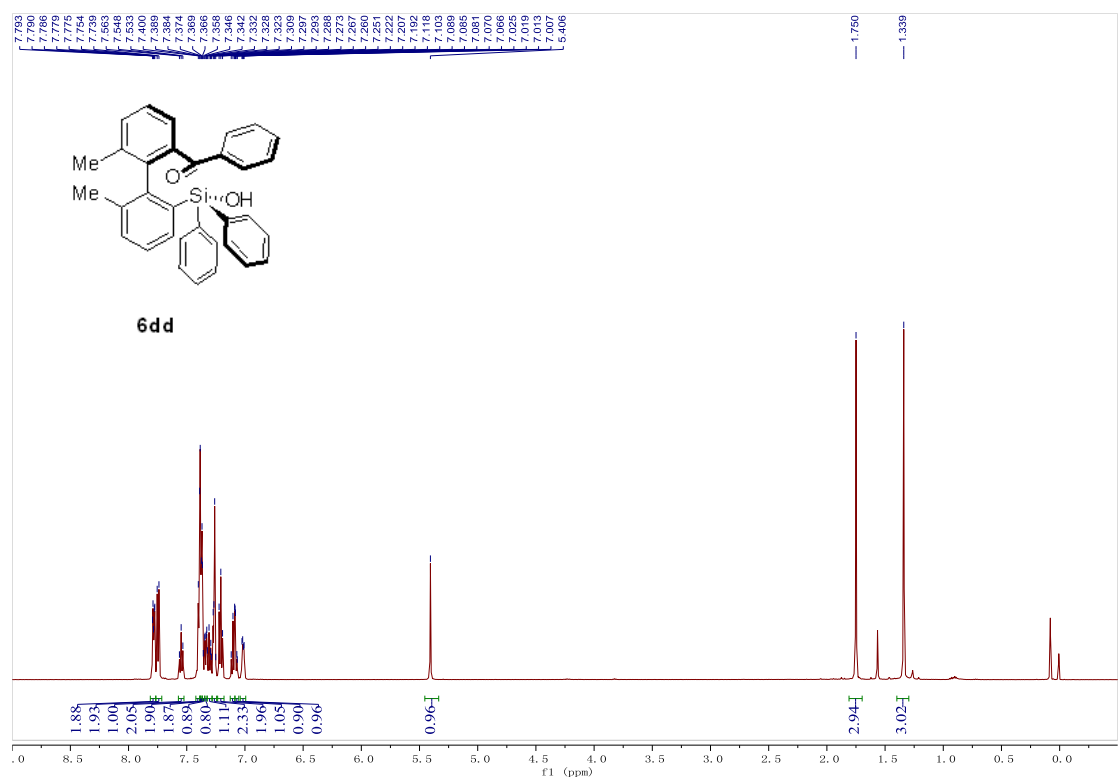

Supplementary Figure 119. <sup>1</sup>H NMR spectroscopy of **6dd**

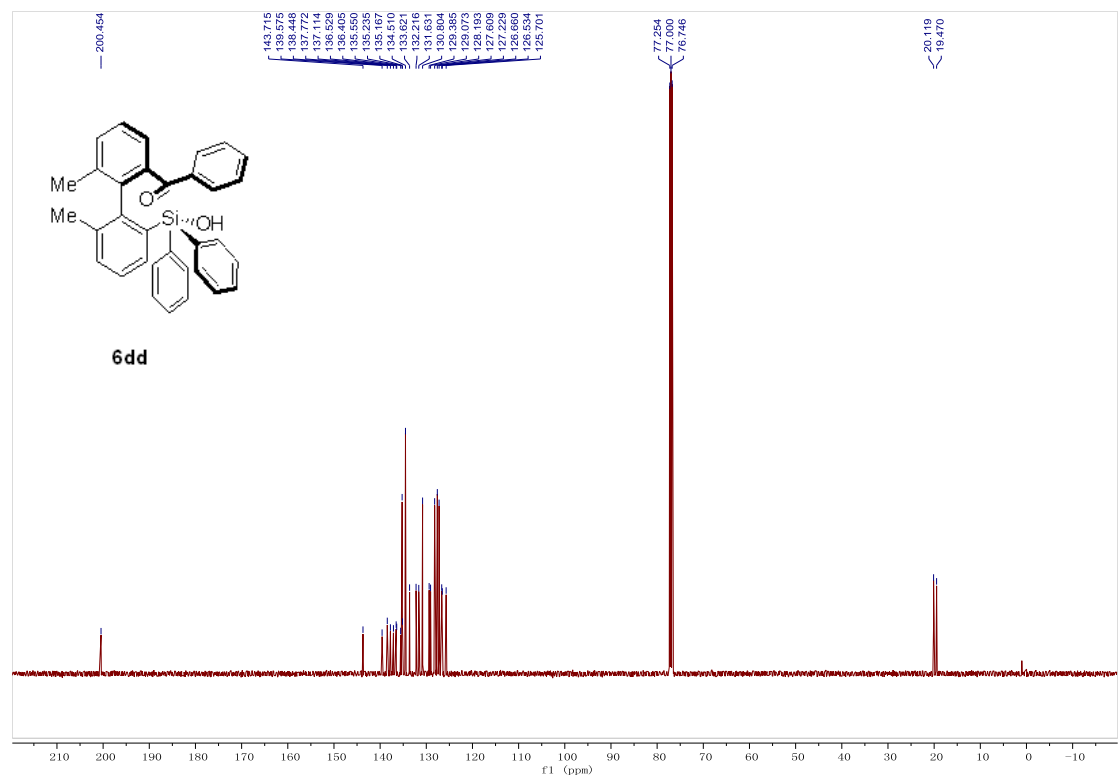

Supplementary Figure 120. <sup>13</sup>C NMR spectroscopy of **6dd**

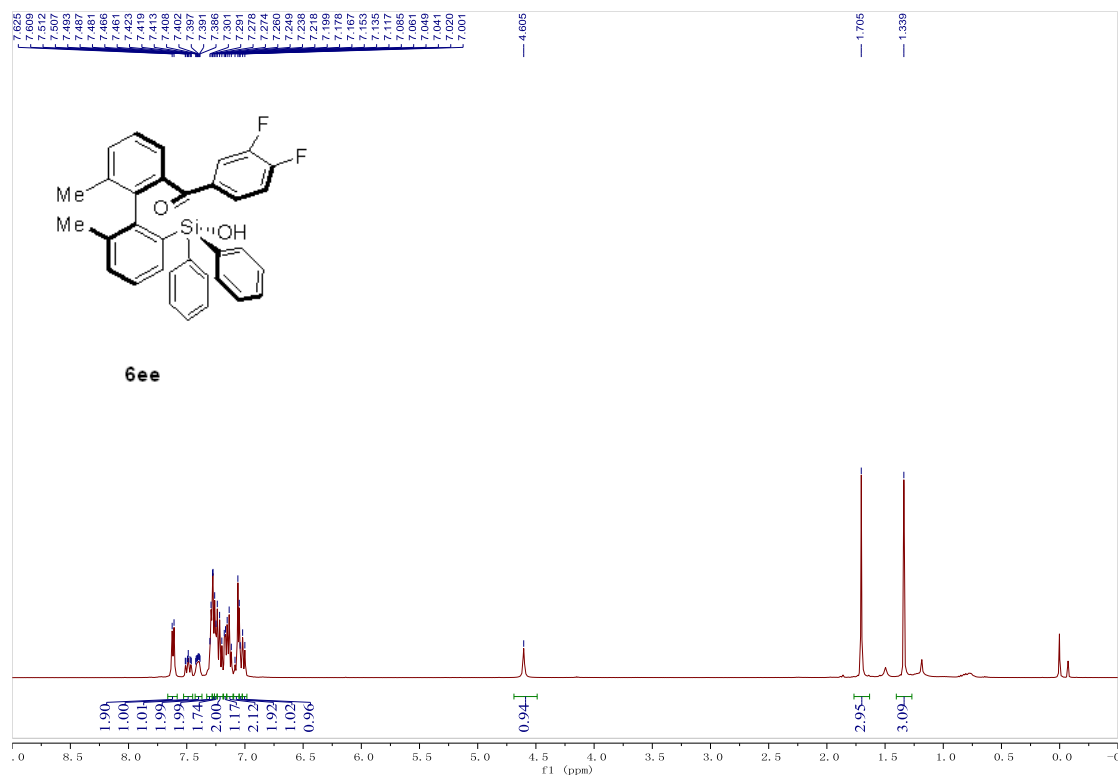

Supplementary Figure 121.  $^1\text{H}$  NMR spectroscopy of **6ee**

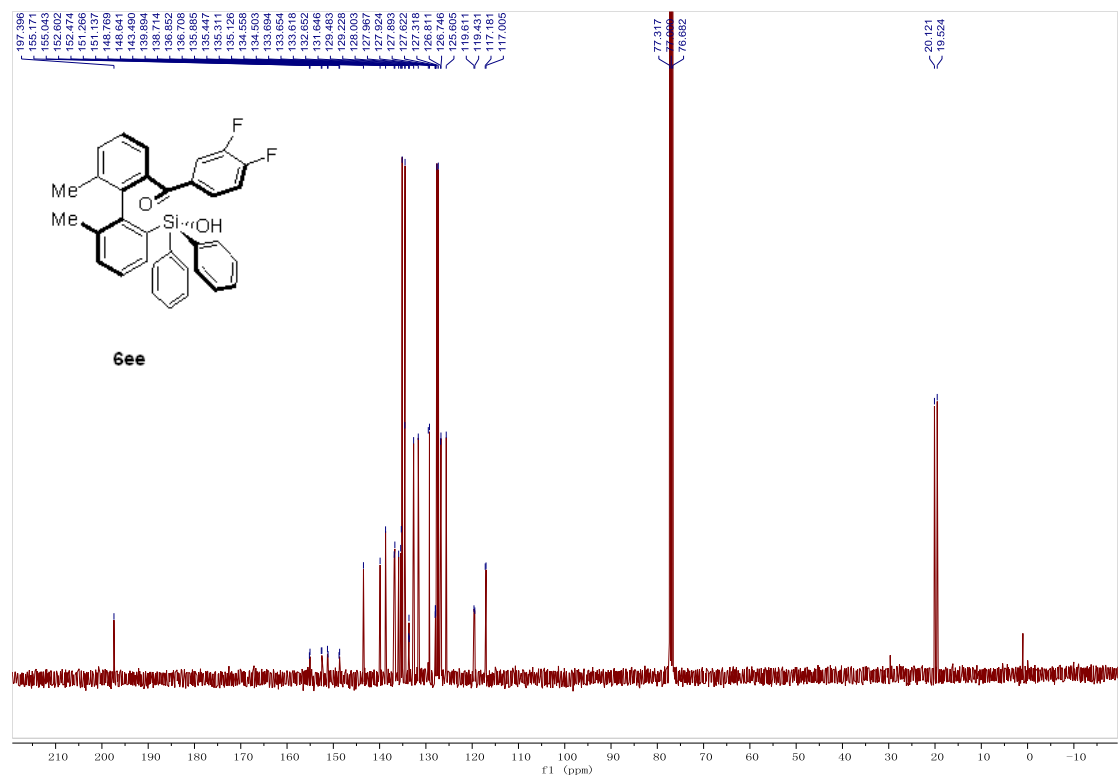

Supplementary Figure 122.  $^{13}\text{C}$  NMR spectroscopy of **6ee**

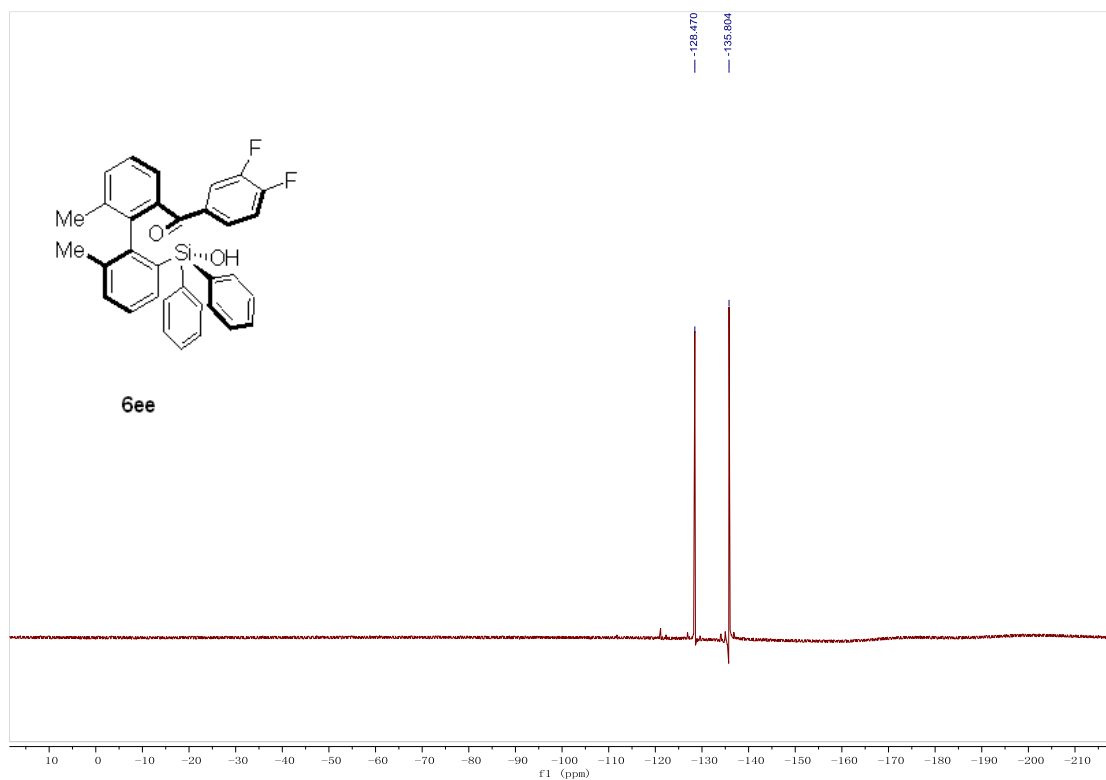

Supplementary Figure 123.  $^{19}\text{F}$  NMR spectroscopy of **6ee**

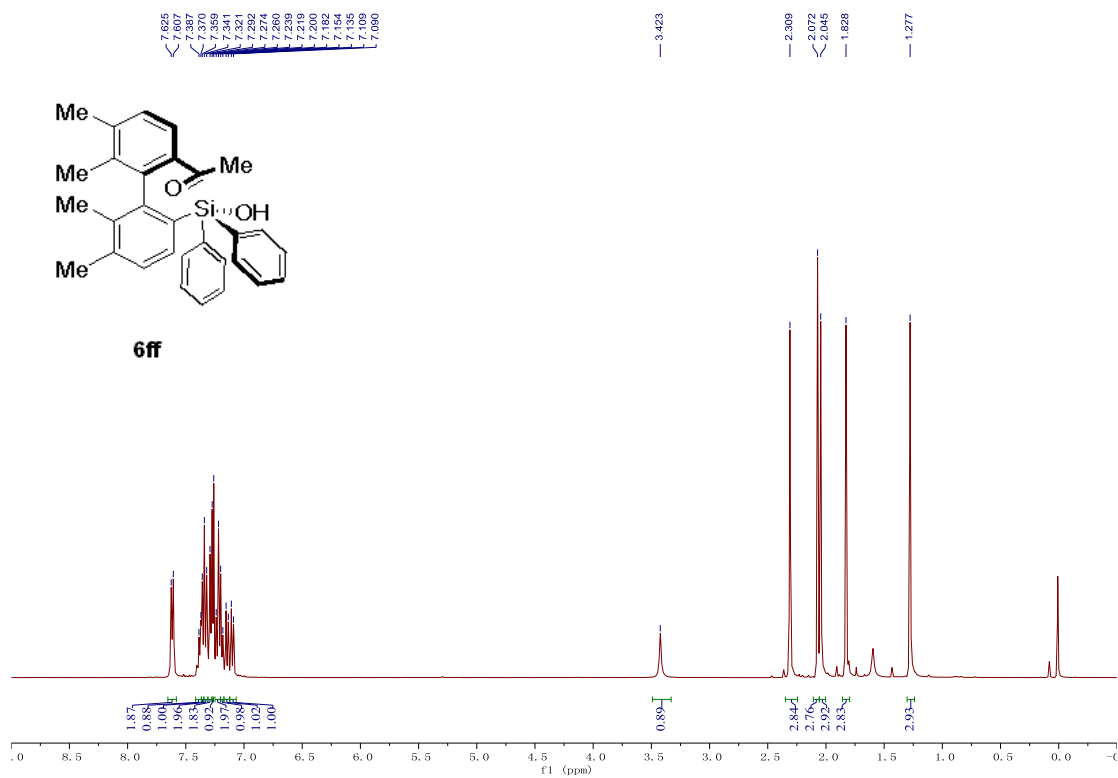

Supplementary Figure 124.  $^1\text{H}$  NMR spectroscopy of **6ff**

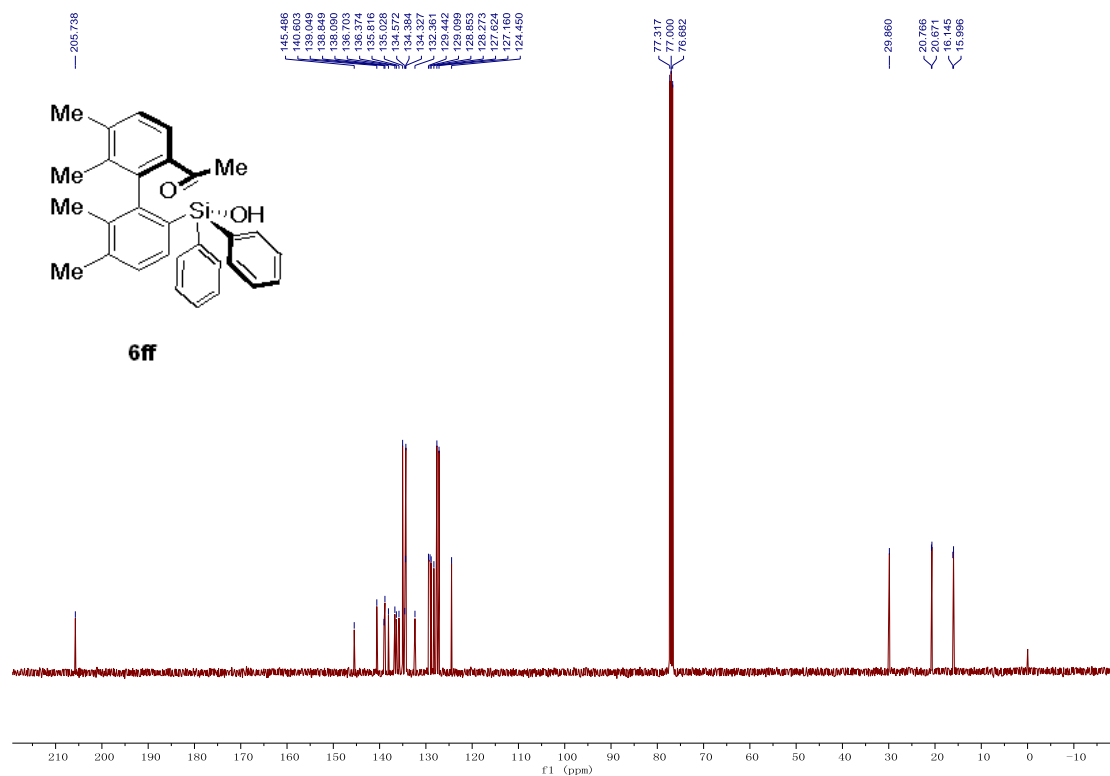

Supplementary Figure 125.  $^{13}\text{C}$  NMR spectroscopy of **6ff**

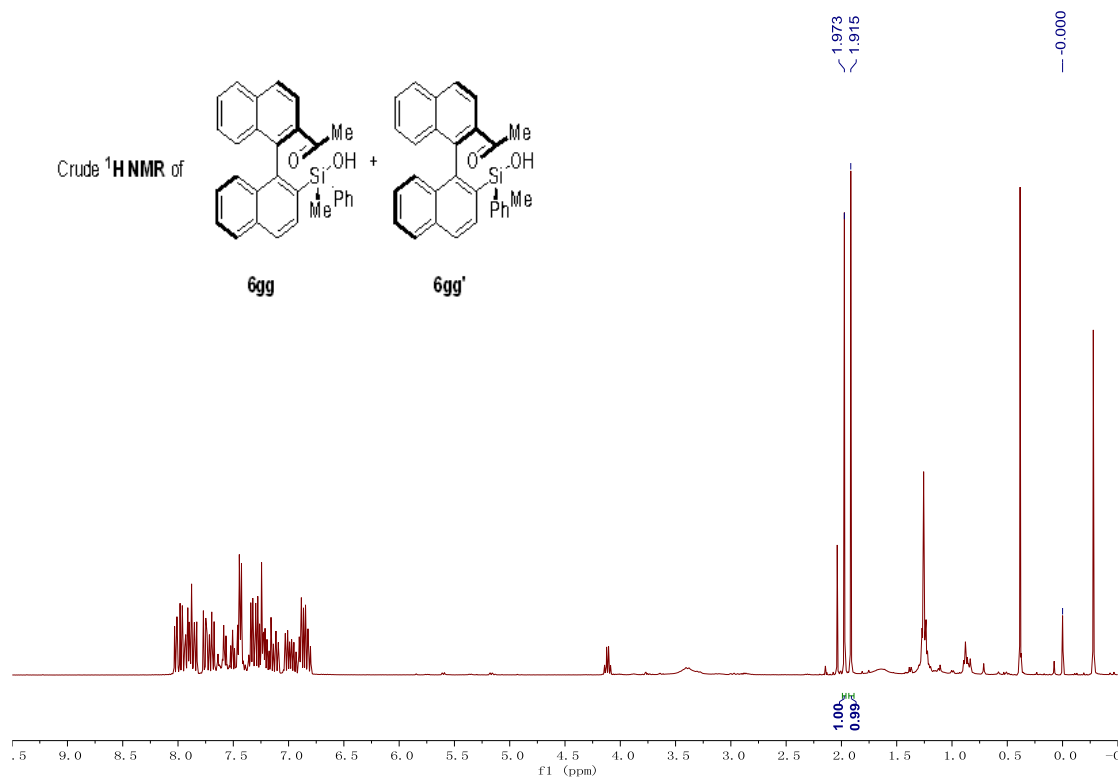

Supplementary Figure 126. Crude  $^1\text{H}$  NMR spectroscopy of **6gg** and **6gg'**



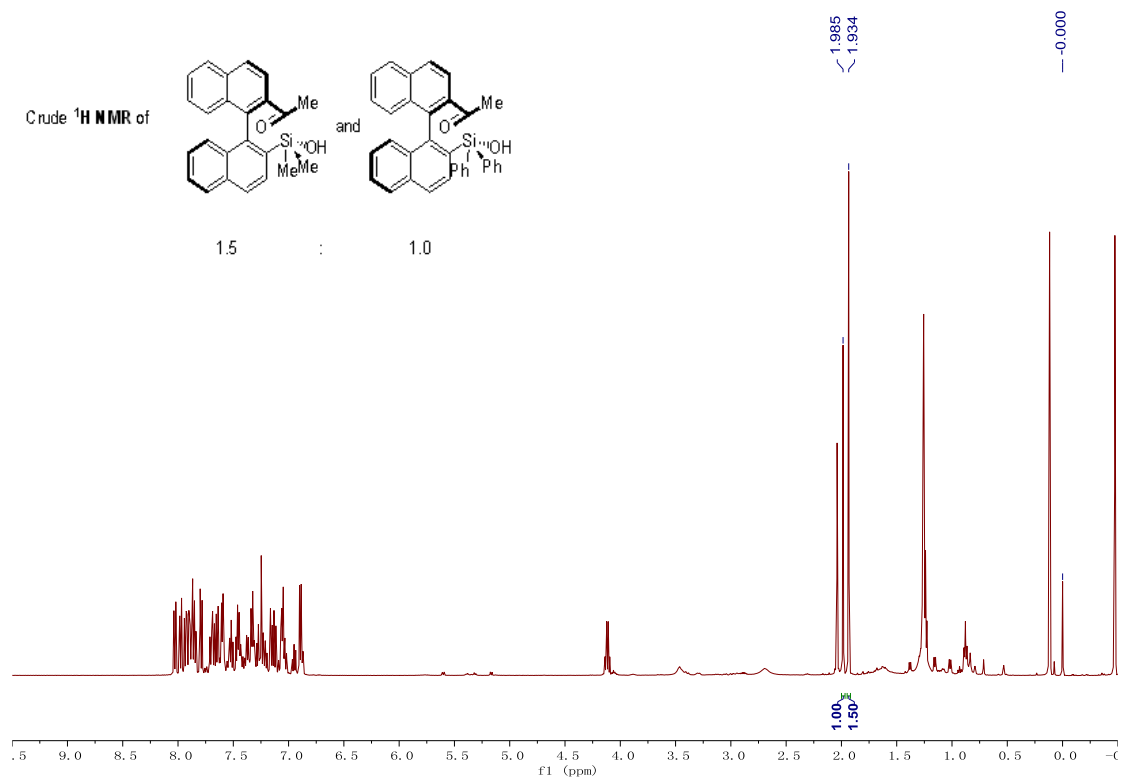

Supplementary Figure 129. Crude  $^1\text{H}$  NMR spectroscopy of **6a** and **6c**

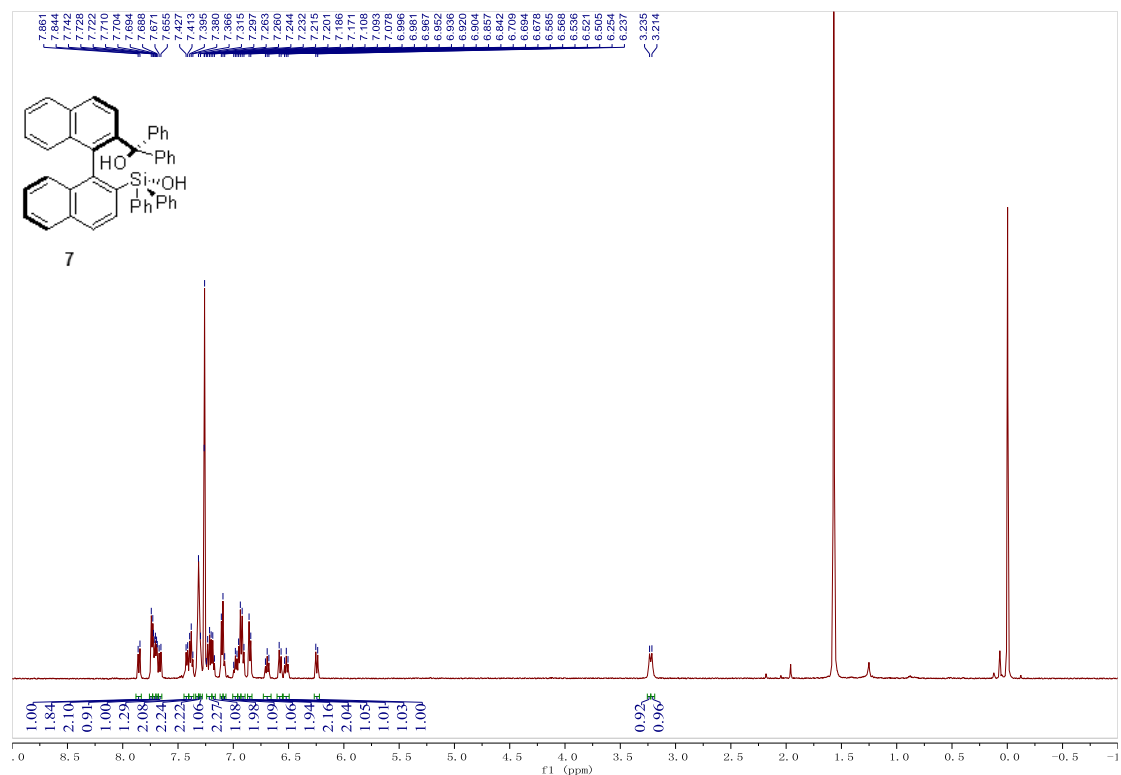

Supplementary Figure 130.  $^1\text{H}$  NMR spectroscopy of **7**



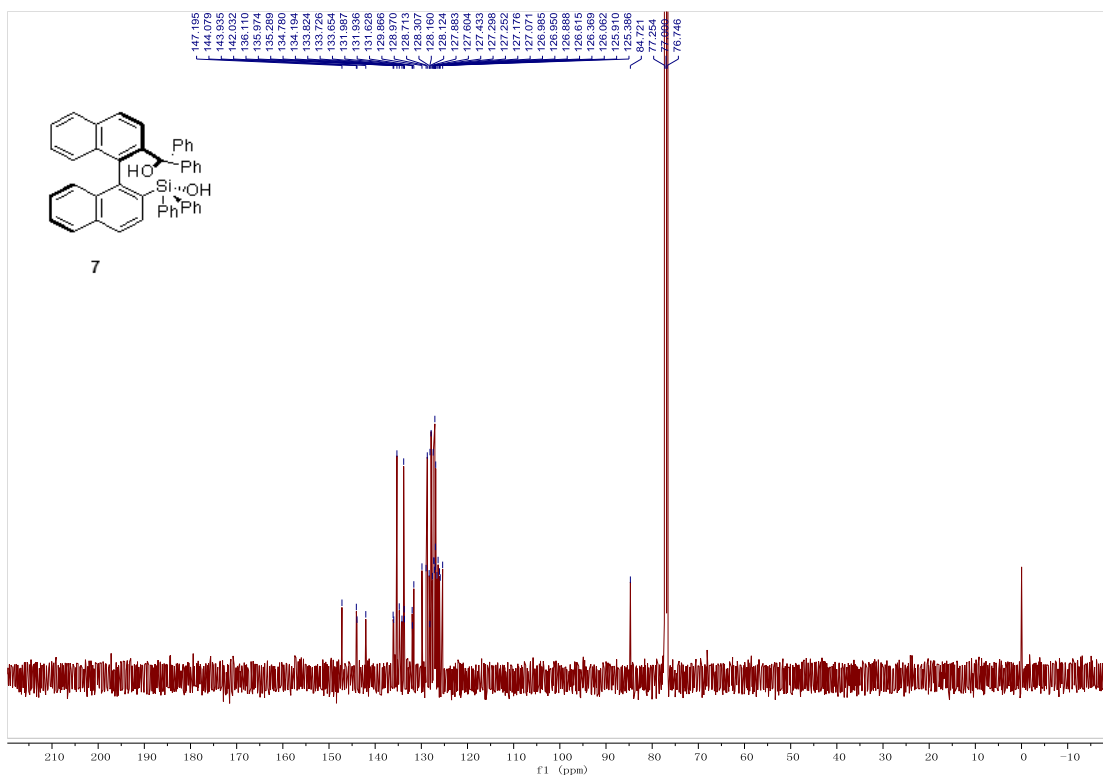

Supplementary Figure 131. <sup>13</sup>C NMR spectroscopy of 7

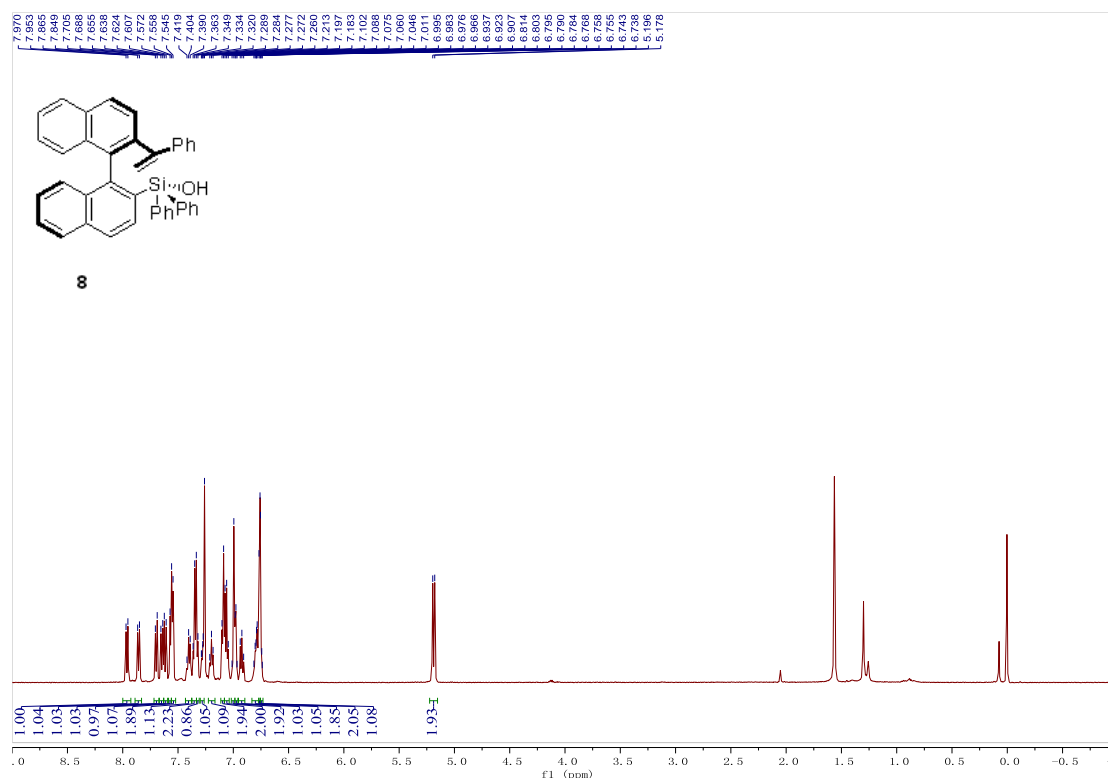

Supplementary Figure 132. <sup>1</sup>H NMR spectroscopy of 8

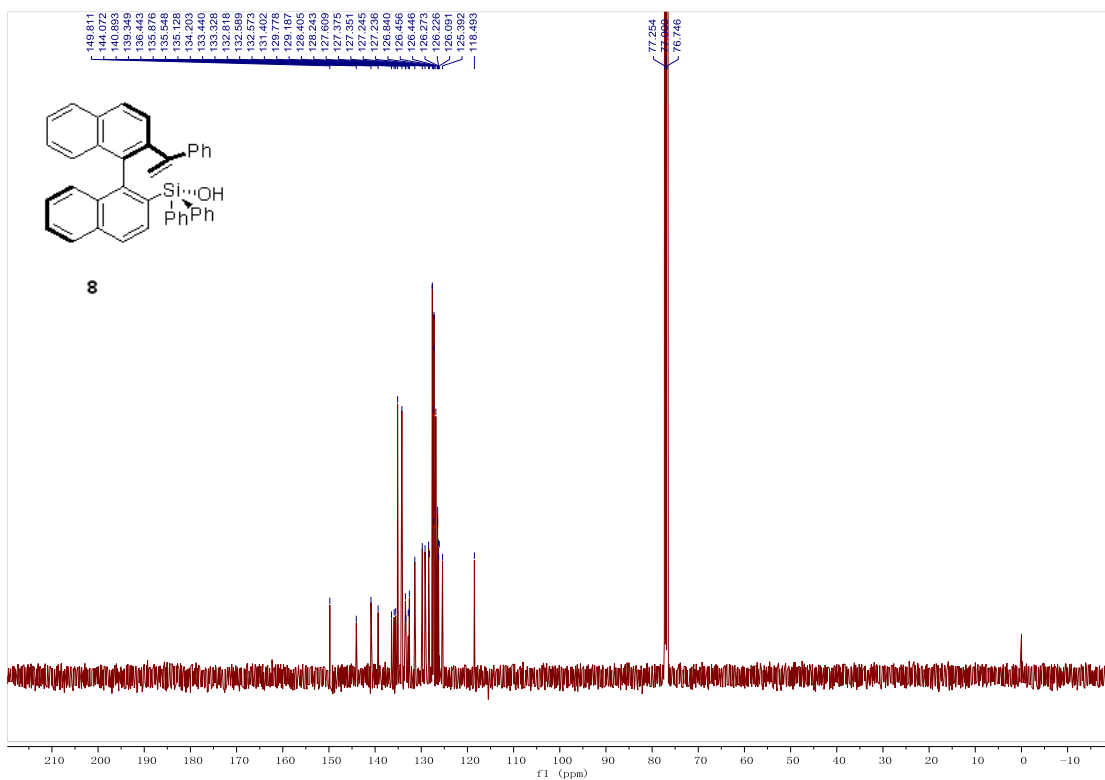

Supplementary Figure 133. <sup>13</sup>C NMR spectroscopy of **8**

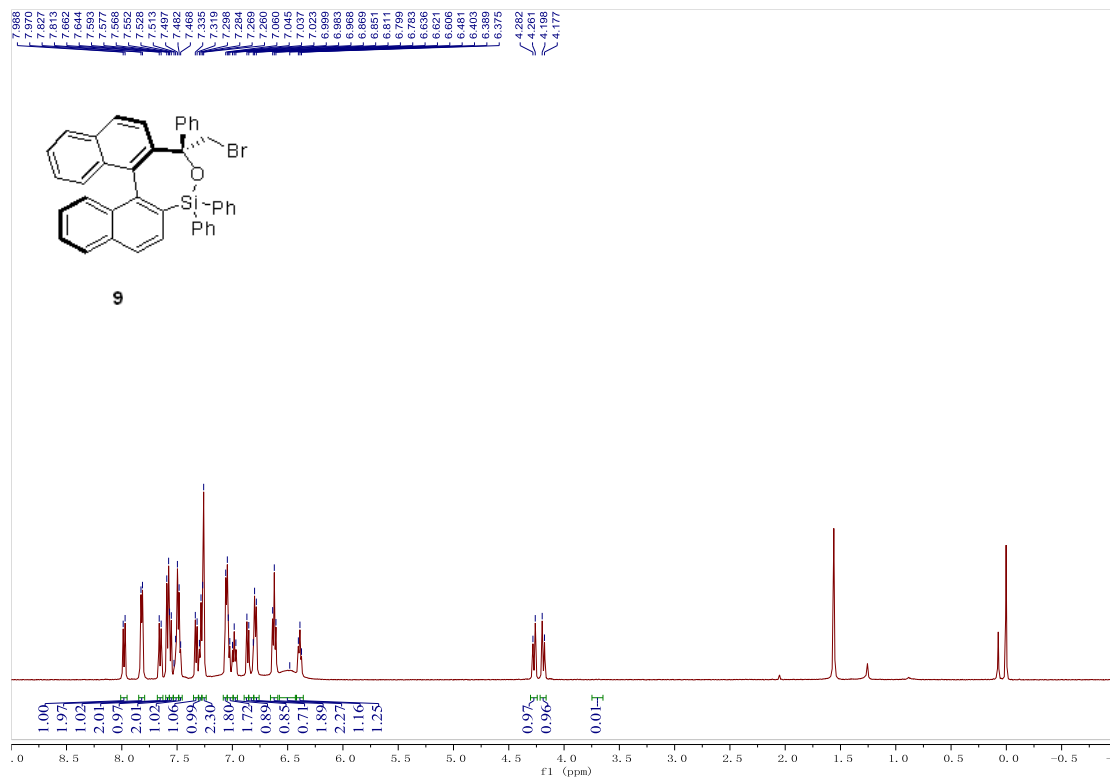

Supplementary Figure 134. <sup>1</sup>H NMR spectroscopy of **9**

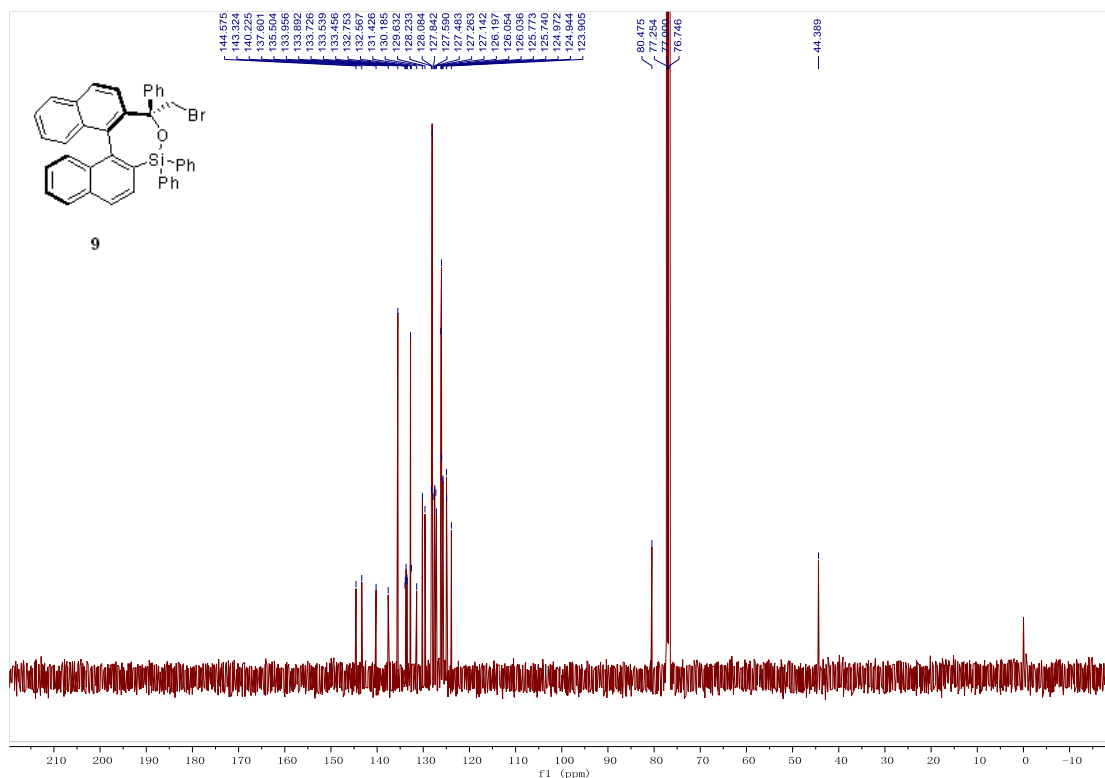

Supplementary Figure 135. <sup>13</sup>C NMR spectroscopy of 9

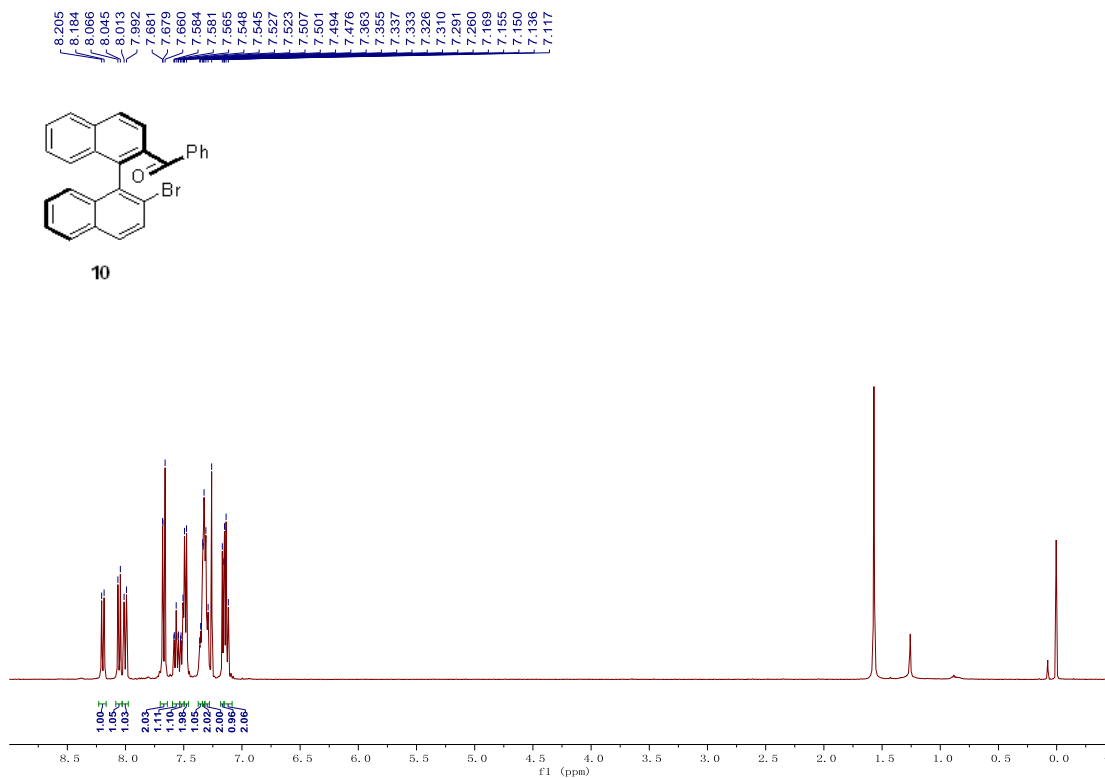

Supplementary Figure 136. <sup>1</sup>H NMR spectroscopy of 10

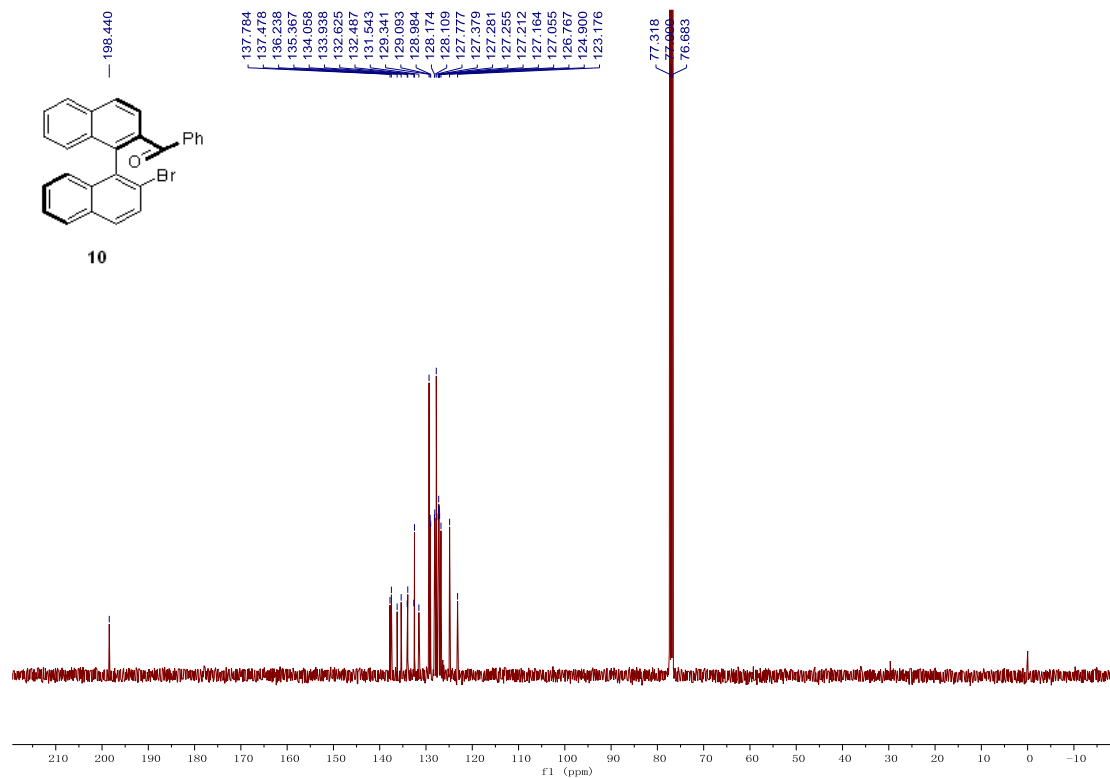

Supplementary Figure 137. <sup>13</sup>C NMR spectroscopy of **10**

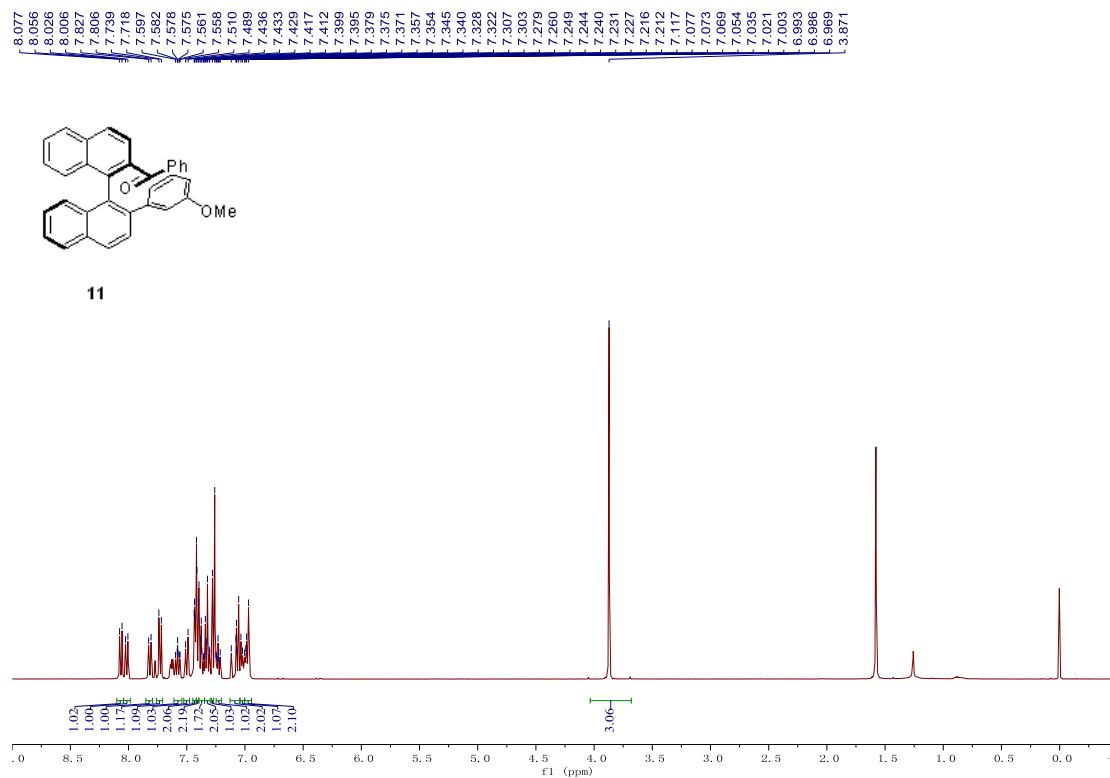

Supplementary Figure 138. <sup>1</sup>H NMR spectroscopy of **11**

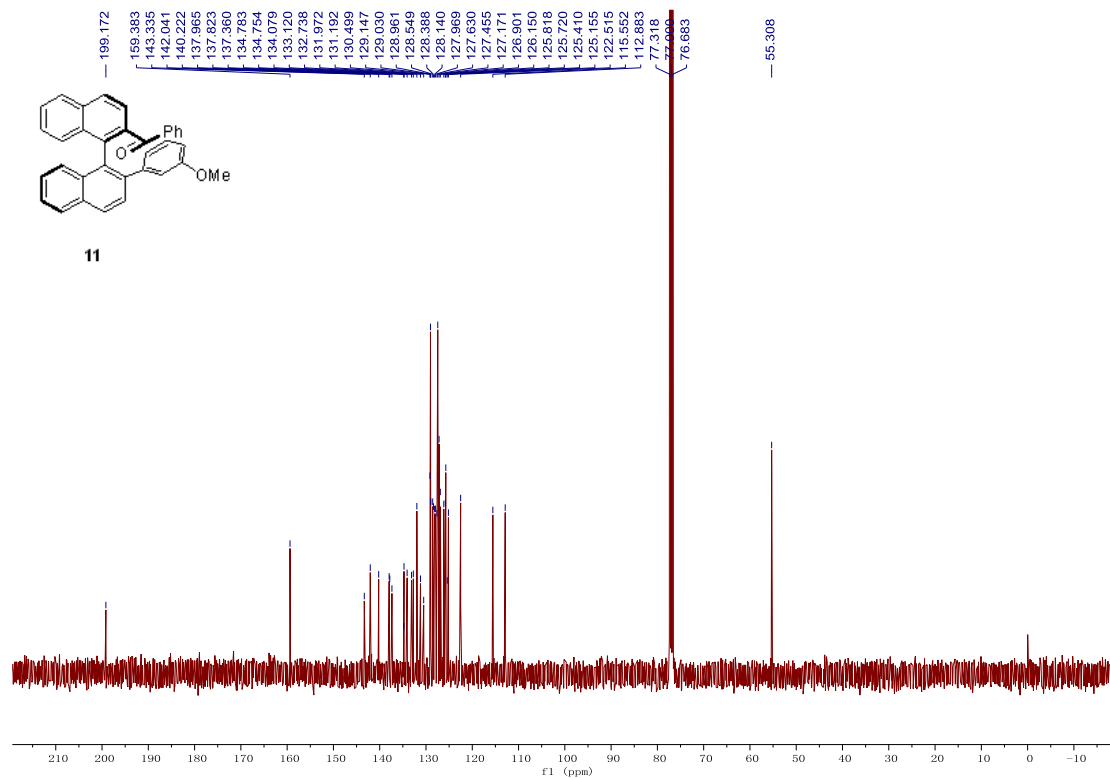

Supplementary Figure 139.  $^{13}\text{C}$  NMR spectroscopy of **11**

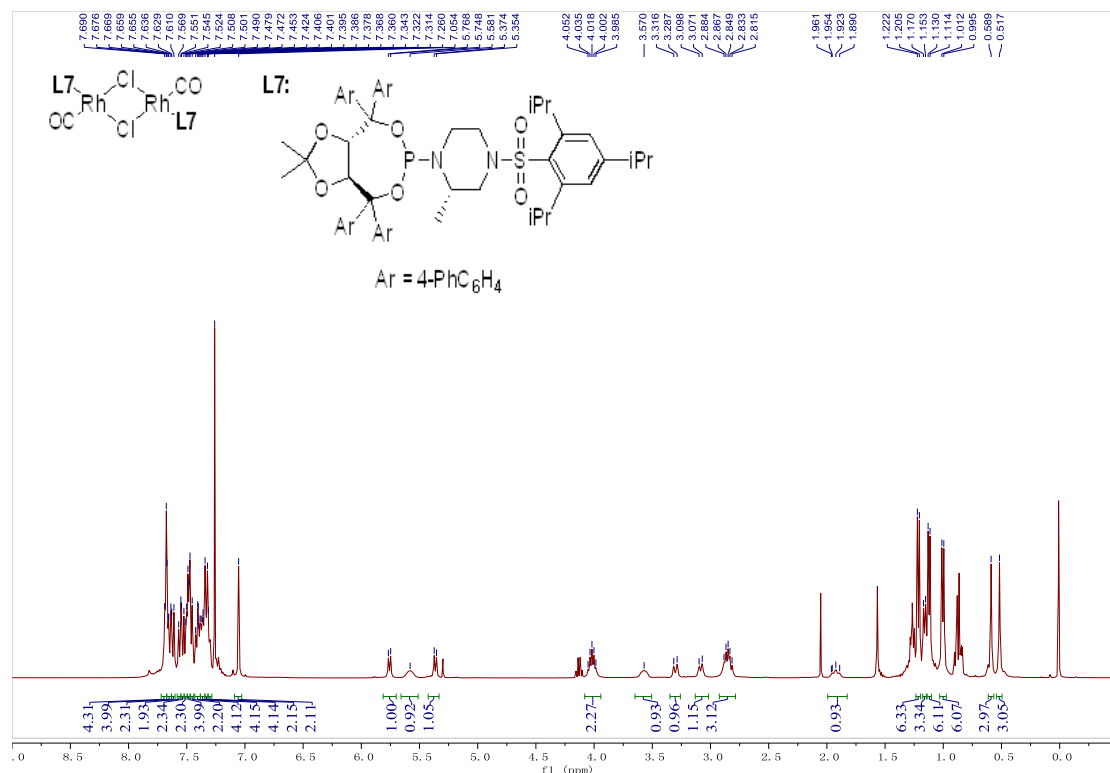

Supplementary Figure 140.  $^1\text{H}$  NMR spectroscopy of **Rh-1**

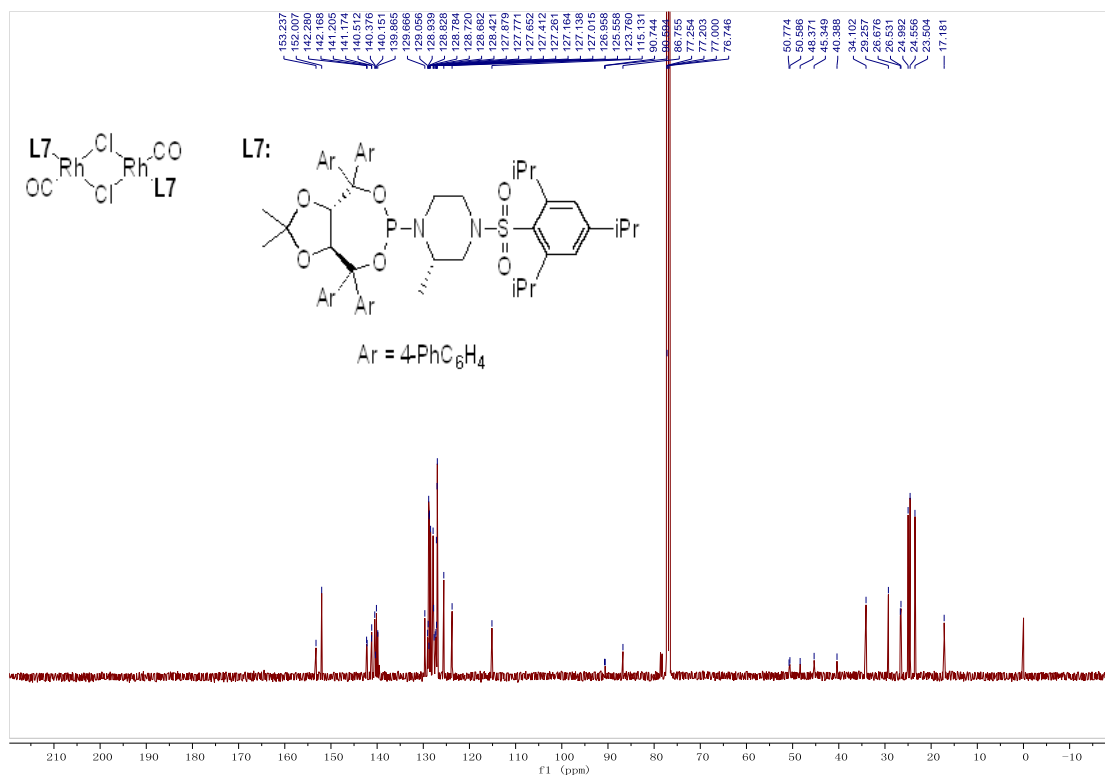

Supplementary Figure 141. <sup>13</sup>C NMR spectroscopy of Rh-1

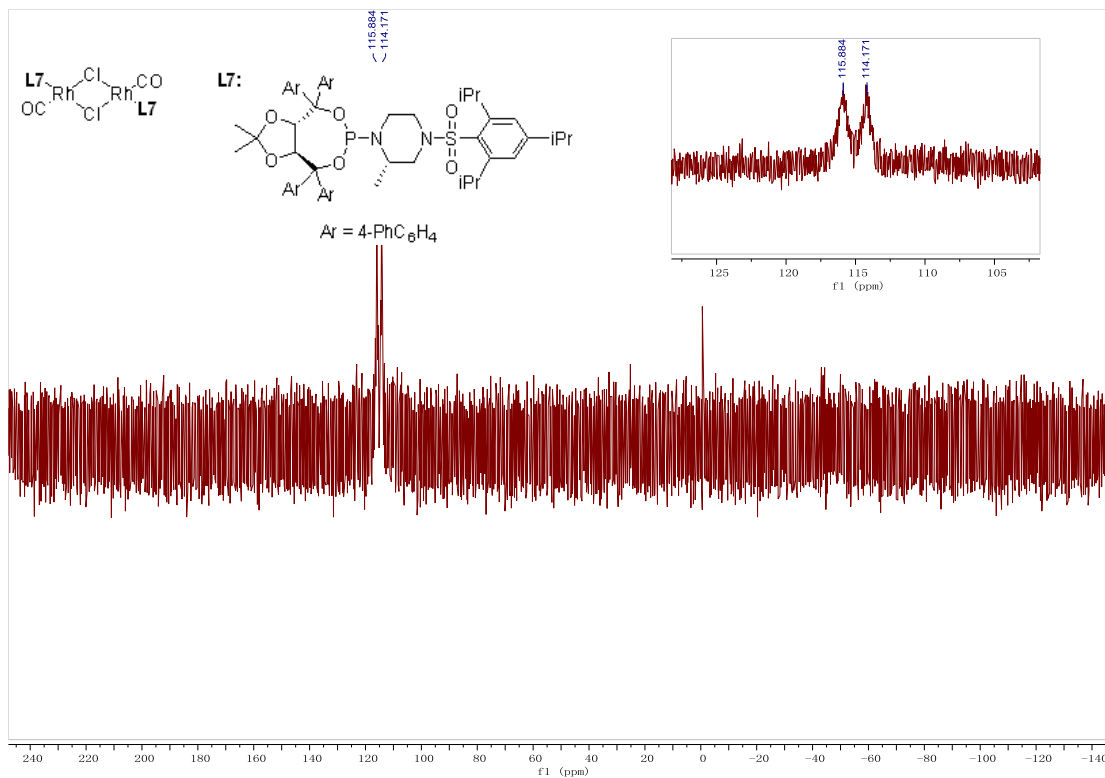

Supplementary Figure 142. <sup>31</sup>P NMR spectroscopy of Rh-1

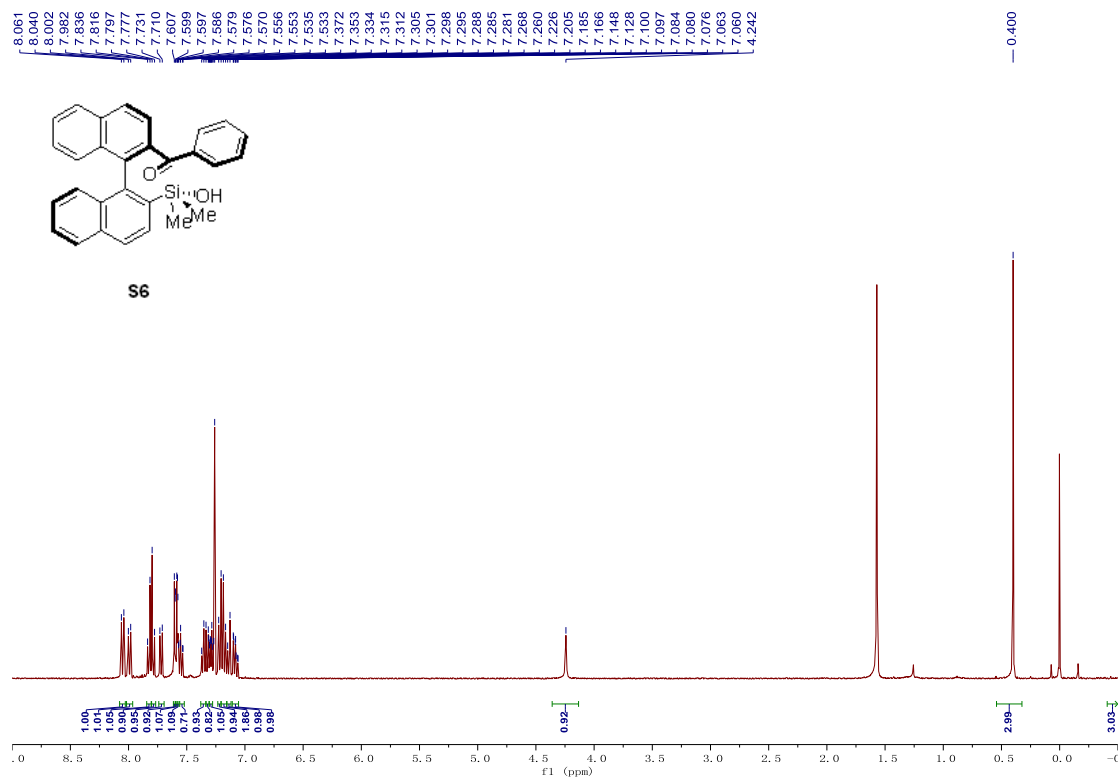

Supplementary Figure 143. <sup>1</sup>H NMR spectroscopy of S6

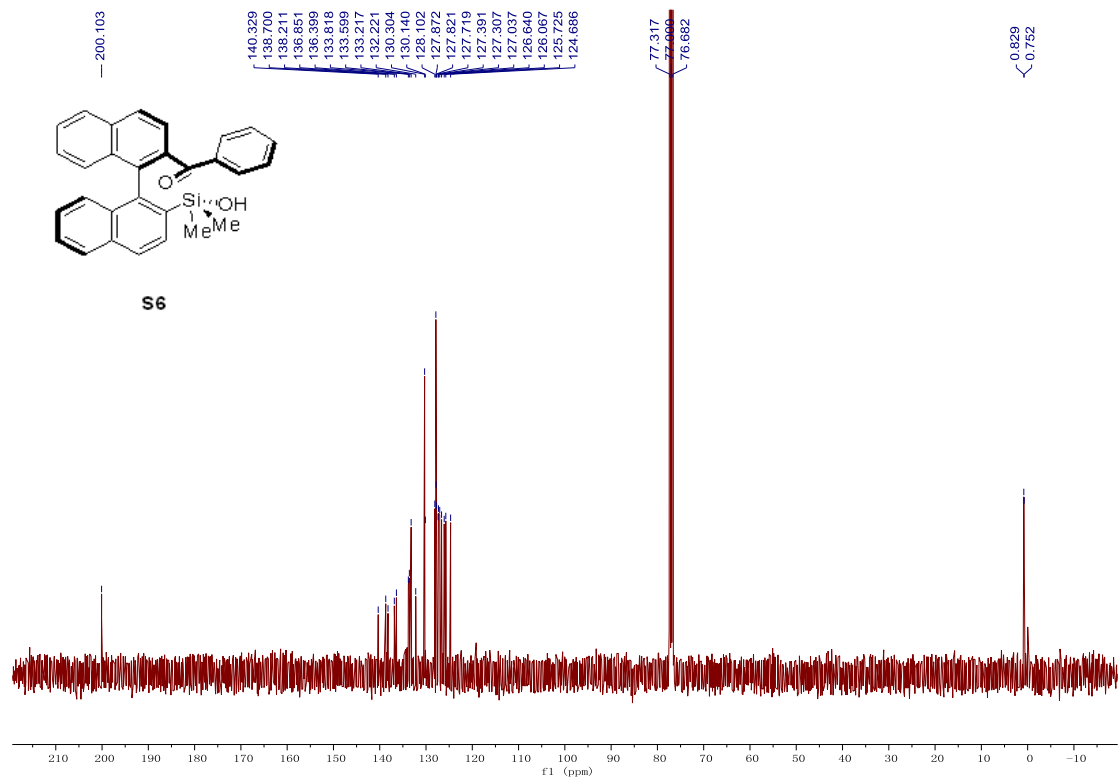

Supplementary Figure 144. <sup>13</sup>C NMR spectroscopy of S6

## Copies of HPLC traces

Data File F:\DATA\JFENG\DATA\BXF-2-34-rac(AD-H,10%,1.0).D  
Sample Name: BXF-2-34-rac(AD-H,10%,1.0)

```
=====
Acq. Operator   :
Sample Operator :
Acq. Instrument : LC1260                      Location : 1
Injection Date  : 09/09/2019 21:20:27        Inj Volume : No inj
Acq. Method     : C:\Chem32\1\Methods\DEF_LC.M
Last changed    : 09/09/2019 21:09:32 by
                  (modified after loading)
Analysis Method : F\METHOD\ZK.M
Last changed    : 14/07/2019 15:34:15 by
Additional Info  : Peak(s) manually integrated
=====
```

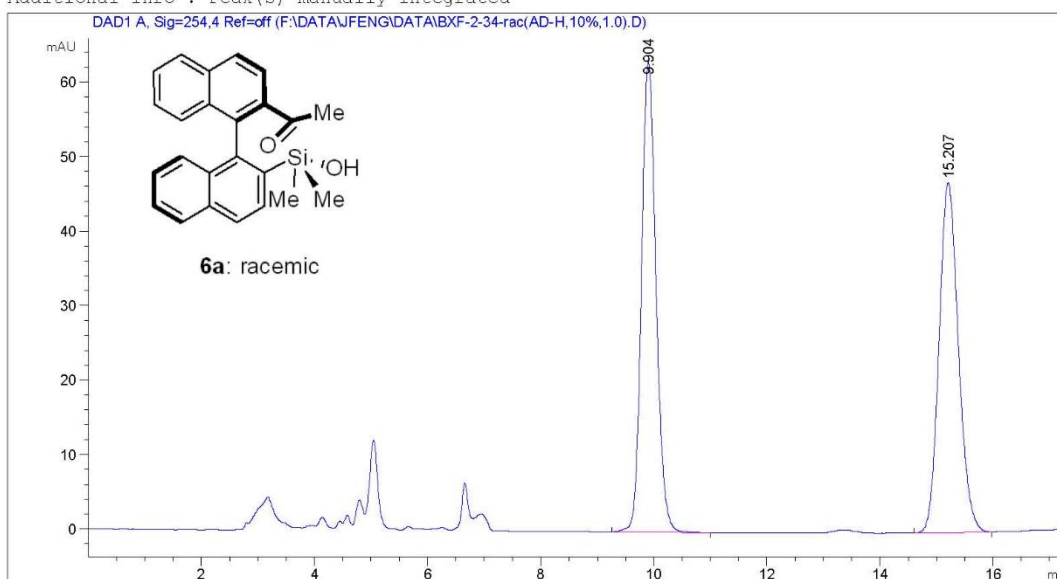

### Area Percent Report

```
Sorted By      : Signal
Multiplier     : 1.0000
Dilution       : 1.0000
Use Multiplier & Dilution Factor with ISTDs
```

Signal 1: DAD1 A, Sig=254,4 Ref=off

| Peak # | RetTime [min] | Type | Width [min] | Area [mAU*s] | Height [mAU] | Area %  |
|--------|---------------|------|-------------|--------------|--------------|---------|
| 1      | 9.904         | BB   | 0.2761      | 1127.30164   | 63.20520     | 50.3058 |
| 2      | 15.207        | BB   | 0.3646      | 1113.59607   | 46.97394     | 49.6942 |

Totals : 2240.89771 110.17914

## Supplementary Figure 145. HPLC data of 6a



=====  
Acq. Operator :  
Sample Operator :  
Acq. Instrument : LC1260 Location : 1  
Injection Date : 16/09/2019 21:12:50 Inj Volume : No inj  
Acq. Method : C:\Chem32\1\Methods\DEF\_LC.M  
Last changed : 16/09/2019 21:11:18 by  
(modified after loading)  
Analysis Method : F:\METHOD\ZK.M  
Last changed : 14/07/2019 15:34:15 by  
Additional Info : Peak(s) manually integrated

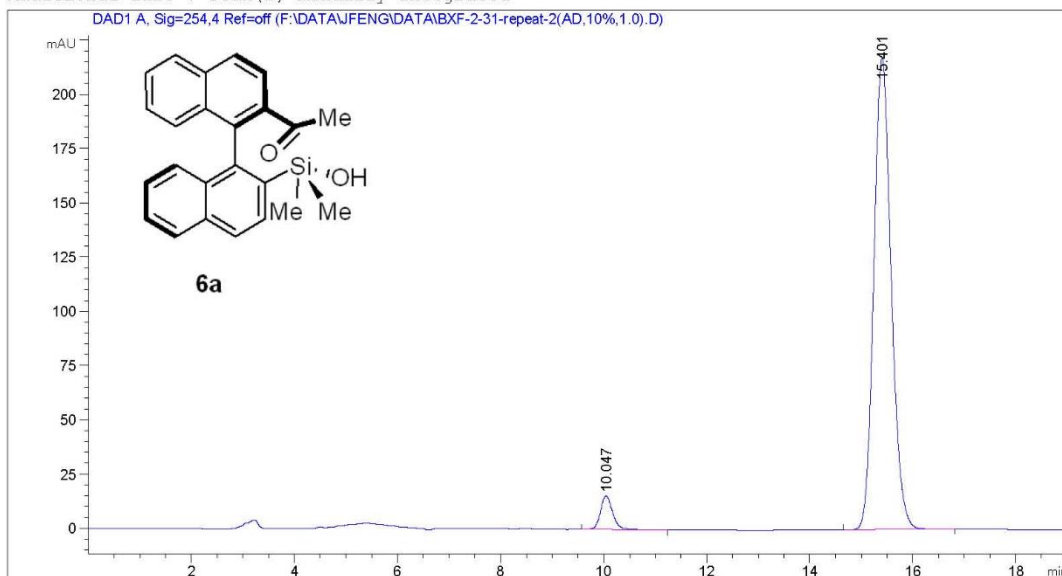

=====  
Area Percent Report  
=====

Sorted By : Signal  
Multiplier : 1.0000  
Dilution : 1.0000  
Use Multiplier & Dilution Factor with ISTDs

Signal 1: DAD1 A, Sig=254,4 Ref=off

| Peak # | RetTime [min] | Type | Width [min] | Area [mAU*s] | Height [mAU] | Area %  |
|--------|---------------|------|-------------|--------------|--------------|---------|
| 1      | 10.047        | BB   | 0.2489      | 254.15904    | 15.53496     | 4.7712  |
| 2      | 15.401        | BB   | 0.3628      | 5072.73682   | 216.96078    | 95.2288 |

Totals : 5326.89586 232.49575

**Supplementary Figure 146. HPLC data of 6a**

Data File F:\DATA\JFENG\DATA\LN-1-3(AD,20%,1.0).D  
Sample Name: LN-1-3(AD,20%,1.0)

```
=====
Acq. Operator   :
Sample Operator :
Acq. Instrument : LC1260                      Location : 1
Injection Date  : 11/09/2019 09:56:26        Inj Volume : Manually

Acq. Method    : F:\METHOD\JFeng.M
Last changed   : 11/09/2019 09:48:46 by
                (modified after loading)
Analysis Method: F:\METHOD\ZK.M
Last changed   : 14/07/2019 15:34:15 by
Additional Info : Peak(s) manually integrated
=====
```

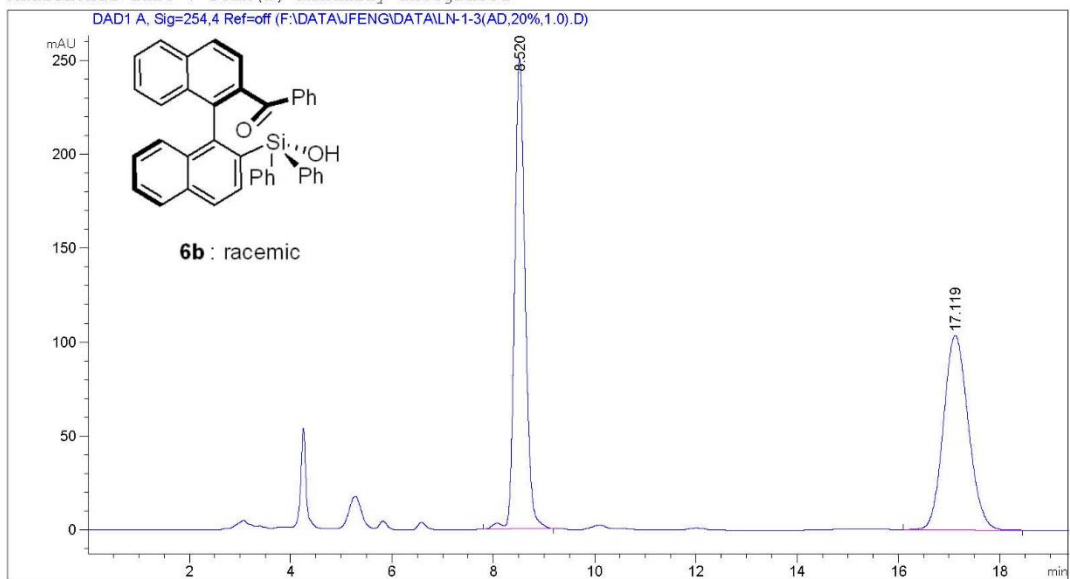

=====  
Area Percent Report  
=====

Sorted By : Signal  
Multiplier : 1.0000  
Dilution : 1.0000  
Use Multiplier & Dilution Factor with ISTDs

Signal 1: DAD1 A, Sig=254,4 Ref=off

| Peak # | RetTime [min] | Type | Width [min] | Area [mAU*s] | Height [mAU] | Area %  |
|--------|---------------|------|-------------|--------------|--------------|---------|
| 1      | 8.520         | VB R | 0.2198      | 3598.10596   | 250.34334    | 50.4370 |
| 2      | 17.119        | BB   | 0.5306      | 3535.75171   | 103.48499    | 49.5630 |

Totals : 7133.85767 353.82833

**Supplementary Figure 147. HPLC data of 6b**

=====  
Acq. Operator : Location : 1  
Injection Date : 11/09/2019 10:19:20  
Acq. Method : JFeng.M  
Analysis Method : F:\METHOD\ZK.M  
Last changed : 14/07/2019 15:34:15 by  
Additional Info : Peak(s) manually integrated

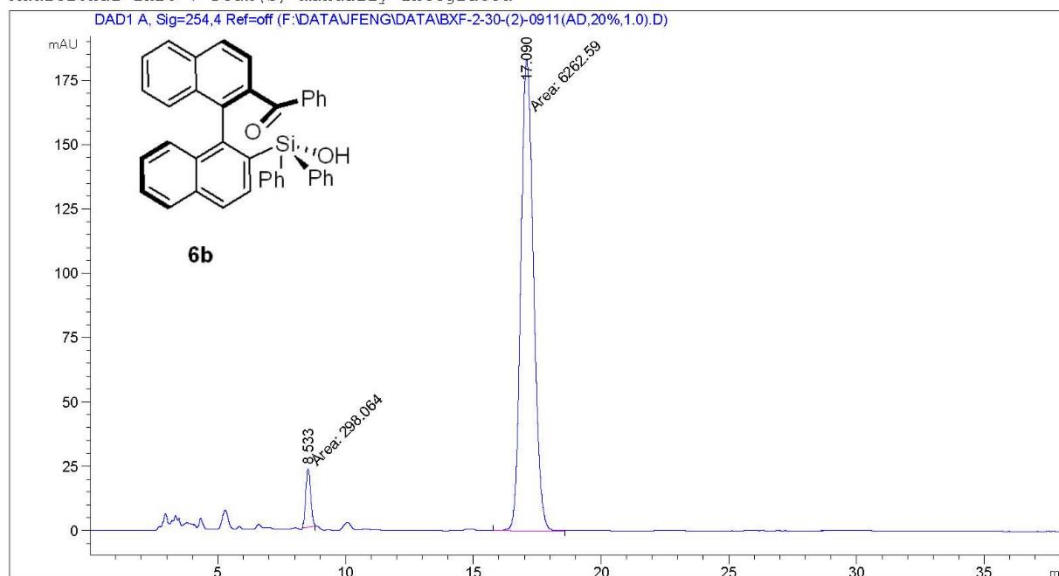

=====  
Area Percent Report  
=====

Sorted By : Signal  
Multiplier : 1.0000  
Dilution : 1.0000  
Use Multiplier & Dilution Factor with ISTDs

Signal 1: DAD1 A, Sig=254,4 Ref=off

| Peak # | RetTime [min] | Type | Width [min] | Area [mAU*s] | Height [mAU] | Area %  |
|--------|---------------|------|-------------|--------------|--------------|---------|
| 1      | 8.533         | MM   | 0.2184      | 298.06430    | 22.74938     | 4.5432  |
| 2      | 17.090        | MM   | 0.5704      | 6262.58691   | 183.00049    | 95.4568 |

Totals : 6560.65121 205.74987

=====  
\*\*\* End of Report \*\*\*

**Supplementary Figure 148. HPLC data of 6b**

Data File F:\DATA\JFENG\DATA\BXF-2-73(AD,15%,1.0).D  
Sample Name: BXF-2-73(AD,15%,1.0)

=====  
Acq. Operator :  
Sample Operator :  
Acq. Instrument : LC1260 Location : 1  
Injection Date : 06/10/2019 20:03:26 Inj Volume : No inj  
Acq. Method : C:\Chem32\1\Methods\DEF\_LC.M  
Last changed : 06/10/2019 19:53:44 by  
(modified after loading)  
Analysis Method : F:\METHOD\ZK.M  
Last changed : 14/07/2019 15:34:15 by  
Additional Info : Peak(s) manually integrated

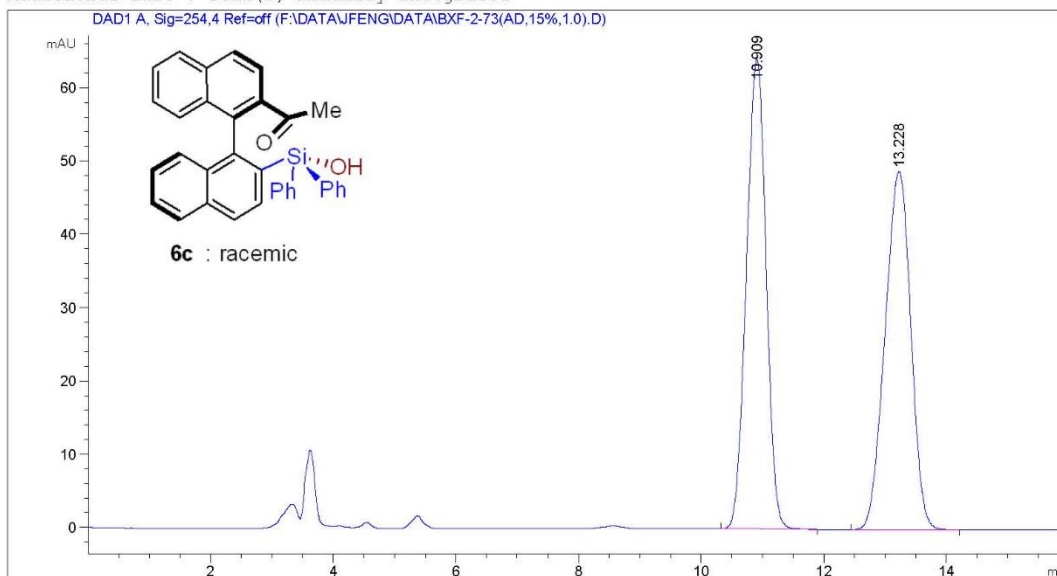

=====  
Area Percent Report  
=====

Sorted By : Signal  
Multiplier : 1.0000  
Dilution : 1.0000  
Use Multiplier & Dilution Factor with ISTDs

Signal 1: DAD1 A, Sig=254,4 Ref=off

| Peak # | RetTime [min] | Type | Width [min] | Area [mAU*s] | Height [mAU] | Area %  |
|--------|---------------|------|-------------|--------------|--------------|---------|
| 1      | 10.909        | BB   | 0.3515      | 1426.47388   | 64.12357     | 50.0319 |
| 2      | 13.228        | BB   | 0.4561      | 1424.65601   | 48.86647     | 49.9681 |

Totals : 2851.12988 112.99004

LC1260 30/11/2019 10:05:30

Page 1 of 2

**Supplementary Figure 149. HPLC data of 6c**

Data File F:\DATA\JFENG\DATA\BXF-2-71(AD,15%,1.0).D  
Sample Name: BXF-2-71(AD,15%,1.0)

=====  
Acq. Operator : Location : 1  
Injection Date : 06/10/2019 20:30:50  
Acq. Method : DEF\_LC.M  
Analysis Method : F:\METHOD\ZK.M  
Last changed : 14/07/2019 15:34:15 by  
Additional Info : Peak(s) manually integrated

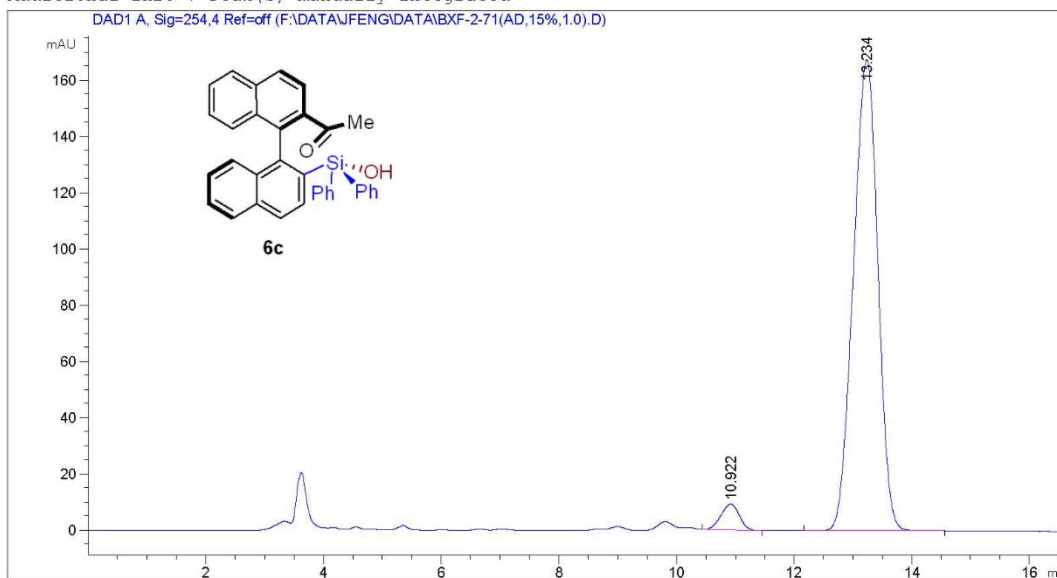

=====  
Area Percent Report  
=====

Sorted By : Signal  
Multiplier : 1.0000  
Dilution : 1.0000  
Use Multiplier & Dilution Factor with ISTDs

Signal 1: DAD1 A, Sig=254,4 Ref=off

| Peak # | RetTime [min] | Type | Width [min] | Area [mAU*s] | Height [mAU] | Area %  |
|--------|---------------|------|-------------|--------------|--------------|---------|
| 1      | 10.922        | BB   | 0.3409      | 199.83362    | 9.21795      | 3.9765  |
| 2      | 13.234        | BB   | 0.4523      | 4825.53223   | 167.40480    | 96.0235 |

Totals : 5025.36584 176.62275

=====  
\*\*\* End of Report \*\*\*

**Supplementary Figure 150. HPLC data of 6c**

Data File F:\DATA\JFENG\DATA\BXF-2-74-2 (AD,5%,1.0).D  
Sample Name: BXF-2-74-2 (AD,5%,1.0)

=====  
Acq. Operator :  
Sample Operator :  
Acq. Instrument : LC1260 Location : 1  
Injection Date : 10/10/2019 19:57:58 Inj Volume : No inj  
Acq. Method : C:\Chem32\1\Methods\DEF\_LC.M  
Last changed : 10/10/2019 19:49:52 by  
(modified after loading)  
Analysis Method : F:\METHOD\ZK.M  
Last changed : 14/07/2019 15:34:15 by  
Additional Info : Peak(s) manually integrated

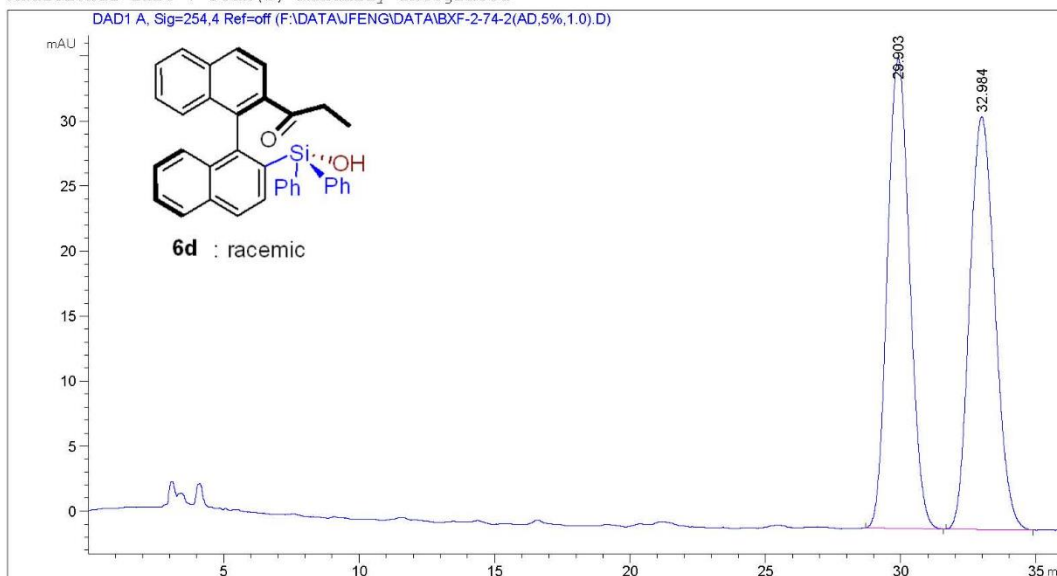

=====  
Area Percent Report  
=====

Sorted By : Signal  
Multiplier : 1.0000  
Dilution : 1.0000  
Use Multiplier & Dilution Factor with ISTDs

Signal 1: DAD1 A, Sig=254,4 Ref=off

| Peak # | RetTime [min] | Type | Width [min] | Area [mAU*s] | Height [mAU] | Area %  |
|--------|---------------|------|-------------|--------------|--------------|---------|
| 1      | 29.903        | BB   | 0.8909      | 2052.03784   | 36.11281     | 49.9056 |
| 2      | 32.984        | BB   | 0.9987      | 2059.80151   | 31.75861     | 50.0944 |

Totals : 4111.83936 67.87142

**Supplementary Figure 151. HPLC data of 6d**

Data File F:\DATA\JFENG\DATA\BXF-2-81-1(AD,5%,1.0).D  
Sample Name: BXF-2-81-1(AD,5%,1.0)

=====  
Acq. Operator : Location : 1  
Injection Date : 09/10/2019 16:30:49  
Acq. Method : DEF\_LC.M  
Analysis Method : F:\METHOD\ZK.M  
Last changed : 14/07/2019 15:34:15 by  
Additional Info : Peak(s) manually integrated

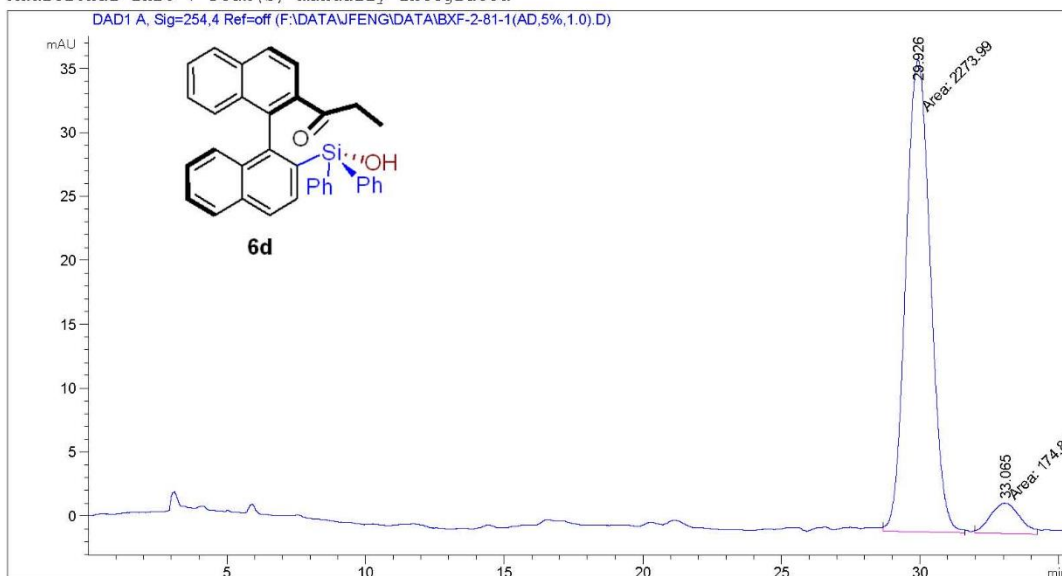

=====  
Area Percent Report  
=====

Sorted By : Signal  
Multiplier : 1.0000  
Dilution : 1.0000  
Use Multiplier & Dilution Factor with ISTDs

Signal 1: DAD1 A, Sig=254,4 Ref=off

| Peak # | RetTime [min] | Type | Width [min] | Area [mAU*s] | Height [mAU] | Area %  |
|--------|---------------|------|-------------|--------------|--------------|---------|
| 1      | 29.926        | MM   | 1.0270      | 2273.98682   | 36.90383     | 92.8611 |
| 2      | 33.065        | MM   | 1.2275      | 174.81848    | 2.37354      | 7.1389  |

Totals : 2448.80530 39.27737

=====  
\*\*\* End of Report \*\*\*

**Supplementary Figure 152. HPLC data of 6d**

Data File F:\DATA\JFENG\DATA\FJ-11-17-rac(AD,10%,1.0).D  
Sample Name: FJ-11-17-rac(AD,10%,1.0)

=====  
Acq. Operator :  
Sample Operator :  
Acq. Instrument : LC1260 Location : 1  
Injection Date : 11/10/2019 15:51:57 Inj Volume : Manually  
  
Acq. Method : F:\METHOD\JFeng.M  
Last changed : 11/10/2019 15:42:49 by  
(modified after loading)  
Analysis Method : F:\METHOD\ZK.M  
Last changed : 14/07/2019 15:34:15 by  
Additional Info : Peak(s) manually integrated

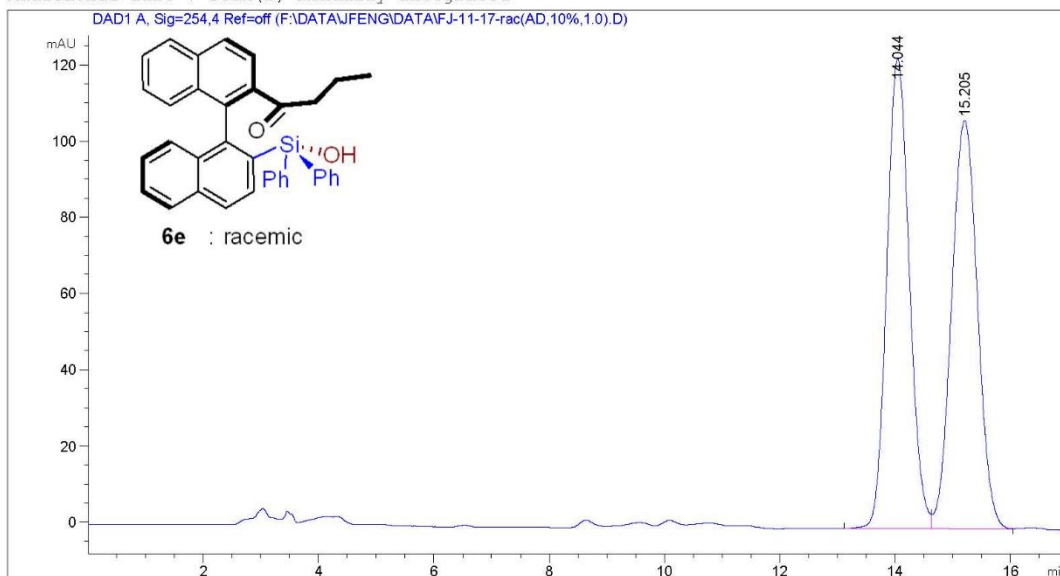

=====  
Area Percent Report  
=====

Sorted By : Signal  
Multiplier : 1.0000  
Dilution : 1.0000  
Use Multiplier & Dilution Factor with ISTDs

Signal 1: DAD1 A, Sig=254,4 Ref=off

| Peak # | RetTime [min] | Type | Width [min] | Area [mAU*s] | Height [mAU] | Area %  |
|--------|---------------|------|-------------|--------------|--------------|---------|
| 1      | 14.044        | BV   | 0.4236      | 3334.27148   | 123.24934    | 50.0597 |
| 2      | 15.205        | VB   | 0.4903      | 3326.31982   | 107.10140    | 49.9403 |

Totals : 6660.59131 230.35074

**Supplementary Figure 153. HPLC data of 6e**



Data File F:\DATA\JFENG\DATA\FJ-11-16(AD,10%,1.0).D  
Sample Name: FJ-11-16(AD,10%,1.0)

=====  
Acq. Operator : Location : 1  
Injection Date : 11/10/2019 16:11:50  
Acq. Method : JFeng.M  
Analysis Method : F:\METHOD\ZK.M  
Last changed : 14/07/2019 15:34:15 by  
Additional Info : Peak(s) manually integrated

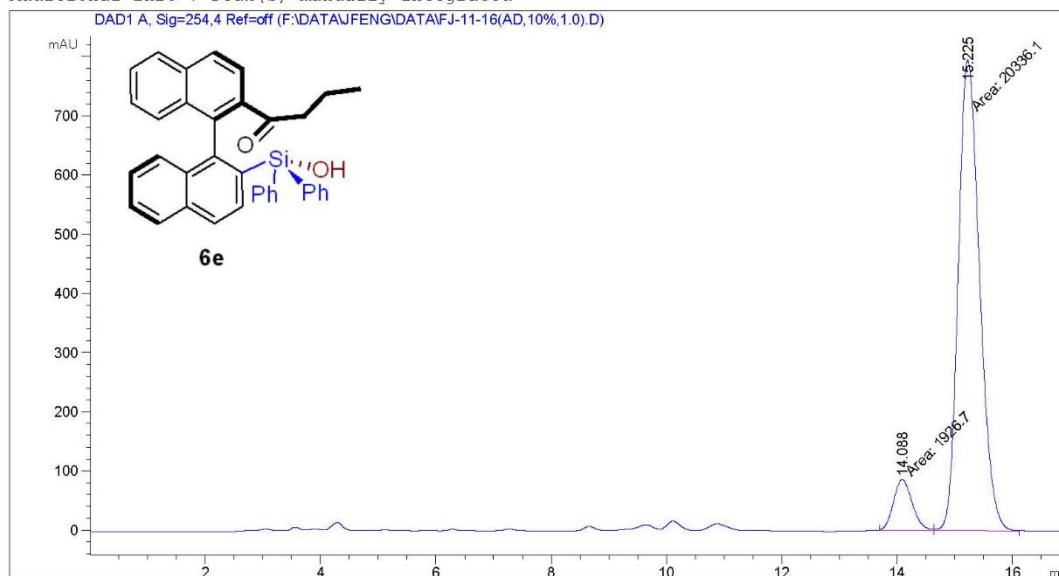

=====  
Area Percent Report  
=====

Sorted By : Signal  
Multiplier : 1.0000  
Dilution : 1.0000  
Use Multiplier & Dilution Factor with ISTDs

Signal 1: DAD1 A, Sig=254,4 Ref=off

| Peak # | RetTime [min] | Type | Width [min] | Area [mAU*s] | Height [mAU] | Area %  |
|--------|---------------|------|-------------|--------------|--------------|---------|
| 1      | 14.088        | MM   | 0.3750      | 1926.70337   | 85.64039     | 8.6543  |
| 2      | 15.225        | MM   | 0.4260      | 2.03361e4    | 795.60052    | 91.3457 |

Totals : 2.22628e4 881.24091

=====  
\*\*\* End of Report \*\*\*

**Supplementary Figure 154. HPLC data of 6e**

Data File F:\DATA\JFENG\DATA\FJ-11-19-rac(AD,10%,1.0).D  
Sample Name: FJ-11-19-rac(AD,10%,1.0)

=====  
Acq. Operator :  
Sample Operator :  
Acq. Instrument : LC1260 Location : 1  
Injection Date : 11/10/2019 16:31:48 Inj Volume : Manually  
Acq. Method : F:\METHOD\JFeng.M  
Last changed : 11/10/2019 15:42:49 by  
(modified after loading)  
Analysis Method : F:\METHOD\ZK.M  
Last changed : 14/07/2019 15:34:15 by  
Additional Info : Peak(s) manually integrated

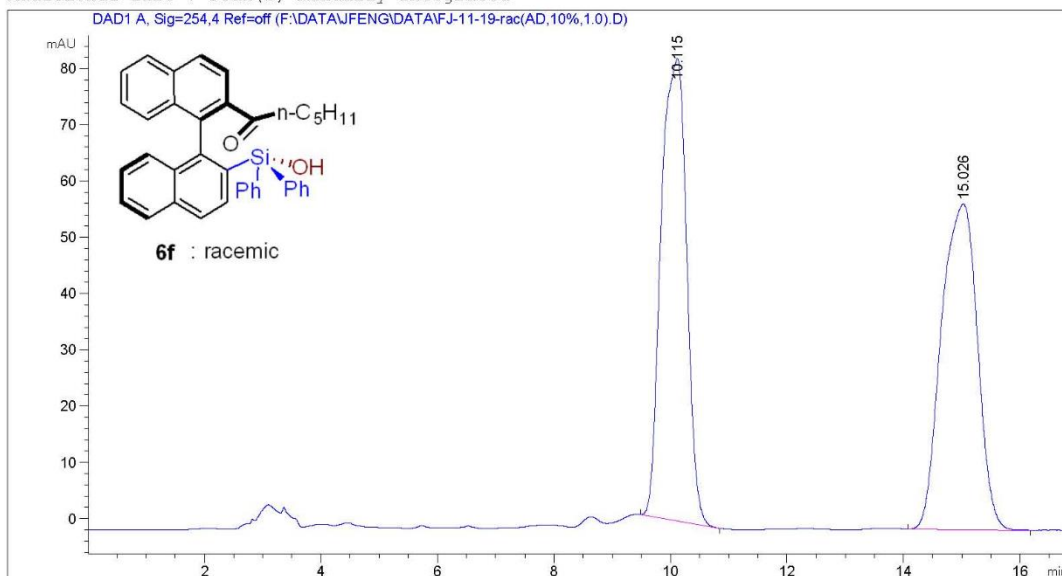

=====  
Area Percent Report  
=====

Sorted By : Signal  
Multiplier : 1.0000  
Dilution : 1.0000  
Use Multiplier & Dilution Factor with ISTDs

Signal 1: DAD1 A, Sig=254,4 Ref=off

| Peak # | RetTime [min] | Type | Width [min] | Area [mAU*s] | Height [mAU] | Area %  |
|--------|---------------|------|-------------|--------------|--------------|---------|
| 1      | 10.115        | BB   | 0.4213      | 2487.20947   | 82.14089     | 50.0878 |
| 2      | 15.026        | BB   | 0.7055      | 2478.48828   | 57.89181     | 49.9122 |

Totals : 4965.69775 140.03270

**Supplementary Figure 155. HPLC data of 6f**

=====  
Acq. Operator :  
Sample Operator :  
Acq. Instrument : LC1260 Location : 1  
Injection Date : 11/10/2019 16:52:17 Inj Volume : Manually  
Acq. Method : F:\METHOD\JFeng.M  
Last changed : 11/10/2019 15:42:49 by  
(modified after loading)  
Analysis Method : F:\METHOD\ZK.M  
Last changed : 14/07/2019 15:34:15 by  
Additional Info : Peak(s) manually integrated

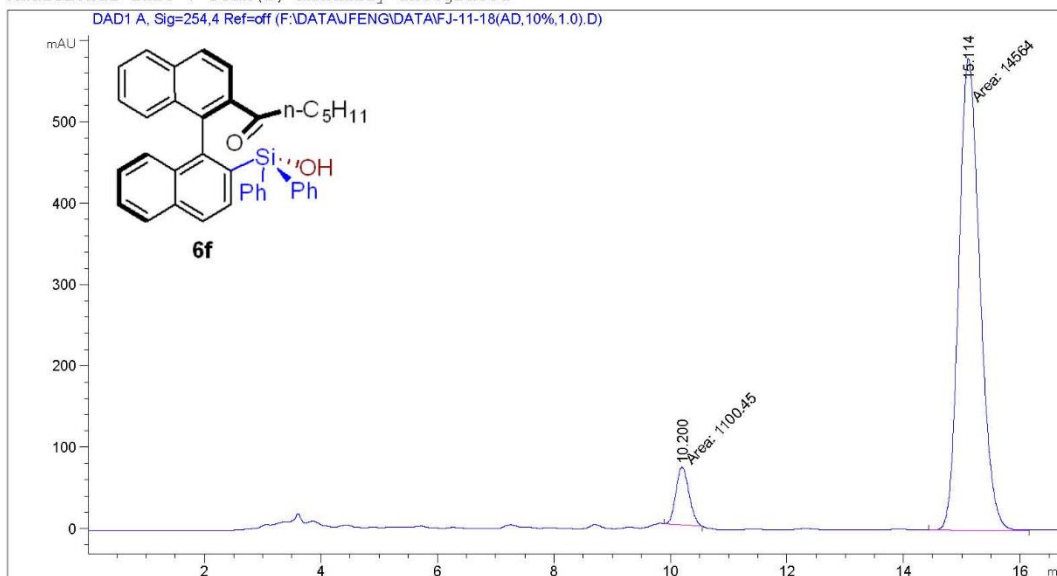

=====  
Area Percent Report  
=====

Sorted By : Signal  
Multiplier : 1.0000  
Dilution : 1.0000  
Use Multiplier & Dilution Factor with ISTDs

Signal 1: DAD1 A, Sig=254,4 Ref=off

| Peak # | RetTime [min] | Type | Width [min] | Area [mAU*s] | Height [mAU] | Area %  |
|--------|---------------|------|-------------|--------------|--------------|---------|
| 1      | 10.200        | MM   | 0.2587      | 1100.44836   | 70.89850     | 7.0251  |
| 2      | 15.114        | MM   | 0.4187      | 1.45640e4    | 579.76477    | 92.9749 |

Totals : 1.56645e4 650.66327

**Supplementary Figure 156. HPLC data of 6f**

Data File F:\DATA\JFENG\DATA\LN-1-9(AD,20%,1.0).D  
Sample Name: LN-1-9(AD,20%,1.0)

=====  
Acq. Operator :  
Sample Operator :  
Acq. Instrument : LC1260 Location : 1  
Injection Date : 14/10/2019 16:15:31 Inj Volume : No inj  
Acq. Method : C:\Chem32\1\Methods\DEF\_LC.M  
Last changed : 14/10/2019 15:32:00 by  
(modified after loading)  
Analysis Method : F\METHOD\ZK.M  
Last changed : 14/07/2019 15:34:15 by  
Additional Info : Peak(s) manually integrated

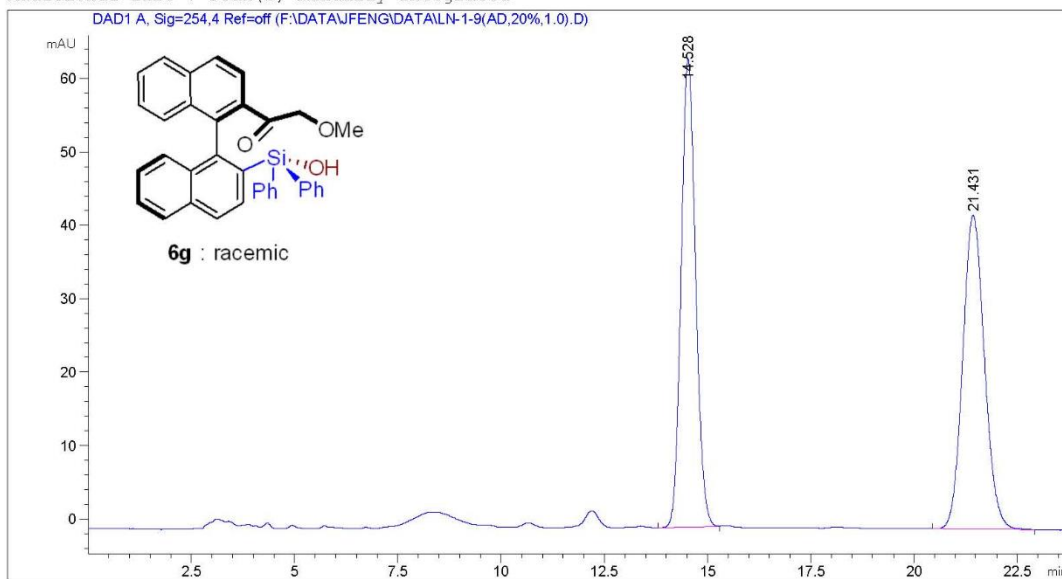

=====  
Area Percent Report  
=====

Sorted By : Signal  
Multiplier : 1.0000  
Dilution : 1.0000  
Use Multiplier & Dilution Factor with ISTDs

Signal 1: DAD1 A, Sig=254,4 Ref=off

| Peak # | RetTime [min] | Type | Width [min] | Area [mAU*s] | Height [mAU] | Area %  |
|--------|---------------|------|-------------|--------------|--------------|---------|
| 1      | 14.528        | BB   | 0.3775      | 1549.51868   | 63.77249     | 49.8408 |
| 2      | 21.431        | BB   | 0.5662      | 1559.41711   | 42.68543     | 50.1592 |

Totals : 3108.93579 106.45792

**Supplementary Figure 157. HPLC data of 6g**

Data File F:\DATA\JFENG\DATA\BXF-2-85 (AD,80%,1.0).D  
Sample Name: BXF-2-85 (AD,80%,1.0)

=====  
Acq. Operator :  
Sample Operator :  
Acq. Instrument : LC1260 Location : 1  
Injection Date : 16/10/2019 19:40:12 Inj Volume : No inj  
Acq. Method : F:\METHOD\ZK.M  
Last changed : 16/10/2019 19:31:05 by  
(modified after loading)  
Analysis Method : F:\METHOD\ZK.M  
Last changed : 14/07/2019 15:34:15 by  
Additional Info : Peak(s) manually integrated

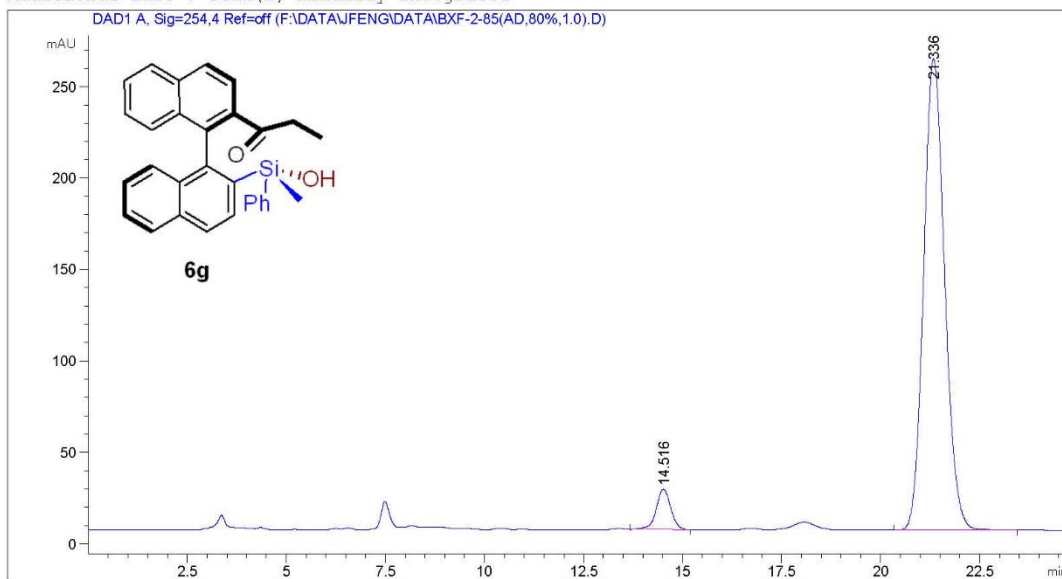

=====  
Area Percent Report  
=====

Sorted By : Signal  
Multiplier : 1.0000  
Dilution : 1.0000  
Use Multiplier & Dilution Factor with ISTDs

Signal 1: DAD1 A, Sig=254,4 Ref=off

| Peak # | RetTime [min] | Type | Width [min] | Area [mAU*s] | Height [mAU] | Area %  |
|--------|---------------|------|-------------|--------------|--------------|---------|
| 1      | 14.516        | BB   | 0.3906      | 561.67645    | 22.09038     | 5.6016  |
| 2      | 21.336        | BB   | 0.5726      | 9465.40332   | 257.65445    | 94.3984 |

Totals : 1.00271e4 279.74463

**Supplementary Figure 158. HPLC data of 6g**

Data File F:\DATA\JFENG\DATA\FJ-11-80(AD,20%,1.0).D  
Sample Name: FJ-11-80(AD,20%,1.0)

=====  
Acq. Operator : Location : 1  
Injection Date : 14/11/2019 20:51:16  
Acq. Method : DEF\_LC.M  
Analysis Method : F:\METHOD\ZK.M  
Last changed : 14/07/2019 15:34:15 by  
Additional Info : Peak(s) manually integrated

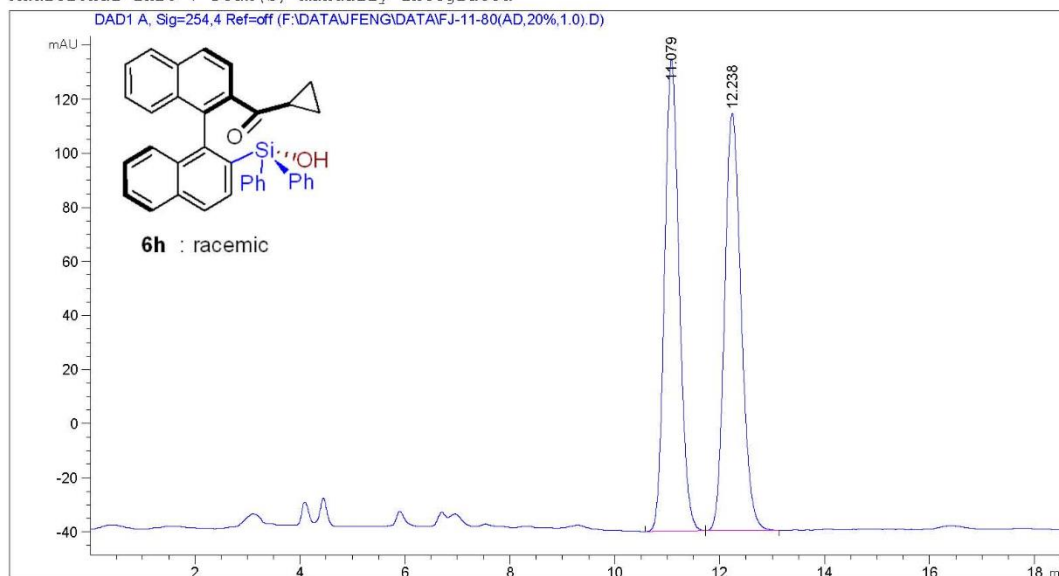

=====  
Area Percent Report  
=====

Sorted By : Signal  
Multiplier : 1.0000  
Dilution : 1.0000  
Use Multiplier & Dilution Factor with ISTDs

Signal 1: DAD1 A, Sig=254,4 Ref=off

| Peak # | RetTime [min] | Type | Width [min] | Area [mAU*s] | Height [mAU] | Area %  |
|--------|---------------|------|-------------|--------------|--------------|---------|
| 1      | 11.079        | BB   | 0.2995      | 3369.19971   | 174.28862    | 49.9996 |
| 2      | 12.238        | BB   | 0.3367      | 3369.25903   | 154.30183    | 50.0004 |

Totals : 6738.45874 328.59045

=====  
\*\*\* End of Report \*\*\*

**Supplementary Figure 159. HPLC data of 6h**

Data File F:\DATA\JFENG\DATA\FJ-11-79-re(AD,20%,1.0).D  
Sample Name: FJ-11-79-re(AD,20%,1.0)

=====  
Acq. Operator :  
Sample Operator :  
Acq. Instrument : LC1260 Location : 1  
Injection Date : 17/11/2019 20:32:33 Inj Volume : Manually  
Acq. Method : F:\METHOD\JFeng.M  
Last changed : 17/11/2019 20:02:36 by  
(modified after loading)  
Analysis Method : F:\METHOD\ZK.M  
Last changed : 14/07/2019 15:34:15 by  
Additional Info : Peak(s) manually integrated

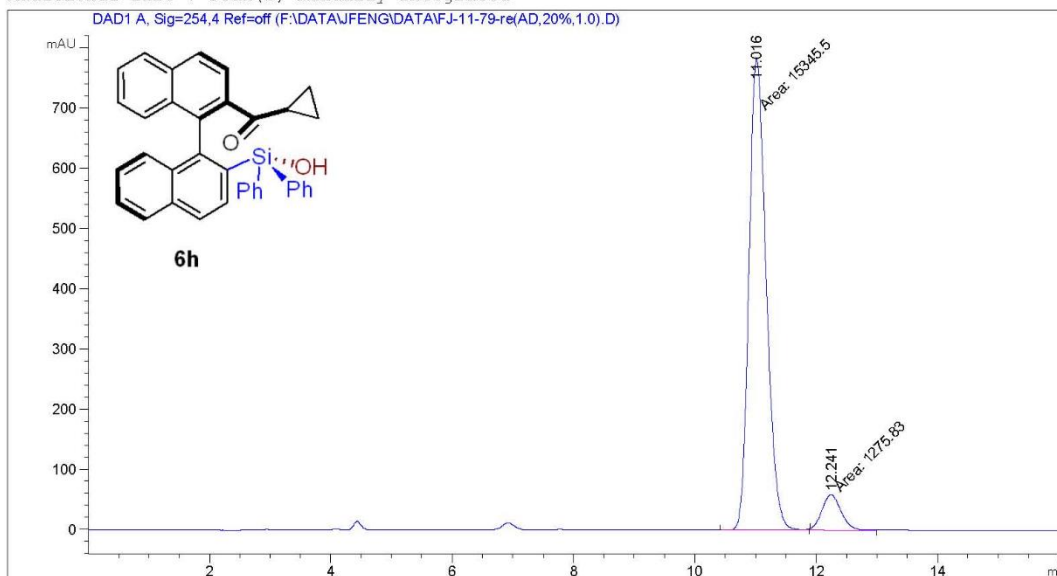

=====  
Area Percent Report  
=====

Sorted By : Signal  
Multiplier : 1.0000  
Dilution : 1.0000  
Use Multiplier & Dilution Factor with ISTDs

Signal 1: DAD1 A, Sig=254,4 Ref=off

| Peak # | RetTime [min] | Type | Width [min] | Area [mAU*s] | Height [mAU] | Area %  |
|--------|---------------|------|-------------|--------------|--------------|---------|
| 1      | 11.016        | MM   | 0.3266      | 1.53455e4    | 783.07855    | 92.3242 |
| 2      | 12.241        | MM   | 0.3632      | 1275.82849   | 58.54312     | 7.6758  |

Totals : 1.66214e4 841.62167

**Supplementary Figure 160. HPLC data of 6h**

Data File F:\DATA\JFENG\DATA\BXF-2-28(AD-H,15%,1.0).D  
Sample Name: BXF-2-28(AD-H,15%,1.0)

=====  
Acq. Operator : Location : 1  
Injection Date : 09/09/2019 20:22:35  
Acq. Method : DEF\_LC.M  
Analysis Method : F:\METHOD\ZK.M  
Last changed : 14/07/2019 15:34:15 by  
Additional Info : Peak(s) manually integrated

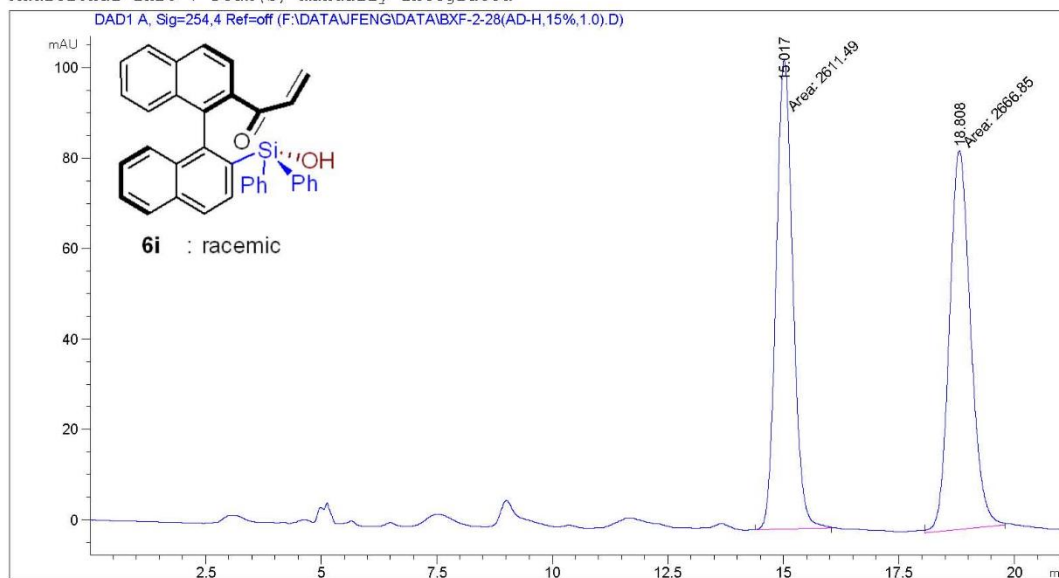

=====  
Area Percent Report  
=====

Sorted By : Signal  
Multiplier : 1.0000  
Dilution : 1.0000  
Use Multiplier & Dilution Factor with ISTDs

Signal 1: DAD1 A, Sig=254,4 Ref=off

| Peak # | RetTime [min] | Type | Width [min] | Area [mAU*s] | Height [mAU] | Area %  |
|--------|---------------|------|-------------|--------------|--------------|---------|
| 1      | 15.017        | MM   | 0.4193      | 2611.48633   | 103.79387    | 49.4755 |
| 2      | 18.808        | MM   | 0.5307      | 2666.85132   | 83.75375     | 50.5245 |

Totals : 5278.33765 187.54762

=====  
\*\*\* End of Report \*\*\*

**Supplementary Figure 161. HPLC data of 6i**



Data File F:\DATA\JFENG\DATA\BXF-2-33-repeat(AD,15%,1.0).D  
Sample Name: BXF-2-33-repeat(AD,15%,1.0)

=====  
Acq. Operator : Location : 1  
Injection Date : 16/09/2019 21:56:43  
Acq. Method : DEF\_LC.M  
Analysis Method : F:\METHOD\ZK.M  
Last changed : 14/07/2019 15:34:15 by  
Additional Info : Peak(s) manually integrated

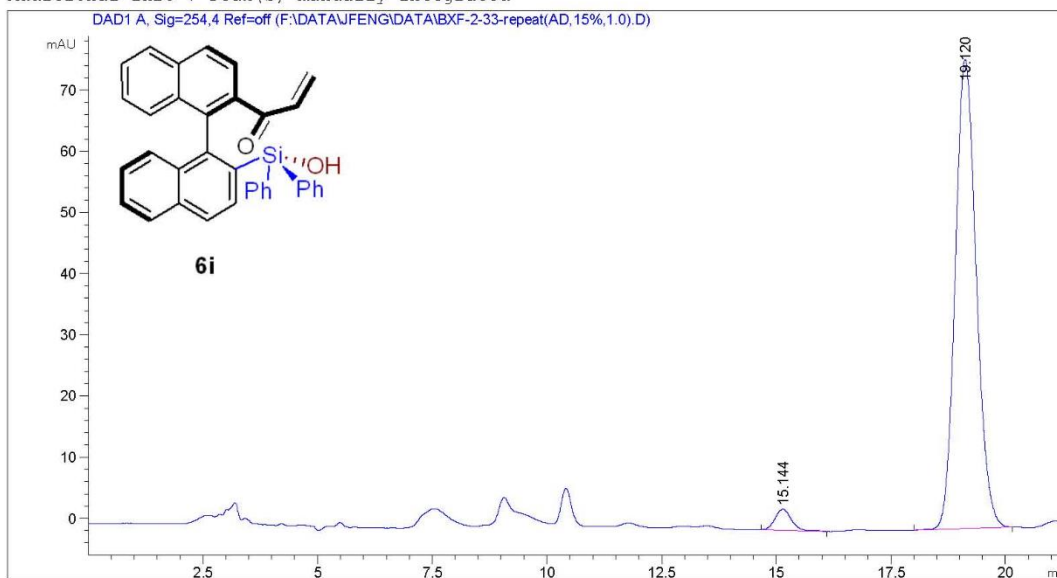

=====  
Area Percent Report  
=====

Sorted By : Signal  
Multiplier : 1.0000  
Dilution : 1.0000  
Use Multiplier & Dilution Factor with ISTDs

Signal 1: DAD1 A, Sig=254,4 Ref=off

| Peak # | RetTime [min] | Type | Width [min] | Area [mAU*s] | Height [mAU] | Area %  |
|--------|---------------|------|-------------|--------------|--------------|---------|
| 1      | 15.144        | BB   | 0.3823      | 83.10104     | 3.43480      | 3.2995  |
| 2      | 19.120        | BB   | 0.4930      | 2435.51465   | 76.59618     | 96.7005 |

Totals : 2518.61569 80.03099

=====  
\*\*\* End of Report \*\*\*

**Supplementary Figure 162. HPLC data of 6i**

Data File F:\DATA\JFENG\DATA\FJ-11-23-rac(AD,10%,1.0).D  
 Sample Name: FJ-11-23-rac(AD,10%,1.0)

```

=====
Acq. Operator   :
Sample Operator :
Acq. Instrument : LC1260                      Location : 1
Injection Date  : 04/12/2019 19:37:19        Inj Volume : Manually

Acq. Method     : F:\METHOD\JFeng.M
Last changed    : 04/12/2019 19:29:04 by
                  (modified after loading)
Analysis Method : C:\Chem32\1\Methods\DEF_LC.M
Last changed    : 13/02/2014 23:27:44 by SYSTEM
Additional Info  : Peak(s) manually integrated
  
```

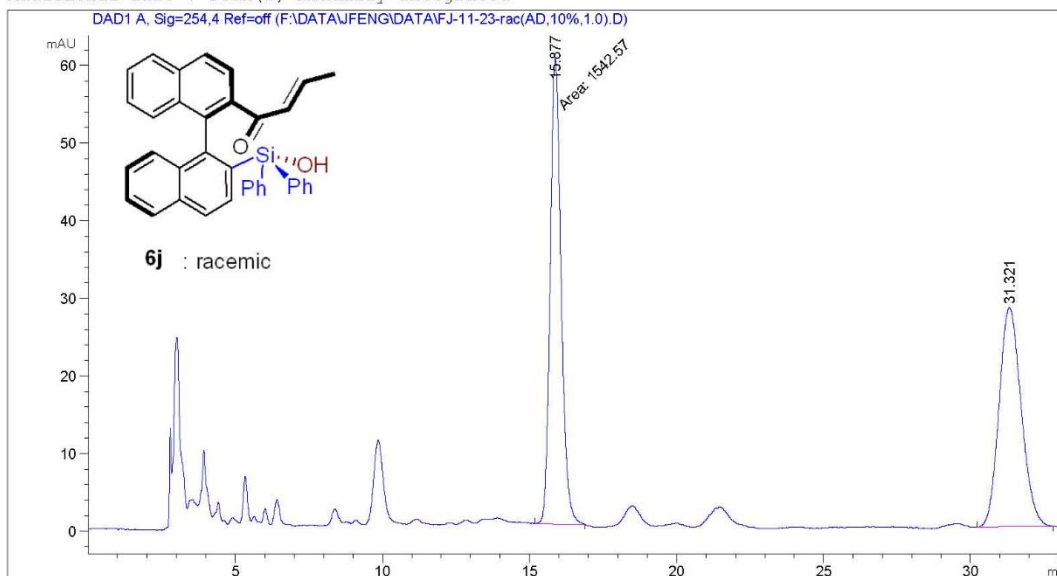

Area Percent Report

```

Sorted By      : Signal
Multiplier     : 1.0000
Dilution       : 1.0000
Use Multiplier & Dilution Factor with ISTDs
  
```

Signal 1: DAD1 A, Sig=254,4 Ref=off

| Peak # | RetTime [min] | Type | Width [min] | Area [mAU*s] | Height [mAU] | Area %  |
|--------|---------------|------|-------------|--------------|--------------|---------|
| 1      | 15.877        | MM   | 0.4289      | 1542.57129   | 59.94010     | 51.0402 |
| 2      | 31.321        | BB   | 0.7572      | 1479.69543   | 28.24319     | 48.9598 |

Totals : 3022.26672 88.18329

**Supplementary Figure 163. HPLC data of 6j**

Data File F:\DATA\JFENG\DATA\FJ-10-119(AD,10%,1.0).D  
Sample Name: FJ-10-119(AD,10%,1.0)

```
=====
Acq. Operator   :
Sample Operator :
Acq. Instrument : LC1260                      Location : 1
Injection Date  : 10/07/2019 10:26:22        Inj Volume : No inj

Acq. Method    : C:\Chem32\1\Methods\DEF_LC.M
Last changed   : 10/07/2019 09:37:25 by
                (modified after loading)
Analysis Method : C:\Chem32\1\Methods\DEF_LC.M
Last changed   : 13/02/2014 23:27:44 by SYSTEM
Additional Info : Peak(s) manually integrated
=====
```

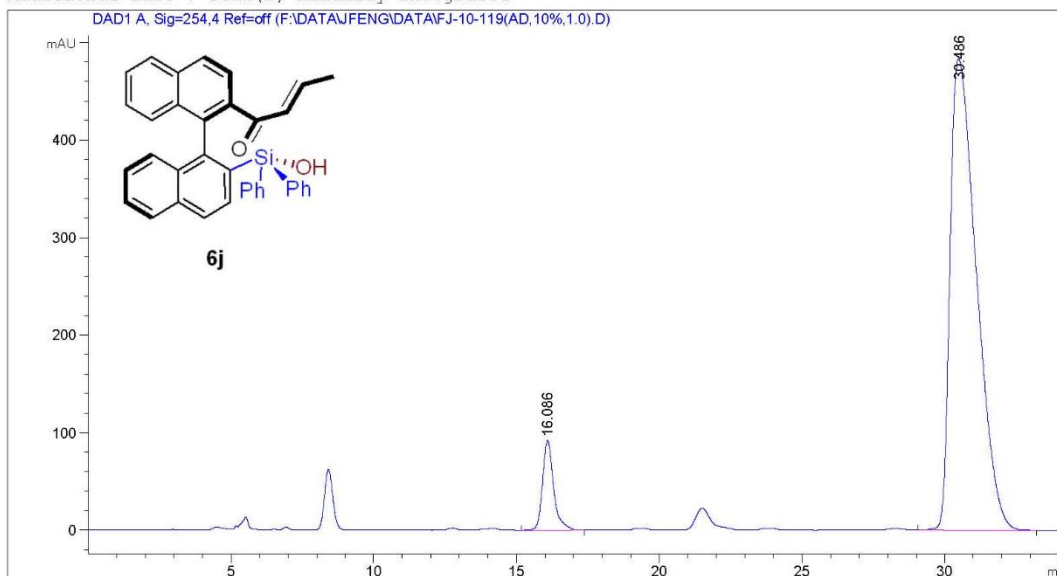

=====  
Area Percent Report  
=====

Sorted By : Signal  
Multiplier : 1.0000  
Dilution : 1.0000  
Use Multiplier & Dilution Factor with ISTDs

Signal 1: DAD1 A, Sig=254,4 Ref=off

| Peak # | RetTime [min] | Type | Width [min] | Area [mAU*s] | Height [mAU] | Area %  |
|--------|---------------|------|-------------|--------------|--------------|---------|
| 1      | 16.086        | BB   | 0.4097      | 2490.03491   | 92.01404     | 7.4696  |
| 2      | 30.486        | BB   | 0.9607      | 3.08457e4    | 483.23419    | 92.5304 |

Totals : 3.33357e4 575.24823

**Supplementary Figure 164. HPLC data of 6j**

Data File F:\DATA\JFENG\DATA\FJ-10-168 (AD,20%,1.0).D  
Sample Name: FJ-10-168 (AD,20%,1.0)

=====  
Acq. Operator : Location : 1  
Injection Date : 06/09/2019 10:47:06  
Acq. Method : JFeng.M  
Analysis Method : F:\METHOD\ZK.M  
Last changed : 14/07/2019 15:34:15 by  
Additional Info : Peak(s) manually integrated

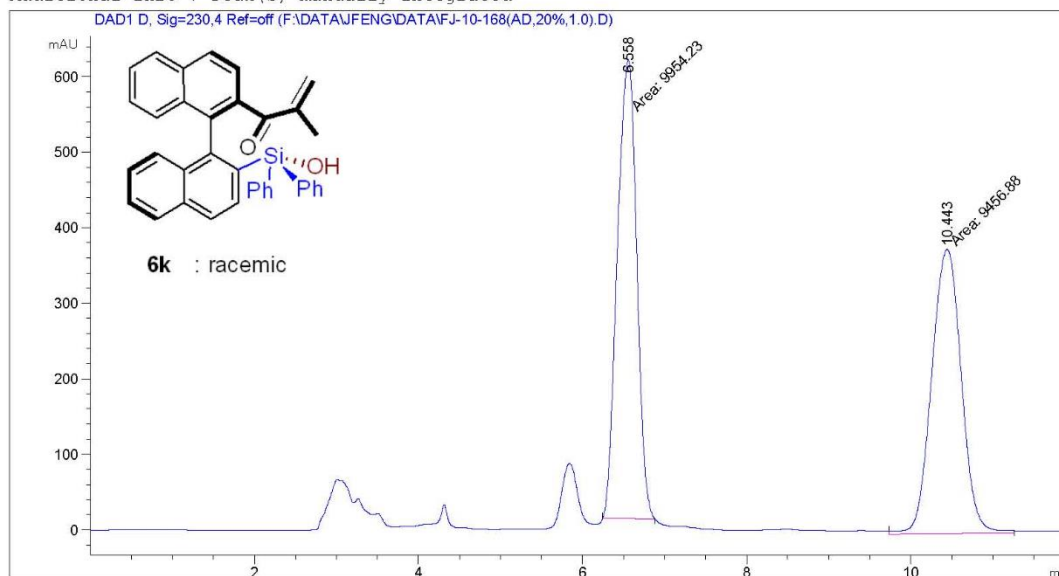

=====  
Area Percent Report  
=====

Sorted By : Signal  
Multiplier : 1.0000  
Dilution : 1.0000  
Use Multiplier & Dilution Factor with ISTDs

Signal 1: DAD1 D, Sig=230,4 Ref=off

| Peak # | RetTime [min] | Type | Width [min] | Area [mAU*s] | Height [mAU] | Area %  |
|--------|---------------|------|-------------|--------------|--------------|---------|
| 1      | 6.558         | MM   | 0.2729      | 9954.22949   | 608.02948    | 51.2811 |
| 2      | 10.443        | MM   | 0.4187      | 9456.88184   | 376.44547    | 48.7189 |

Totals : 1.94111e4 984.47495

=====  
\*\*\* End of Report \*\*\*

**Supplementary Figure 165. HPLC data of 6k**

Data File F:\DATA\JFENG\DATA\FJ-10-166(AD,20%,1.0).D  
Sample Name: FJ-10-166(AD,20%,1.0)

=====  
Acq. Operator :  
Sample Operator :  
Acq. Instrument : LC1260 Location : 1  
Injection Date : 06/09/2019 11:02:35 Inj Volume : Manually  
Acq. Method : F:\METHOD\JFeng.M  
Last changed : 06/09/2019 10:15:53 by  
(modified after loading)  
Analysis Method : F:\METHOD\ZK.M  
Last changed : 14/07/2019 15:34:15 by  
Additional Info : Peak(s) manually integrated

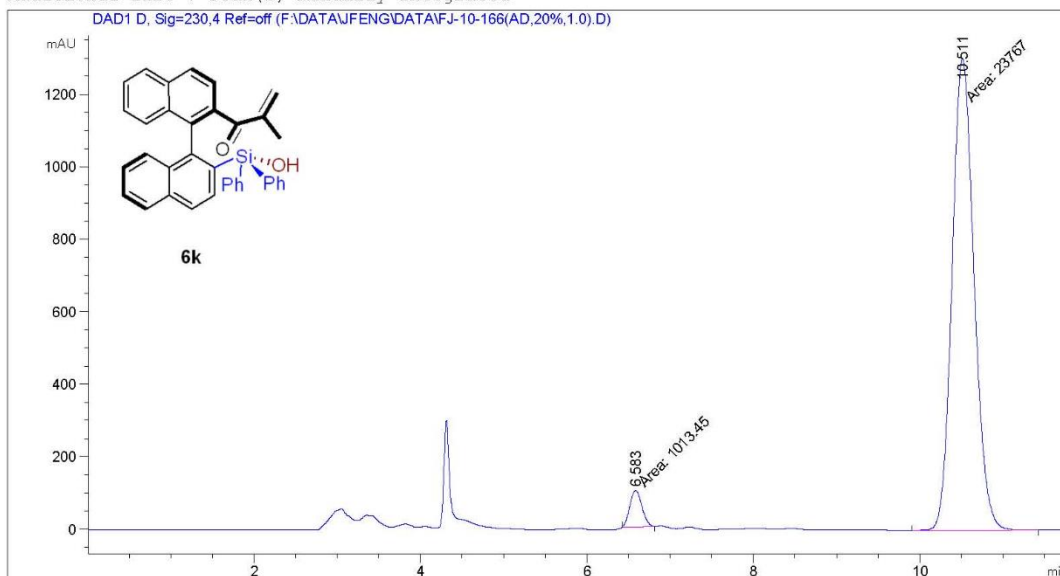

=====  
Area Percent Report  
=====

Sorted By : Signal  
Multiplier : 1.0000  
Dilution : 1.0000  
Use Multiplier & Dilution Factor with ISTDs

Signal 1: DAD1 D, Sig=230,4 Ref=off

| Peak # | RetTime [min] | Type | Width [min] | Area [mAU*s] | Height [mAU] | Area %  |
|--------|---------------|------|-------------|--------------|--------------|---------|
| 1      | 6.583         | MM   | 0.1672      | 1013.44720   | 101.00916    | 4.0897  |
| 2      | 10.511        | MM   | 0.3043      | 2.37670e4    | 1301.72522   | 95.9103 |

Totals : 2.47804e4 1402.73438

**Supplementary Figure 166. HPLC data of 6k**

Data File F:\DATA\JFENG\DATA\LN-1-6-2(AD,20%,1.0).D  
Sample Name: LN-1-6-2(AD,20%,1.0)

=====  
Acq. Operator : Location : 1  
Injection Date : 25/09/2019 20:35:22  
Acq. Method : DEF\_LC.M  
Analysis Method : F:\METHOD\ZK.M  
Last changed : 14/07/2019 15:34:15 by  
Additional Info : Peak(s) manually integrated

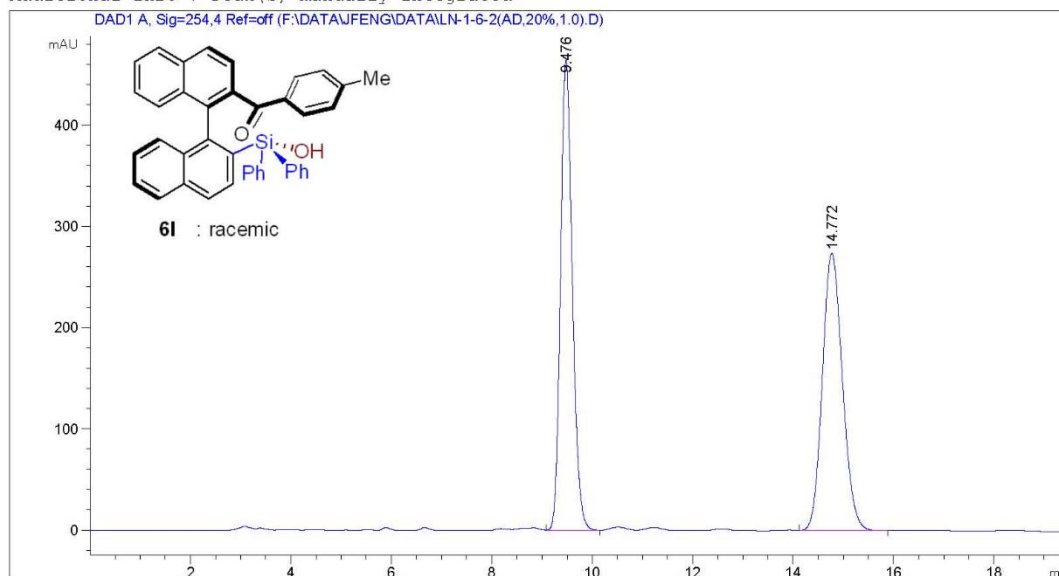

=====  
Area Percent Report  
=====

Sorted By : Signal  
Multiplier : 1.0000  
Dilution : 1.0000  
Use Multiplier & Dilution Factor with ISTDs

Signal 1: DAD1 A, Sig=254,4 Ref=off

| Peak # | RetTime [min] | Type | Width [min] | Area [mAU*s] | Height [mAU] | Area %  |
|--------|---------------|------|-------------|--------------|--------------|---------|
| 1      | 9.476         | BB   | 0.2499      | 7564.23047   | 464.71857    | 49.9657 |
| 2      | 14.772        | BB   | 0.4291      | 7574.60352   | 273.54688    | 50.0343 |

Totals : 1.51388e4 738.26544

=====  
\*\*\* End of Report \*\*\*

**Supplementary Figure 167. HPLC data of 6I**

Data File F:\DATA\JFENG\DATA\BXF-2-57(AD,20%,1.0).D  
Sample Name: BXF-2-57(AD,20%,1.0)

=====  
Acq. Operator :  
Sample Operator :  
Acq. Instrument : LC1260 Location : 1  
Injection Date : 23/09/2019 22:03:11 Inj Volume : No inj  
Acq. Method : C:\Chem32\1\Methods\DEF\_LC.M  
Last changed : 23/09/2019 20:34:31 by  
(modified after loading)  
Analysis Method : F:\METHOD\ZK.M  
Last changed : 14/07/2019 15:34:15 by  
Additional Info : Peak(s) manually integrated

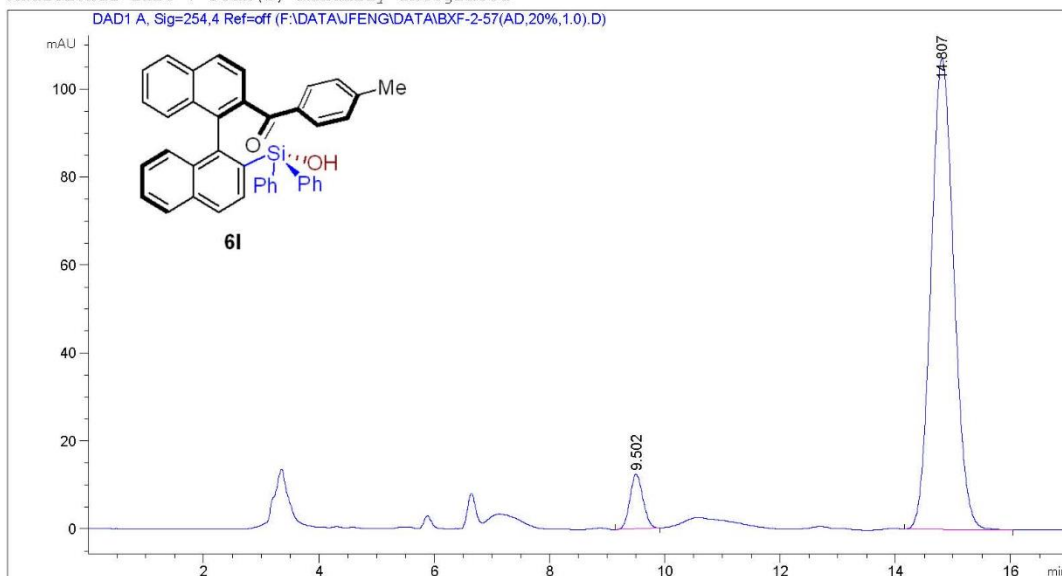

=====  
Area Percent Report  
=====

Sorted By : Signal  
Multiplier : 1.0000  
Dilution : 1.0000  
Use Multiplier & Dilution Factor with ISTDs

Signal 1: DAD1 A, Sig=254,4 Ref=off

| Peak # | RetTime [min] | Type | Width [min] | Area [mAU*s] | Height [mAU] | Area %  |
|--------|---------------|------|-------------|--------------|--------------|---------|
| 1      | 9.502         | BB   | 0.2424      | 194.62357    | 12.44700     | 6.2040  |
| 2      | 14.807        | BB   | 0.4286      | 2942.44897   | 107.06157    | 93.7960 |

Totals : 3137.07254 119.50857

**Supplementary Figure 168. HPLC data of 6I**

Data File F:\DATA\JFENG\DATA\LN-1-7(AD,20%,1.0).D  
Sample Name: LN-1-7(AD,20%,1.0)

=====  
Acq. Operator :  
Sample Operator :  
Acq. Instrument : LC1260 Location : 1  
Injection Date : 20/09/2019 20:40:05 Inj Volume : No inj  
Acq. Method : C:\Chem32\1\Methods\DEF\_LC.M  
Last changed : 20/09/2019 20:00:32 by  
(modified after loading)  
Analysis Method : F:\METHOD\ZK.M  
Last changed : 14/07/2019 15:34:15 by  
Additional Info : Peak(s) manually integrated

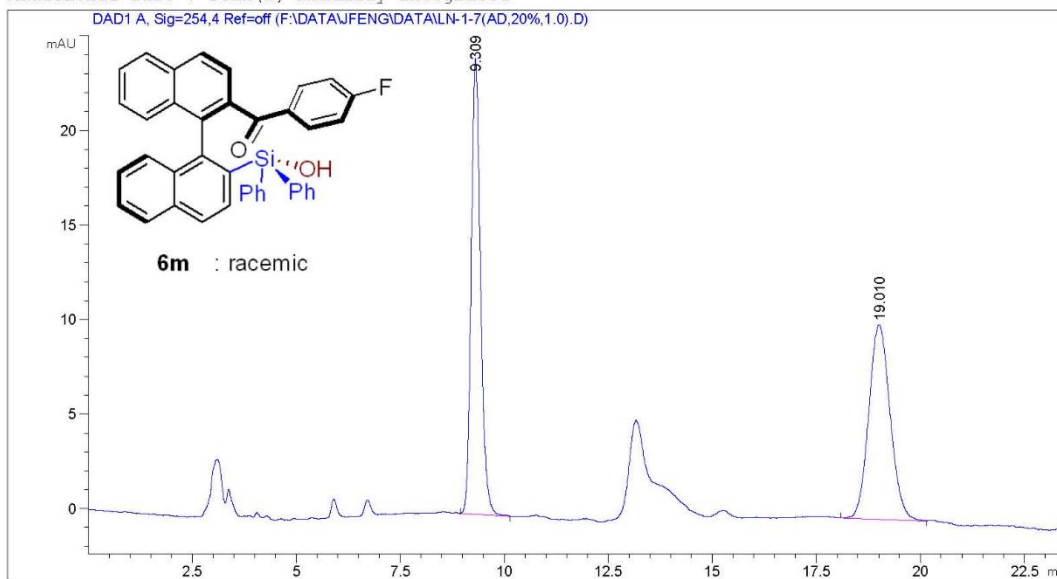

=====  
Area Percent Report  
=====

Sorted By : Signal  
Multiplier : 1.0000  
Dilution : 1.0000  
Use Multiplier & Dilution Factor with ISTDs

Signal 1: DAD1 A, Sig=254,4 Ref=off

| Peak # | RetTime [min] | Type | Width [min] | Area [mAU*s] | Height [mAU] | Area %  |
|--------|---------------|------|-------------|--------------|--------------|---------|
| 1      | 9.309         | BB   | 0.2391      | 373.89233    | 24.08443     | 50.5058 |
| 2      | 19.010        | BB   | 0.5490      | 366.40375    | 10.30097     | 49.4942 |

Totals : 740.29608 34.38540

**Supplementary Figure 169. HPLC data of 6m**



Data File F:\DATA\JFENG\DATA\BXF-2-56-1(AD,20%,1.0).D  
Sample Name: BXF-2-56-1(AD,20%,1.0)

=====  
Acq. Operator :  
Sample Operator :  
Acq. Instrument : LC1260 Location : 1  
Injection Date : 27/09/2019 21:12:03 Inj Volume : No inj  
Acq. Method : C:\Chem32\1\Methods\DEF\_LC.M  
Last changed : 27/09/2019 19:56:02 by  
(modified after loading)  
Analysis Method : F:\METHOD\ZK.M  
Last changed : 14/07/2019 15:34:15 by  
Additional Info : Peak(s) manually integrated

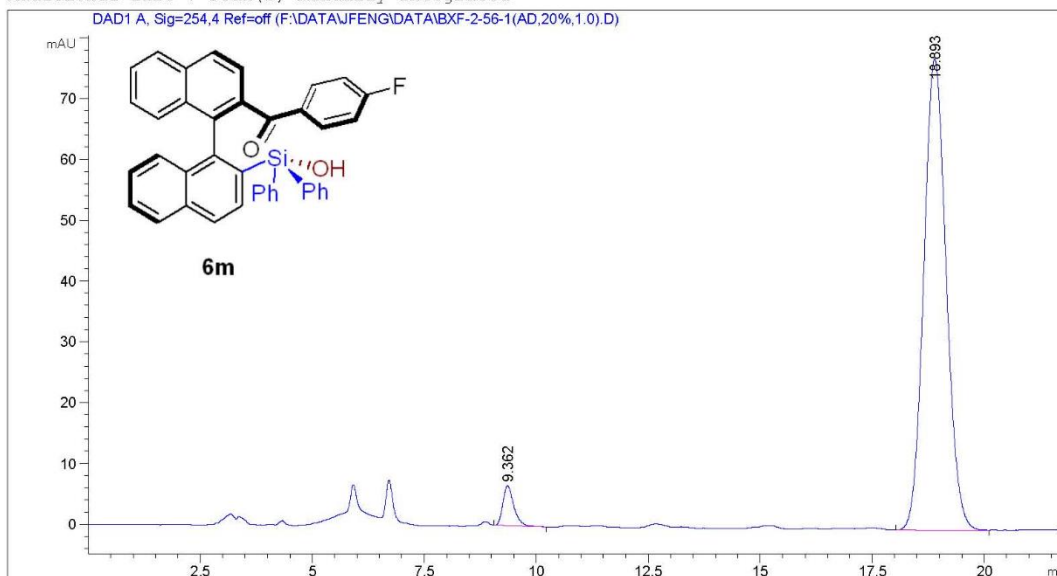

=====  
Area Percent Report  
=====

Sorted By : Signal  
Multiplier : 1.0000  
Dilution : 1.0000  
Use Multiplier & Dilution Factor with ISTDs

Signal 1: DAD1 A, Sig=254,4 Ref=off

| Peak # | RetTime [min] | Type | Width [min] | Area [mAU*s] | Height [mAU] | Area %  |
|--------|---------------|------|-------------|--------------|--------------|---------|
| 1      | 9.362         | BB   | 0.2590      | 110.51694    | 6.54432      | 3.9392  |
| 2      | 18.893        | BB   | 0.5395      | 2695.06079   | 77.54342     | 96.0608 |

Totals : 2805.57773 84.08773

**Supplementary Figure 170. HPLC data of 6m**

Data File F:\DATA\JFENG\DATA\BXF-2-106(AD,20%,1.0).D  
Sample Name: BXF-2-106(AD,20%,1.0)

=====  
Acq. Operator :  
Sample Operator :  
Acq. Instrument : LC1260 Location : 1  
Injection Date : 23/10/2019 20:58:57 Inj Volume : No inj  
Acq. Method : C:\Chem32\1\Methods\DEF\_LC.M  
Last changed : 23/10/2019 20:50:34 by  
(modified after loading)  
Analysis Method : F\METHOD\ZK.M  
Last changed : 14/07/2019 15:34:15 by  
Additional Info : Peak(s) manually integrated

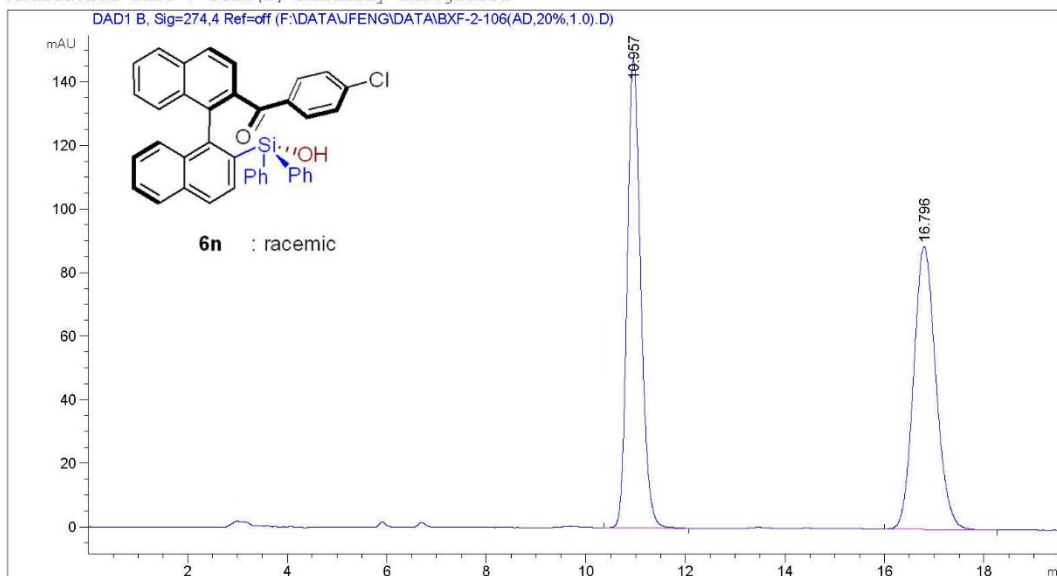

=====  
Area Percent Report  
=====

Sorted By : Signal  
Multiplier : 1.0000  
Dilution : 1.0000  
Use Multiplier & Dilution Factor with ISTDs

Signal 1: DAD1 B, Sig=274,4 Ref=off

| Peak # | RetTime [min] | Type | Width [min] | Area [mAU*s] | Height [mAU] | Area %  |
|--------|---------------|------|-------------|--------------|--------------|---------|
| 1      | 10.957        | BB   | 0.2869      | 2769.13013   | 147.61443    | 50.0165 |
| 2      | 16.796        | BB   | 0.4811      | 2767.30737   | 88.92298     | 49.9835 |

Totals : 5536.43750 236.53741

**Supplementary Figure 171. HPLC data of 6n**

Data File F:\DATA\JFENG\DATA\BXF-2-101(AD,20%,1.0).D  
Sample Name: BXF-2-101(AD,20%,1.0)

=====  
Acq. Operator : Location : 1  
Injection Date : 23/10/2019 21:27:47  
Acq. Method : DEF\_LC.M  
Analysis Method : F:\METHOD\ZK.M  
Last changed : 14/07/2019 15:34:15 by  
Additional Info : Peak(s) manually integrated

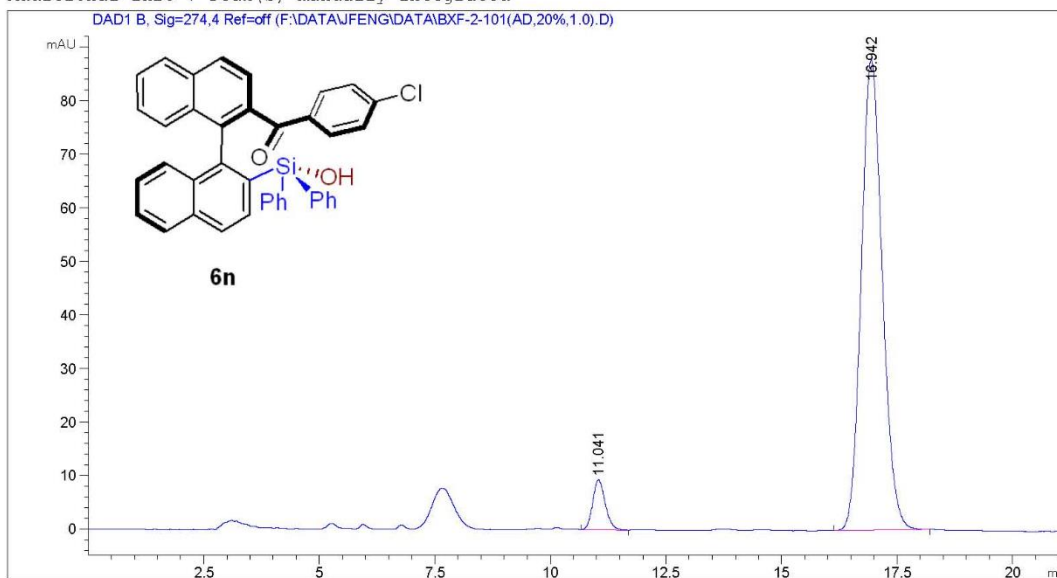

=====  
Area Percent Report  
=====

Sorted By : Signal  
Multiplier : 1.0000  
Dilution : 1.0000  
Use Multiplier & Dilution Factor with ISTDs

Signal 1: DAD1 B, Sig=274,4 Ref=off

| Peak # | RetTime [min] | Type | Width [min] | Area [mAU*s] | Height [mAU] | Area %  |
|--------|---------------|------|-------------|--------------|--------------|---------|
| 1      | 11.041        | BB   | 0.2906      | 174.70988    | 9.32589      | 5.9194  |
| 2      | 16.942        | BB   | 0.4908      | 2776.75806   | 87.85071     | 94.0806 |

Totals : 2951.46794 97.17660

=====  
\*\*\* End of Report \*\*\*

**Supplementary Figure 172. HPLC data of 6n**

Data File F:\DATA\JFENG\DATA\FJ-10-124-2(AD,20%,1.0).D  
Sample Name: FJ-10-124-2(AD,20%,1.0)

=====  
Acq. Operator : Location : 1  
Injection Date : 12/07/2019 17:51:20  
Acq. Method : DEF\_LC.M  
Analysis Method : F:\METHOD\ZK.M  
Last changed : 14/07/2019 15:34:15 by  
Additional Info : Peak(s) manually integrated

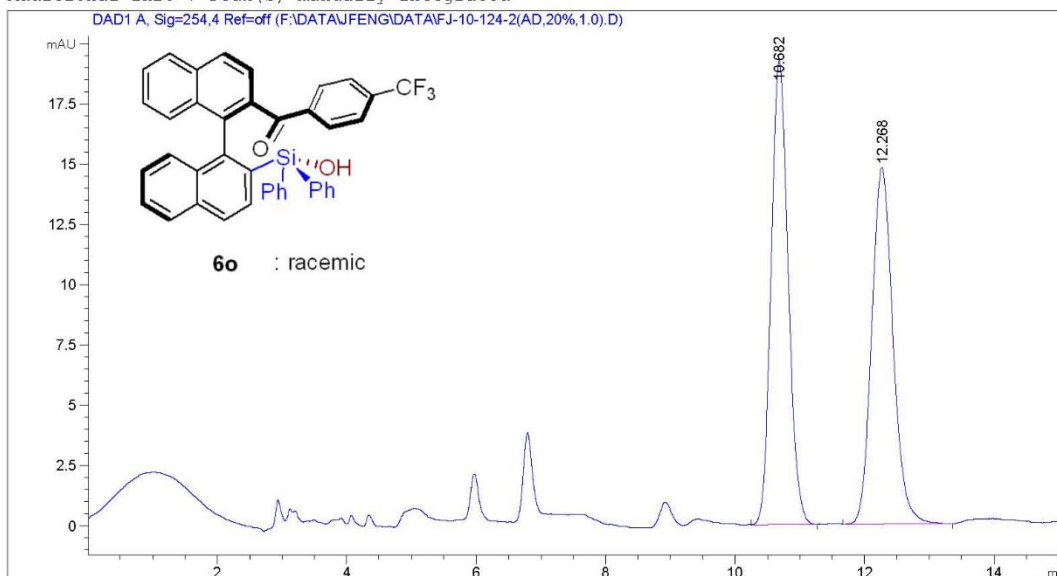

=====  
Area Percent Report  
=====

Sorted By : Signal  
Multiplier : 1.0000  
Dilution : 1.0000  
Use Multiplier & Dilution Factor with ISTDs

Signal 1: DAD1 A, Sig=254,4 Ref=off

| Peak # | RetTime [min] | Type | Width [min] | Area [mAU*s] | Height [mAU] | Area %  |
|--------|---------------|------|-------------|--------------|--------------|---------|
| 1      | 10.682        | BB   | 0.2819      | 349.90295    | 19.26788     | 50.9608 |
| 2      | 12.268        | BB   | 0.3499      | 336.70950    | 14.77239     | 49.0392 |

Totals : 686.61246 34.04027

=====  
\*\*\* End of Report \*\*\*

**Supplementary Figure 173. HPLC data of 6o**

=====  
Acq. Operator :  
Sample Operator :  
Acq. Instrument : LC1260 Location : 1  
Injection Date : 16/07/2019 12:19:17 Inj Volume : No inj  
Acq. Method : C:\Chem32\1\Methods\DEF\_LC.M  
Last changed : 16/07/2019 11:46:04 by  
(modified after loading)  
Analysis Method : F:\METHOD\ZK.M  
Last changed : 14/07/2019 15:34:15 by  
Additional Info : Peak(s) manually integrated

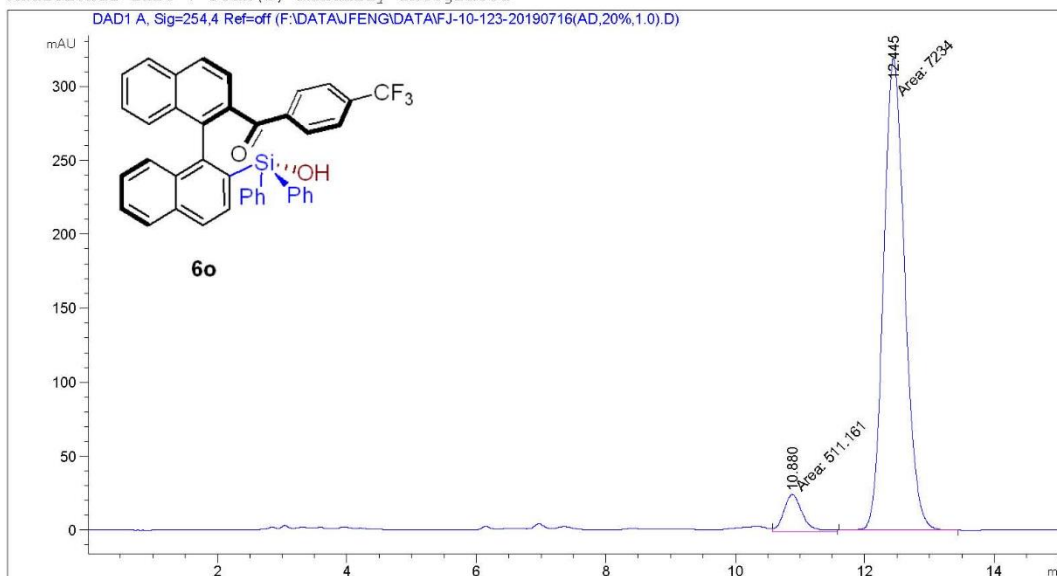

=====  
Area Percent Report  
=====

Sorted By : Signal  
Multiplier : 1.0000  
Dilution : 1.0000  
Use Multiplier & Dilution Factor with ISTDs

Signal 1: DAD1 A, Sig=254,4 Ref=off

| Peak # | RetTime [min] | Type | Width [min] | Area [mAU*s] | Height [mAU] | Area %  |
|--------|---------------|------|-------------|--------------|--------------|---------|
| 1      | 10.880        | MM   | 0.3366      | 511.16074    | 25.30775     | 6.5997  |
| 2      | 12.445        | MM   | 0.3784      | 7234.00195   | 318.59116    | 93.4003 |

Totals : 7745.16269 343.89891

**Supplementary Figure 174. HPLC data of 6o**

Data File F:\DATA\JFENG\DATA\BXF-2-91(AD,80%,1.0).D  
 Sample Name: BXF-2-91(AD,80%,1.0)

```

=====
Acq. Operator   :
Sample Operator :
Acq. Instrument : LC1260                      Location : 1
Injection Date  : 16/10/2019 20:12:06        Inj Volume : No inj

Acq. Method     : F:\METHOD\ZK.M
Last changed    : 16/10/2019 19:31:05 by
                  (modified after loading)
Analysis Method : F:\METHOD\ZK.M
Last changed    : 14/07/2019 15:34:15 by
Additional Info  : Peak(s) manually integrated
  
```

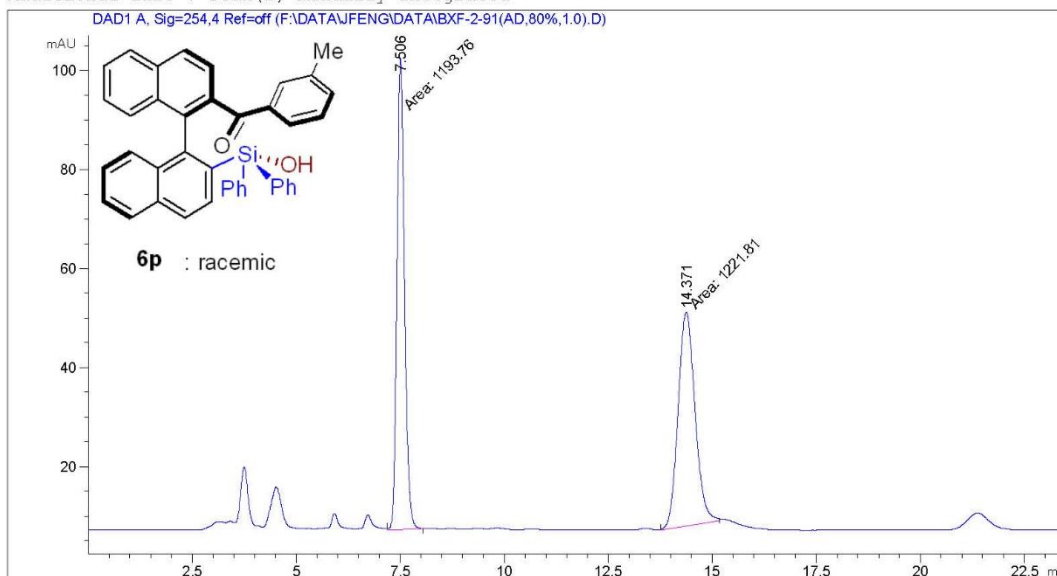

Area Percent Report

```

=====
Sorted By      : Signal
Multiplier     : 1.0000
Dilution       : 1.0000
Use Multiplier & Dilution Factor with ISTDs
  
```

Signal 1: DAD1 A, Sig=254,4 Ref=off

| Peak # | RetTime [min] | Type | Width [min] | Area [mAU*s] | Height [mAU] | Area %  |
|--------|---------------|------|-------------|--------------|--------------|---------|
| 1      | 7.506         | MM   | 0.2091      | 1193.75562   | 95.14936     | 49.4194 |
| 2      | 14.371        | MM   | 0.4715      | 1221.80725   | 43.18851     | 50.5806 |

Totals : 2415.56287 138.33787

**Supplementary Figure 175. HPLC data of 6p**

=====  
Acq. Operator :  
Sample Operator :  
Acq. Instrument : LC1260 Location : 1  
Injection Date : 16/10/2019 20:42:01 Inj Volume : No inj  
Acq. Method : F:\METHOD\ZK.M  
Last changed : 16/10/2019 19:31:05 by  
(modified after loading)  
Analysis Method : F:\METHOD\ZK.M  
Last changed : 14/07/2019 15:34:15 by  
Additional Info : Peak(s) manually integrated

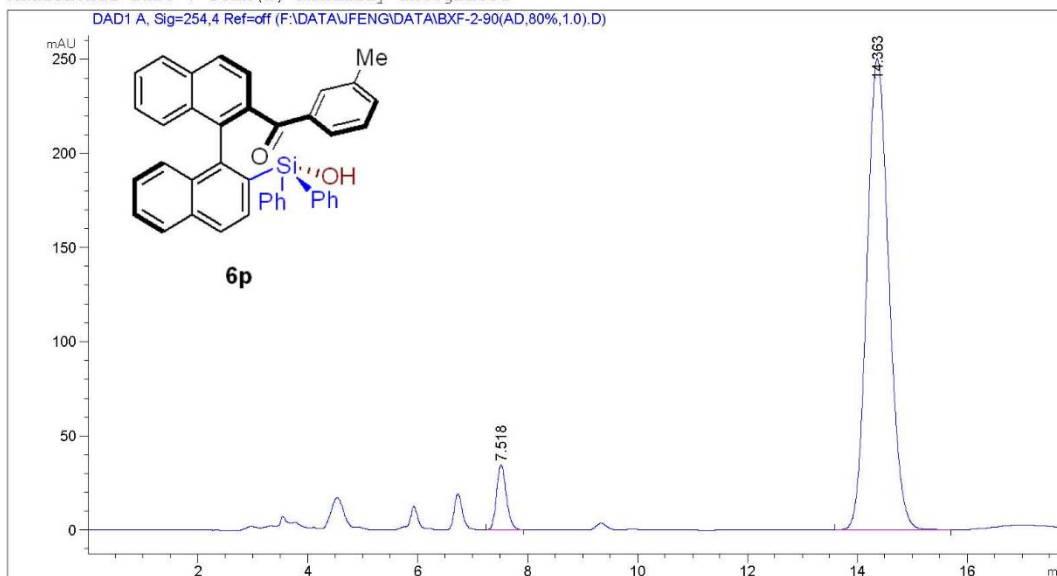

=====  
Area Percent Report  
=====

Sorted By : Signal  
Multiplier : 1.0000  
Dilution : 1.0000  
Use Multiplier & Dilution Factor with ISTDs

Signal 1: DAD1 A, Sig=254,4 Ref=off

| Peak # | RetTime [min] | Type | Width [min] | Area [mAU*s] | Height [mAU] | Area %  |
|--------|---------------|------|-------------|--------------|--------------|---------|
| 1      | 7.518         | BB   | 0.1887      | 421.23117    | 34.44719     | 5.7475  |
| 2      | 14.363        | BB   | 0.4302      | 6907.75732   | 250.14508    | 94.2525 |

Totals : 7328.98849 284.59227

**Supplementary Figure 176. HPLC data of 6p**



=====  
Acq. Operator :  
Sample Operator :  
Acq. Instrument : LC1260 Location : 1  
Injection Date : 19/11/2019 12:46:43 Inj Volume : Manually  
Acq. Method : F:\METHOD\JFeng.M  
Last changed : 19/11/2019 12:39:30 by  
(modified after loading)  
Analysis Method : F:\METHOD\ZK.M  
Last changed : 14/07/2019 15:34:15 by  
Additional Info : Peak(s) manually integrated

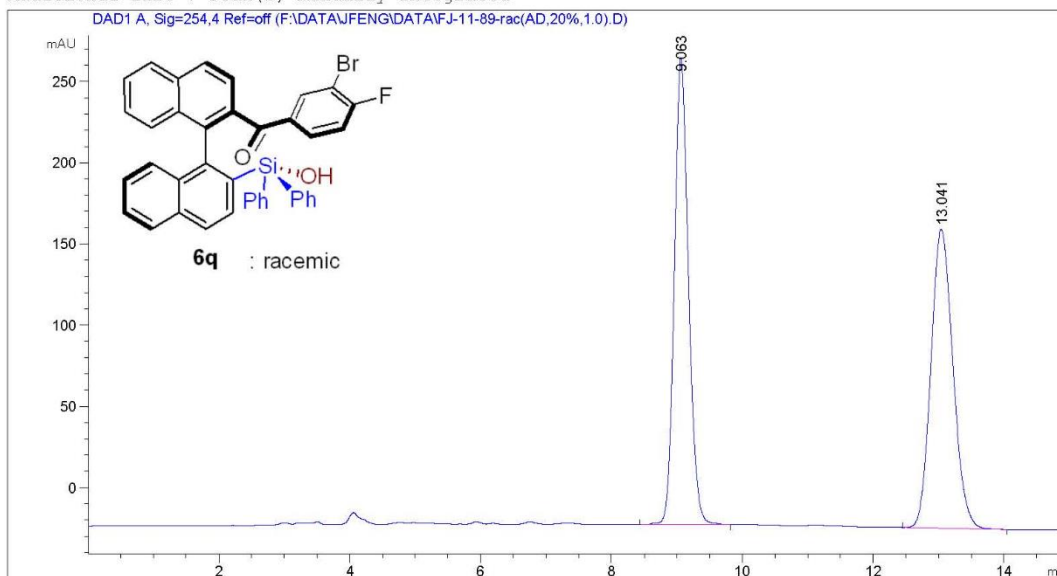

=====  
Area Percent Report  
=====

Sorted By : Signal  
Multiplier : 1.0000  
Dilution : 1.0000  
Use Multiplier & Dilution Factor with ISTDs

Signal 1: DAD1 A, Sig=254,4 Ref=off

| Peak # | RetTime [min] | Type | Width [min] | Area [mAU*s] | Height [mAU] | Area %  |
|--------|---------------|------|-------------|--------------|--------------|---------|
| 1      | 9.063         | BB   | 0.2313      | 4314.06885   | 287.03632    | 50.1311 |
| 2      | 13.041        | BB   | 0.3617      | 4291.50488   | 184.24858    | 49.8689 |

Totals : 8605.57373 471.28490

**Supplementary Figure 177. HPLC data of 6q**



=====  
Acq. Operator : Location : 1  
Injection Date : 19/11/2019 13:04:23  
Acq. Method : JFeng.M  
Analysis Method : F:\METHOD\ZK.M  
Last changed : 14/07/2019 15:34:15 by  
Additional Info : Peak(s) manually integrated

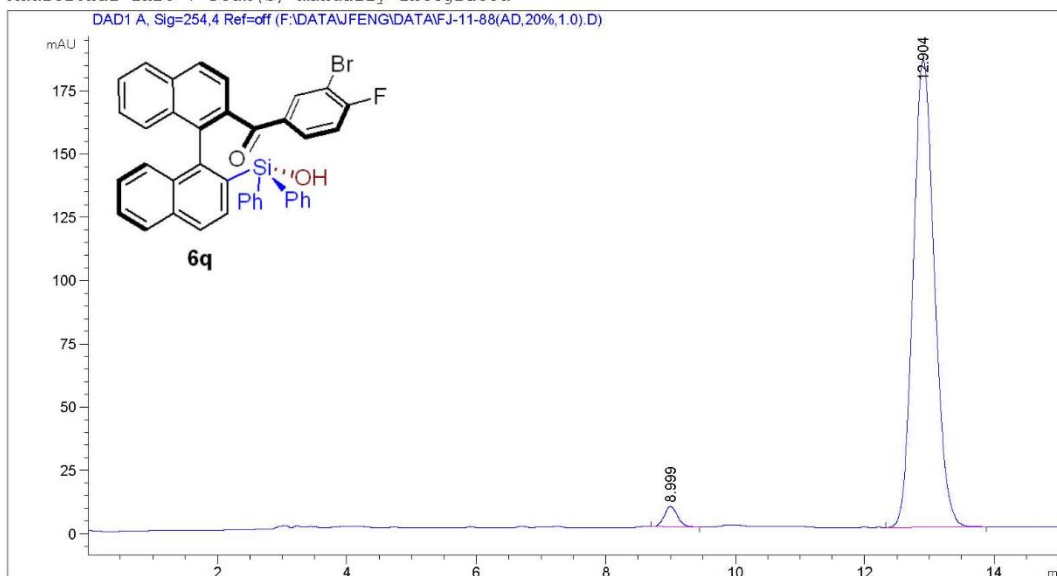

=====  
Area Percent Report  
=====

Sorted By : Signal  
Multiplier : 1.0000  
Dilution : 1.0000  
Use Multiplier & Dilution Factor with ISTDs

Signal 1: DAD1 A, Sig=254,4 Ref=off

| Peak # | RetTime [min] | Type | Width [min] | Area [mAU*s] | Height [mAU] | Area %  |
|--------|---------------|------|-------------|--------------|--------------|---------|
| 1      | 8.999         | BB   | 0.2216      | 114.54284    | 7.97432      | 2.6437  |
| 2      | 12.904        | BB   | 0.3544      | 4218.12646   | 184.70149    | 97.3563 |

Totals : 4332.66930 192.67582

=====  
\*\*\* End of Report \*\*\*

Data File F:\DATA\JFENG\DATA\FJ-11-75 (AD,20%,1.0).D  
Sample Name: FJ-11-75 (AD,20%,1.0)

=====  
Acq. Operator :  
Sample Operator :  
Acq. Instrument : LC1260 Location : 1  
Injection Date : 14/11/2019 20:11:16 Inj Volume : No inj  
Acq. Method : C:\Chem32\1\Methods\DEF\_LC.M  
Last changed : 14/11/2019 19:23:26 by  
(modified after loading)  
Analysis Method : F:\METHOD\ZK.M  
Last changed : 14/07/2019 15:34:15 by  
Additional Info : Peak(s) manually integrated

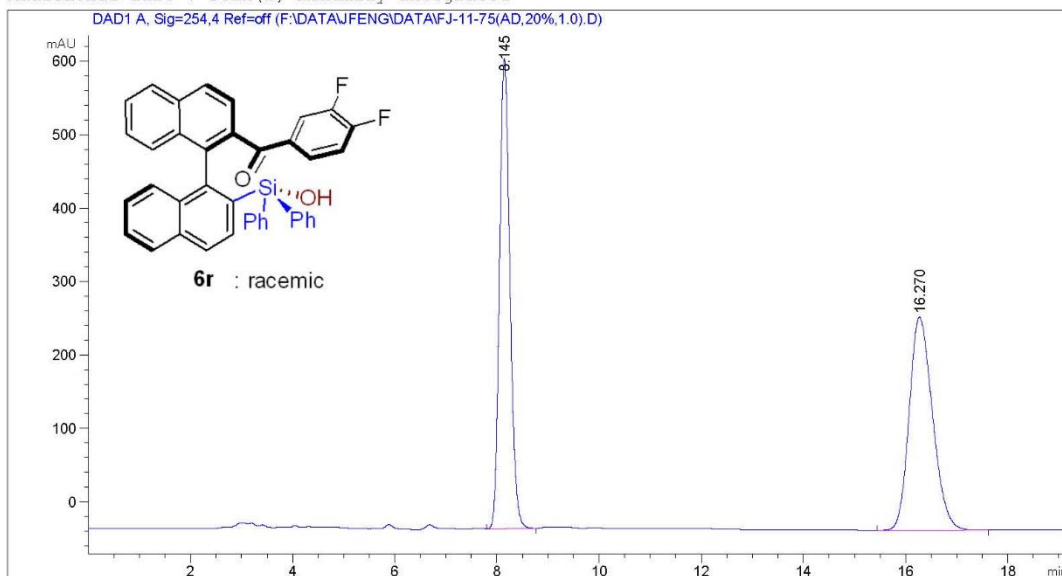

=====  
Area Percent Report  
=====

Sorted By : Signal  
Multiplier : 1.0000  
Dilution : 1.0000  
Use Multiplier & Dilution Factor with ISTDs

Signal 1: DAD1 A, Sig=254,4 Ref=off

| Peak # | RetTime [min] | Type | Width [min] | Area [mAU*s] | Height [mAU] | Area %  |
|--------|---------------|------|-------------|--------------|--------------|---------|
| 1      | 8.145         | BB   | 0.2157      | 8976.04785   | 639.77362    | 49.4325 |
| 2      | 16.270        | BB   | 0.4917      | 9182.15723   | 289.78668    | 50.5675 |

Totals : 1.81582e4 929.56030

**Supplementary Figure 179. HPLC data of 6r**

Data File F:\DATA\JFENG\DATA\FJ-11-74 (AD,20%,1.0).D  
Sample Name: FJ-11-74 (AD,20%,1.0)

=====  
Acq. Operator :  
Sample Operator :  
Acq. Instrument : LC1260 Location : 1  
Injection Date : 14/11/2019 19:50:00 Inj Volume : No inj  
Acq. Method : C:\Chem32\1\Methods\DEF\_LC.M  
Last changed : 14/11/2019 19:23:26 by  
(modified after loading)  
Analysis Method : F:\METHOD\ZK.M  
Last changed : 14/07/2019 15:34:15 by  
Additional Info : Peak(s) manually integrated

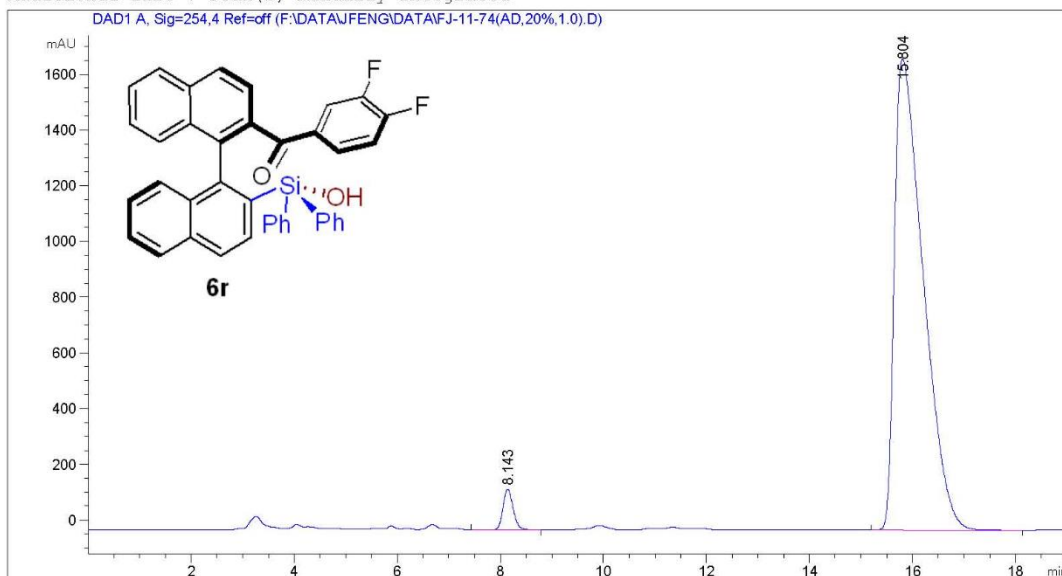

=====  
Area Percent Report  
=====

Sorted By : Signal  
Multiplier : 1.0000  
Dilution : 1.0000  
Use Multiplier & Dilution Factor with ISTDs

Signal 1: DAD1 A, Sig=254,4 Ref=off

| Peak # | RetTime [min] | Type | Width [min] | Area [mAU*s] | Height [mAU] | Area %  |
|--------|---------------|------|-------------|--------------|--------------|---------|
| 1      | 8.143         | VB R | 0.2103      | 1991.21021   | 145.64523    | 2.9667  |
| 2      | 15.804        | BB   | 0.5932      | 6.51272e4    | 1691.38562   | 97.0333 |

Totals : 6.71184e4 1837.03085

**Supplementary Figure 180. HPLC data of 6r**

Data File F:\DATA\JFENG\DATA\FJ-11-34-rac-1(AD,20%,1.0).D  
Sample Name: FJ-11-34-rac-1(AD,20%,1.0)

=====  
Acq. Operator :  
Sample Operator :  
Acq. Instrument : LC1260 Location : 1  
Injection Date : 20/10/2019 11:35:48 Inj Volume : No inj  
Acq. Method : C:\Chem32\1\Methods\DEF\_LC.M  
Last changed : 20/10/2019 11:14:28 by  
(modified after loading)  
Analysis Method : F:\METHOD\ZK.M  
Last changed : 14/07/2019 15:34:15 by  
Additional Info : Peak(s) manually integrated

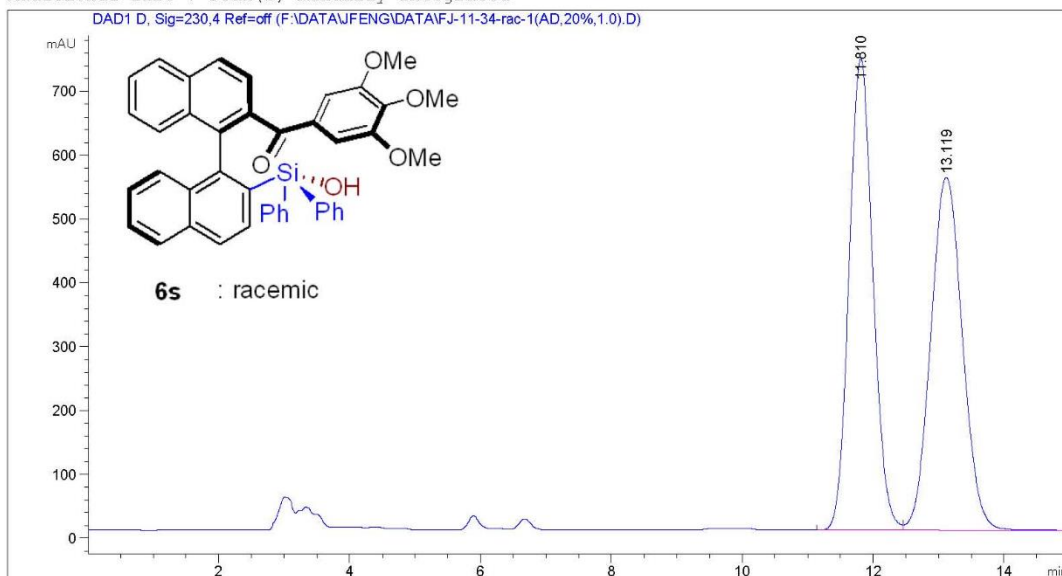

=====  
Area Percent Report  
=====

Sorted By : Signal  
Multiplier : 1.0000  
Dilution : 1.0000  
Use Multiplier & Dilution Factor with ISTDs

Signal 1: DAD1 D, Sig=230,4 Ref=off

| Peak # | RetTime [min] | Type | Width [min] | Area [mAU*s] | Height [mAU] | Area %  |
|--------|---------------|------|-------------|--------------|--------------|---------|
| 1      | 11.810        | BV   | 0.3929      | 1.86599e4    | 738.26306    | 50.2036 |
| 2      | 13.119        | VBA  | 0.5265      | 1.85086e4    | 552.90454    | 49.7964 |

Totals : 3.71685e4 1291.16760

**Supplementary Figure 181. HPLC data of 6s**

Data File F:\DATA\JFENG\DATA\FJ-11-33(AD,20%,1.0).D  
Sample Name: FJ-11-33(AD,20%,1.0)

=====  
Acq. Operator : Location : 1  
Injection Date : 20/10/2019 11:55:00  
Acq. Method : DEF\_LC.M  
Analysis Method : F:\METHOD\ZK.M  
Last changed : 14/07/2019 15:34:15 by  
Additional Info : Peak(s) manually integrated

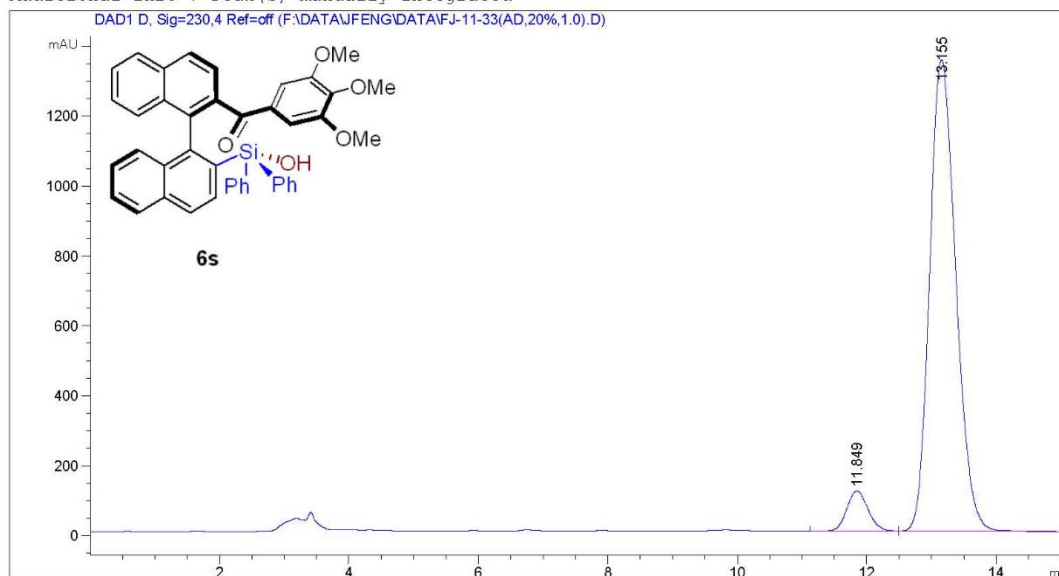

=====  
Area Percent Report  
=====

Sorted By : Signal  
Multiplier : 1.0000  
Dilution : 1.0000  
Use Multiplier & Dilution Factor with ISTDs

Signal 1: DAD1 D, Sig=230,4 Ref=off

| Peak # | RetTime [min] | Type | Width [min] | Area [mAU*s] | Height [mAU] | Area %  |
|--------|---------------|------|-------------|--------------|--------------|---------|
| 1      | 11.849        | BV   | 0.3525      | 2643.01733   | 115.72359    | 6.5381  |
| 2      | 13.155        | VBA  | 0.4349      | 3.77820e4    | 1348.45288   | 93.4619 |

Totals : 4.04250e4 1464.17647

=====  
\*\*\* End of Report \*\*\*

**Supplementary Figure 182. HPLC data of 6s**

Data File F:\DATA\JFENG\DATA\SL-1-21-(AD,20%,1.0).D  
Sample Name: SL-1-21-(AD,20%,1.0)

=====  
Acq. Operator : Location : 1  
Injection Date : 06/11/2019 09:24:35  
Acq. Method : DEF\_LC.M  
Analysis Method : F:\METHOD\ZK.M  
Last changed : 14/07/2019 15:34:15 by  
Additional Info : Peak(s) manually integrated

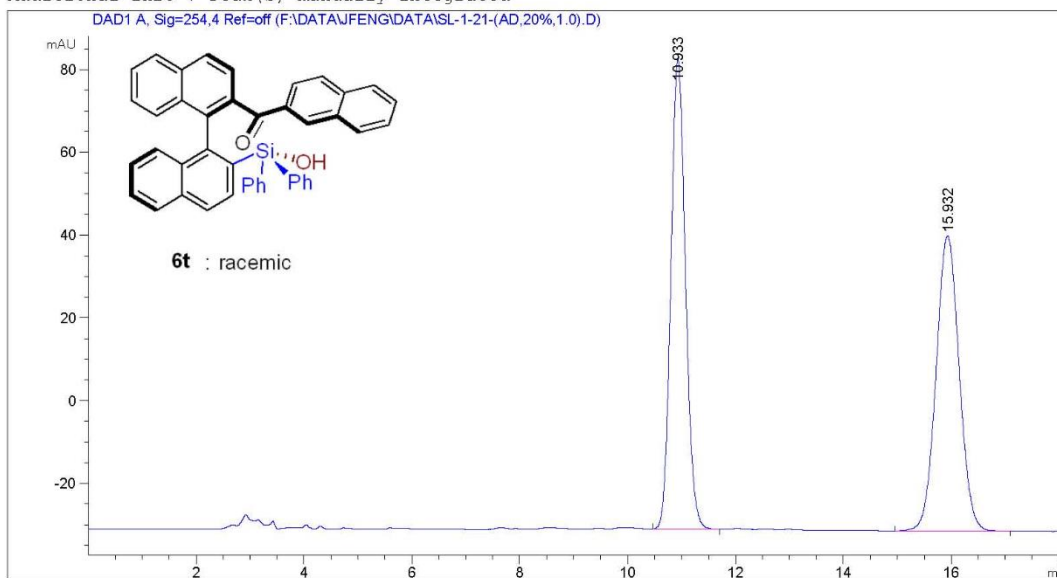

=====  
Area Percent Report  
=====

Sorted By : Signal  
Multiplier : 1.0000  
Dilution : 1.0000  
Use Multiplier & Dilution Factor with ISTDs

Signal 1: DAD1 A, Sig=254,4 Ref=off

| Peak # | RetTime [min] | Type | Width [min] | Area [mAU*s] | Height [mAU] | Area %  |
|--------|---------------|------|-------------|--------------|--------------|---------|
| 1      | 10.933        | BB   | 0.2913      | 2131.81250   | 113.39069    | 50.1496 |
| 2      | 15.932        | BB   | 0.4606      | 2119.09131   | 71.33137     | 49.8504 |

Totals : 4250.90381 184.72206

=====  
\*\*\* End of Report \*\*\*

**Supplementary Figure 183. HPLC data of 6t**

Data File F:\DATA\JFENG\DATA\FJ-11-60-(AD,20%,1.0).D  
Sample Name: FJ-11-60-(AD,20%,1.0)

=====  
Acq. Operator :  
Sample Operator :  
Acq. Instrument : LC1260 Location : 1  
Injection Date : 06/11/2019 09:45:46 Inj Volume : No inj  
Acq. Method : C:\Chem32\1\Methods\DEF\_LC.M  
Last changed : 06/11/2019 09:17:52 by  
(modified after loading)  
Analysis Method : F:\METHOD\ZK.M  
Last changed : 14/07/2019 15:34:15 by  
Additional Info : Peak(s) manually integrated

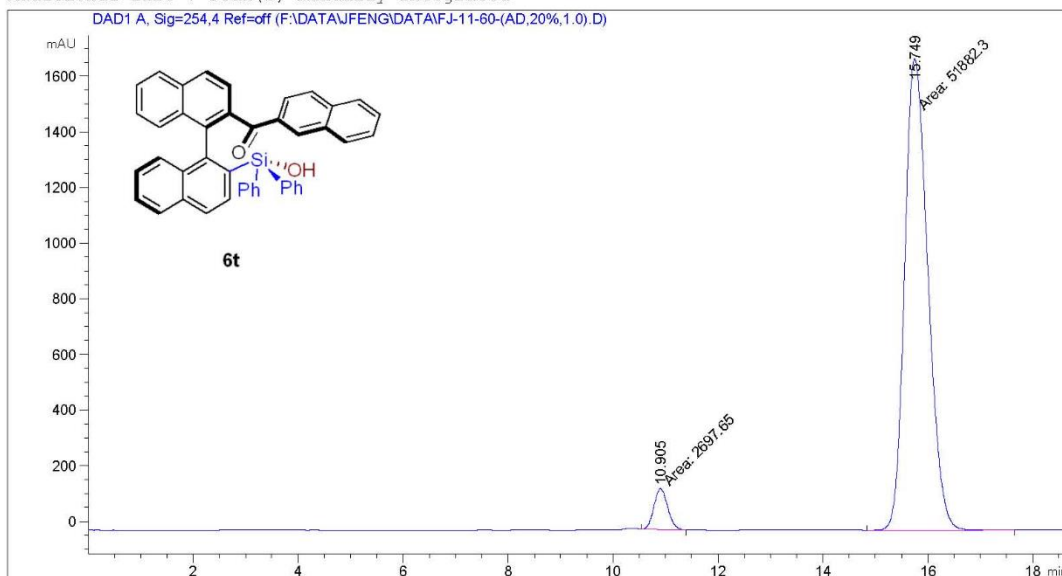

=====  
Area Percent Report  
=====

Sorted By : Signal  
Multiplier : 1.0000  
Dilution : 1.0000  
Use Multiplier & Dilution Factor with ISTDs

Signal 1: DAD1 A, Sig=254,4 Ref=off

| Peak # | RetTime [min] | Type | Width [min] | Area [mAU*s] | Height [mAU] | Area %  |
|--------|---------------|------|-------------|--------------|--------------|---------|
| 1      | 10.905        | MM   | 0.3053      | 2697.65015   | 147.25496    | 4.9426  |
| 2      | 15.749        | MM   | 0.5103      | 5.18823e4    | 1694.41992   | 95.0574 |

Totals : 5.45800e4 1841.67468

**Supplementary Figure 184. HPLC data of 6t**

Data File F:\DATA\JFENG\DATA\FJ-11-70-rac-(AD,20%,1.0).D  
Sample Name: FJ-11-70-rac-(AD,20%,1.0)

=====  
Acq. Operator :  
Sample Operator :  
Acq. Instrument : LC1260 Location : 1  
Injection Date : 10/11/2019 16:06:26 Inj Volume : Manually  
  
Acq. Method : F:\METHOD\JFeng.M  
Last changed : 10/11/2019 15:53:26 by  
(modified after loading)  
Analysis Method : F:\METHOD\ZK.M  
Last changed : 14/07/2019 15:34:15 by  
Additional Info : Peak(s) manually integrated

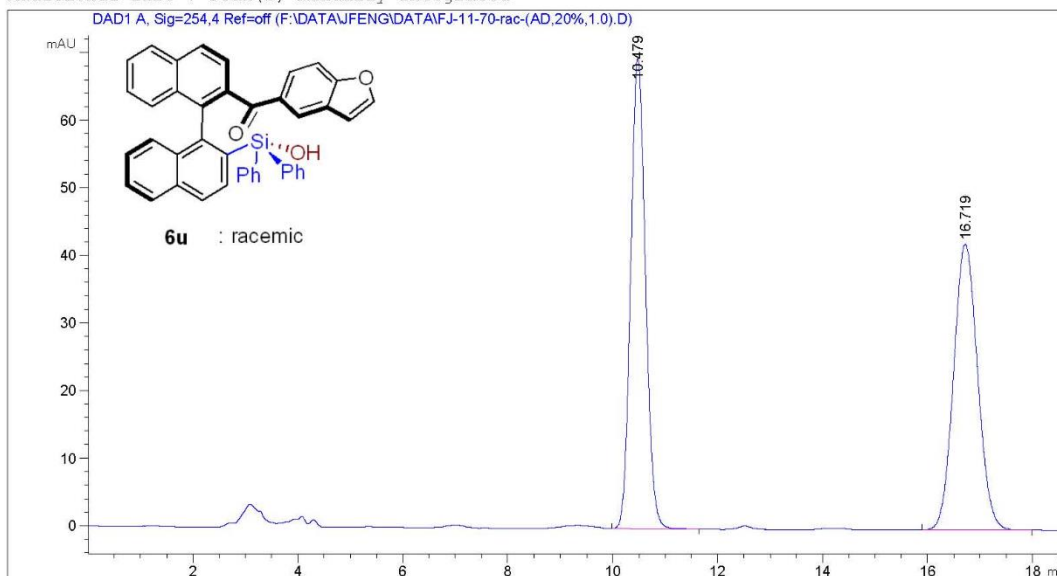

=====  
Area Percent Report  
=====

Sorted By : Signal  
Multiplier : 1.0000  
Dilution : 1.0000  
Use Multiplier & Dilution Factor with ISTDs

Signal 1: DAD1 A, Sig=254,4 Ref=off

| Peak # | RetTime [min] | Type | Width [min] | Area [mAU*s] | Height [mAU] | Area %  |
|--------|---------------|------|-------------|--------------|--------------|---------|
| 1      | 10.479        | BB   | 0.3047      | 1363.57373   | 69.54488     | 50.3445 |
| 2      | 16.719        | BB   | 0.4910      | 1344.91174   | 42.29040     | 49.6555 |

Totals : 2708.48547 111.83528

**Supplementary Figure 185. HPLC data of 6u**



Data File F:\DATA\JFENG\DATA\FJ-11-69(AD,20%,1.0).D  
Sample Name: FJ-11-69(AD,20%,1.0)

=====  
Acq. Operator : Location : 1  
Injection Date : 10/11/2019 16:27:31  
Acq. Method : JFeng.M  
Analysis Method : F:\METHOD\ZK.M  
Last changed : 14/07/2019 15:34:15 by  
Additional Info : Peak(s) manually integrated

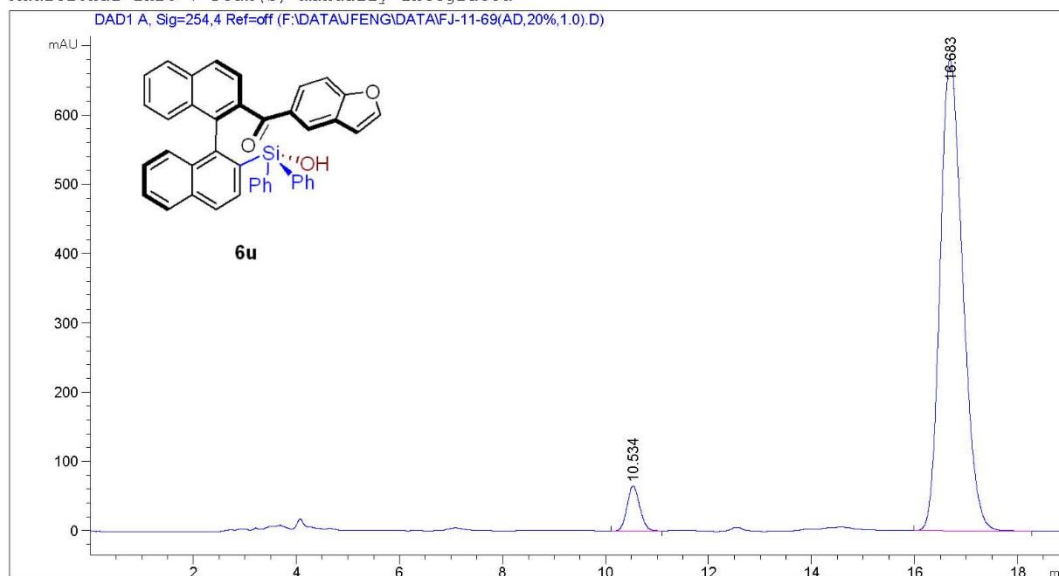

=====  
Area Percent Report  
=====

Sorted By : Signal  
Multiplier : 1.0000  
Dilution : 1.0000  
Use Multiplier & Dilution Factor with ISTDs

Signal 1: DAD1 A, Sig=254,4 Ref=off

| Peak # | RetTime [min] | Type | Width [min] | Area [mAU*s] | Height [mAU] | Area %  |
|--------|---------------|------|-------------|--------------|--------------|---------|
| 1      | 10.534        | BB   | 0.2671      | 1123.68115   | 65.19385     | 5.1705  |
| 2      | 16.683        | BB   | 0.4719      | 2.06087e4    | 679.31561    | 94.8295 |

Totals : 2.17324e4 744.50946

=====  
\*\*\* End of Report \*\*\*

**Supplementary Figure 186. HPLC data of 6u**

Data File F:\DATA\JFENG\DATA\BXF-1-114-rac(AD,8%,1.0).D  
Sample Name: BXF-1-114-rac(AD,8%,1.0)

=====  
Acq. Operator : Location : 1  
Injection Date : 20/04/2019 21:19:28  
Acq. Method : DEF\_LC.M  
Analysis Method : F:\METHOD\ZK.M  
Last changed : 14/07/2019 15:34:15 by  
Additional Info : Peak(s) manually integrated

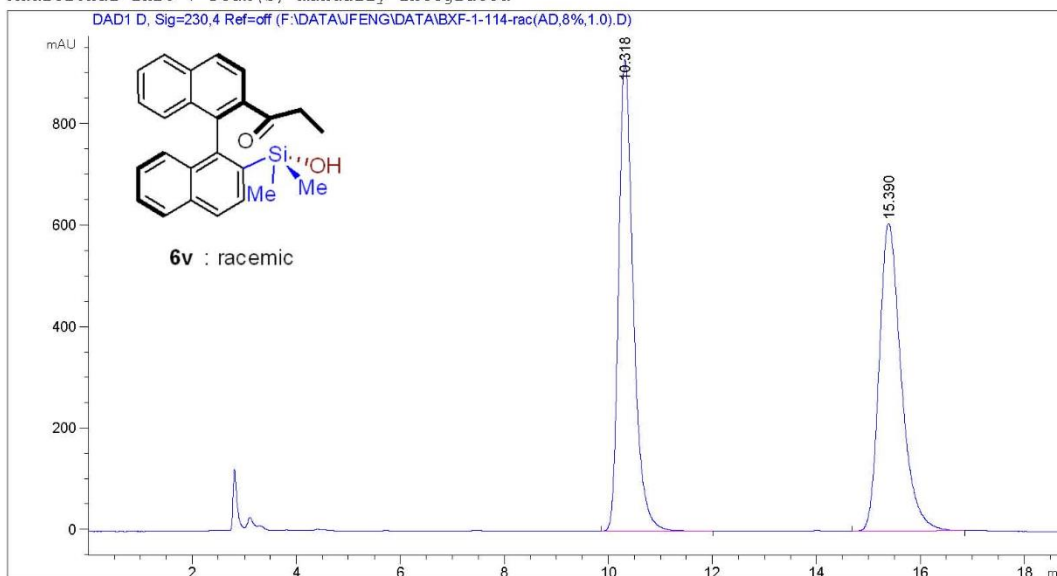

=====  
Area Percent Report  
=====

Sorted By : Signal  
Multiplier : 1.0000  
Dilution : 1.0000  
Use Multiplier & Dilution Factor with ISTDs

Signal 1: DAD1 D, Sig=230,4 Ref=off

| Peak # | RetTime [min] | Type | Width [min] | Area [mAU*s] | Height [mAU] | Area %  |
|--------|---------------|------|-------------|--------------|--------------|---------|
| 1      | 10.318        | BB   | 0.2922      | 1.80134e4    | 929.00806    | 50.3522 |
| 2      | 15.390        | BB   | 0.4500      | 1.77614e4    | 605.96783    | 49.6478 |

Totals : 3.57748e4 1534.97589

=====  
\*\*\* End of Report \*\*\*

**Supplementary Figure 187. HPLC data of 6v**

Data File F:\DATA\JFENG\DATA\FJ-10-83(AD,8%,1.0).D  
Sample Name: FJ-10-83(AD,8%,1.0)

=====  
Acq. Operator :  
Sample Operator :  
Acq. Instrument : LC1260 Location : 1  
Injection Date : 07/06/2019 20:50:03 Inj Volume : Manually  
Acq. Method : F:\METHOD\JFeng.M  
Last changed : 07/06/2019 20:44:23 by  
(modified after loading)  
Analysis Method : F:\METHOD\ZK.M  
Last changed : 14/07/2019 15:34:15 by  
Additional Info : Peak(s) manually integrated

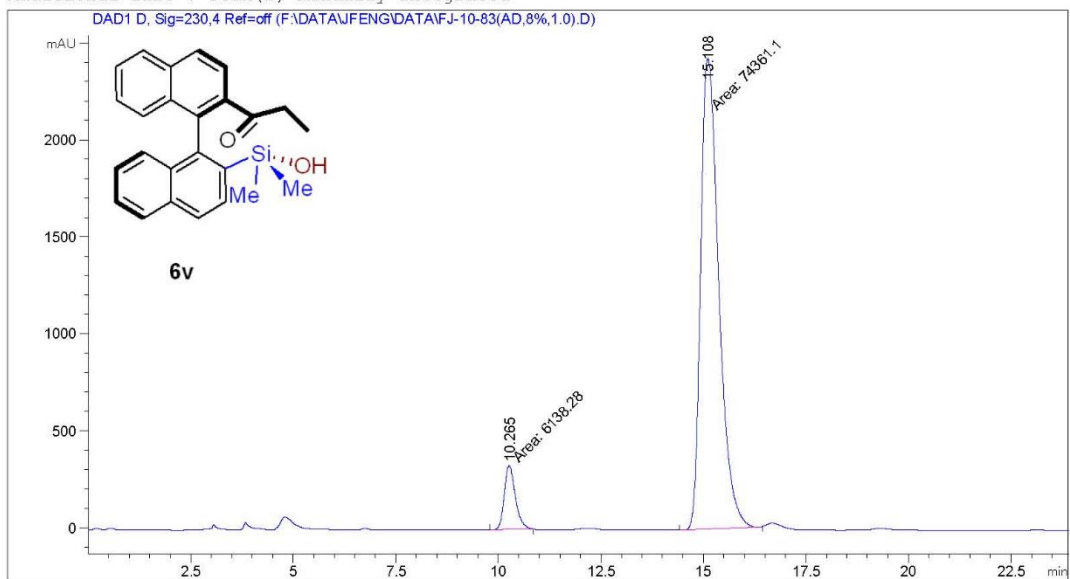

=====  
Area Percent Report  
=====

Sorted By : Signal  
Multiplier : 1.0000  
Dilution : 1.0000  
Use Multiplier & Dilution Factor with ISTDs

Signal 1: DAD1 D, Sig=230,4 Ref=off

| Peak # | RetTime [min] | Type | Width [min] | Area [mAU*s] | Height [mAU] | Area %  |
|--------|---------------|------|-------------|--------------|--------------|---------|
| 1      | 10.265        | MM   | 0.3095      | 6138.28027   | 330.56366    | 7.6253  |
| 2      | 15.108        | MM   | 0.5110      | 7.43611e4    | 2425.25513   | 92.3747 |

Totals : 8.04994e4 2755.81879

**Supplementary Figure 188. HPLC data of 6v**

Data File F:\DATA\JFENG\DATA\FJ-12-157-2-rac-(AD,4%,1.0).D  
Sample Name: FJ-12-157-2-rac-(AD,4%,1.0)

=====  
Acq. Operator : Location : 1  
Injection Date : 12/06/2020 09:34:46  
Acq. Method : JFeng.M  
Analysis Method : C:\Chem32\1\Methods\DEF\_LC.M  
Last changed : 13/02/2014 23:27:44 by SYSTEM  
Additional Info : Peak(s) manually integrated

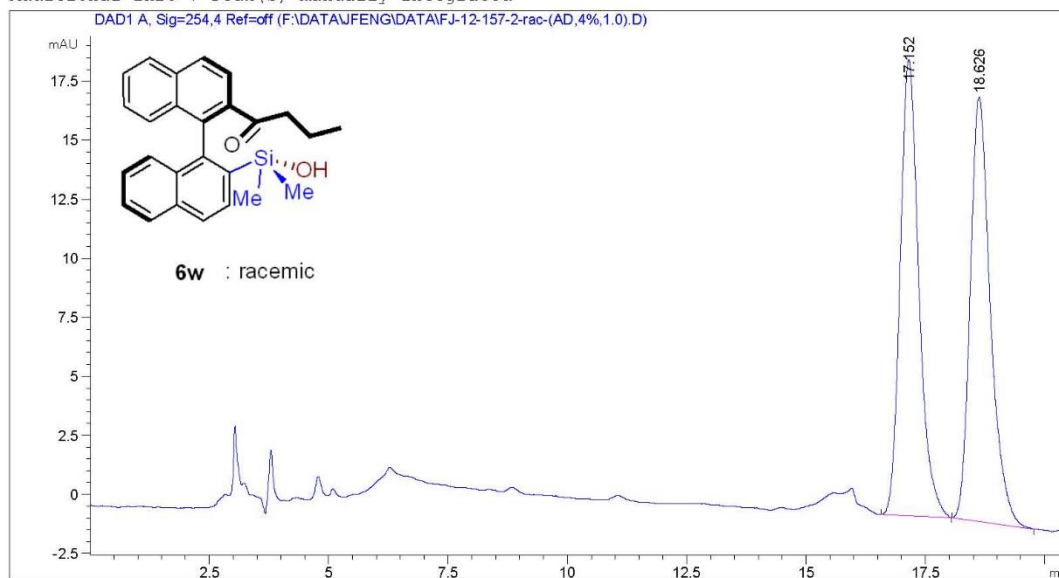

=====  
Area Percent Report  
=====

Sorted By : Signal  
Multiplier : 1.0000  
Dilution : 1.0000  
Use Multiplier & Dilution Factor with ISTDs

Signal 1: DAD1 A, Sig=254,4 Ref=off

| Peak # | RetTime [min] | Type | Width [min] | Area [mAU*s] | Height [mAU] | Area %  |
|--------|---------------|------|-------------|--------------|--------------|---------|
| 1      | 17.152        | BB   | 0.4148      | 524.48938    | 19.31630     | 49.8754 |
| 2      | 18.626        | BB   | 0.4422      | 527.11066    | 17.96947     | 50.1246 |

Totals : 1051.60004 37.28577

=====  
\*\*\* End of Report \*\*\*

**Supplementary Figure 189. HPLC data of 6w**

Data File F:\DATA\JFENG\DATA\FJ-12-161-1-(AD,4%,1.0).D  
Sample Name: FJ-12-161-1-(AD,4%,1.0)

=====  
Acq. Operator : Location : 1  
Injection Date : 12/06/2020 20:02:11  
Acq. Method : JFeng.M  
Analysis Method : C:\Chem32\1\Methods\DEF\_LC.M  
Last changed : 13/02/2014 23:27:44 by SYSTEM  
Additional Info : Peak(s) manually integrated

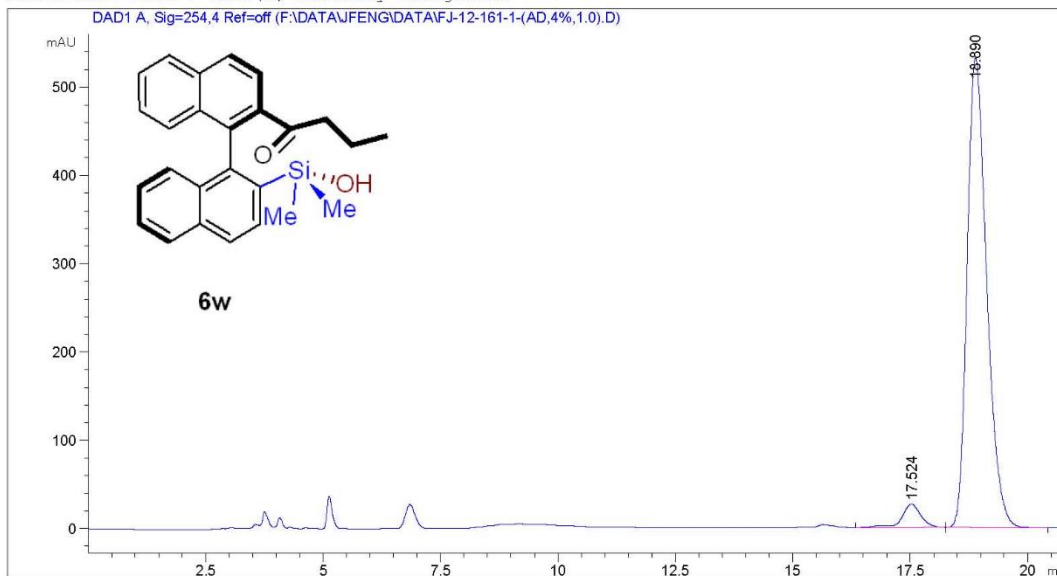

=====  
Area Percent Report  
=====

Sorted By : Signal  
Multiplier : 1.0000  
Dilution : 1.0000  
Use Multiplier & Dilution Factor with ISTDs

Signal 1: DAD1 A, Sig=254,4 Ref=off

| Peak # | RetTime [min] | Type | Width [min] | Area [mAU*s] | Height [mAU] | Area %  |
|--------|---------------|------|-------------|--------------|--------------|---------|
| 1      | 17.524        | BB   | 0.4212      | 747.10229    | 26.47641     | 4.6546  |
| 2      | 18.890        | BB   | 0.4435      | 1.53038e4    | 532.12524    | 95.3454 |

Totals : 1.60509e4 558.60165

=====  
\*\*\* End of Report \*\*\*

**Supplementary Figure 190. HPLC data of 6w**

Data File F:\DATA\JFENG\DATA\FJ-10-191-RAC(AD,20%,1.0).D  
Sample Name: FJ-10-191-RAC(AD,20%,1.0)

=====  
Acq. Operator : Location : 1  
Injection Date : 21/09/2019 17:24:02  
Acq. Method : JFeng.M  
Analysis Method : F:\METHOD\ZK.M  
Last changed : 14/07/2019 15:34:15 by  
Additional Info : Peak(s) manually integrated

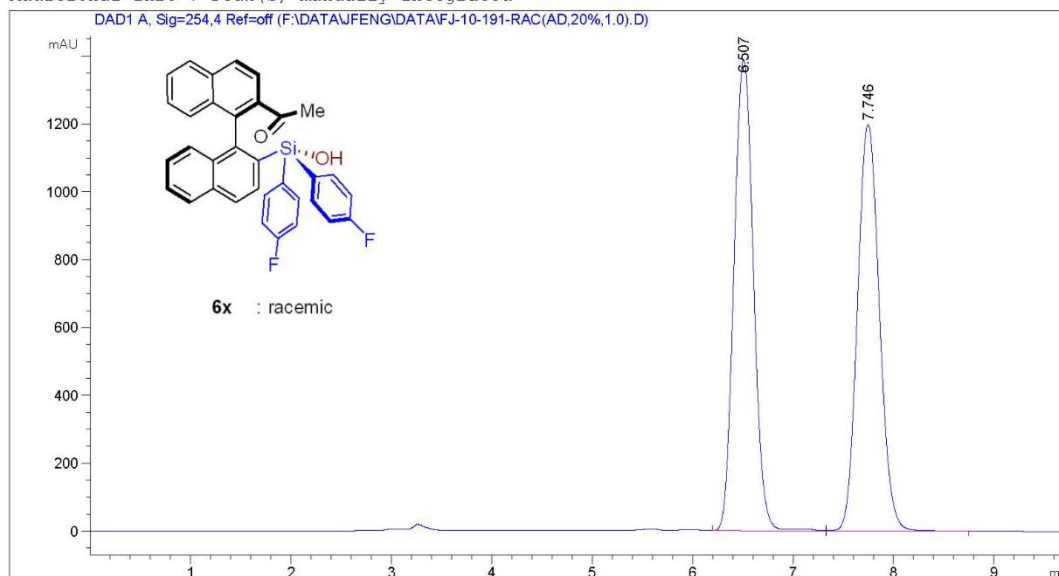

=====  
Area Percent Report  
=====

Sorted By : Signal  
Multiplier : 1.0000  
Dilution : 1.0000  
Use Multiplier & Dilution Factor with ISTDs

Signal 1: DAD1 A, Sig=254,4 Ref=off

| Peak # | RetTime [min] | Type | Width [min] | Area [mAU*s] | Height [mAU] | Area %  |
|--------|---------------|------|-------------|--------------|--------------|---------|
| 1      | 6.507         | BV R | 0.2134      | 1.85975e4    | 1388.39795   | 50.4683 |
| 2      | 7.746         | VB   | 0.2396      | 1.82523e4    | 1198.97424   | 49.5317 |

Totals : 3.68499e4 2587.37219

=====  
\*\*\* End of Report \*\*\*

**Supplementary Figure 191. HPLC data of 6x**

Data File F:\DATA\JFENG\DATA\FJ-10-190 (AD,20%,1.0).D  
Sample Name: FJ-10-190(AD,20%,1.0)

=====  
Acq. Operator : Location : 1  
Injection Date : 21/09/2019 17:35:46  
Acq. Method : JFeng.M  
Analysis Method : F:\METHOD\ZK.M  
Last changed : 14/07/2019 15:34:15 by  
Additional Info : Peak(s) manually integrated

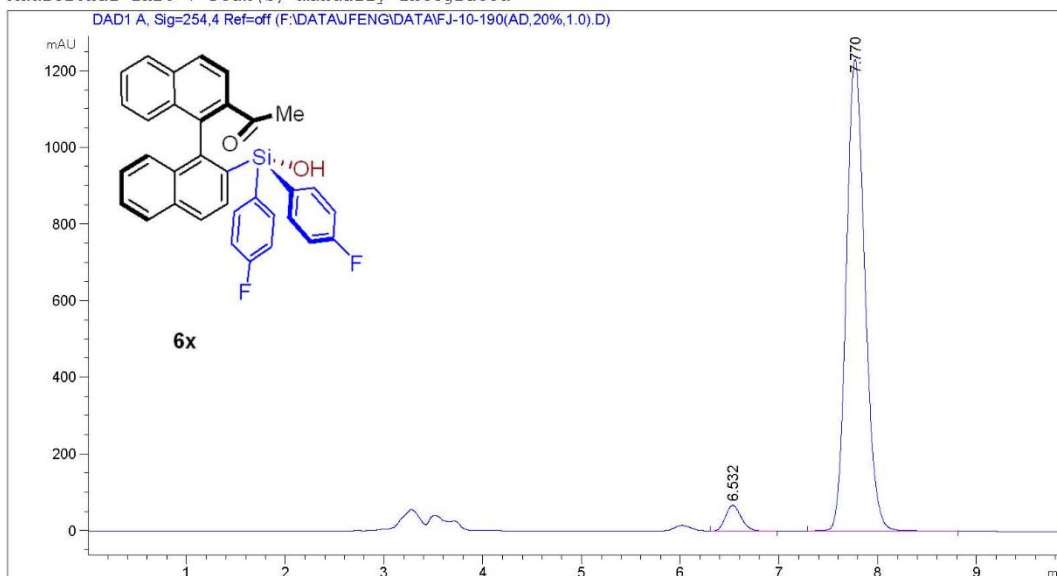

=====  
Area Percent Report  
=====

Sorted By : Signal  
Multiplier : 1.0000  
Dilution : 1.0000  
Use Multiplier & Dilution Factor with ISTDs

Signal 1: DAD1 A, Sig=254,4 Ref=off

| Peak # | RetTime [min] | Type | Width [min] | Area [mAU*s] | Height [mAU] | Area %  |
|--------|---------------|------|-------------|--------------|--------------|---------|
| 1      | 6.532         | VB   | 0.1707      | 746.57880    | 67.67377     | 4.4558  |
| 2      | 7.770         | BB   | 0.2018      | 1.60088e4    | 1230.35925   | 95.5442 |

Totals : 1.67553e4 1298.03302

=====  
\*\*\* End of Report \*\*\*

**Supplementary Figure 192. HPLC data of 6x**

=====  
Acq. Operator :  
Sample Operator :  
Acq. Instrument : LC1260 Location : 1  
Injection Date : 19/09/2019 11:27:22 Inj Volume : No inj  
Acq. Method : C:\Chem32\1\Methods\DEF\_LC.M  
Last changed : 19/09/2019 11:18:37 by  
(modified after loading)  
Analysis Method : F:\METHOD\ZK.M  
Last changed : 14/07/2019 15:34:15 by

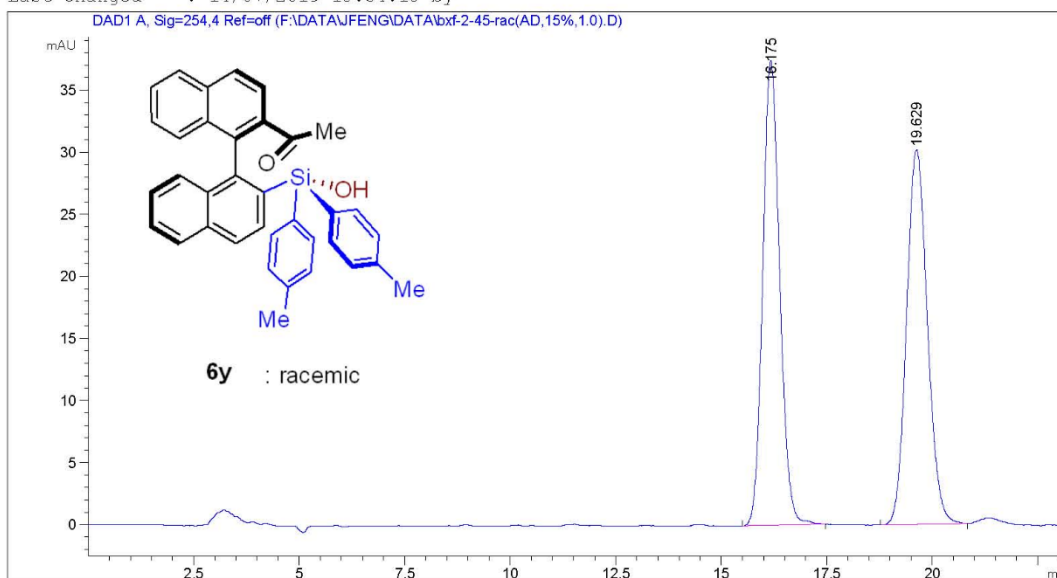

=====  
Area Percent Report  
=====

Sorted By : Signal  
Multiplier : 1.0000  
Dilution : 1.0000  
Use Multiplier & Dilution Factor with ISTDs

Signal 1: DAD1 A, Sig=254,4 Ref=off

| Peak # | RetTime [min] | Type | Width [min] | Area [mAU*s] | Height [mAU] | Area %  |
|--------|---------------|------|-------------|--------------|--------------|---------|
| 1      | 16.175        | BB   | 0.4297      | 1044.59082   | 37.41811     | 50.2386 |
| 2      | 19.629        | BB   | 0.5362      | 1034.66772   | 30.16058     | 49.7614 |

Totals : 2079.25854 67.57869

**Supplementary Figure 193. HPLC data of 6y**



=====  
Acq. Operator : Location : 1  
Injection Date : 19/09/2019 11:55:04  
Acq. Method : DEF\_LC.M  
Analysis Method : F:\METHOD\ZK.M  
Last changed : 14/07/2019 15:34:15 by  
Additional Info : Peak(s) manually integrated

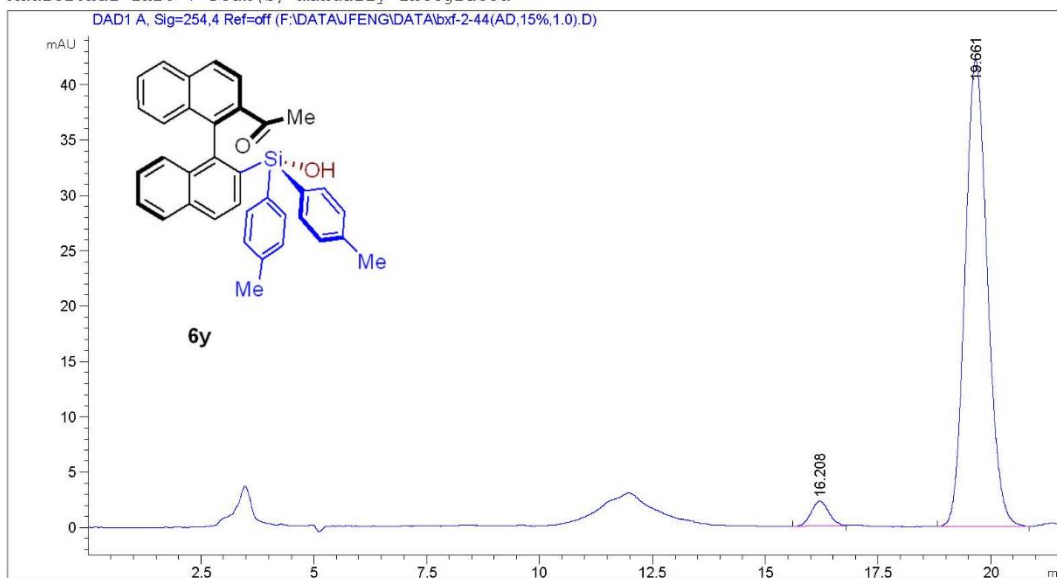

=====  
Area Percent Report  
=====

Sorted By : Signal  
Multiplier : 1.0000  
Dilution : 1.0000  
Use Multiplier & Dilution Factor with ISTDs

Signal 1: DAD1 A, Sig=254,4 Ref=off

| Peak # | RetTime [min] | Type | Width [min] | Area [mAU*s] | Height [mAU] | Area %  |
|--------|---------------|------|-------------|--------------|--------------|---------|
| 1      | 16.208        | BB   | 0.4039      | 60.09991     | 2.23376      | 4.0020  |
| 2      | 19.661        | BB   | 0.5250      | 1441.64819   | 42.14939     | 95.9980 |

Totals : 1501.74810 44.38315

=====  
\*\*\* End of Report \*\*\*

**Supplementary Figure 194. HPLC data of 6y**

Data File F:\DATA\JFENG\DATA\FJ-11-1-rac(AD,20%,1.0).D  
Sample Name: FJ-11-1-rac(AD,20%,1.0)

=====  
Acq. Operator :  
Sample Operator :  
Acq. Instrument : LC1260 Location : 1  
Injection Date : 26/09/2019 09:34:12 Inj Volume : Manually  
  
Acq. Method : F:\METHOD\JFeng.M  
Last changed : 26/09/2019 09:25:34 by  
(modified after loading)  
Analysis Method : F:\METHOD\ZK.M  
Last changed : 14/07/2019 15:34:15 by  
Additional Info : Peak(s) manually integrated

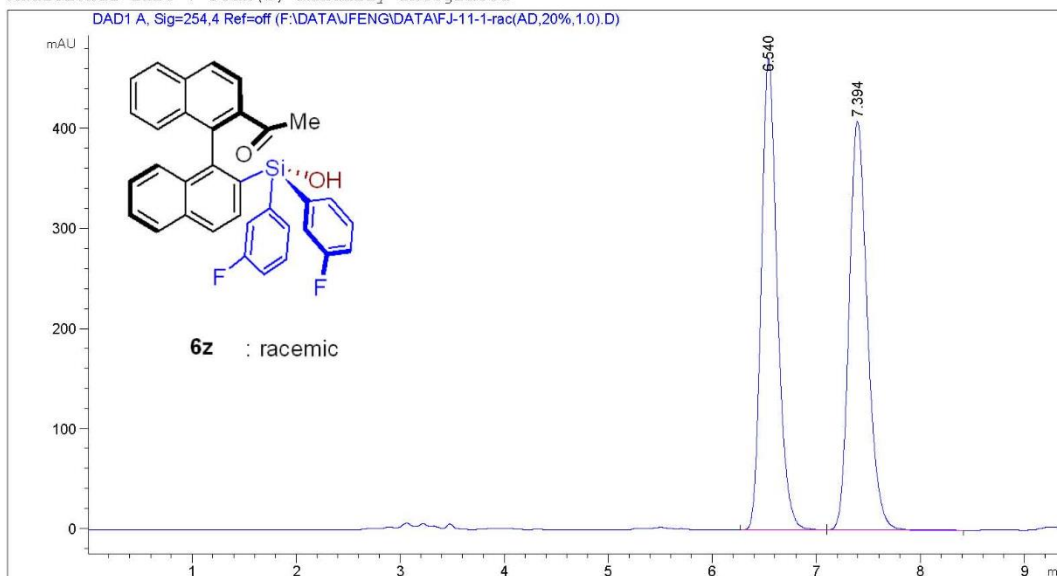

=====  
Area Percent Report  
=====

Sorted By : Signal  
Multiplier : 1.0000  
Dilution : 1.0000  
Use Multiplier & Dilution Factor with ISTDs

Signal 1: DAD1 A, Sig=254,4 Ref=off

| Peak # | RetTime [min] | Type | Width [min] | Area [mAU*s] | Height [mAU] | Area %  |
|--------|---------------|------|-------------|--------------|--------------|---------|
| 1      | 6.540         | BB   | 0.1618      | 5002.84619   | 471.49576    | 50.2093 |
| 2      | 7.394         | BB   | 0.1857      | 4961.13232   | 408.45023    | 49.7907 |

Totals : 9963.97852 879.94598

**Supplementary Figure 195. HPLC data of 6z**

Data File F:\DATA\JFENG\DATA\FJ-10-200 (AD,20%,1.0).D  
Sample Name: FJ-10-200(AD,20%,1.0)

=====  
Acq. Operator :  
Sample Operator :  
Acq. Instrument : LC1260 Location : 1  
Injection Date : 26/09/2019 09:46:10 Inj Volume : Manually  
Acq. Method : F:\METHOD\JFeng.M  
Last changed : 26/09/2019 09:25:34 by  
(modified after loading)  
Analysis Method : F:\METHOD\ZK.M  
Last changed : 14/07/2019 15:34:15 by  
Additional Info : Peak(s) manually integrated

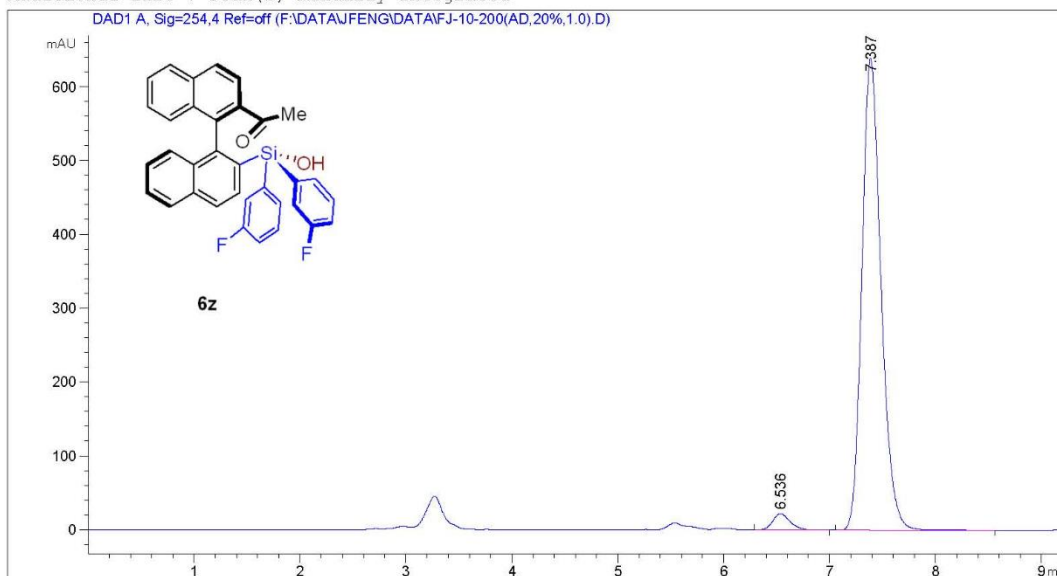

=====  
Area Percent Report  
=====

Sorted By : Signal  
Multiplier : 1.0000  
Dilution : 1.0000  
Use Multiplier & Dilution Factor with ISTDs

Signal 1: DAD1 A, Sig=254,4 Ref=off

| Peak # | RetTime [min] | Type | Width [min] | Area [mAU*s] | Height [mAU] | Area %  |
|--------|---------------|------|-------------|--------------|--------------|---------|
| 1      | 6.536         | BB   | 0.1737      | 251.69478    | 22.29498     | 3.0533  |
| 2      | 7.387         | BB   | 0.1919      | 7991.56152   | 638.95624    | 96.9467 |

Totals : 8243.25630 661.25121

**Supplementary Figure 196. HPLC data of 6z**

Data File F:\DATA\JFENG\DATA\FJ-11-3-rac(AD,20%,1.0).D  
Sample Name: FJ-11-3-rac(AD,20%,1.0)

=====  
Acq. Operator : Location : 1  
Injection Date : 02/10/2019 09:38:27  
Acq. Method : JFeng.M  
Analysis Method : F:\METHOD\ZK.M  
Last changed : 14/07/2019 15:34:15 by  
Additional Info : Peak(s) manually integrated

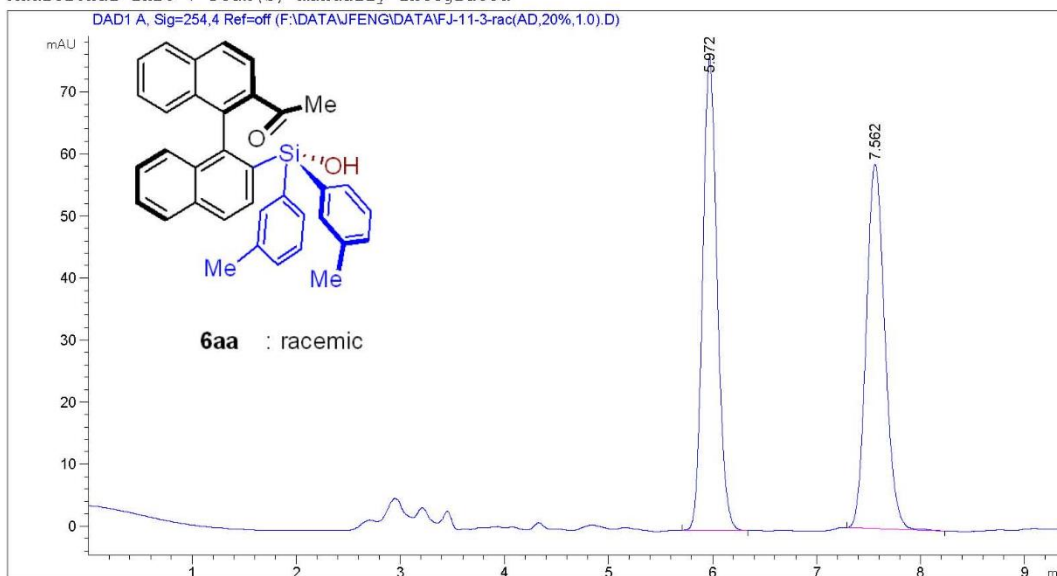

=====  
Area Percent Report  
=====

Sorted By : Signal  
Multiplier : 1.0000  
Dilution : 1.0000  
Use Multiplier & Dilution Factor with ISTDs

Signal 1: DAD1 A, Sig=254,4 Ref=off

| Peak # | RetTime [min] | Type | Width [min] | Area [mAU*s] | Height [mAU] | Area %  |
|--------|---------------|------|-------------|--------------|--------------|---------|
| 1      | 5.972         | BB   | 0.1489      | 734.85309    | 75.92108     | 50.2229 |
| 2      | 7.562         | BB   | 0.1906      | 728.33130    | 58.76814     | 49.7771 |

Totals : 1463.18439 134.68922

=====  
\*\*\* End of Report \*\*\*

**Supplementary Figure 197. HPLC data of 6aa**

Data File F:\DATA\JFENG\DATA\FJ-11-2 (AD,20%,1.0).D  
Sample Name: FJ-11-2 (AD,20%,1.0)

=====  
Acq. Operator :  
Sample Operator :  
Acq. Instrument : LC1260 Location : 1  
Injection Date : 02/10/2019 09:54:34 Inj Volume : Manually  
Acq. Method : F:\METHOD\JFeng.M  
Last changed : 02/10/2019 09:02:21 by  
(modified after loading)  
Analysis Method : F:\METHOD\ZK.M  
Last changed : 14/07/2019 15:34:15 by  
Additional Info : Peak(s) manually integrated

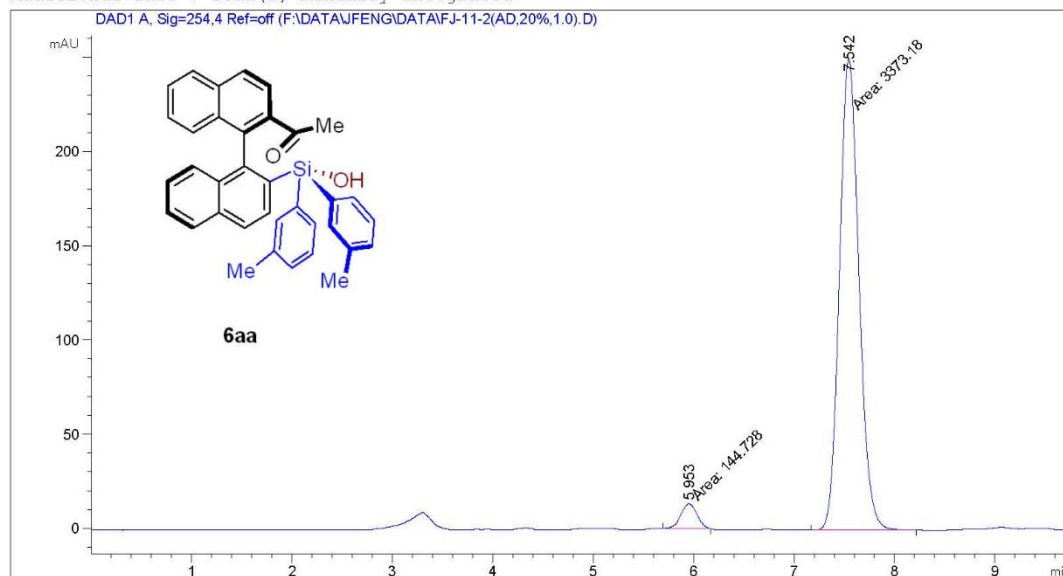

=====  
Area Percent Report  
=====

Sorted By : Signal  
Multiplier : 1.0000  
Dilution : 1.0000  
Use Multiplier & Dilution Factor with ISTDs

Signal 1: DAD1 A, Sig=254,4 Ref=off

| Peak # | RetTime [min] | Type | Width [min] | Area [mAU*s] | Height [mAU] | Area %  |
|--------|---------------|------|-------------|--------------|--------------|---------|
| 1      | 5.953         | MM   | 0.1834      | 144.72801    | 13.15570     | 4.1140  |
| 2      | 7.542         | MM   | 0.2246      | 3373.18140   | 250.26053    | 95.8860 |

Totals : 3517.90941 263.41623

**Supplementary Figure 198. HPLC data of 6aa**

Data File F:\DATA\JFENG\DATA\BXF-2-134 (AD,20%,1.0).D  
Sample Name: BXF-2-134 (AD,20%,1.0)

=====  
Acq. Operator : Location : 1  
Injection Date : 11/11/2019 19:48:42  
Acq. Method : DEF\_LC.M  
Analysis Method : F:\METHOD\ZK.M  
Last changed : 14/07/2019 15:34:15 by  
Additional Info : Peak(s) manually integrated

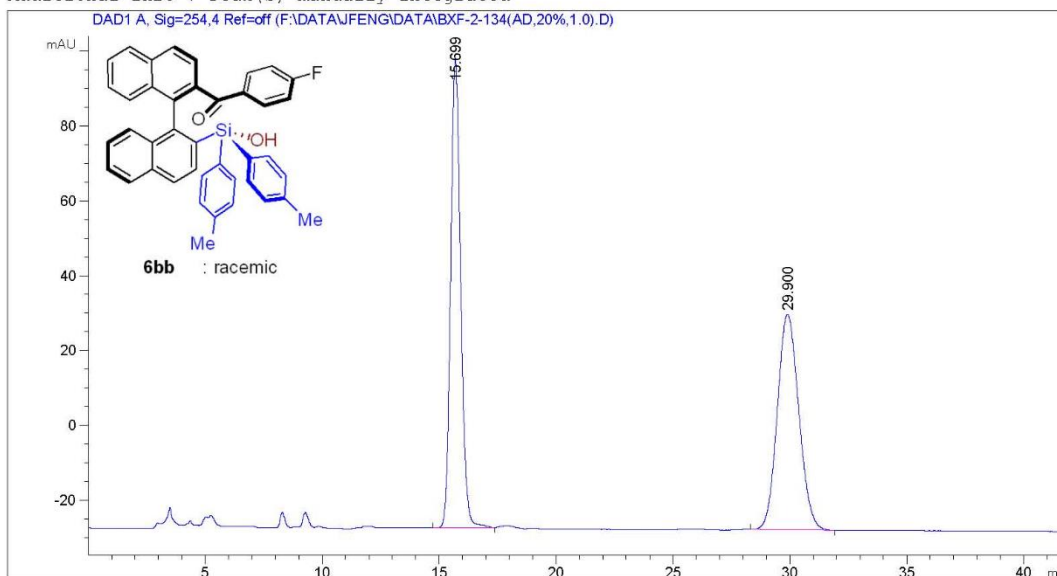

=====  
Area Percent Report  
=====

Sorted By : Signal  
Multiplier : 1.0000  
Dilution : 1.0000  
Use Multiplier & Dilution Factor with ISTDs

Signal 1: DAD1 A, Sig=254,4 Ref=off

| Peak # | RetTime [min] | Type | Width [min] | Area [mAU*s] | Height [mAU] | Area %  |
|--------|---------------|------|-------------|--------------|--------------|---------|
| 1      | 15.699        | BB   | 0.4588      | 3717.13770   | 125.04779    | 50.3423 |
| 2      | 29.900        | BB   | 0.9877      | 3666.59521   | 57.52039     | 49.6577 |

Totals : 7383.73291 182.56818

=====  
\*\*\* End of Report \*\*\*

**Supplementary Figure 199. HPLC data of 6bb**

Data File F:\DATA\JFENG\DATA\BXF-2-133 (AD,20%,1.0).D  
Sample Name: BXF-2-133 (AD,20%,1.0)

=====  
Acq. Operator :  
Sample Operator :  
Acq. Instrument : LC1260 Location : 1  
Injection Date : 11/11/2019 20:34:26 Inj Volume : No inj  
Acq. Method : C:\Chem32\1\Methods\DEF\_LC.M  
Last changed : 11/11/2019 19:40:53 by  
(modified after loading)  
Analysis Method : F:\METHOD\ZK.M  
Last changed : 14/07/2019 15:34:15 by  
Additional Info : Peak(s) manually integrated

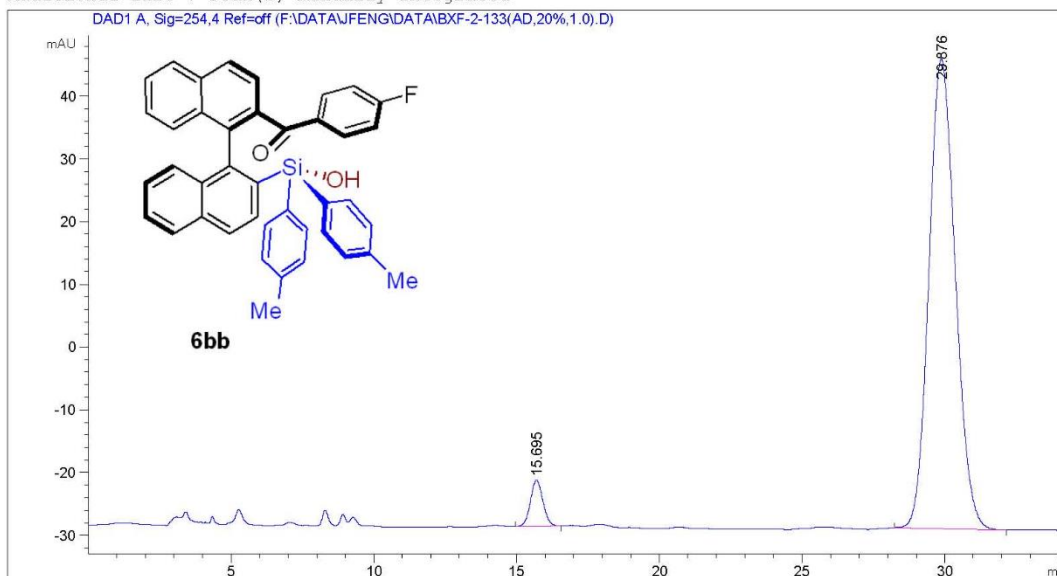

=====  
Area Percent Report  
=====

Sorted By : Signal  
Multiplier : 1.0000  
Dilution : 1.0000  
Use Multiplier & Dilution Factor with ISTDs

Signal 1: DAD1 A, Sig=254,4 Ref=off

| Peak # | RetTime [min] | Type | Width [min] | Area [mAU*s] | Height [mAU] | Area %  |
|--------|---------------|------|-------------|--------------|--------------|---------|
| 1      | 15.695        | BB   | 0.4574      | 219.95226    | 7.34449      | 4.3885  |
| 2      | 29.876        | BB   | 0.9784      | 4792.11133   | 74.90202     | 95.6115 |

Totals : 5012.06358 82.24650

LC1260 30/11/2019 10:39:21

Page 1 of 2

**Supplementary Figure 200. HPLC data of 6bb**



Data File F:\DATA\JFENG\DATA\FJ-11-11-rac(AD,20%,1.0).D  
Sample Name: FJ-11-11-rac(AD,20%,1.0)

=====  
Acq. Operator :  
Sample Operator :  
Acq. Instrument : LC1260 Location : 1  
Injection Date : 02/10/2019 09:14:50 Inj Volume : Manually  
Acq. Method : F:\METHOD\JFeng.M  
Last changed : 02/10/2019 09:02:21 by  
(modified after loading)  
Analysis Method : F:\METHOD\ZK.M  
Last changed : 14/07/2019 15:34:15 by  
Additional Info : Peak(s) manually integrated

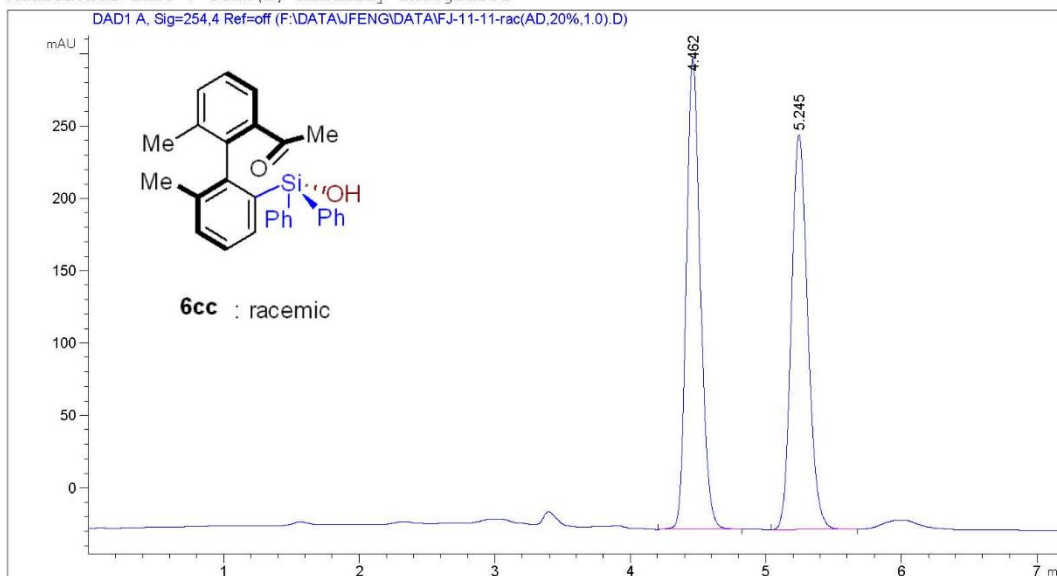

=====  
Area Percent Report  
=====

Sorted By : Signal  
Multiplier : 1.0000  
Dilution : 1.0000  
Use Multiplier & Dilution Factor with ISTDs

Signal 1: DAD1 A, Sig=254,4 Ref=off

| Peak # | RetTime [min] | Type | Width [min] | Area [mAU*s] | Height [mAU] | Area %  |
|--------|---------------|------|-------------|--------------|--------------|---------|
| 1      | 4.462         | BB   | 0.1117      | 2335.01074   | 325.37936    | 50.2081 |
| 2      | 5.245         | BB   | 0.1310      | 2315.65405   | 273.00372    | 49.7919 |

Totals : 4650.66479 598.38309

**Supplementary Figure 201. HPLC data of 6cc**



Data File F:\DATA\JFENG\DATA\FJ-11-10(AD,20%,1.0).D  
Sample Name: FJ-11-10(AD,20%,1.0)

=====  
Acq. Operator : Location : 1  
Injection Date : 02/10/2019 09:26:55  
Acq. Method : JFeng.M  
Analysis Method : F:\METHOD\ZK.M  
Last changed : 14/07/2019 15:34:15 by  
Additional Info : Peak(s) manually integrated

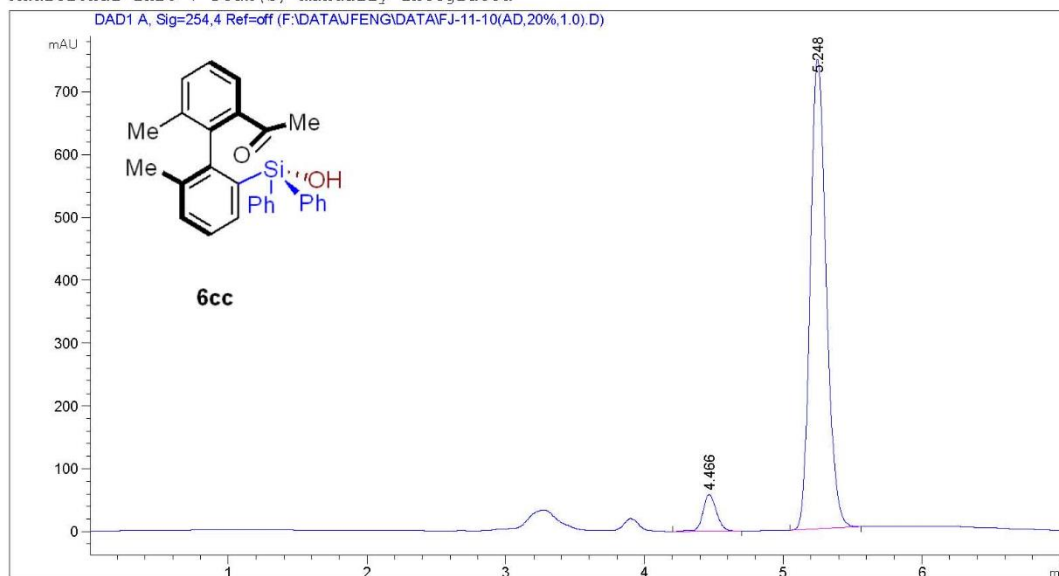

=====  
Area Percent Report  
=====

Sorted By : Signal  
Multiplier : 1.0000  
Dilution : 1.0000  
Use Multiplier & Dilution Factor with ISTDs

Signal 1: DAD1 A, Sig=254,4 Ref=off

| Peak # | RetTime [min] | Type | Width [min] | Area [mAU*s] | Height [mAU] | Area %  |
|--------|---------------|------|-------------|--------------|--------------|---------|
| 1      | 4.466         | BB   | 0.1040      | 391.48196    | 58.51941     | 6.1529  |
| 2      | 5.248         | BB   | 0.1231      | 5971.06201   | 748.19598    | 93.8471 |

Totals : 6362.54398 806.71540

=====  
\*\*\* End of Report \*\*\*

**Supplementary Figure 202. HPLC data of 6cc**

Data File F:\DATA\JFENG\DATA\BXF-2-139(AD,20%,1.0).D  
Sample Name: BXF-2-139(AD,20%,1.0)

=====  
Acq. Operator : Location : 1  
Injection Date : 13/11/2019 20:24:19  
Acq. Method : DEF\_LC.M  
Analysis Method : F:\METHOD\ZK.M  
Last changed : 14/07/2019 15:34:15 by  
Additional Info : Peak(s) manually integrated

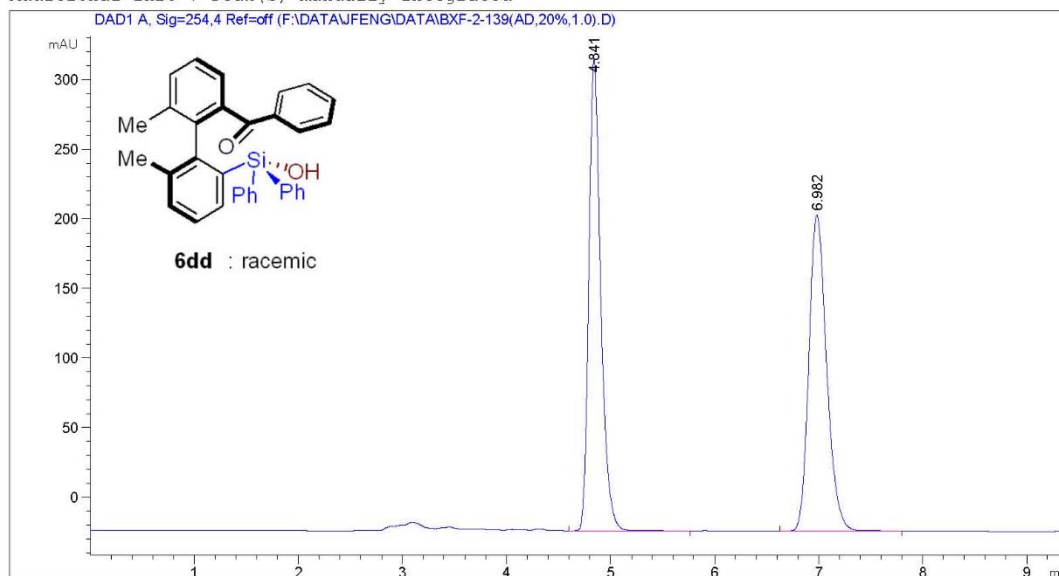

=====  
Area Percent Report  
=====

Sorted By : Signal  
Multiplier : 1.0000  
Dilution : 1.0000  
Use Multiplier & Dilution Factor with ISTDs

Signal 1: DAD1 A, Sig=254,4 Ref=off

| Peak # | RetTime [min] | Type | Width [min] | Area [mAU*s] | Height [mAU] | Area %  |
|--------|---------------|------|-------------|--------------|--------------|---------|
| 1      | 4.841         | BB   | 0.1188      | 2694.25537   | 338.59076    | 50.0765 |
| 2      | 6.982         | BB   | 0.1819      | 2686.01855   | 227.27237    | 49.9235 |

Totals : 5380.27393 565.86313

=====  
\*\*\* End of Report \*\*\*

**Supplementary Figure 203. HPLC data of 6dd**

Data File F:\DATA\JFENG\DATA\BXF-2-138-2(AD,20%,1.0).D  
Sample Name: BXF-2-138-2(AD,20%,1.0)

=====  
Acq. Operator :  
Sample Operator :  
Acq. Instrument : LC1260 Location : 1  
Injection Date : 14/11/2019 13:30:51 Inj Volume : No inj  
Acq. Method : C:\Chem32\1\Methods\DEF\_LC.M  
Last changed : 14/11/2019 13:24:42 by  
(modified after loading)  
Analysis Method : F:\METHOD\ZK.M  
Last changed : 14/07/2019 15:34:15 by  
Additional Info : Peak(s) manually integrated

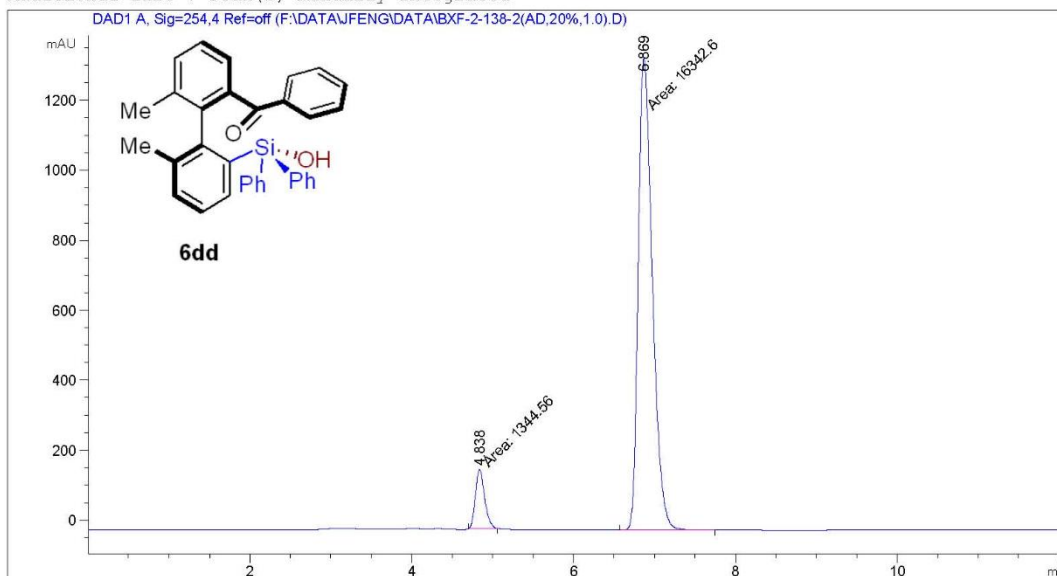

=====  
Area Percent Report  
=====

Sorted By : Signal  
Multiplier : 1.0000  
Dilution : 1.0000  
Use Multiplier & Dilution Factor with ISTDs

Signal 1: DAD1 A, Sig=254,4 Ref=off

| Peak # | RetTime [min] | Type | Width [min] | Area [mAU*s] | Height [mAU] | Area %  |
|--------|---------------|------|-------------|--------------|--------------|---------|
| 1      | 4.838         | MM   | 0.1328      | 1344.55688   | 168.68443    | 7.6019  |
| 2      | 6.869         | MM   | 0.2021      | 1.63426e4    | 1347.47070   | 92.3981 |

Totals : 1.76871e4 1516.15514

**Supplementary Figure 204. HPLC data of 6dd**

Data File F:\DATA\JFENG\DATA\BXF-2-150(AD,20%,1.0).D  
Sample Name: BXF-2-150(AD,20%,1.0)

=====  
Acq. Operator : Location : 1  
Injection Date : 19/11/2019 15:40:14  
Acq. Method : DEF\_LC.M  
Analysis Method : F:\METHOD\ZK.M  
Last changed : 14/07/2019 15:34:15 by  
Additional Info : Peak(s) manually integrated

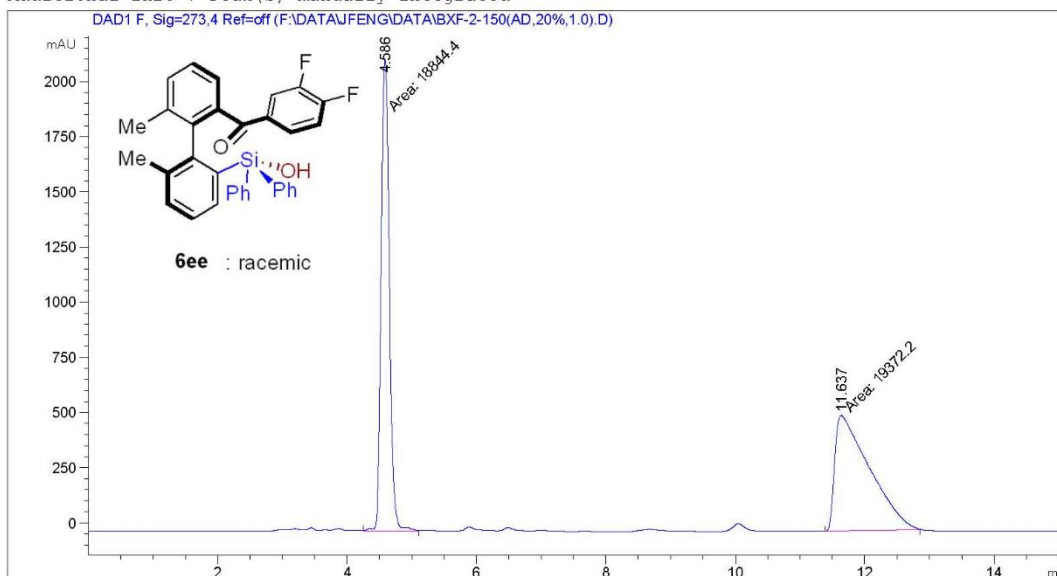

=====  
Area Percent Report  
=====

Sorted By : Signal  
Multiplier : 1.0000  
Dilution : 1.0000  
Use Multiplier & Dilution Factor with ISTDs

Signal 1: DAD1 F, Sig=273,4 Ref=off

| Peak # | RetTime [min] | Type | Width [min] | Area [mAU*s] | Height [mAU] | Area %  |
|--------|---------------|------|-------------|--------------|--------------|---------|
| 1      | 4.586         | MM   | 0.1469      | 1.88444e4    | 2137.47729   | 49.3094 |
| 2      | 11.637        | MM   | 0.6176      | 1.93722e4    | 522.74225    | 50.6906 |

Totals : 3.82166e4 2660.21954

=====  
\*\*\* End of Report \*\*\*

**Supplementary Figure 205. HPLC data of 6ee**

Data File F:\DATA\JFENG\DATA\BXF-2-149(AD,20%,1.0).D  
Sample Name: BXF-2-149(AD,20%,1.0)

=====  
Acq. Operator :  
Sample Operator :  
Acq. Instrument : LC1260 Location : 1  
Injection Date : 19/11/2019 16:01:08 Inj Volume : No inj  
Acq. Method : C:\Chem32\1\Methods\DEF\_LC.M  
Last changed : 19/11/2019 15:33:49 by  
(modified after loading)  
Analysis Method : F:\METHOD\ZK.M  
Last changed : 14/07/2019 15:34:15 by  
Additional Info : Peak(s) manually integrated

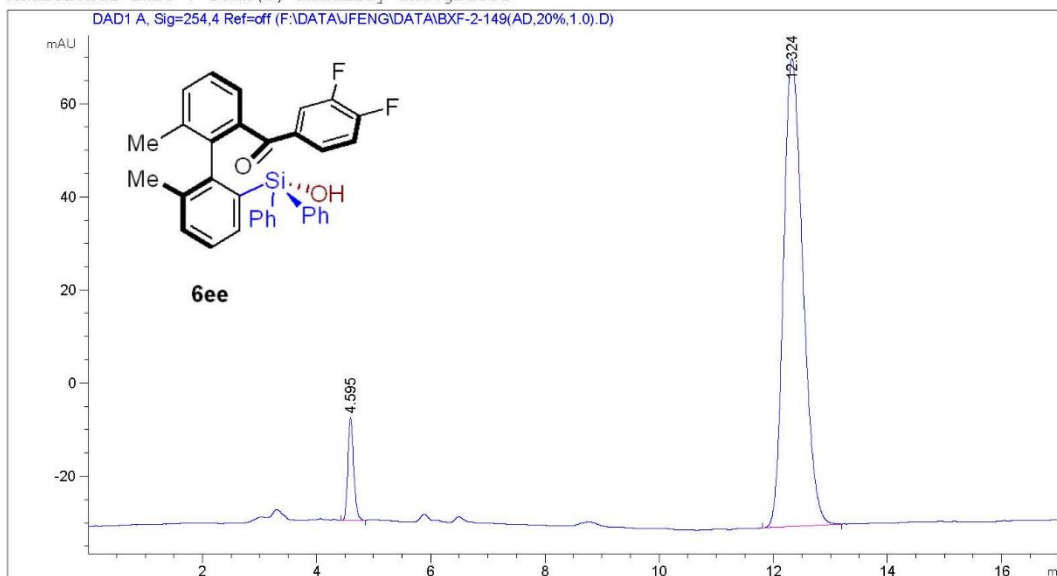

=====  
Area Percent Report  
=====

Sorted By : Signal  
Multiplier : 1.0000  
Dilution : 1.0000  
Use Multiplier & Dilution Factor with ISTDs

Signal 1: DAD1 A, Sig=254,4 Ref=off

| Peak # | RetTime [min] | Type | Width [min] | Area [mAU*s] | Height [mAU] | Area %  |
|--------|---------------|------|-------------|--------------|--------------|---------|
| 1      | 4.595         | BB   | 0.1078      | 154.87248    | 22.10028     | 6.1456  |
| 2      | 12.324        | BB   | 0.3647      | 2365.19214   | 100.43896    | 93.8544 |

Totals : 2520.06462 122.53924

**Supplementary Figure 206. HPLC data of 6ee**

Data File F:\DATA\JFENG\DATA\SL-1-16(AD,20%,1.0).D  
Sample Name: SL-1-16(AD,20%,1.0)

=====  
Acq. Operator : Location : 1  
Injection Date : 26/10/2019 16:22:16  
Acq. Method : DEF\_LC.M  
Analysis Method : F:\METHOD\ZK.M  
Last changed : 14/07/2019 15:34:15 by  
Additional Info : Peak(s) manually integrated

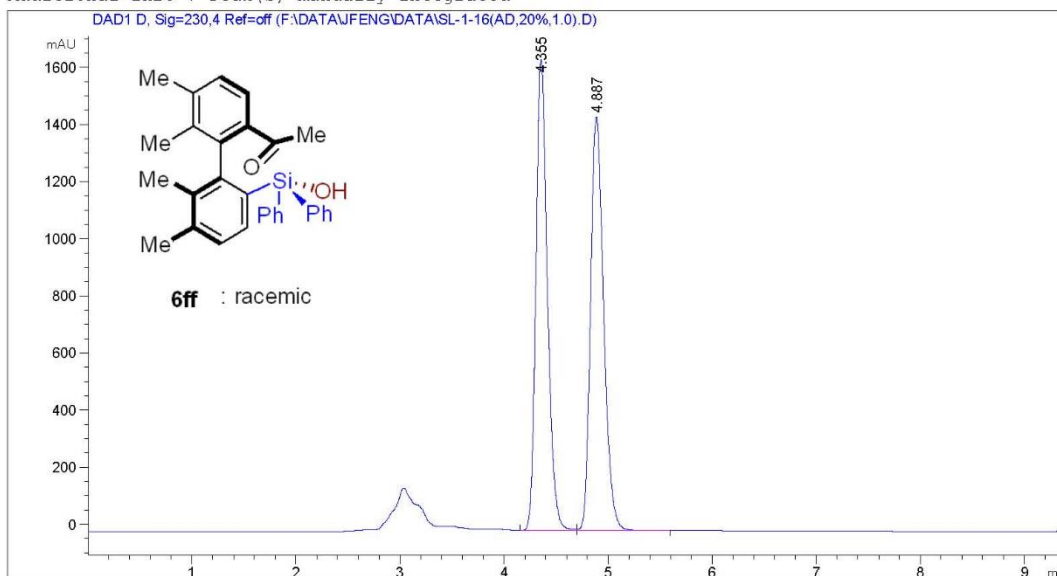

=====  
Area Percent Report  
=====

Sorted By : Signal  
Multiplier : 1.0000  
Dilution : 1.0000  
Use Multiplier & Dilution Factor with ISTDs

Signal 1: DAD1 D, Sig=230,4 Ref=off

| Peak # | RetTime [min] | Type | Width [min] | Area [mAU*s] | Height [mAU] | Area %  |
|--------|---------------|------|-------------|--------------|--------------|---------|
| 1      | 4.355         | BV   | 0.1168      | 1.25693e4    | 1650.55920   | 49.7878 |
| 2      | 4.887         | VB   | 0.1340      | 1.26764e4    | 1449.27954   | 50.2122 |

Totals : 2.52456e4 3099.83875

=====  
\*\*\* End of Report \*\*\*

**Supplementary Figure 207. HPLC data of 6ff**

Data File F:\DATA\JFENG\DATA\FJ-11-480 (AD,20%,1.0).D  
Sample Name: FJ-11-480 (AD,20%,1.0)

=====  
Acq. Operator :  
Sample Operator :  
Acq. Instrument : LC1260 Location : 1  
Injection Date : 26/10/2019 16:47:40 Inj Volume : No inj  
Acq. Method : C:\Chem32\1\Methods\DEF\_LC.M  
Last changed : 26/10/2019 16:16:32 by  
(modified after loading)  
Analysis Method : F:\METHOD\ZK.M  
Last changed : 14/07/2019 15:34:15 by  
Additional Info : Peak(s) manually integrated

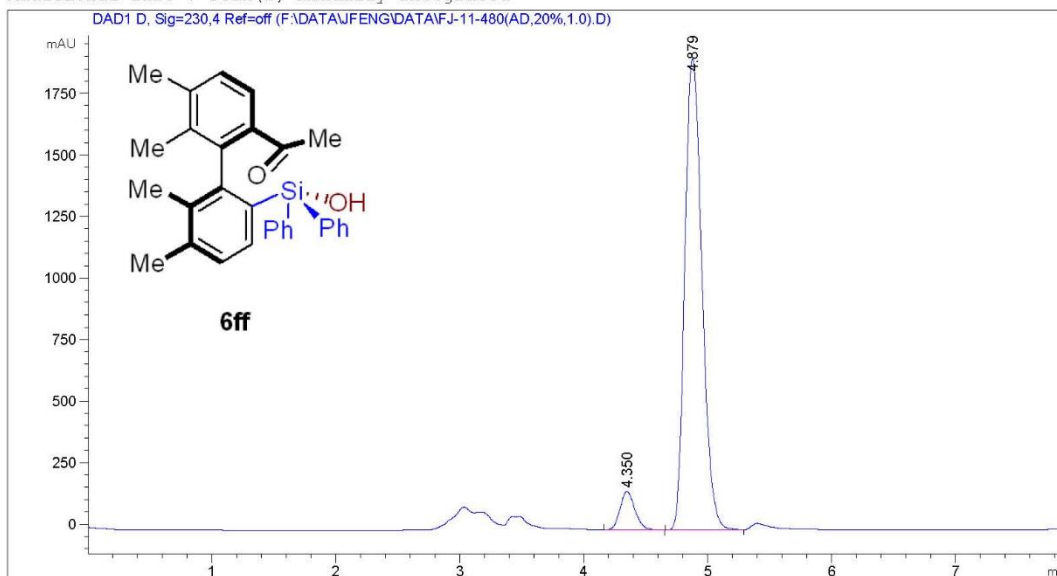

=====  
Area Percent Report  
=====

Sorted By : Signal  
Multiplier : 1.0000  
Dilution : 1.0000  
Use Multiplier & Dilution Factor with ISTDs

Signal 1: DAD1 D, Sig=230,4 Ref=off

| Peak # | RetTime [min] | Type | Width [min] | Area [mAU*s] | Height [mAU] | Area %  |
|--------|---------------|------|-------------|--------------|--------------|---------|
| 1      | 4.350         | BB   | 0.1280      | 1282.92566   | 155.90511    | 6.5373  |
| 2      | 4.879         | BB   | 0.1518      | 1.83418e4    | 1913.80811   | 93.4627 |

Totals : 1.96247e4 2069.71321

**Supplementary Figure 208. HPLC data of 6ff**

Data File F:\DATA\BXF\DATA\bx-f-3-87 (AD, 90%, 1.0).D  
 Sample Name: bx-f-3-87 (AD, 90%, 1.0)

=====  
 Acq. Operator : Location : 1  
 Injection Date : 05/06/2020 20:06:16  
 Acq. Method : DEF\_LC.M  
 Analysis Method : C:\Chem32\1\Methods\DEF\_LC.M  
 Last changed : 13/02/2014 23:27:44 by SYSTEM  
 Additional Info : Peak(s) manually integrated

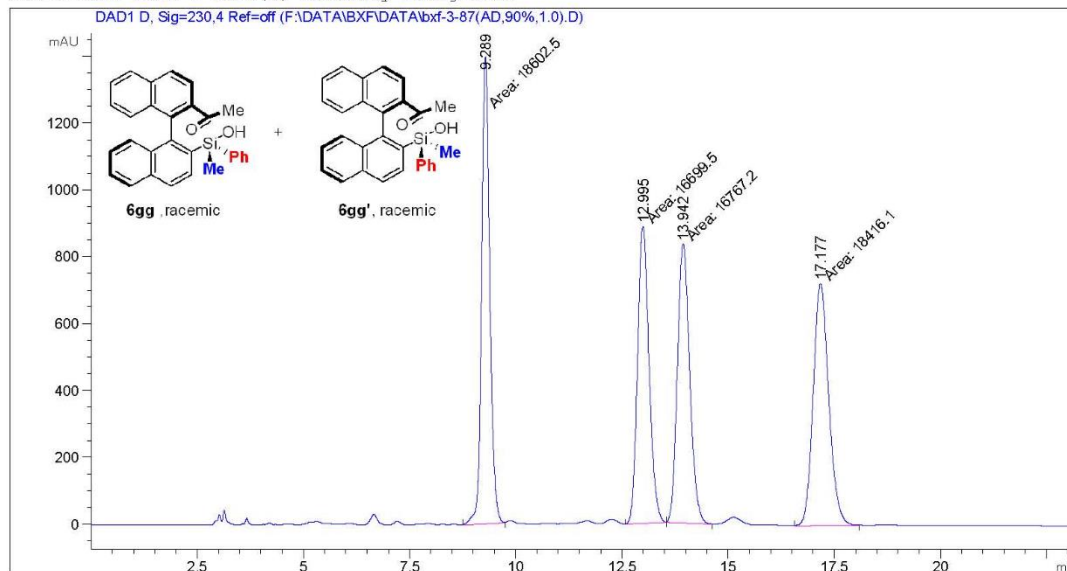

=====  
 Area Percent Report  
 =====

Sorted By : Signal  
 Multiplier : 1.0000  
 Dilution : 1.0000  
 Use Multiplier & Dilution Factor with ISTDs

Signal 1: DAD1 D, Sig=230,4 Ref=off

| Peak # | RetTime [min] | Type | Width [min] | Area [mAU*s] | Height [mAU] | Area %  |
|--------|---------------|------|-------------|--------------|--------------|---------|
| 1      | 9.289         | MM   | 0.2221      | 1.86025e4    | 1396.24304   | 26.3920 |
| 2      | 12.995        | MM   | 0.3132      | 1.66995e4    | 888.73657    | 23.6922 |
| 3      | 13.942        | MM   | 0.3352      | 1.67672e4    | 833.79187    | 23.7882 |
| 4      | 17.177        | MM   | 0.4242      | 1.84161e4    | 723.56079    | 26.1276 |

Totals : 7.04853e4 3842.33228

=====  
 \*\*\* End of Report \*\*\*

**Supplementary Figure 209. HPLC data of a mixture of 6gg and 6gg'**



Data File F:\DATA\EXF\DATA\bxf-3-97(AD,90%,1.0).D  
 Sample Name: bxf-3-97(AD,90%,1.0)

```

=====
Acq. Operator   :
Sample Operator :
Acq. Instrument : LC1260                      Location : 1
Injection Date  : 05/06/2020 20:30:54
                                           Inj Volume : No inj

Acq. Method     : C:\Chem32\1\Methods\DEF_LC.M
Last changed    : 05/06/2020 19:59:36 by 系统
                 (modified after loading)
Analysis Method : C:\Chem32\1\Methods\DEF_LC.M
Last changed    : 13/02/2014 23:27:44 by SYSTEM
Additional Info  : Peak(s) manually integrated
  
```

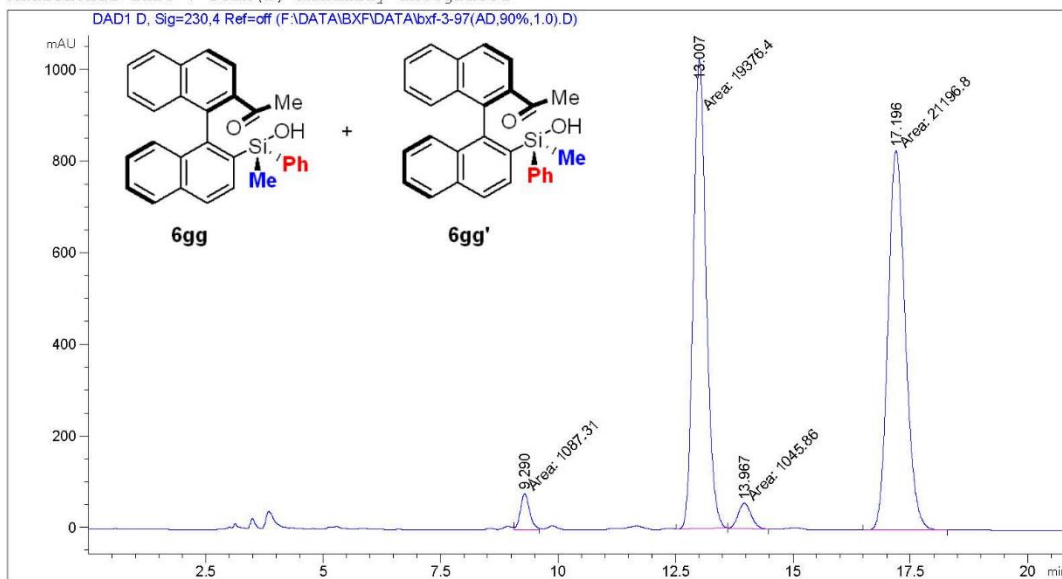

Area Percent Report

```

Sorted By      : Signal
Multiplier     : 1.0000
Dilution       : 1.0000
Use Multiplier & Dilution Factor with ISTDs
  
```

Signal 1: DAD1 D, Sig=230,4 Ref=off

| Peak # | RetTime [min] | Type | Width [min] | Area [mAU*s] | Height [mAU] | Area %  |
|--------|---------------|------|-------------|--------------|--------------|---------|
| 1      | 9.290         | MM   | 0.2274      | 1087.30542   | 79.70558     | 2.5460  |
| 2      | 13.007        | MM   | 0.3147      | 1.93764e4    | 1026.02612   | 45.3712 |
| 3      | 13.967        | MM   | 0.3160      | 1045.86145   | 55.16383     | 2.4490  |
| 4      | 17.196        | MM   | 0.4265      | 2.11968e4    | 828.32391    | 49.6338 |

Totals : 4.27063e4 1989.21945

**Supplementary Figure 210. HPLC data of a mixture of 6gg and 6gg'**

Data File F:\DATA\JFENG\DATA\FJ-12-129-rac(AD,20%,1.0).D  
Sample Name: FJ-12-129-rac(AD,20%,1.0)

=====  
Acq. Operator : Location : 1  
Injection Date : 30/05/2020 19:23:31  
Acq. Method : DEF\_LC.M  
Analysis Method : C:\Chem32\1\Methods\DEF\_LC.M  
Last changed : 13/02/2014 23:27:44 by SYSTEM  
Additional Info : Peak(s) manually integrated

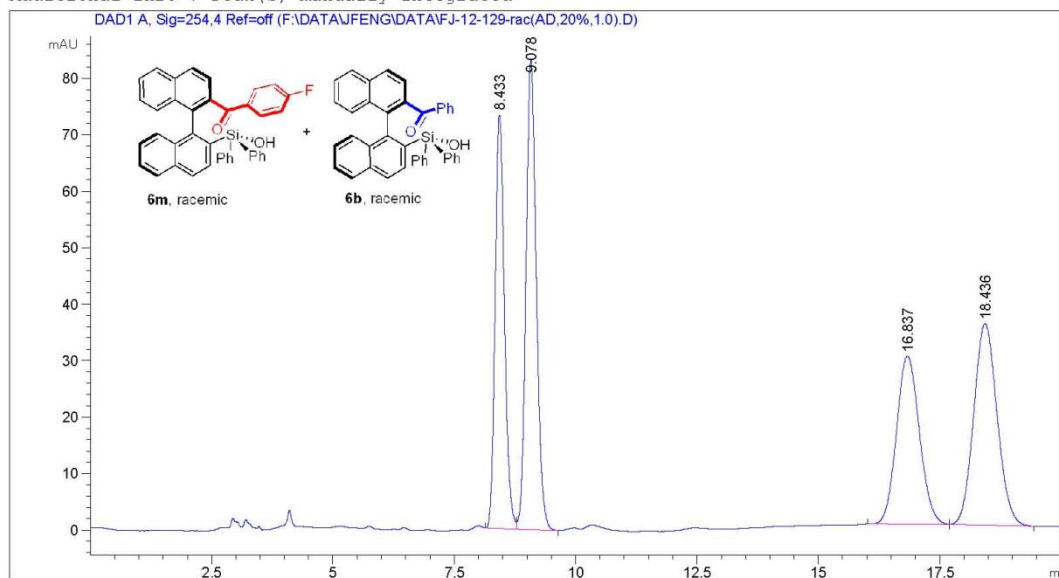

=====  
Area Percent Report  
=====

Sorted By : Signal  
Multiplier : 1.0000  
Dilution : 1.0000  
Use Multiplier & Dilution Factor with ISTDs

Signal 1: DAD1 A, Sig=254,4 Ref=off

| Peak # | RetTime [min] | Type | Width [min] | Area [mAU*s] | Height [mAU] | Area %  |
|--------|---------------|------|-------------|--------------|--------------|---------|
| 1      | 8.433         | BV   | 0.2053      | 975.61163    | 73.31185     | 22.3421 |
| 2      | 9.078         | VB   | 0.2249      | 1219.14490   | 83.20212     | 27.9191 |
| 3      | 16.837        | BB   | 0.5125      | 976.81873    | 29.79408     | 22.3697 |
| 4      | 18.436        | BB   | 0.5209      | 1195.12402   | 35.66485     | 27.3690 |

Totals : 4366.69928 221.97290

=====  
\*\*\* End of Report \*\*\*

**Supplementary Figure 211. HPLC data of a mixture of 6m and 6b**

```

=====
Acq. Operator   :
Sample Operator :
Acq. Instrument : LC1260                      Location : 1
Injection Date  : 30/05/2020 19:45:47        Inj Volume : No inj

Acq. Method     : C:\Chem32\1\Methods\DEF_LC.M
Last changed    : 30/05/2020 19:17:08 by
                  (modified after loading)
Analysis Method  : C:\Chem32\1\Methods\DEF_LC.M
Last changed    : 13/02/2014 23:27:44 by SYSTEM
Additional Info  : Peak(s) manually integrated
  
```

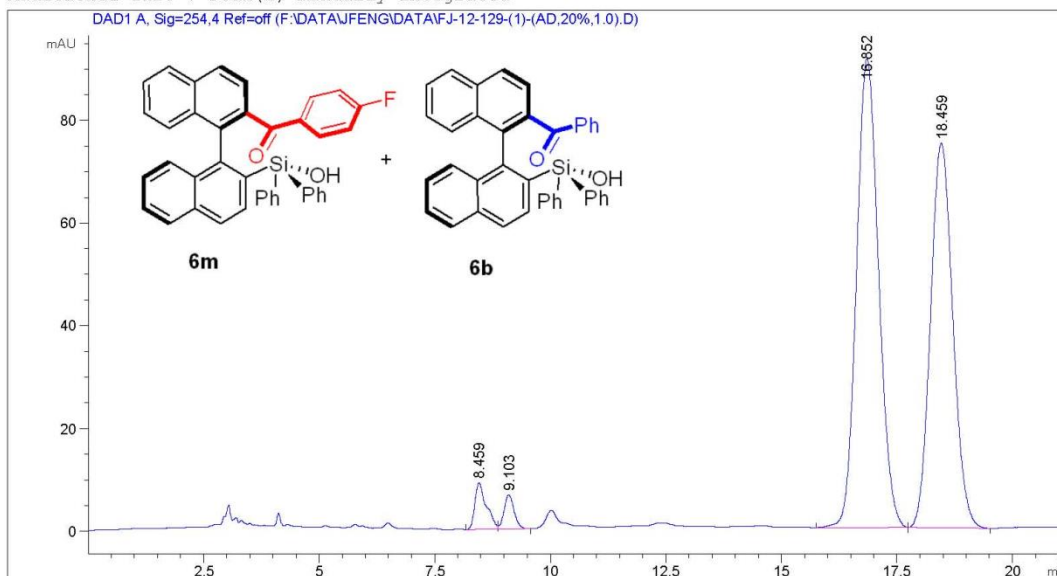

Area Percent Report

```

Sorted By      : Signal
Multiplier     : 1.0000
Dilution       : 1.0000
Use Multiplier & Dilution Factor with ISTDs
  
```

Signal 1: DAD1 A, Sig=254,4 Ref=off

| Peak # | RetTime [min] | Type | Width [min] | Area [mAU*s] | Height [mAU] | Area %  |
|--------|---------------|------|-------------|--------------|--------------|---------|
| 1      | 8.459         | BV   | 0.2472      | 157.42493    | 9.12679      | 2.7260  |
| 2      | 9.103         | VB   | 0.2299      | 100.14957    | 6.71967      | 1.7342  |
| 3      | 16.852        | BB   | 0.5137      | 3016.47290   | 91.25153     | 52.2334 |
| 4      | 18.459        | BB   | 0.5197      | 2500.93750   | 74.86879     | 43.3064 |

Totals : 5774.98490 181.96678

**Supplementary Figure 212. HPLC data of a mixture of 6m and 6b**

Data File F:\DATA\JFENG\DATA\FJ-11-169-race-(1) (AD,10%,1.0).D  
 Sample Name: FJ-11-169-race-(1) (AD,10%,1.0)

```

=====
Acq. Operator   :
Sample Operator :
Acq. Instrument : LC1260                      Location : 1
Injection Date  : 01/03/2020 15:18:05        Inj Volume : Manually

Acq. Method    : F:\METHOD\JFeng.M
Last changed   : 01/03/2020 14:45:42 by
                (modified after loading)
Analysis Method : F:\METHOD\JFeng.M
Last changed   : 19/09/2014 20:49:49 by
Additional Info : Peak(s) manually integrated
  
```

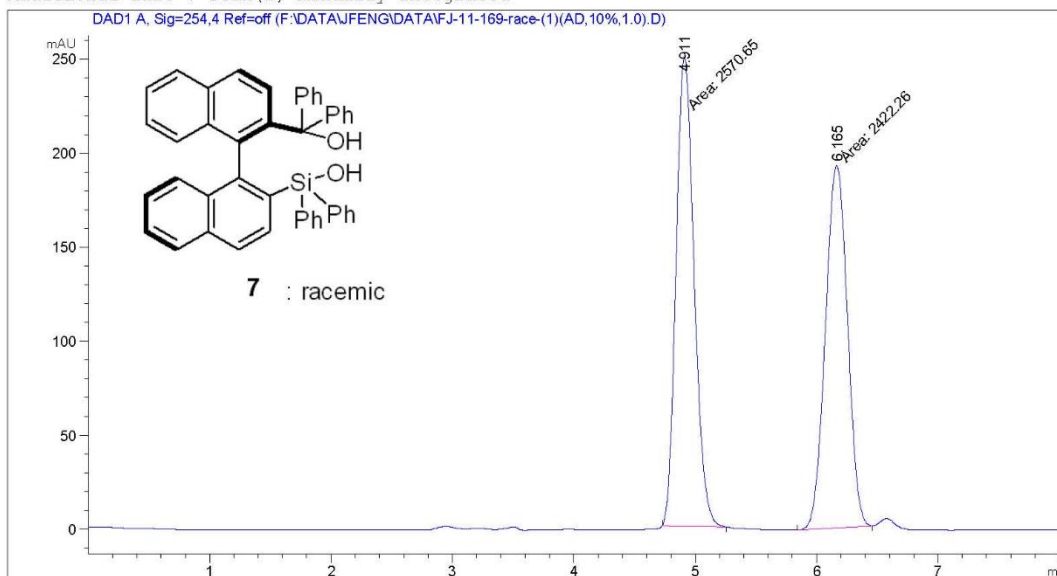

Area Percent Report

```

Sorted By      : Signal
Multiplier     : 1.0000
Dilution       : 1.0000
Use Multiplier & Dilution Factor with ISTDs
  
```

Signal 1: DAD1 A, Sig=254,4 Ref=off

| Peak # | RetTime [min] | Type | Width [min] | Area [mAU*s] | Height [mAU] | Area %  |
|--------|---------------|------|-------------|--------------|--------------|---------|
| 1      | 4.911         | MM   | 0.1720      | 2570.65186   | 249.05777    | 51.4860 |
| 2      | 6.165         | MM   | 0.2095      | 2422.26465   | 192.74477    | 48.5140 |

Totals : 4992.91650 441.80254

**Supplementary Figure 213. HPLC data of 7**

Data File F:\DATA\JFENG\DATA\FJ-11-169-chiral-0226(AD,10%,1.0).D  
 Sample Name: FJ-11-169-chiral-0226(AD,10%,1.0)

```

=====
Acq. Operator   :
Sample Operator :
Acq. Instrument : LC1260                      Location : 1
Injection Date  : 26/02/2020 15:16:53        Inj Volume : Manually

Acq. Method     : F:\METHOD\JFeng.M
Last changed    : 26/02/2020 14:48:03 by
                  (modified after loading)
Analysis Method  : F:\METHOD\JFeng.M
Last changed    : 19/09/2014 20:49:49 by
Additional Info  : Peak(s) manually integrated
  
```

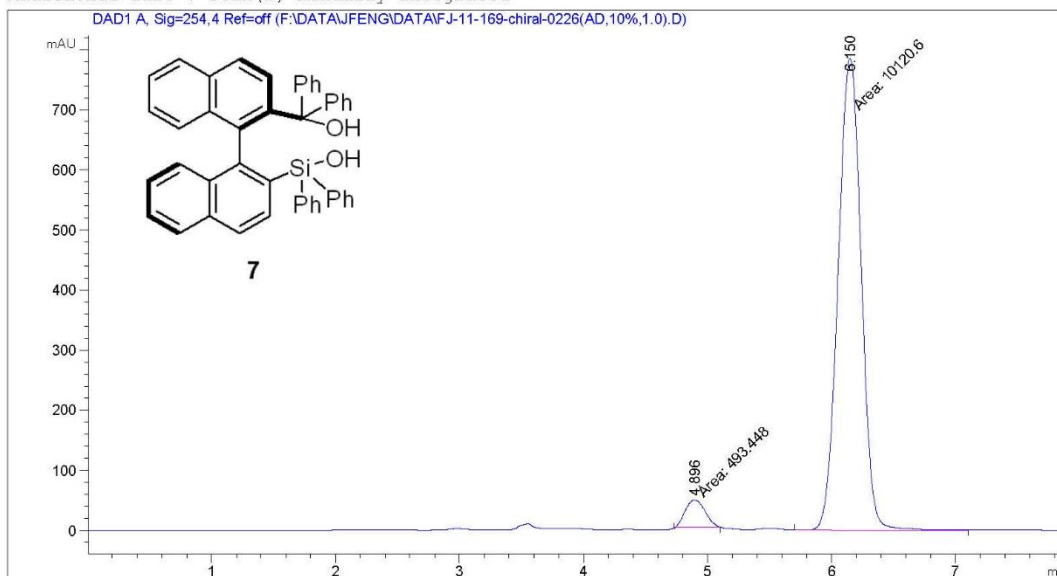

Area Percent Report

```

Sorted By      : Signal
Multiplier     : 1.0000
Dilution       : 1.0000
Use Multiplier & Dilution Factor with ISTDs
  
```

Signal 1: DAD1 A, Sig=254,4 Ref=off

| Peak # | RetTime [min] | Type | Width [min] | Area [mAU*s] | Height [mAU] | Area %  |
|--------|---------------|------|-------------|--------------|--------------|---------|
| 1      | 4.896         | MM   | 0.1824      | 493.44849    | 45.10007     | 4.6490  |
| 2      | 6.150         | MM   | 0.2149      | 1.01206e4    | 784.92267    | 95.3510 |

Totals : 1.06141e4 830.02274

**Supplementary Figure 214. HPLC data of 7**

Data File F:\DATA\JFENG\DATA\FJ-11-123-rac-(2) (AD,10%,1.0).D  
Sample Name: FJ-11-123-rac-(2) (AD,10%,1.0)

=====  
Acq. Operator : Location : 1  
Injection Date : 01/03/2020 17:23:51  
Acq. Method : JFeng.M  
Analysis Method : F:\METHOD\JFeng.M  
Last changed : 19/09/2014 20:49:49 by  
Additional Info : Peak(s) manually integrated

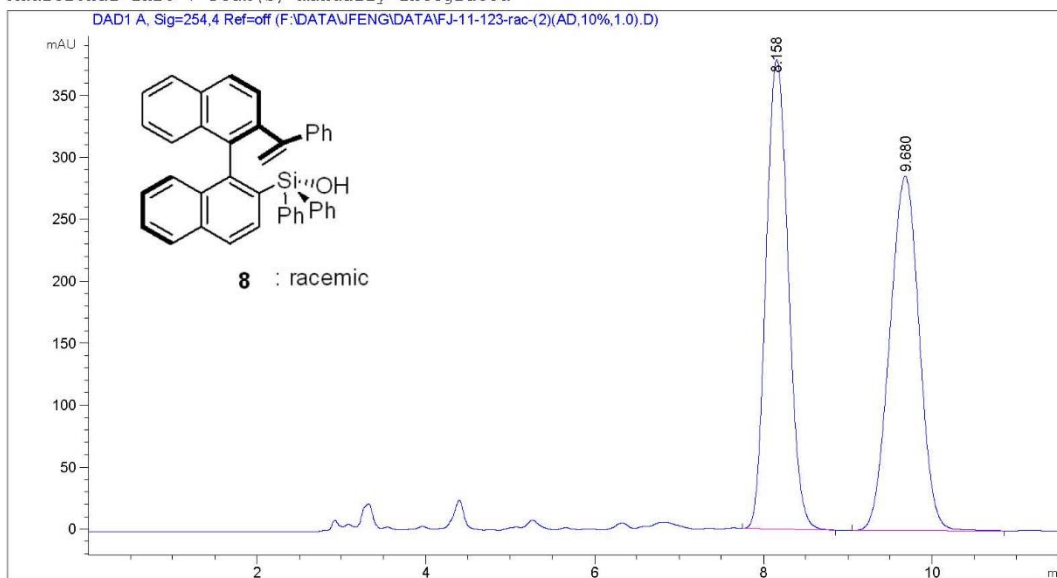

=====  
Area Percent Report  
=====

Sorted By : Signal  
Multiplier : 1.0000  
Dilution : 1.0000  
Use Multiplier & Dilution Factor with ISTDs

Signal 1: DAD1 A, Sig=254,4 Ref=off

| Peak # | RetTime [min] | Type | Width [min] | Area [mAU*s] | Height [mAU] | Area %  |
|--------|---------------|------|-------------|--------------|--------------|---------|
| 1      | 8.158         | BB   | 0.2881      | 6883.85938   | 378.69330    | 49.8741 |
| 2      | 9.680         | BB   | 0.3824      | 6918.61914   | 285.77731    | 50.1259 |

Totals : 1.38025e4 664.47061

=====  
\*\*\* End of Report \*\*\*

**Supplementary Figure 215. HPLC data of 8**

Data File F:\DATA\JFENG\DATA\FJ-11-123-chiral-(8) (AD,10%,1.0).D  
Sample Name: FJ-11-123-chiral-(8) (AD,10%,1.0)

=====  
Acq. Operator :  
Sample Operator :  
Acq. Instrument : LC1260 Location : 1  
Injection Date : 01/03/2020 17:09:06 Inj Volume : Manually  
Acq. Method : F:\METHOD\JFeng.M  
Last changed : 01/03/2020 16:47:42 by  
(modified after loading)  
Analysis Method : F:\METHOD\JFeng.M  
Last changed : 19/09/2014 20:49:49 by  
Additional Info : Peak(s) manually integrated

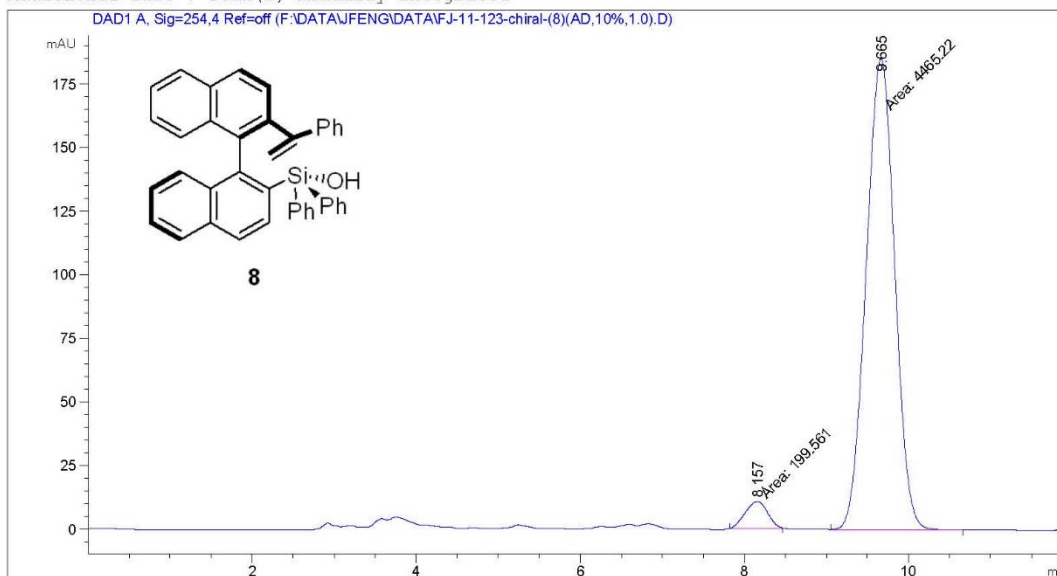

=====  
Area Percent Report  
=====

Sorted By : Signal  
Multiplier : 1.0000  
Dilution : 1.0000  
Use Multiplier & Dilution Factor with ISTDs

Signal 1: DAD1 A, Sig=254,4 Ref=off

| Peak # | RetTime [min] | Type | Width [min] | Area [mAU*s] | Height [mAU] | Area %  |
|--------|---------------|------|-------------|--------------|--------------|---------|
| 1      | 8.157         | MM   | 0.3126      | 199.56143    | 10.63889     | 4.2780  |
| 2      | 9.665         | MM   | 0.4017      | 4465.22070   | 185.24721    | 95.7220 |

Totals : 4664.78214 195.88610

**Supplementary Figure 216. HPLC data of 8**



Data File F:\DATA\JFENG\DATA\FJ-11-170-rac-0225 (AD,6%,1.0).D  
Sample Name: FJ-11-170-rac-0225 (AD,6%,1.0)

=====  
Acq. Operator :  
Sample Operator :  
Acq. Instrument : LC1260 Location : 1  
Injection Date : 25/02/2020 10:48:00 Inj Volume : Manually  
Acq. Method : F:\METHOD\JFeng.M  
Last changed : 25/02/2020 10:45:25 by  
(modified after loading)  
Analysis Method : F:\METHOD\JFeng.M  
Last changed : 19/09/2014 20:49:49 by  
Additional Info : Peak(s) manually integrated

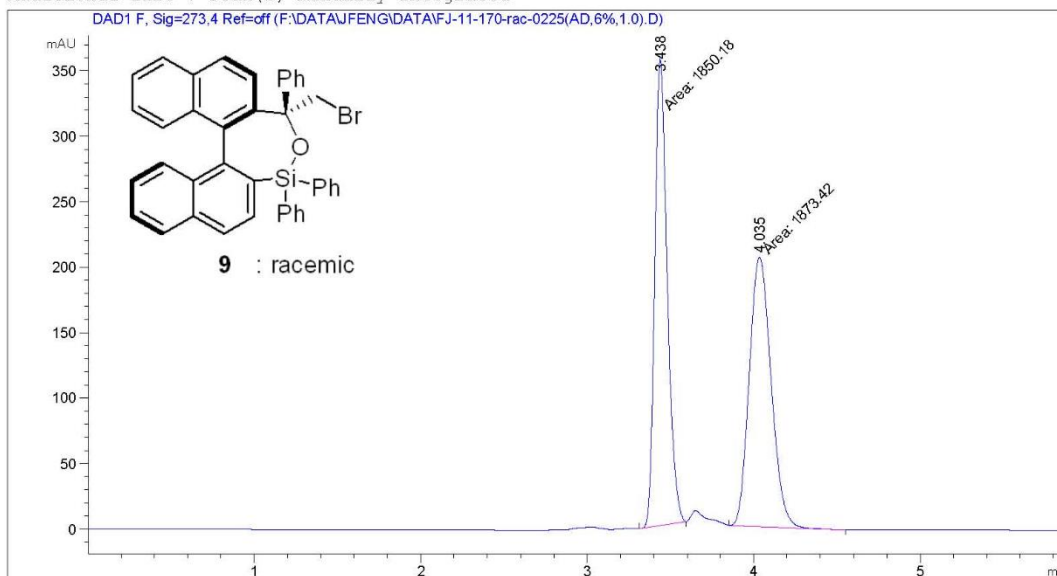

=====  
Area Percent Report  
=====

Sorted By : Signal  
Multiplier : 1.0000  
Dilution : 1.0000  
Use Multiplier & Dilution Factor with ISTDs

Signal 1: DAD1 F, Sig=273,4 Ref=off

| Peak # | RetTime [min] | Type | Width [min] | Area [mAU*s] | Height [mAU] | Area %  |
|--------|---------------|------|-------------|--------------|--------------|---------|
| 1      | 3.438         | MM   | 0.0863      | 1850.17505   | 357.46512    | 49.6878 |
| 2      | 4.035         | MM   | 0.1516      | 1873.42151   | 206.02863    | 50.3122 |

Totals : 3723.59656 563.49374

**Supplementary Figure 217. HPLC data of 9**



Data File F:\DATA\JFENG\DATA\FJ-11-170-chiral-0225 (AD,6%,1.0).D  
Sample Name: FJ-11-170-chiral-0225 (AD,6%,1.0)

=====  
Acq. Operator : Location : 1  
Injection Date : 25/02/2020 10:57:15  
Acq. Method : JFeng.M  
Analysis Method : F:\METHOD\JFeng.M  
Last changed : 19/09/2014 20:49:49 by  
Additional Info : Peak(s) manually integrated

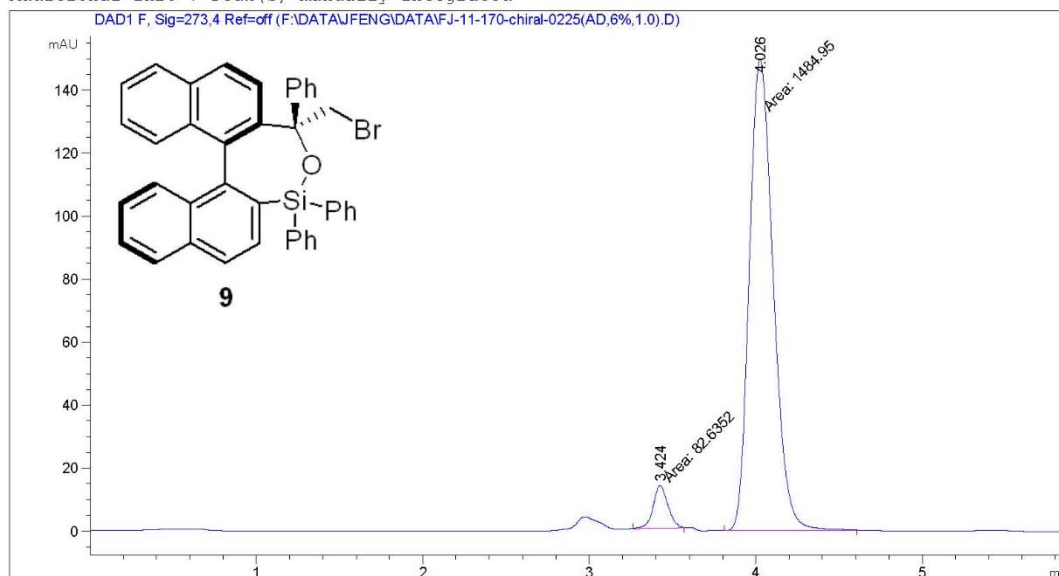

=====  
Area Percent Report  
=====

Sorted By : Signal  
Multiplier : 1.0000  
Dilution : 1.0000  
Use Multiplier & Dilution Factor with ISTDs

Signal 1: DAD1 F, Sig=273,4 Ref=off

| Peak # | RetTime [min] | Type | Width [min] | Area [mAU*s] | Height [mAU] | Area %  |
|--------|---------------|------|-------------|--------------|--------------|---------|
| 1      | 3.424         | MM   | 0.1019      | 82.63519     | 13.52122     | 5.2715  |
| 2      | 4.026         | MM   | 0.1654      | 1484.94800   | 149.61452    | 94.7285 |

Totals : 1567.58319 163.13574

=====  
\*\*\* End of Report \*\*\*

**Supplementary Figure 218. HPLC data of 9**

Data File F:\DATA\JFENG\DATA\FJ-12-195-a-race(OD,5%,1.0).D  
Sample Name: FJ-12-195-a-RACE(OD,5%,1.0)

=====  
Acq. Operator : Location : 1  
Injection Date : 27/06/2020 16:02:11  
Acq. Method : DEF\_LC.M  
Analysis Method : C:\Chem32\1\Methods\DEF\_LC.M  
Last changed : 13/02/2014 23:27:44 by SYSTEM  
Additional Info : Peak(s) manually integrated

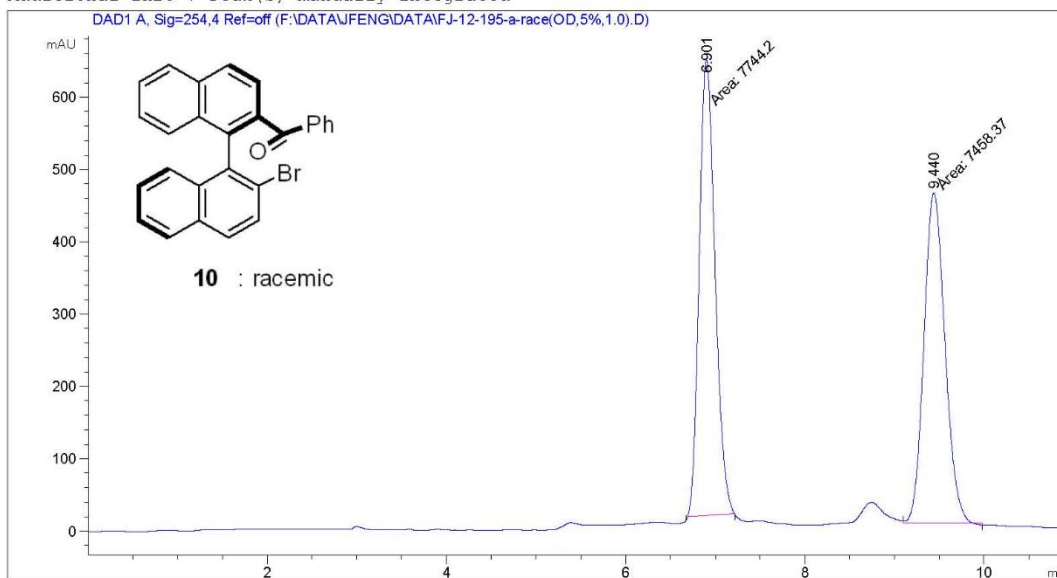

=====  
Area Percent Report  
=====

Sorted By : Signal  
Multiplier : 1.0000  
Dilution : 1.0000  
Use Multiplier & Dilution Factor with ISTDs

Signal 1: DAD1 A, Sig=254,4 Ref=off

| Peak # | RetTime [min] | Type | Width [min] | Area [mAU*s] | Height [mAU] | Area %  |
|--------|---------------|------|-------------|--------------|--------------|---------|
| 1      | 6.901         | MM   | 0.2046      | 7744.19629   | 630.75885    | 50.9401 |
| 2      | 9.440         | MM   | 0.2720      | 7458.36865   | 456.97809    | 49.0599 |

Totals : 1.52026e4 1087.73694

=====  
\*\*\* End of Report \*\*\*

Data File F:\DATA\JFENG\DATA\FJ-12-199- (OD,5%,1.0).D  
Sample Name: FJ-12-199- (OD,5%,1.0)

=====  
Acq. Operator :  
Sample Operator :  
Acq. Instrument : LC1260 Location : 1  
Injection Date : 27/06/2020 16:15:48 Inj Volume : No inj  
Acq. Method : C:\Chem32\1\Methods\DEF\_LC.M  
Last changed : 27/06/2020 15:54:59 by  
(modified after loading)  
Analysis Method : C:\Chem32\1\Methods\DEF\_LC.M  
Last changed : 13/02/2014 23:27:44 by SYSTEM  
Additional Info : Peak(s) manually integrated

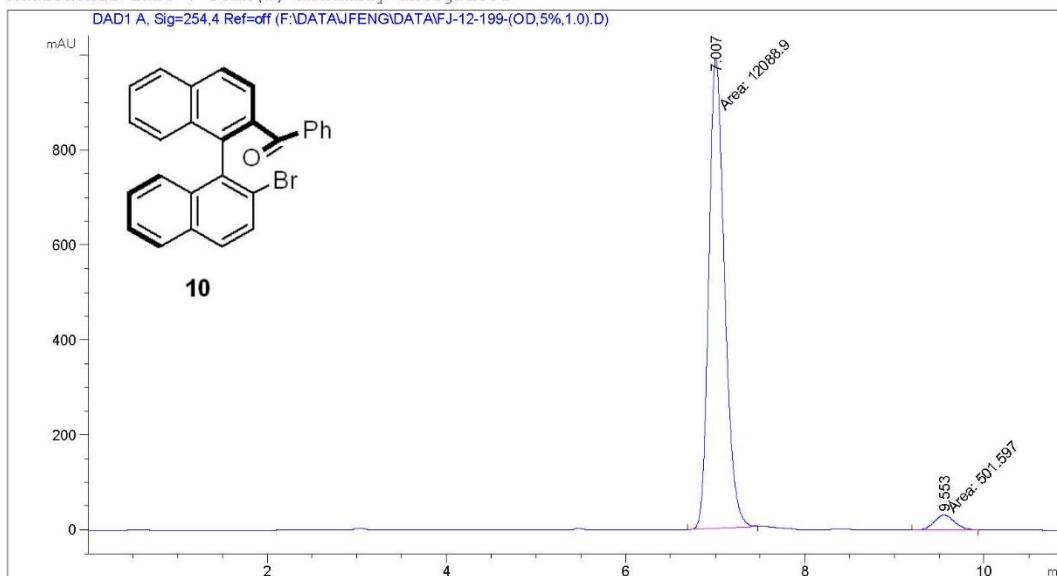

=====  
Area Percent Report  
=====

Sorted By : Signal  
Multiplier : 1.0000  
Dilution : 1.0000  
Use Multiplier & Dilution Factor with ISTDs

Signal 1: DAD1 A, Sig=254,4 Ref=off

| Peak # | RetTime [min] | Type | Width [min] | Area [mAU*s] | Height [mAU] | Area %  |
|--------|---------------|------|-------------|--------------|--------------|---------|
| 1      | 7.007         | MM   | 0.2034      | 1.20889e4    | 990.55432    | 96.0161 |
| 2      | 9.553         | MM   | 0.2690      | 501.59738    | 31.07435     | 3.9839  |

Totals : 1.25905e4 1021.62867

**Supplementary Figure 220. HPLC data of 10**

Data File F:\DATA\JFENG\DATA\FJ-12-198-race(OD,5%,1.0).D  
Sample Name: FJ-12-198-race(OD,5%,1.0)

=====  
Acq. Operator : Location : 1  
Injection Date : 28/06/2020 09:24:05  
Acq. Method : JFeng.M  
Analysis Method : C:\Chem32\1\Methods\DEF\_LC.M  
Last changed : 13/02/2014 23:27:44 by SYSTEM  
Additional Info : Peak(s) manually integrated

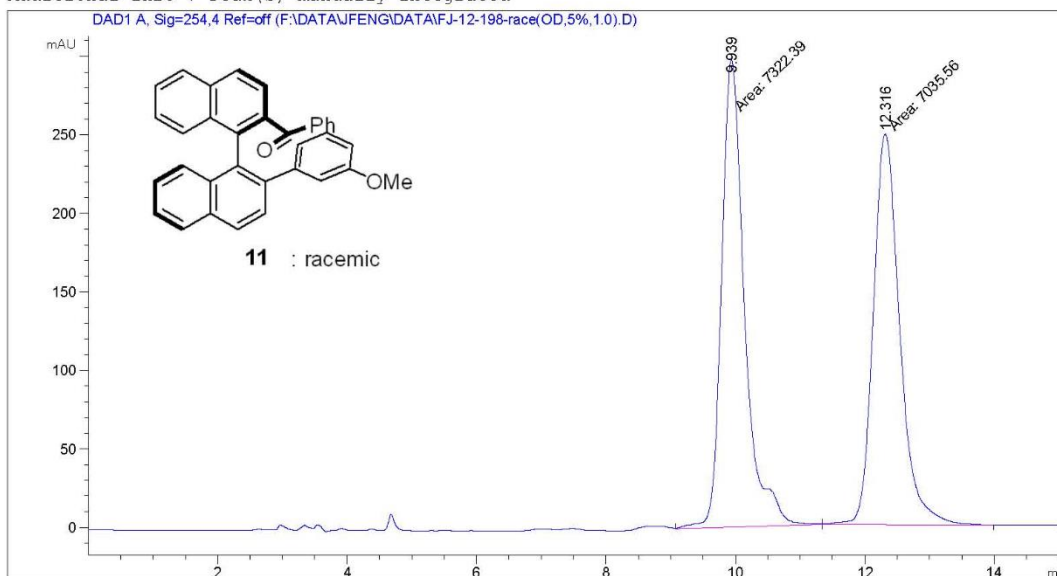

=====  
Area Percent Report  
=====

Sorted By : Signal  
Multiplier : 1.0000  
Dilution : 1.0000  
Use Multiplier & Dilution Factor with ISTDs

Signal 1: DAD1 A, Sig=254,4 Ref=off

| Peak # | RetTime [min] | Type | Width [min] | Area [mAU*s] | Height [mAU] | Area %  |
|--------|---------------|------|-------------|--------------|--------------|---------|
| 1      | 9.939         | MM   | 0.4101      | 7322.38721   | 297.60254    | 50.9989 |
| 2      | 12.316        | MM   | 0.4715      | 7035.55566   | 248.70322    | 49.0011 |

Totals : 1.43579e4 546.30576

=====  
\*\*\* End of Report \*\*\*

**Supplementary Figure 221. HPLC data of 11**

Data File F:\DATA\JFENG\DATA\FJ-12-200-(OD,5%,1.0).D  
Sample Name: FJ-12-200-(OD,5%,1.0)

=====  
Acq. Operator : Location : 1  
Injection Date : 28/06/2020 09:42:18  
Acq. Method : JFeng.M  
Analysis Method : C:\Chem32\1\Methods\DEF\_LC.M  
Last changed : 13/02/2014 23:27:44 by SYSTEM  
Additional Info : Peak(s) manually integrated

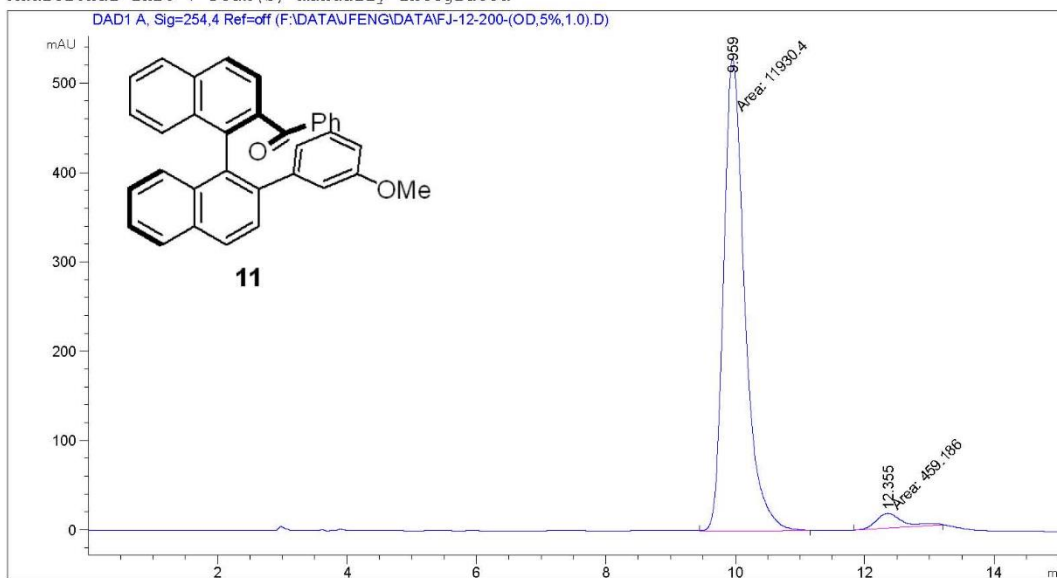

=====  
Area Percent Report  
=====

Sorted By : Signal  
Multiplier : 1.0000  
Dilution : 1.0000  
Use Multiplier & Dilution Factor with ISTDs

Signal 1: DAD1 A, Sig=254,4 Ref=off

| Peak # | RetTime [min] | Type | Width [min] | Area [mAU*s] | Height [mAU] | Area %  |
|--------|---------------|------|-------------|--------------|--------------|---------|
| 1      | 9.959         | MM   | 0.3773      | 1.19304e4    | 527.06537    | 96.2938 |
| 2      | 12.355        | MM   | 0.4676      | 459.18649    | 16.36664     | 3.7062  |

Totals : 1.23896e4 543.43201

=====  
\*\*\* End of Report \*\*\*

**Supplementary Figure 222. HPLC data of 11**

Data File F:\DATA\JFENG\DATA\FJ-12-132-race-(1) (AD,20%,1.0).D  
Sample Name: FJ-12-132-race-(1) (AD,20%,1.0)

=====  
Acq. Operator : Location : 1  
Injection Date : 29/06/2020 21:26:16  
Acq. Method : JFeng.M  
Analysis Method : C:\Chem32\1\Methods\DEF\_LC.M  
Last changed : 13/02/2014 23:27:44 by SYSTEM  
Additional Info : Peak(s) manually integrated

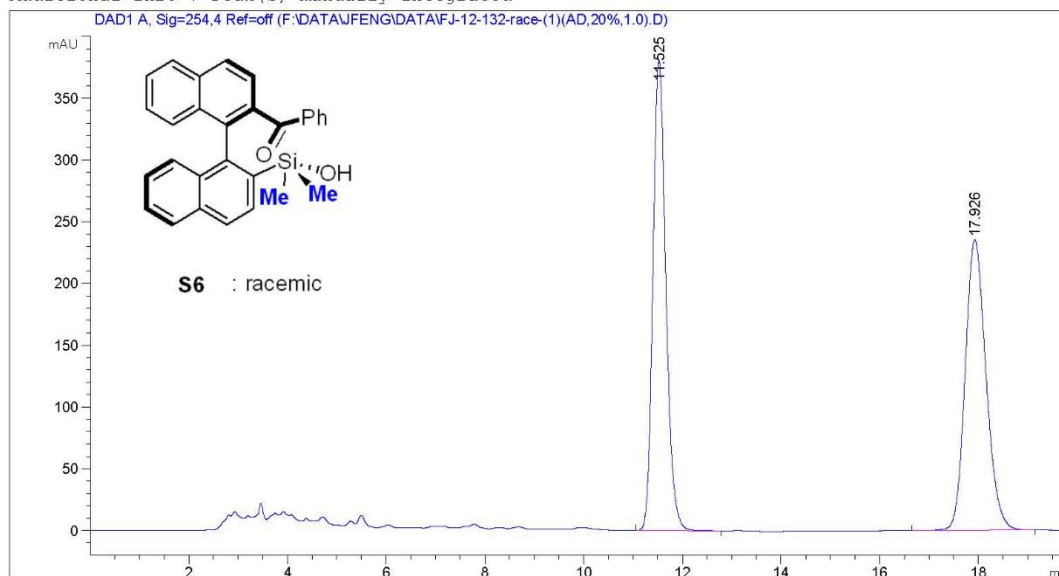

=====  
Area Percent Report  
=====

Sorted By : Signal  
Multiplier : 1.0000  
Dilution : 1.0000  
Use Multiplier & Dilution Factor with ISTDs

Signal 1: DAD1 A, Sig=254,4 Ref=off

| Peak # | RetTime [min] | Type | Width [min] | Area [mAU*s] | Height [mAU] | Area %  |
|--------|---------------|------|-------------|--------------|--------------|---------|
| 1      | 11.525        | BB   | 0.2767      | 6883.16504   | 381.08438    | 49.9439 |
| 2      | 17.926        | BB   | 0.4543      | 6898.61523   | 235.11957    | 50.0561 |

Totals : 1.37818e4 616.20395

=====  
\*\*\* End of Report \*\*\*

**Supplementary Figure 223. HPLC data of S6**

Data File F:\DATA\JFENG\DATA\FJ-12-197 (AD,20%,1.0).D  
Sample Name: FJ-12-197 (AD,20%,1.0)

=====  
Acq. Operator :  
Sample Operator :  
Acq. Instrument : LC1260 Location : 1  
Injection Date : 29/06/2020 21:48:05 Inj Volume : Manually  
Acq. Method : F:\METHOD\JFeng.M  
Last changed : 29/06/2020 21:10:13 by  
(modified after loading)  
Analysis Method : C:\Chem32\1\Methods\DEF\_LC.M  
Last changed : 13/02/2014 23:27:44 by SYSTEM  
Additional Info : Peak(s) manually integrated

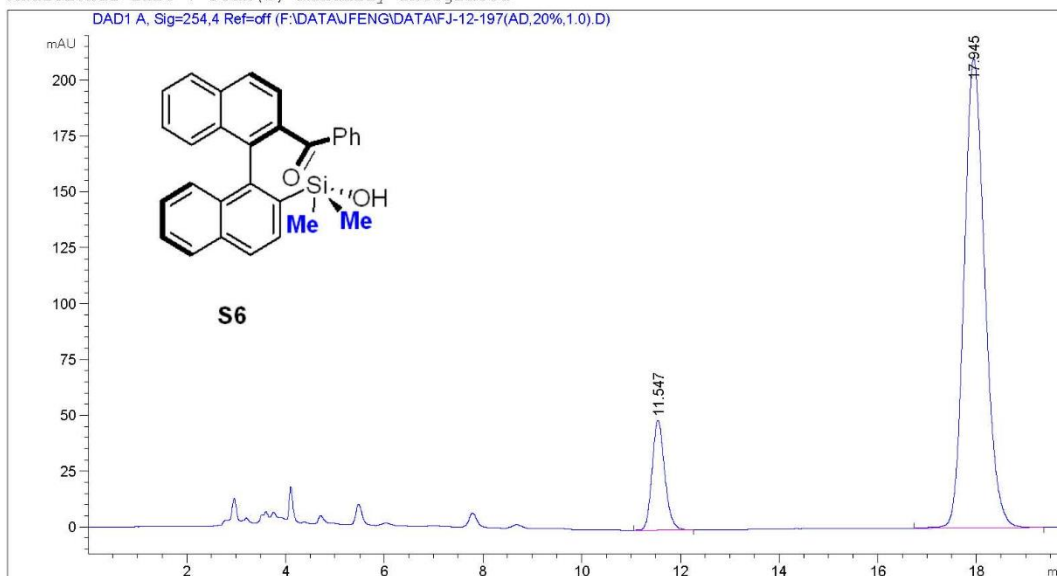

=====  
Area Percent Report  
=====

Sorted By : Signal  
Multiplier : 1.0000  
Dilution : 1.0000  
Use Multiplier & Dilution Factor with ISTDs

Signal 1: DAD1 A, Sig=254,4 Ref=off

| Peak # | RetTime [min] | Type | Width [min] | Area [mAU*s] | Height [mAU] | Area %  |
|--------|---------------|------|-------------|--------------|--------------|---------|
| 1      | 11.547        | BB   | 0.2694      | 863.20203    | 49.03444     | 12.4029 |
| 2      | 17.945        | BB   | 0.4469      | 6096.48047   | 209.86026    | 87.5971 |

Totals : 6959.68250 258.89470

LC1260 01/07/2020 21:10:55

Page 1 of 2

**Supplementary Figure 224. HPLC data of S6**

## Supplementary References

1. Wu, B., Yoshikai, N. Conversion of 2-Iodobiphenyls into 2,2'-Diiodobiphenyls via Oxidation-Iodination Sequences: A Versatile Route to Ladder-Type Heterofluorenes *Angew. Chem. Int. Ed.* **54**, 8736–8739 (2015).
2. Zhao, K., Duan, L., Xu, S., Jiang, J., Fu, Y., Gu, Z. Enhanced Reactivity by Torsional Strain of Cyclic Diaryliodonium in Cu-Catalyzed Enantioselective Ring-Opening Reaction *Chem*, **4**, 599-612 (2018).
3. Liao, Y., Liang, C. One-pot synthesis of thioesters with sodium thiosulfate as a sulfur surrogate under transition metal-free conditions. *Org. Biomol. Chem.*, **16**, 1871-1881 (2018)
4. Leifert, D., Studer, A. 9-Silafluorenes via Base-Promoted Homolytic Aromatic Substitution (BHAS) – The Electron as a Catalyst *Org. Lett.* **17**, 386–389 (2015).
5. Frisch, M. J., Trucks, G., W. Schlegel, H. B., Scuseria, G. E., Robb, M. A., Cheeseman, J. R., Scalmani, G., Barone, V., Petersson, G. A., Nakatsuji, H., Li, X., Caricato, M., Marenich, A. V., Bloino, J., Janesko, B. G., Gomperts, R., Mennucci, B., Hratchian, H. P., Ortiz, J. V., Izmaylov, A. F., Sonnenberg, J. L., Williams-Young, D., Ding, F., Lipparini, F., Egidi, F., Goings, J., Peng, B., Petrone, A., Henderson, T., Ranasinghe, D., Zakrzewski, V. G., Gao, J., Rega, N., Zheng, G., Liang, W., Hada, M., Ehara, M., Toyota, K., Fukuda, R., Hasegawa, J., Ishida, M., Nakajima, T., Honda, Y., Kitao, O., Nakai, H., Vreven, T., Throssell, K., Montgomery, J. A., Peralta, Jr., J. E., Ogliaro, F., Bearpark, M. J., Heyd, J. J., Brothers, E. N., Kudin, K. N., Staroverov, V. N., Keith, T. A., Kobayashi, R., Normand, J., Raghavachari, K., Rendell, A. P., Burant, J. C., Iyengar, S. S., Tomasi, J., Cossi, M., Millam, J. M., Klene, M., Adamo, C., Cammi, R., Ochterski, J. W., Martin, R. L., Morokuma, K., Farkas, O., Foresman, J. B. and Fox, D. J. *Gaussian 16, Revision C.03*, Gaussian, Inc., Wallingford CT (2016).
6. Miehlich, B., Savin, A., Stoll, H. and Preuss. H. Results obtained with the correlation-energy density functionals of Becke and Lee, Yang and Parr *Chem. Phys. Lett.* **157**, 200-206 (1989).
7. Lee, C., Yang, W., and Parr. R. G. Development of the Colle-Salvetti correlation-energy formula into a functional of the electron density *Phys. Rev. B* **37**, 785-789 (1988).
8. Grimme, S., Antony, J., Ehrlich, S., and Krieg. H. A consistent and accurate ab initio parameterization of density functional dispersion correction (DFT-D) for the 94 elements H-Pu *J. Chem. Phys.* **132**, 154104 (2010).
9. Grimme, S., Ehrlich, S., and Goerigk. L., Effect of the damping function in dispersion corrected density functional theory *J. Comp. Chem.* **32**, 1456-1465 (2011).
10. Pople, J. A., Krishnan, R., Schlegel, H. B. and Binkley. J. S. Electron Correlation Theories and Their Application to the Study of Simple Reaction Potential Surfaces *Int. J. Quantum Chem.* **14**, 545-560 (1978).
11. Krishnan, R., Binkley, J. S., Seeger, R., and Pople. J. A. Self-consistent molecular orbital methods. XX. A basis set for correlated wave functions *J. Chem. Phys.* **72**, 650-654 (1980).
12. Fukui. K. The path of chemical-reactions - The IRC approach *Acc. Chem. Res.* **14**, 363-368 (1981).
13. Schaefer, A., Horn, H. and Ahlrichs. R. Fully optimized contracted Gaussian-basis sets for atoms Li to Kr *J. Chem. Phys.* **97**, 2571-2577 (1992).
14. Schaefer, A., Huber, C., and Ahlrichs. R. Fully optimized contracted Gaussian-basis sets of



- triple zeta valence quality for atoms Li to Kr *J. Chem. Phys.* **100**, 5829-5835 (1994).
15. Weigend, F., and Ahlrichs, R. Balanced basis sets of split valence, triple zeta valence and quadruple zeta valence quality for H to Rn: Design and assessment of accuracy *Phys. Chem. Chem. Phys.* **7**, 3297-3305 (2005).
  16. Weigend, F. Accurate Coulomb-fitting basis sets for H to Rn *Phys. Chem. Chem. Phys.* **8**, 1057-1065 (2006).
  17. Goerigk, L. and Grimme, S. Efficient and Accurate Double-Hybrid-Meta-GGA Density Functionals—Evaluation with the Extended GMTKN30 Database for General Main Group Thermochemistry, Kinetics, and Noncovalent Interactions *J. Chem. Theory Comput.* **7**, 291-309 (2011).
  18. Grimme, S. Semiempirical hybrid density functional with perturbative second-order correlation *J. Chem. Phys.* **124**, 034108 (2006).
  19. Schwabe, T. and Grimme, S. Double-hybrid density functionals with long-range dispersion corrections: higher accuracy and extended applicability *Phys. Chem. Chem. Phys.* **9**, 3397-3406 (2007).
