# Supplementary material for: Catalytic asymmetric C–Si bond activation via torsional strain-promoted Rh-catalyzed aryl-Narasaka acylation
Source: PubMed Central journal article supplement (PMC7477585; doi:10.1038/s41467-020-18273-3), 2020-09-07
Supplement: 41467_2020_18273_MOESM3_ESM.pdf [file 41467_2020_18273_MOESM3_ESM.pdf]

## Description of Additional Supplementary Files

File Name: Supplementary Data 1

Description: This file contains Cartesian coordinates for all optimized geometries, including **4c**, **H<sub>2</sub>**, **4c-HH**, **(R)-4a**, **4a-HH**, **4c'**, **4c'-H**, **4c''**, **4a'**, **4a'-H**, **4a''**, **TS-rs**, **(S)-4a**.
